# Supplementary material
Source: PubMed Central journal article supplement (PMC3790284)

Protein: gil161611242  
 Score: 103.67  
 Source: AWAN-FT\_090328  
 Scannumber: 5985  
 Method: ITMS; CID; 1

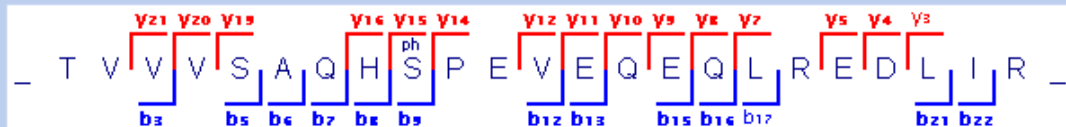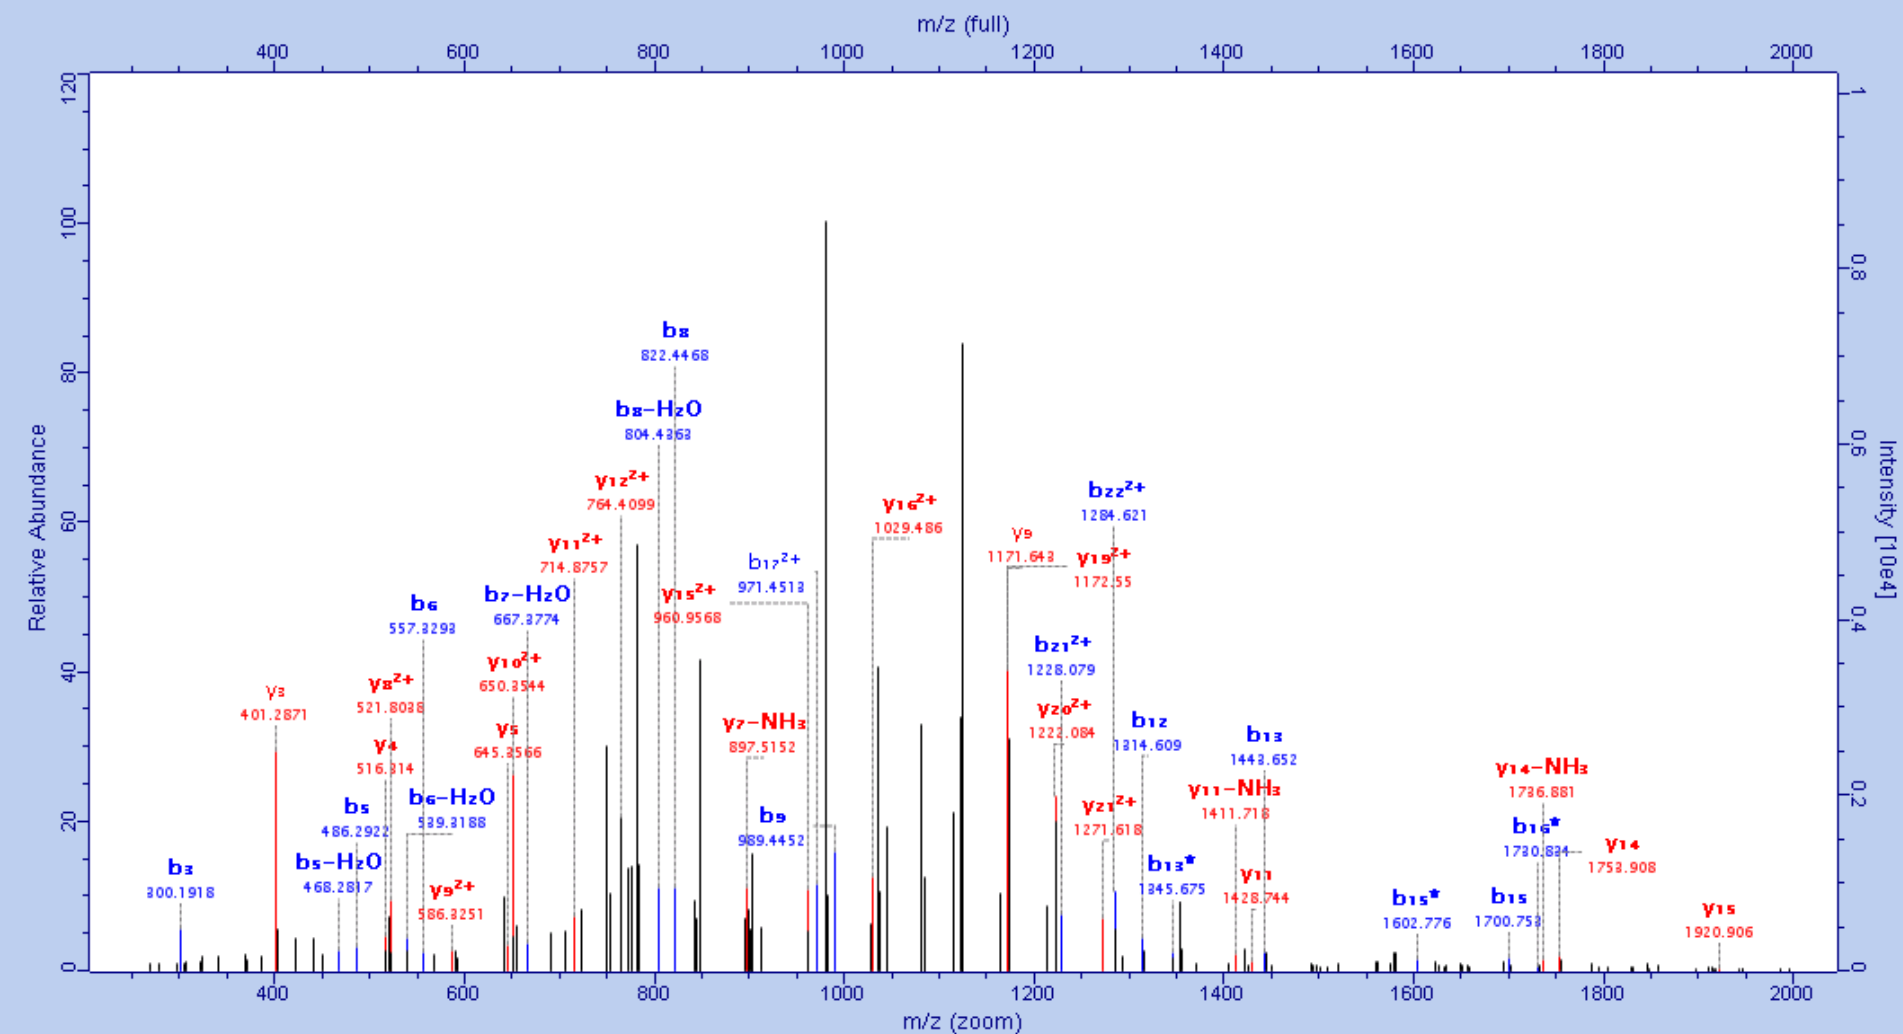

Protein: gill161611242  
Score: 0  
Source: service\_HB12  
Scannumber: 1374  
Method: ITMS; CID; 1

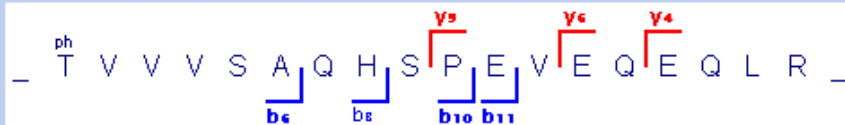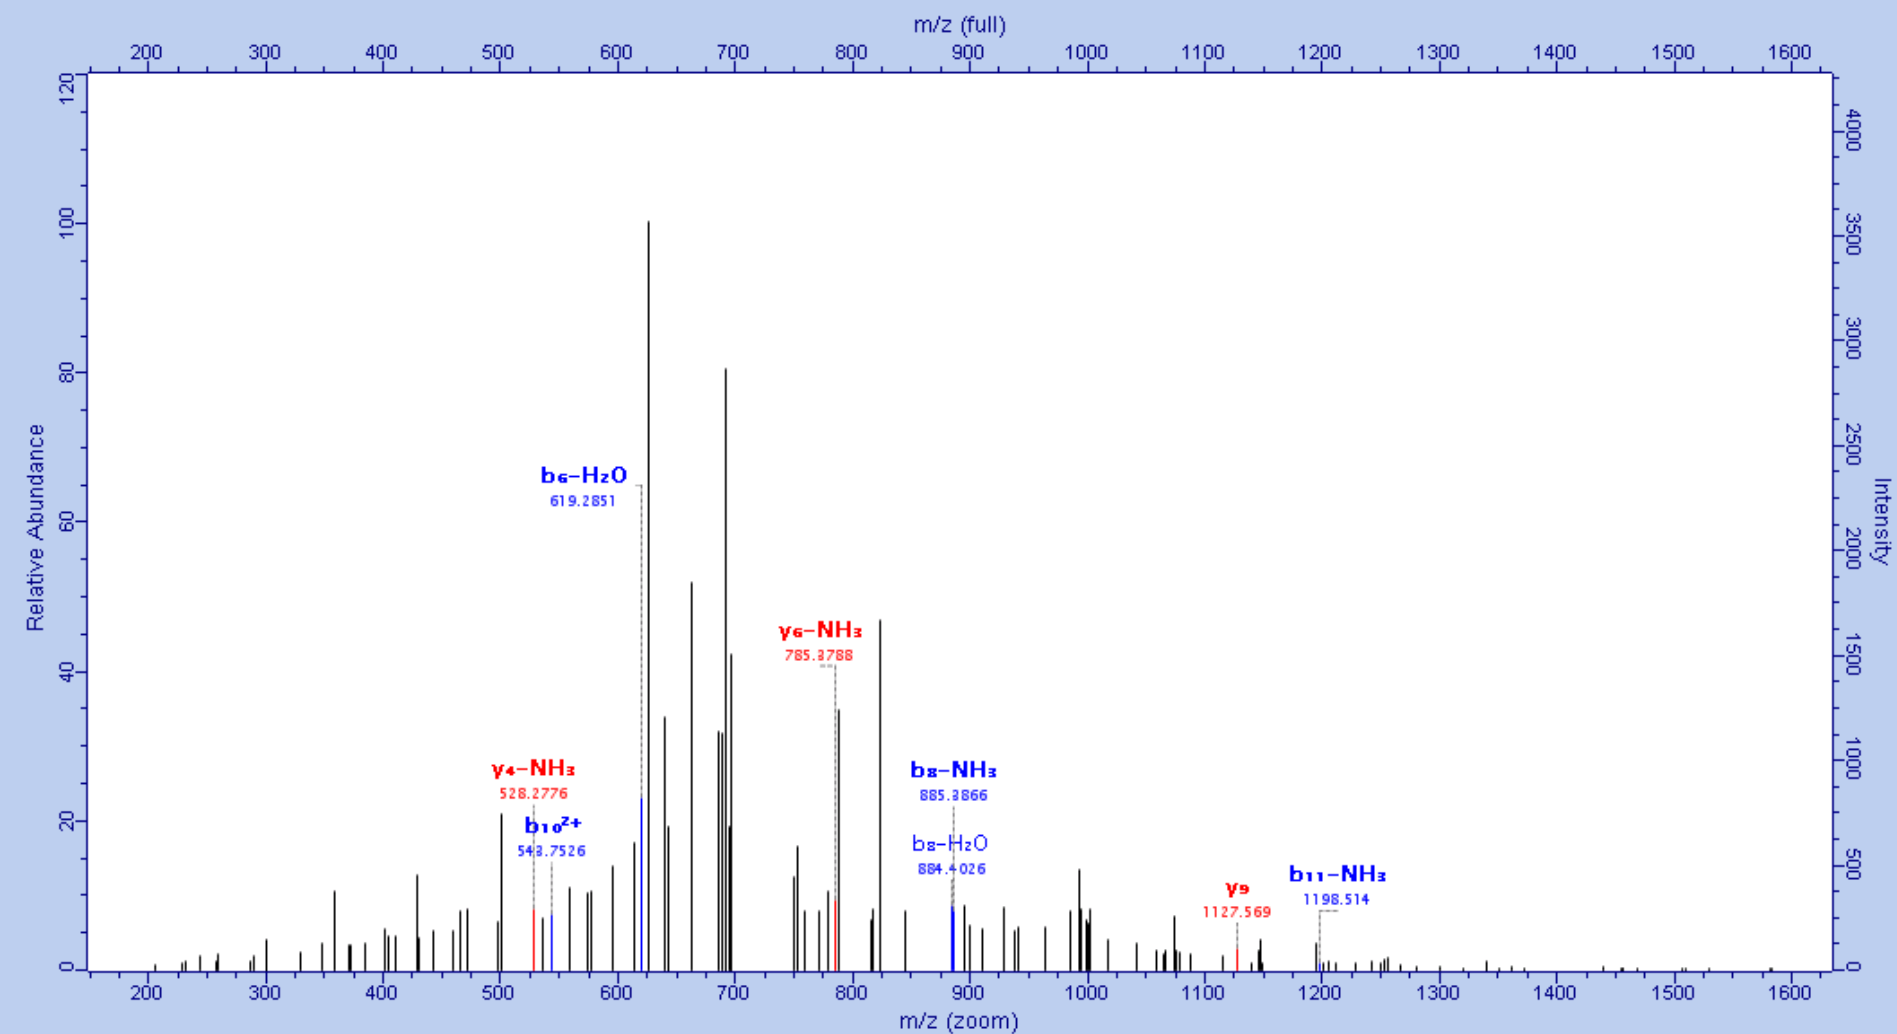

Protein: gil46198396  
Score: 91.56  
Source: service\_4  
Scannumber: 3425  
Method: ITMS; CID: 1

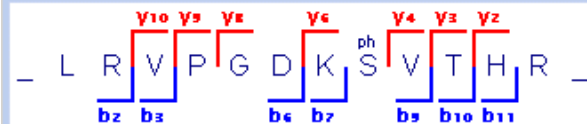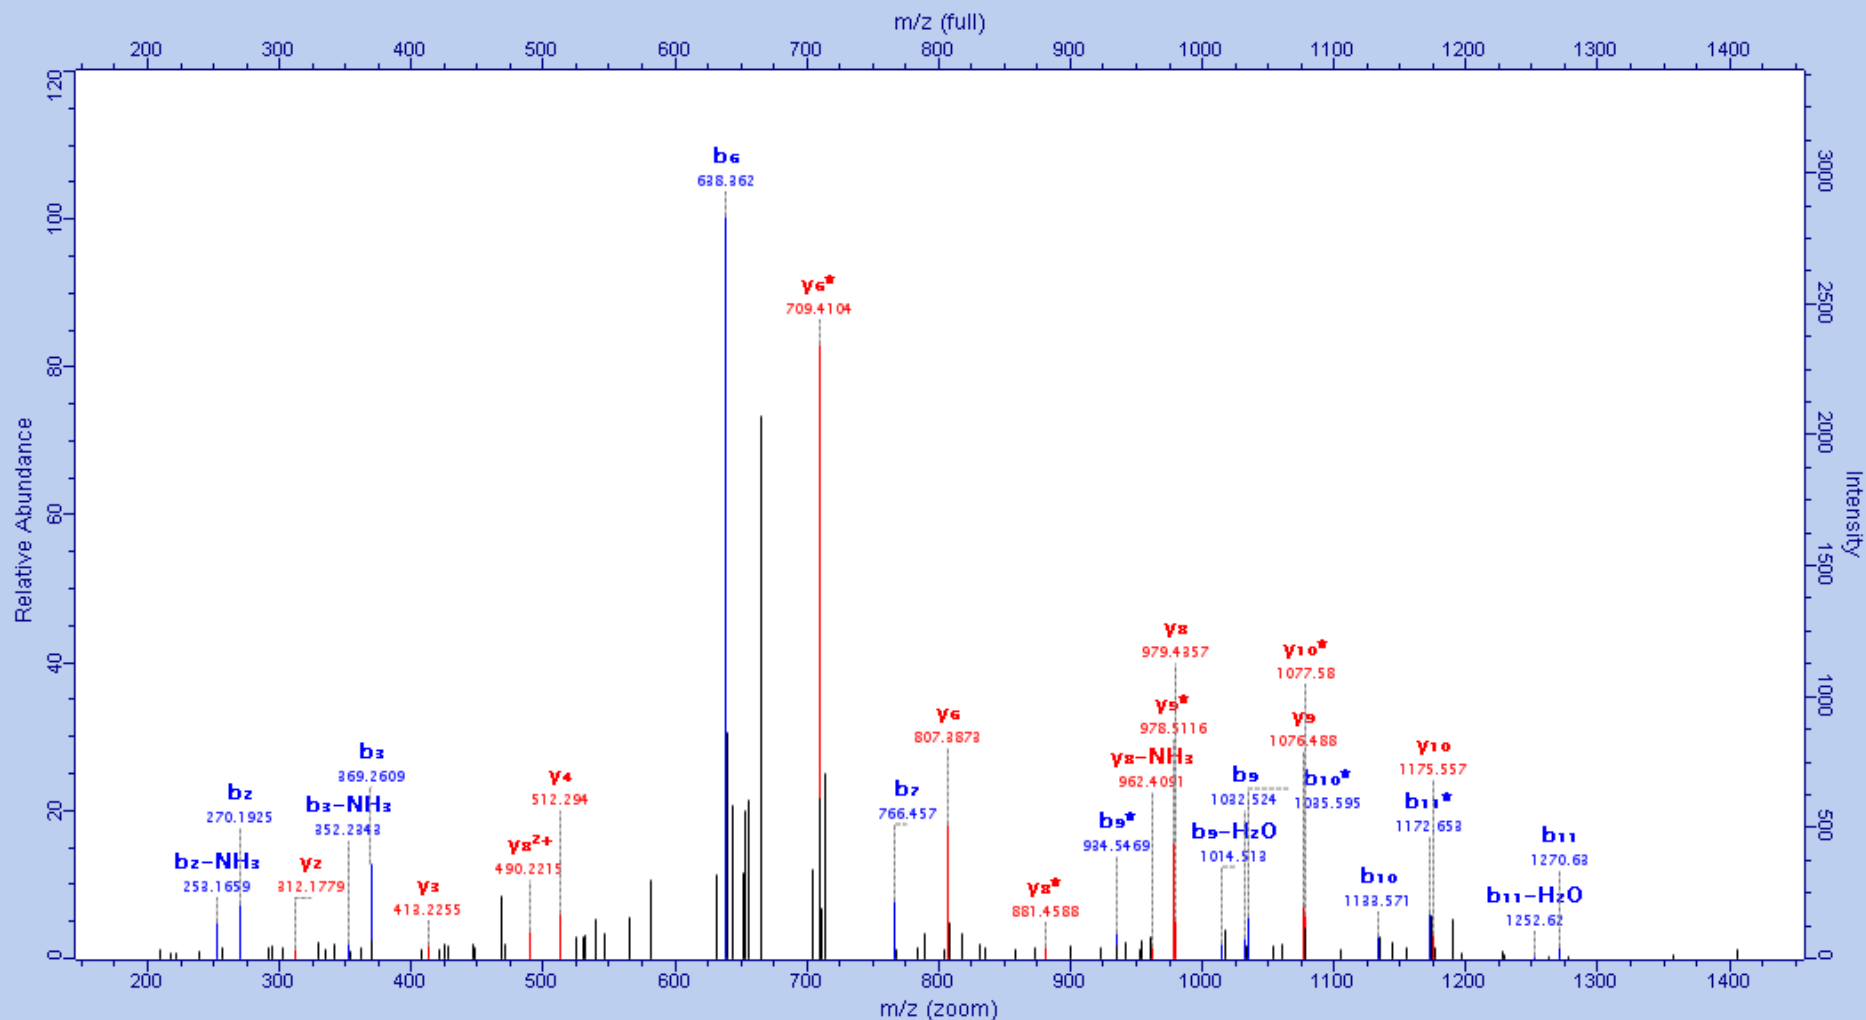

Protein: gil46198396  
 Score: 70.94  
 Source: AWAN-FT\_090928  
 Scannumber: 6344  
 Method: ITMS; CID; 1

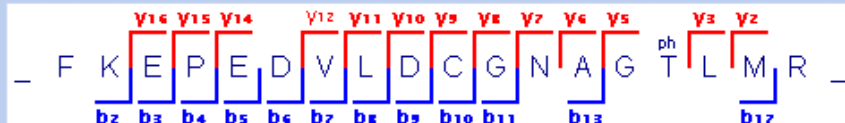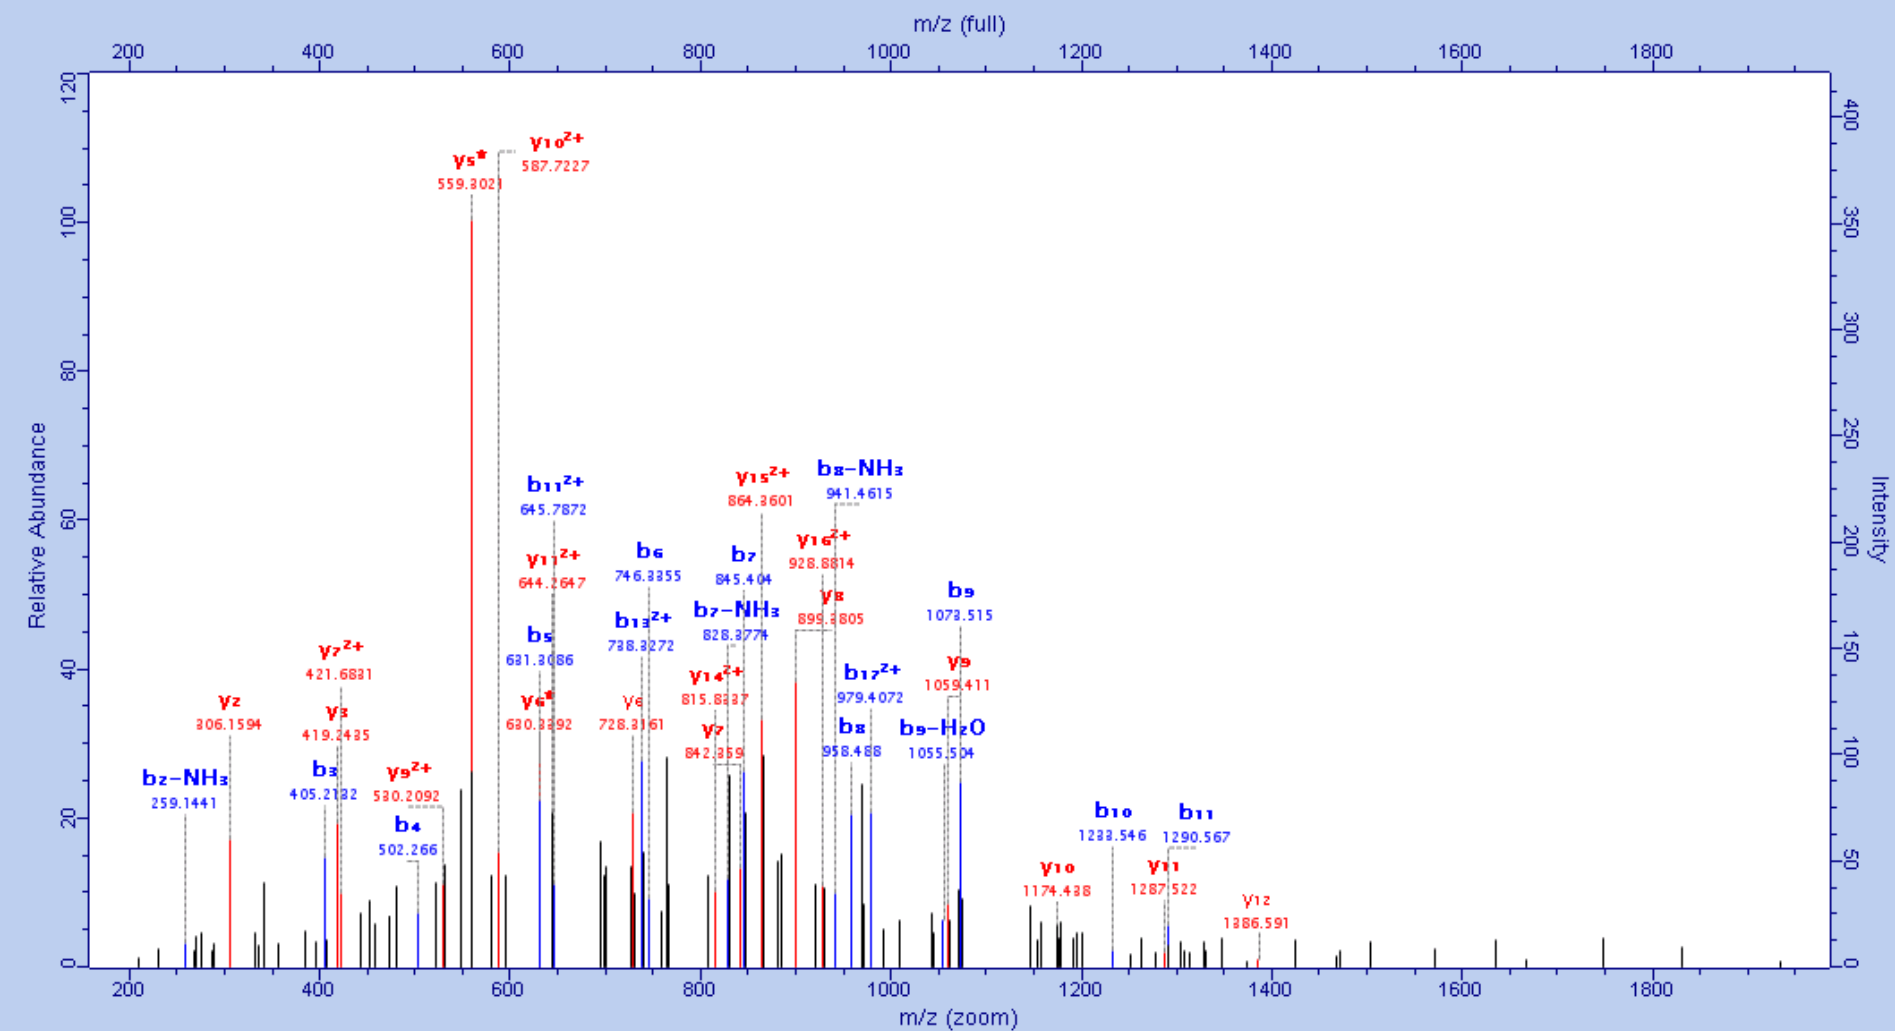

Protein: gil46198396  
Score: 3.79  
Source: service\_HB3  
Scannumber: 1414  
Method: ITMS; CID; 1

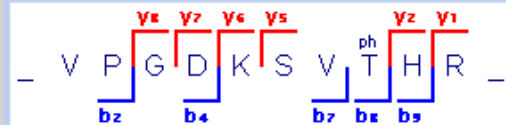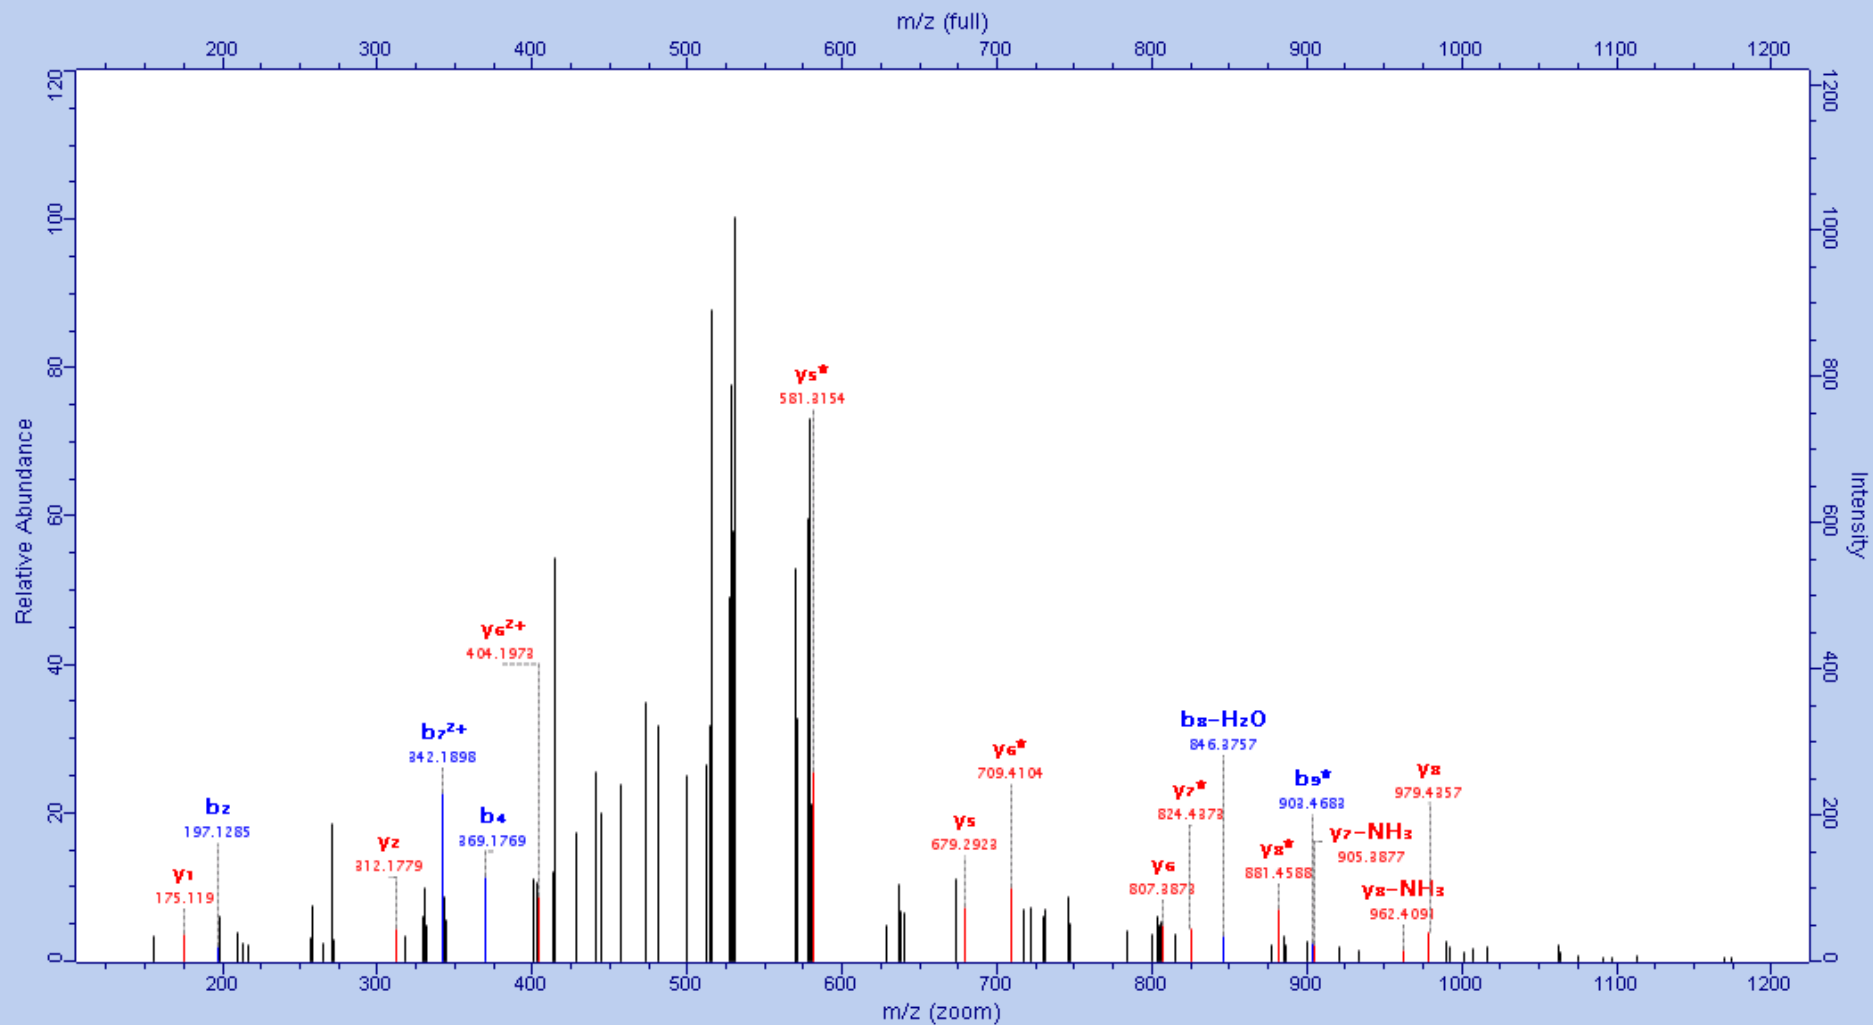

Protein: gil46198337  
 Score: 140.1  
 Source: AWAN-FT\_090928  
 Scannumber: 4430  
 Method: ITMS; CID; 1

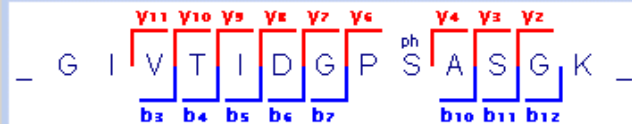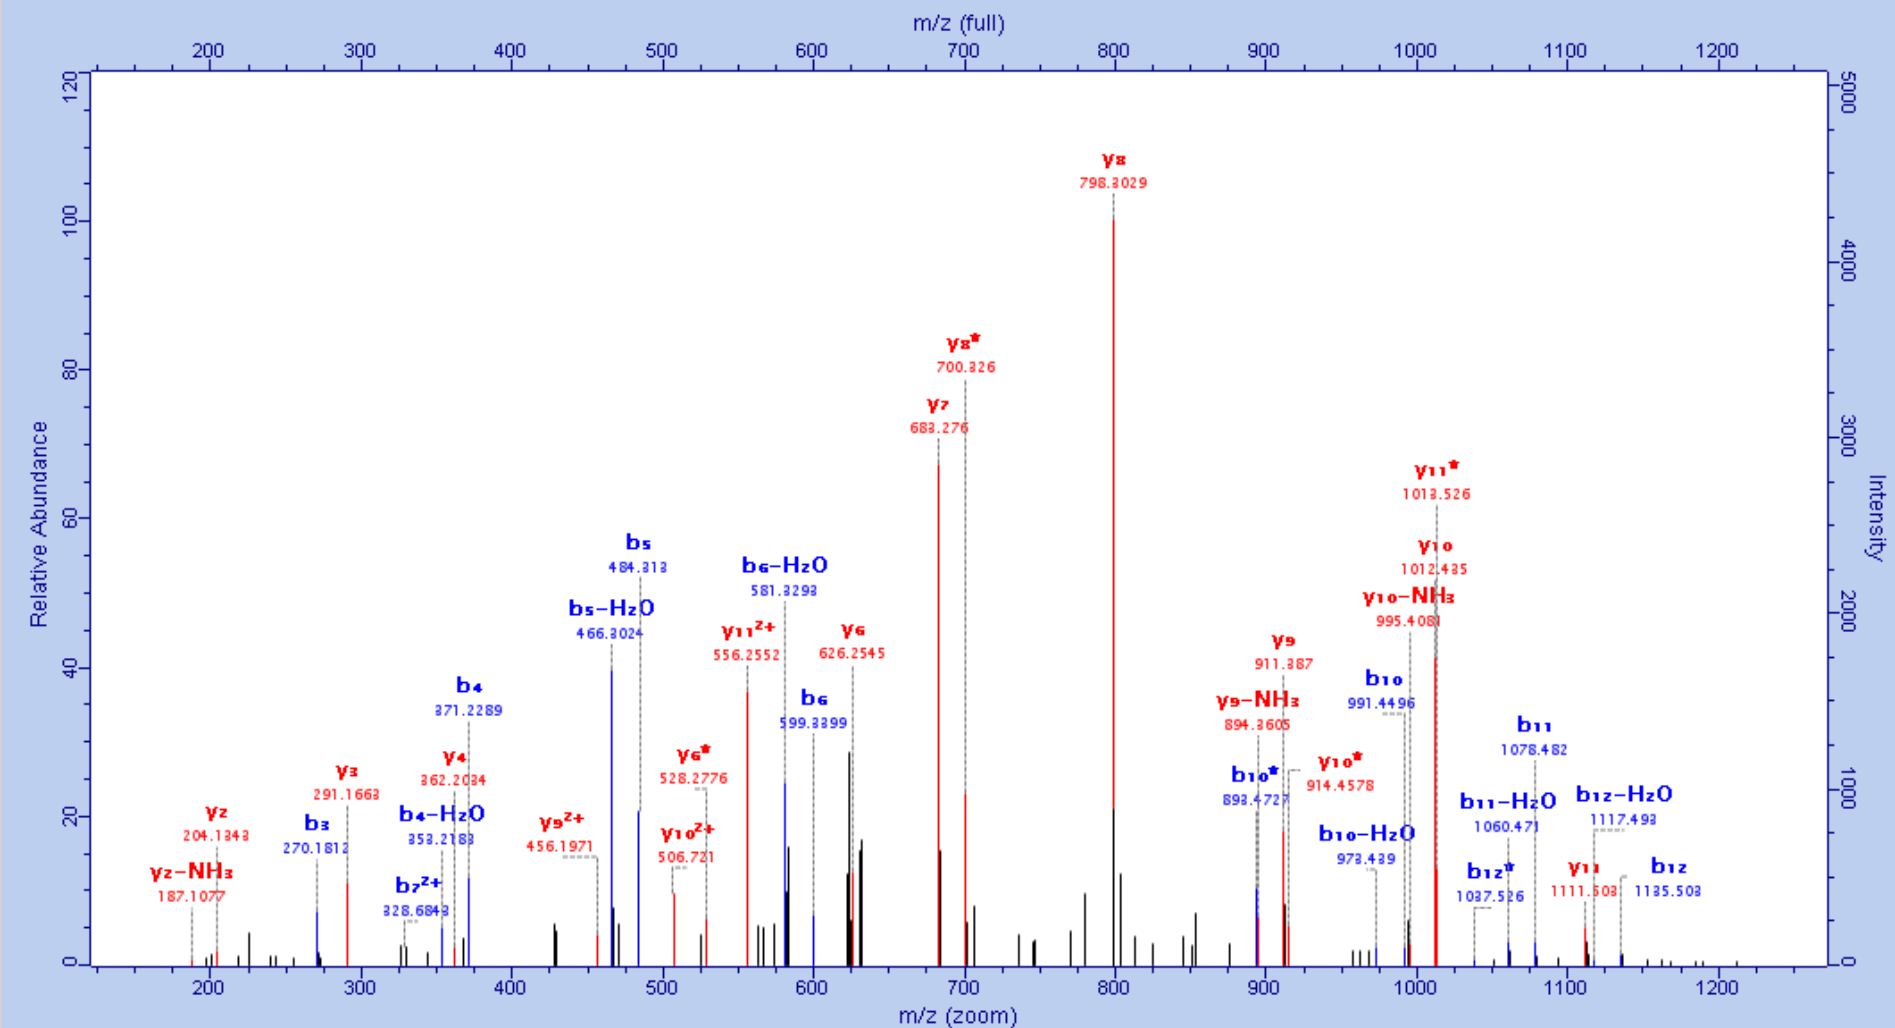

Protein: gil46198397  
 Score: 56.61  
 Source: AWAN-FT\_090928  
 Scannumber: 4437  
 Method: ITMS; CID; 1

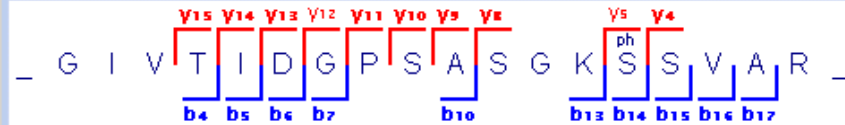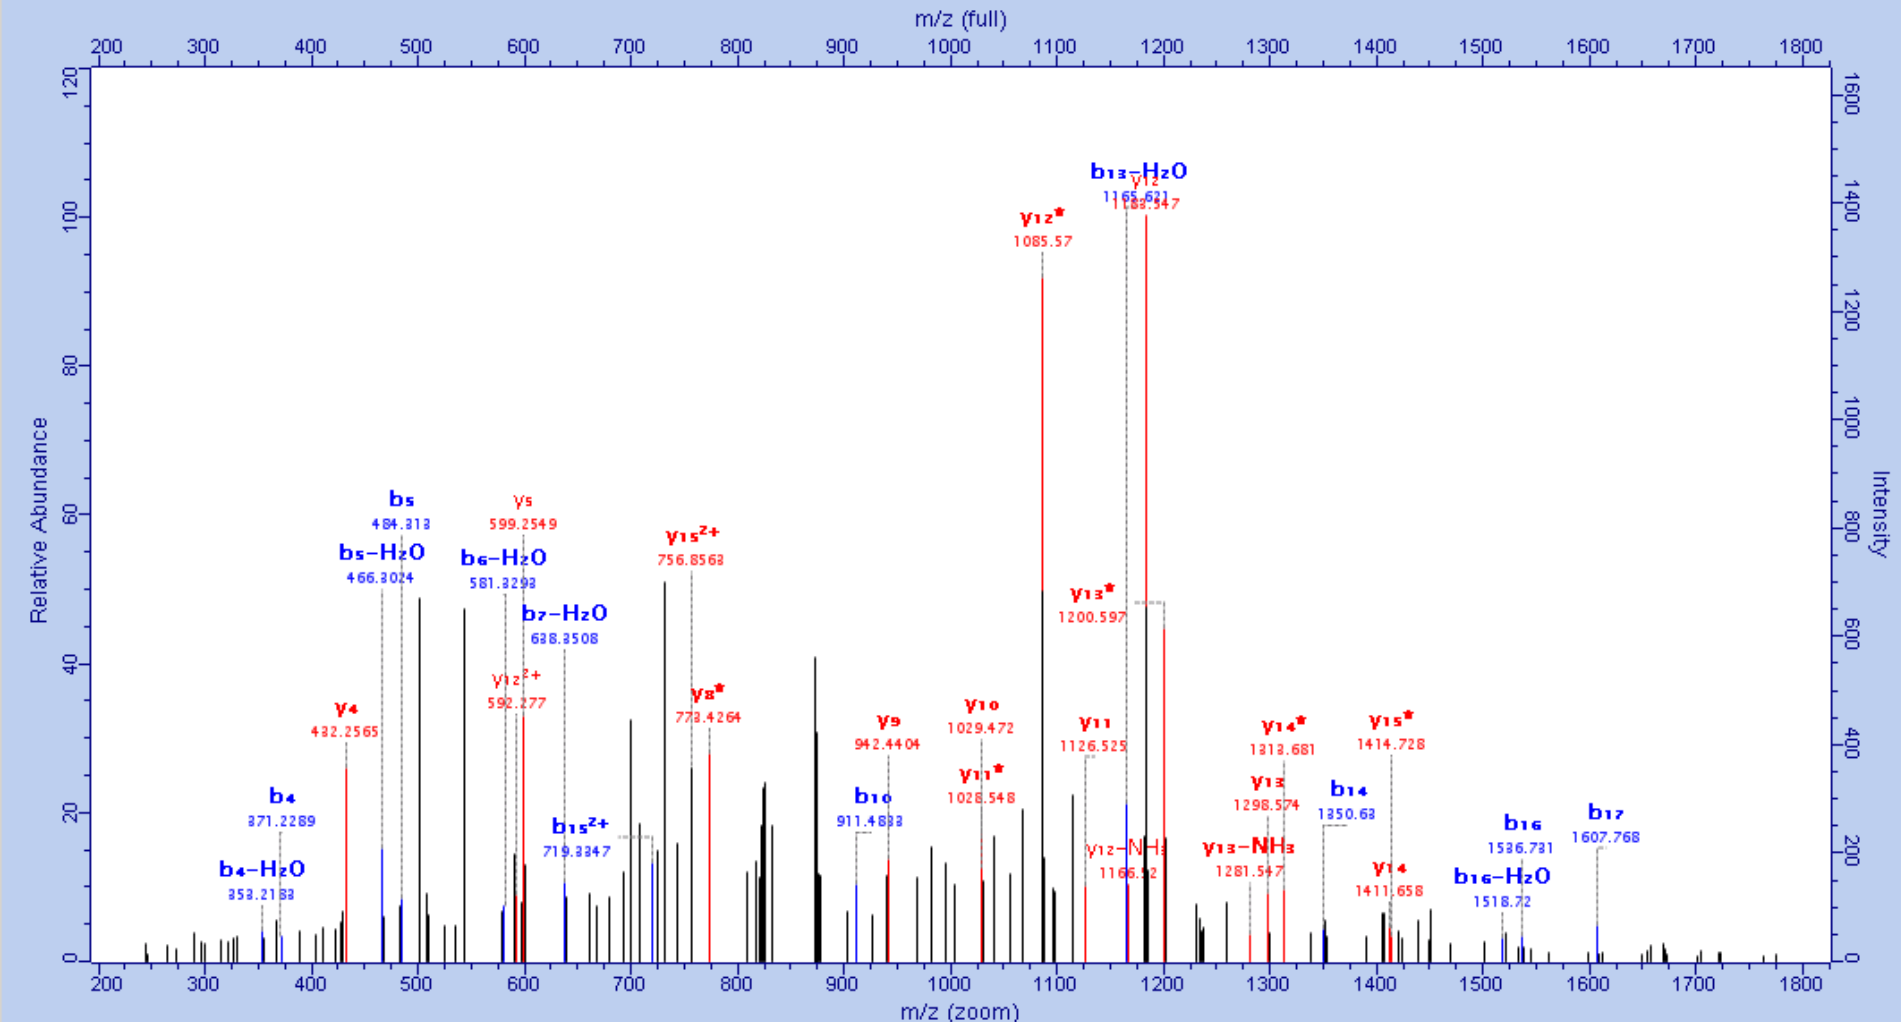

Protein: gil46198425  
Score: 27.36  
Source: AWAN-FT\_090928  
Scannumber: 7263  
Method: ITMS; CID; 1

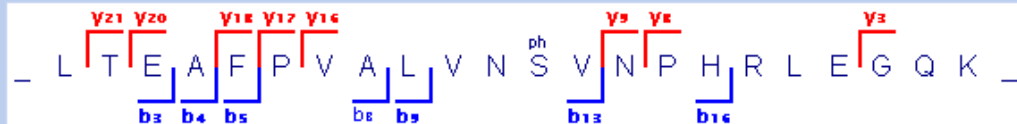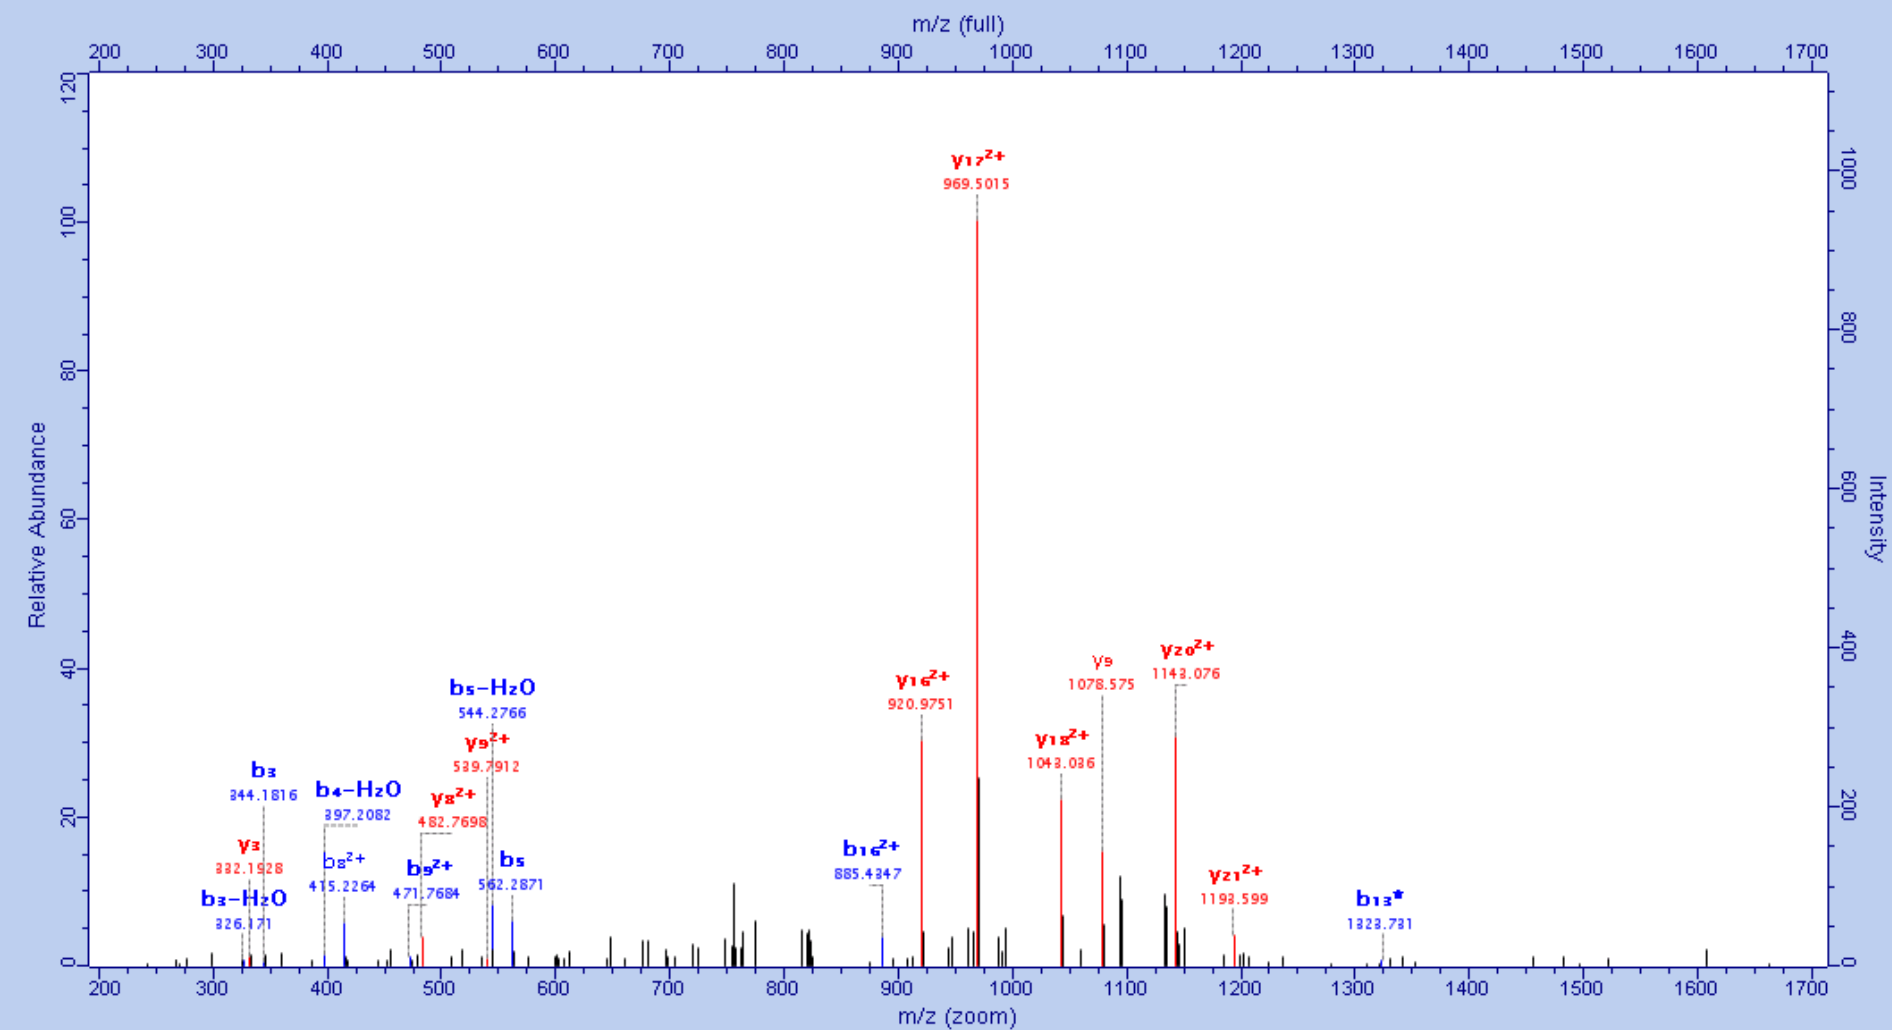



Protein: gil46198467  
 Score: 80.25  
 Source: AWAN-FT\_090928  
 Scannumber: 3588  
 Method: ITMS; CID; 1

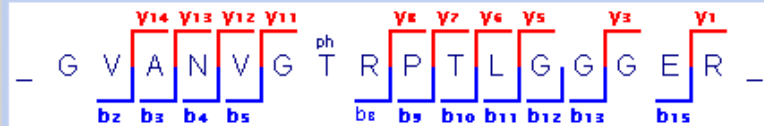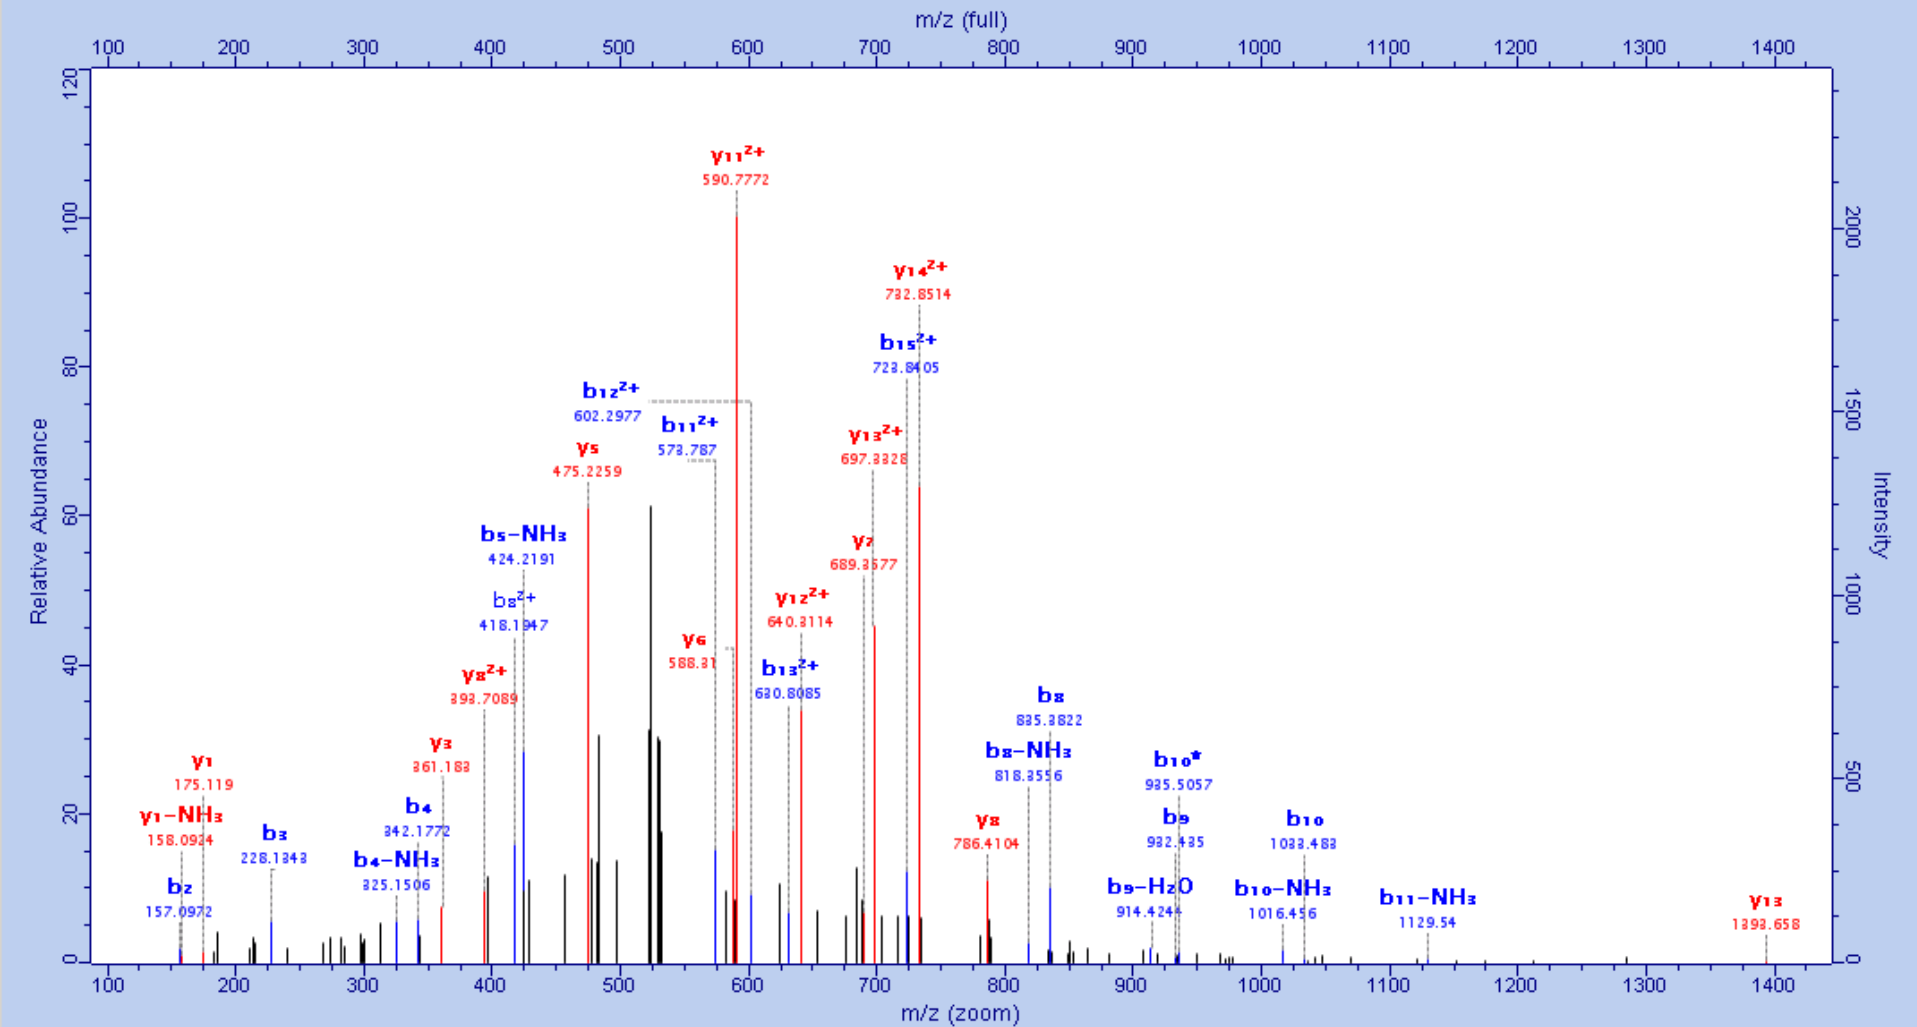

Protein: gil46198474  
 Score: 101.26  
 Source: AWAN-FT\_090928  
 Scannumber: 3839  
 Method: ITMS; CID; 1

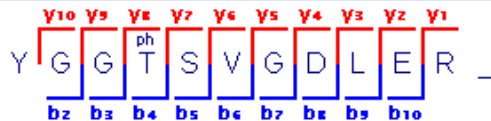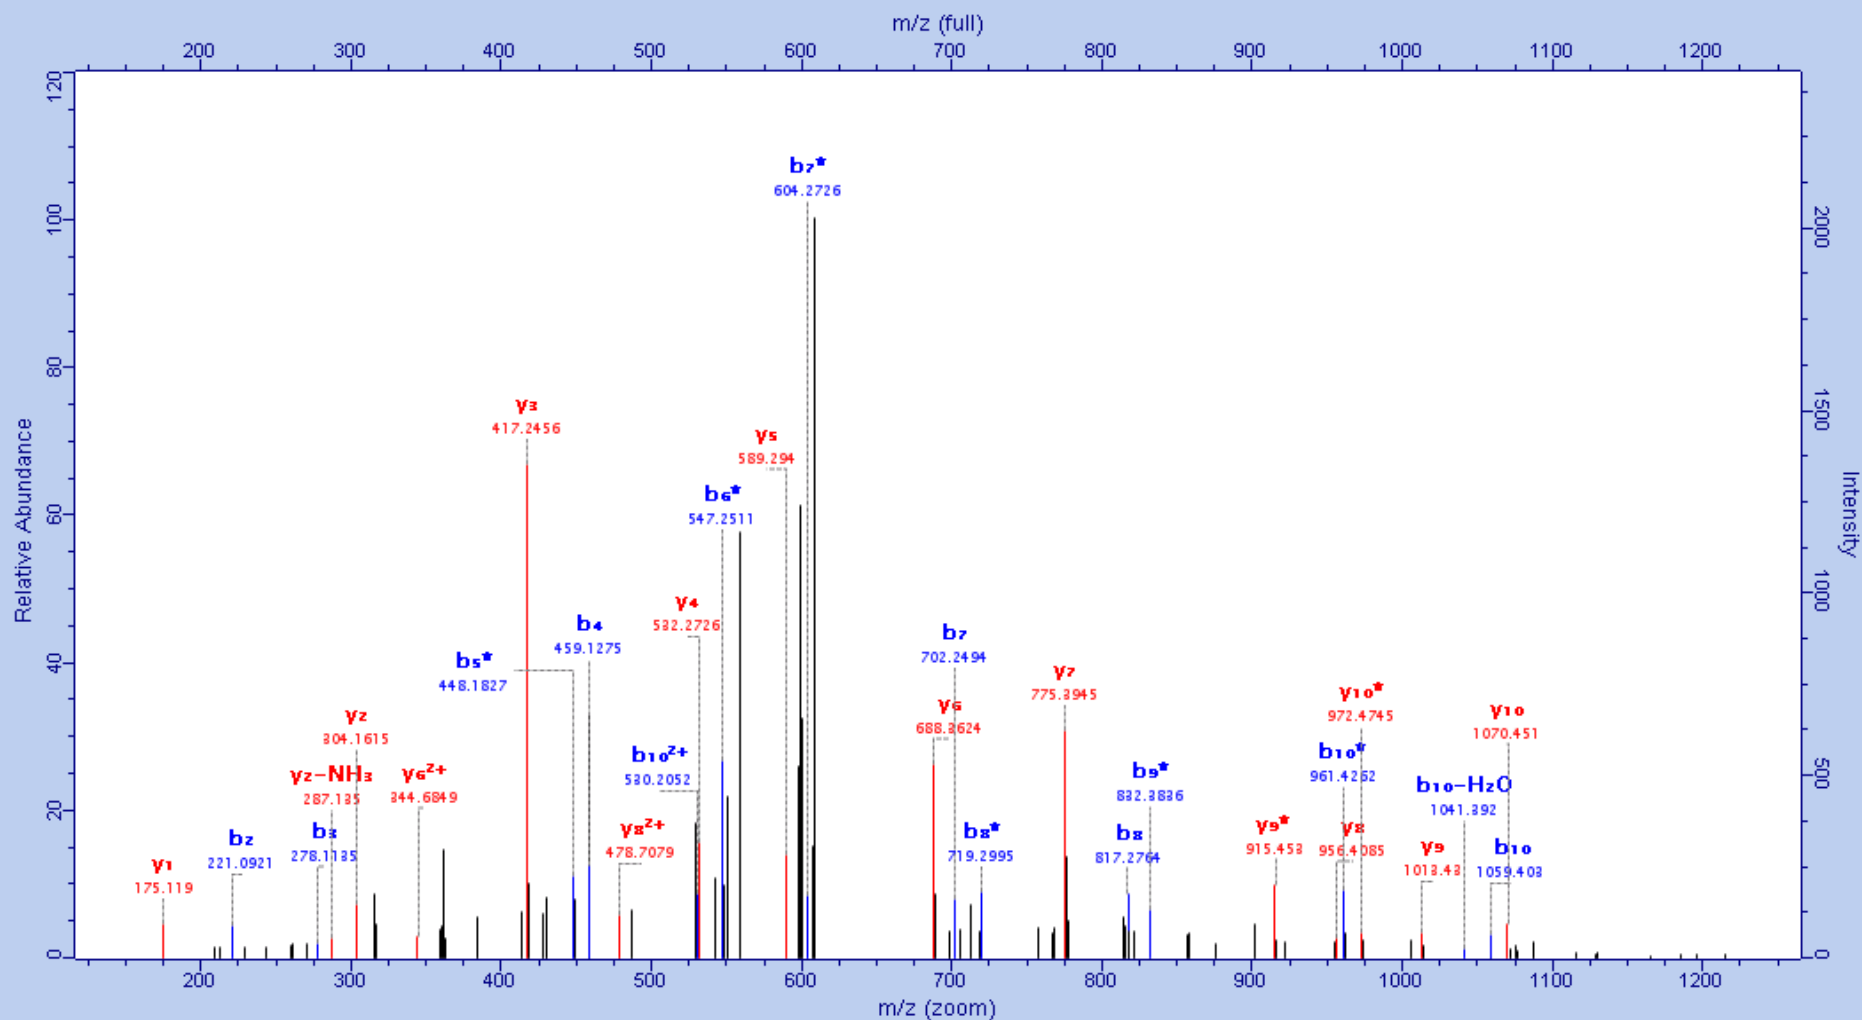

Protein: gil46198477  
 Score: 61.35  
 Source: service\_HB12  
 Scannumber: 2939  
 Method: ITMS; CID; 1

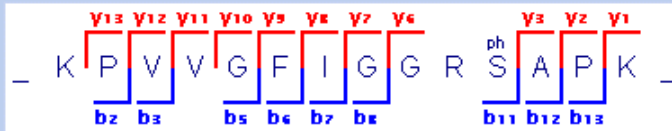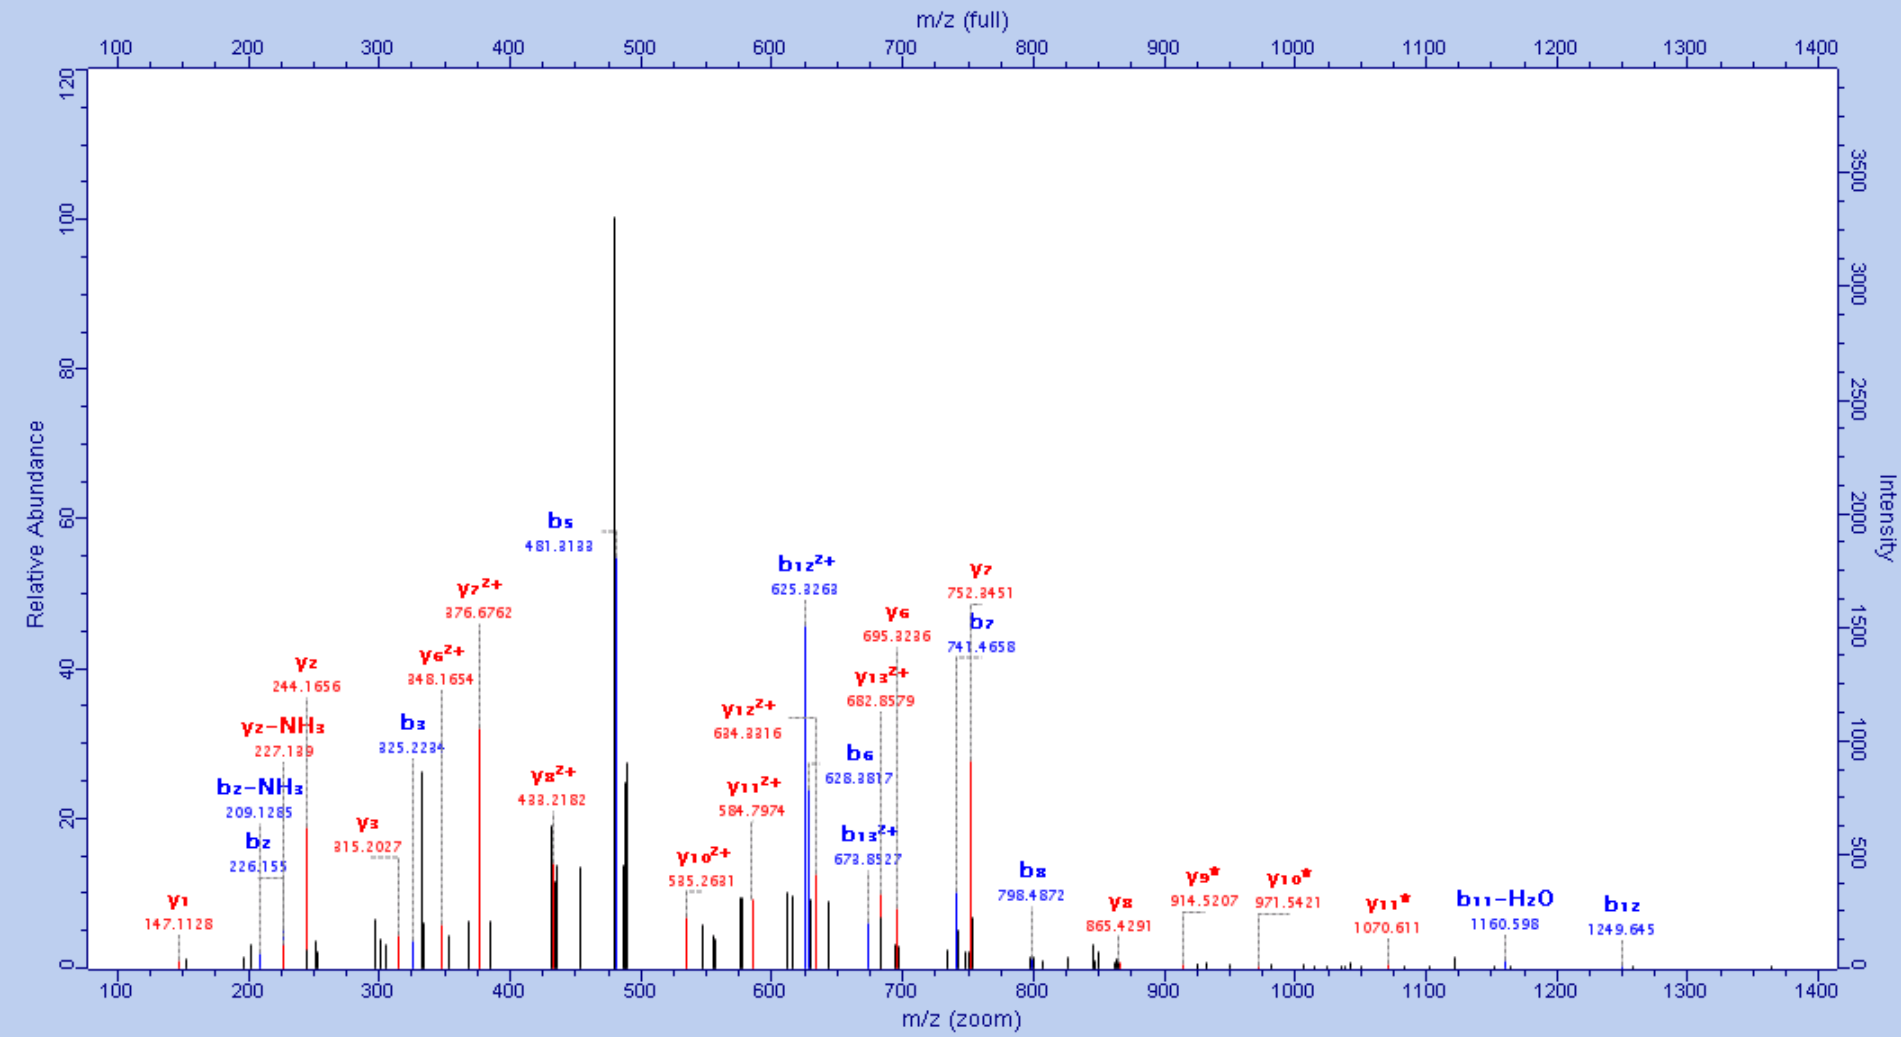

Protein: gil46198599  
 Score: 177.68  
 Source: service\_HB7  
 Scannumber: 3302  
 Method: ITMS; CID; 1

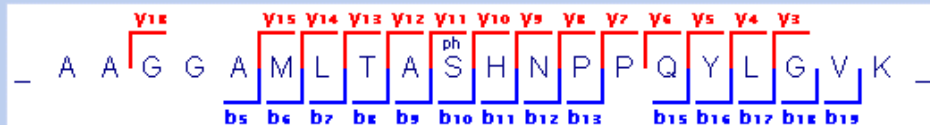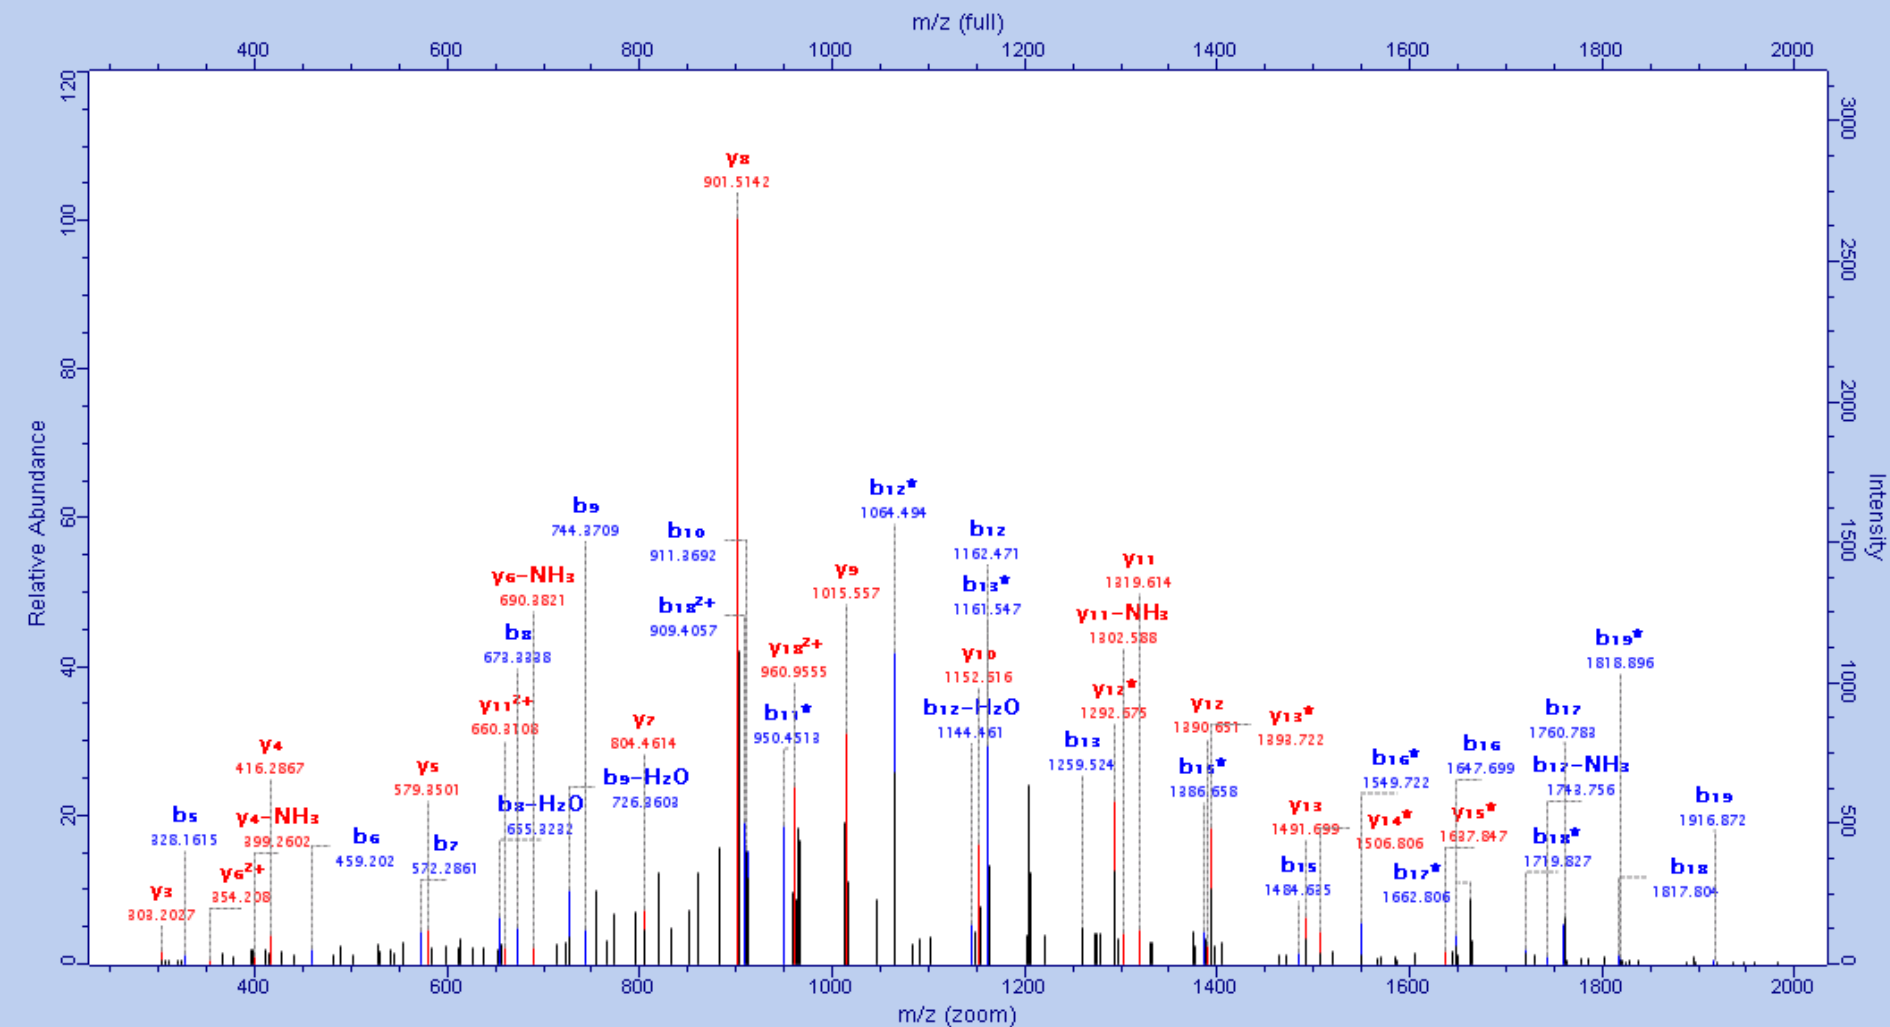

Protein: gil46198599  
Score: 38.39  
Source: service\_HB4  
Scannumber: 3824  
Method: ITMS; CID; 1

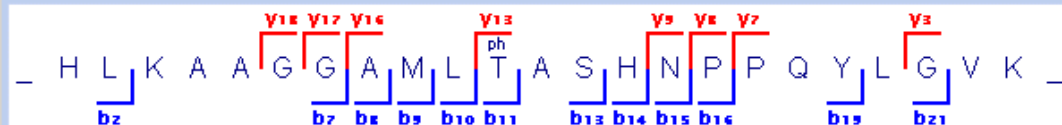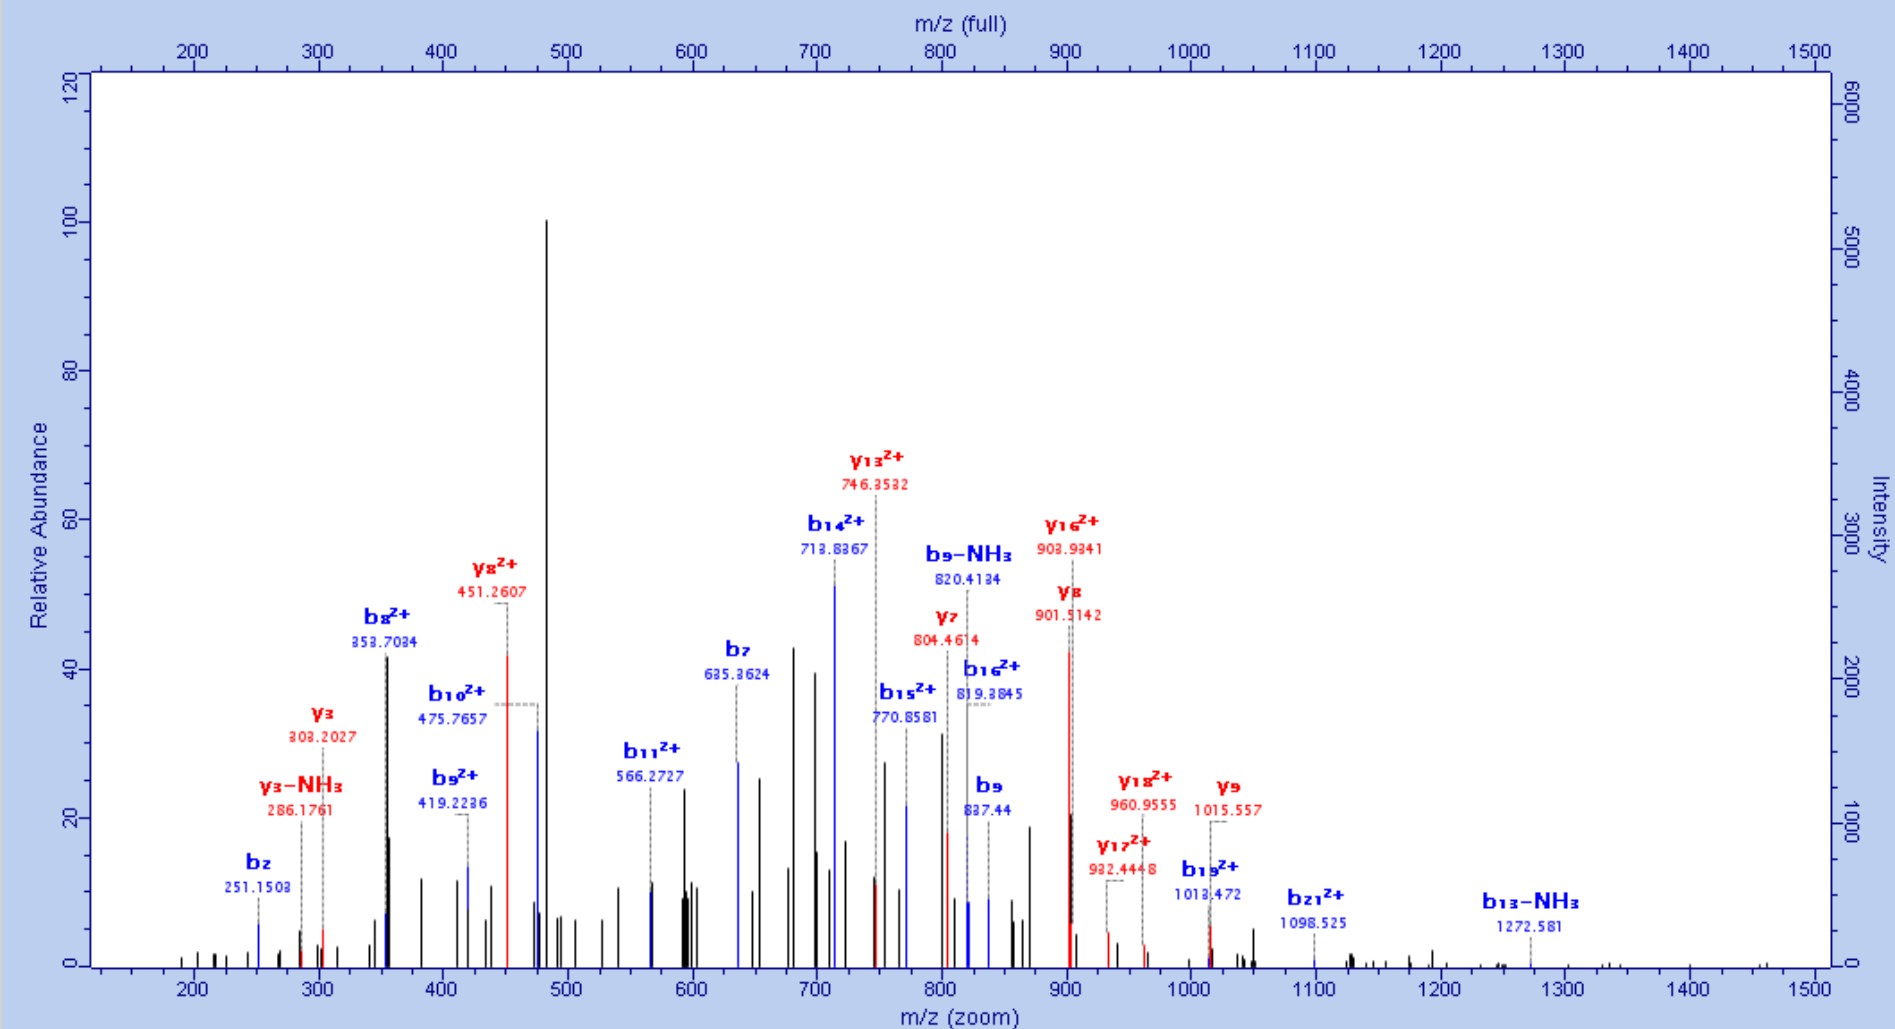



Protein: gil46198676  
 Score: 59.36  
 Source: service\_HB8  
 Scannumber: 3163  
 Method: ITMS; CID; 1

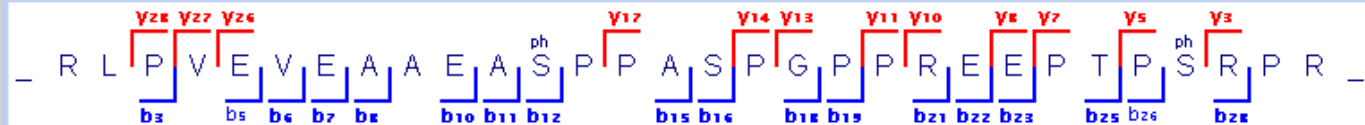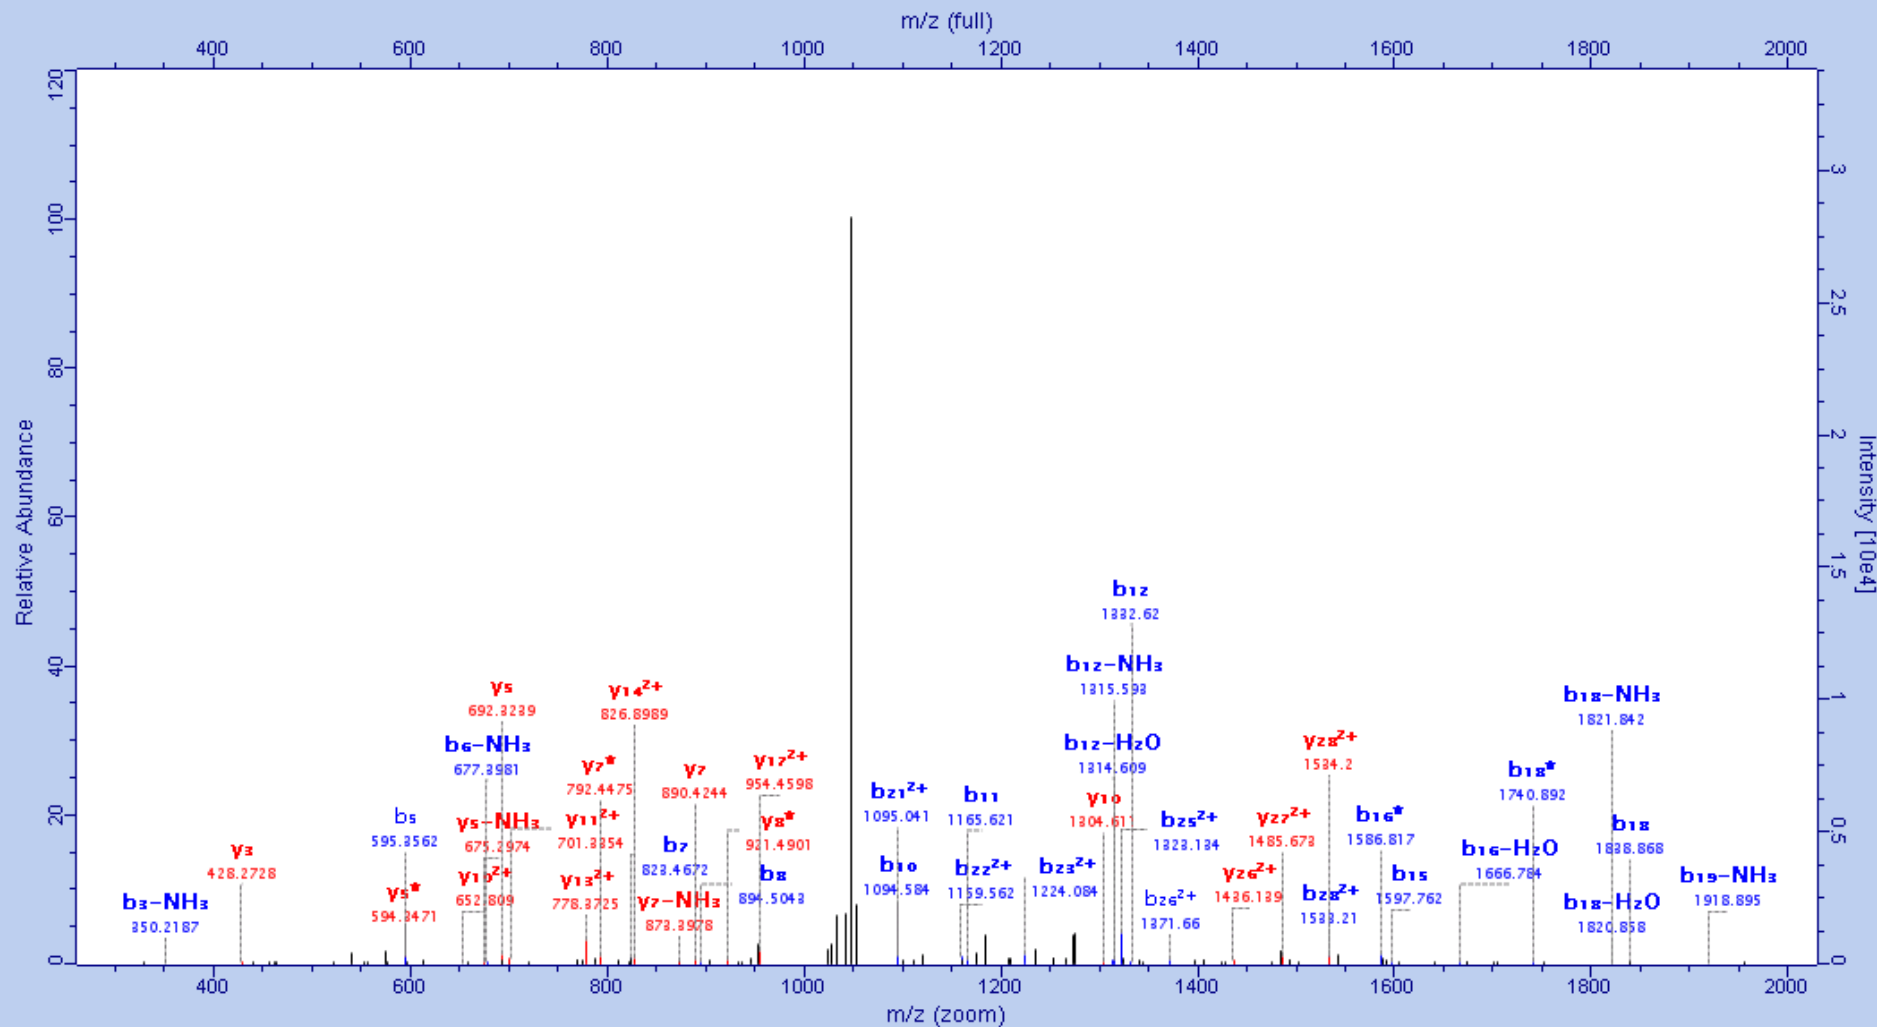

Protein: gil46198676  
 Score: 70.62  
 Source: service\_HB9  
 Scannumber: 3459  
 Method: ITMS; CID; 1

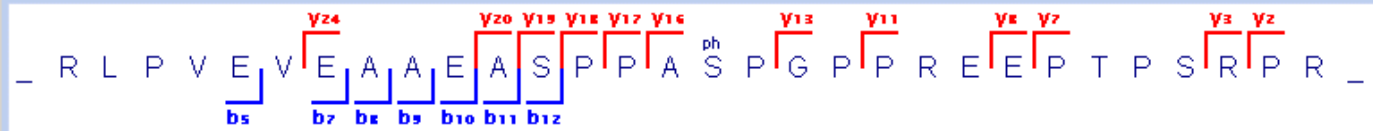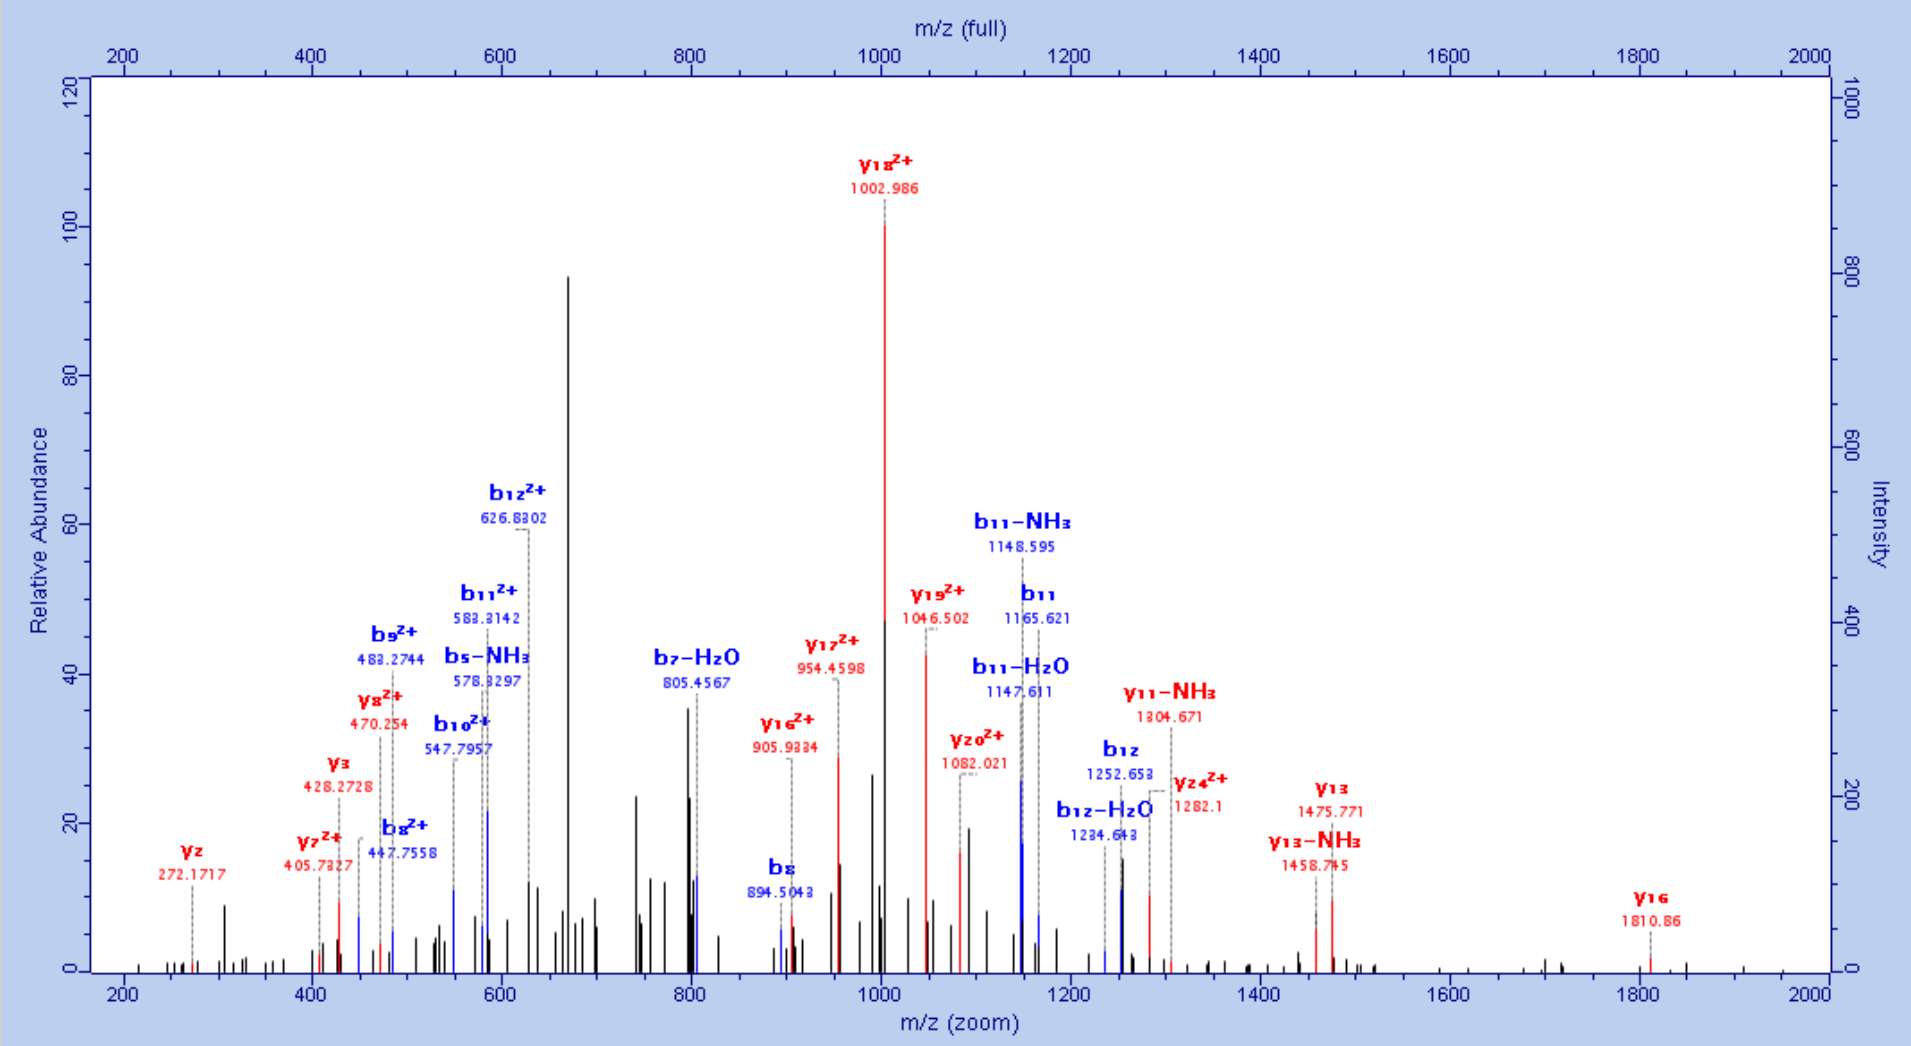



Protein: gil46198676  
 Score: 105.97  
 Source: service\_HB5  
 Scannumber: 3151  
 Method: ITMS; CID; 1

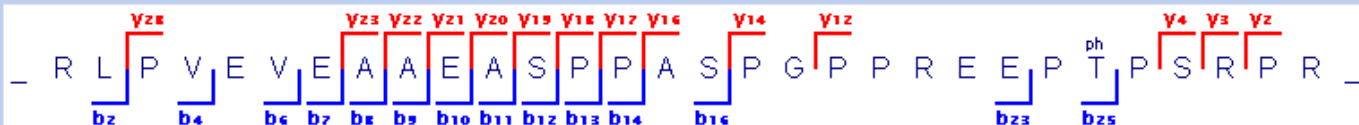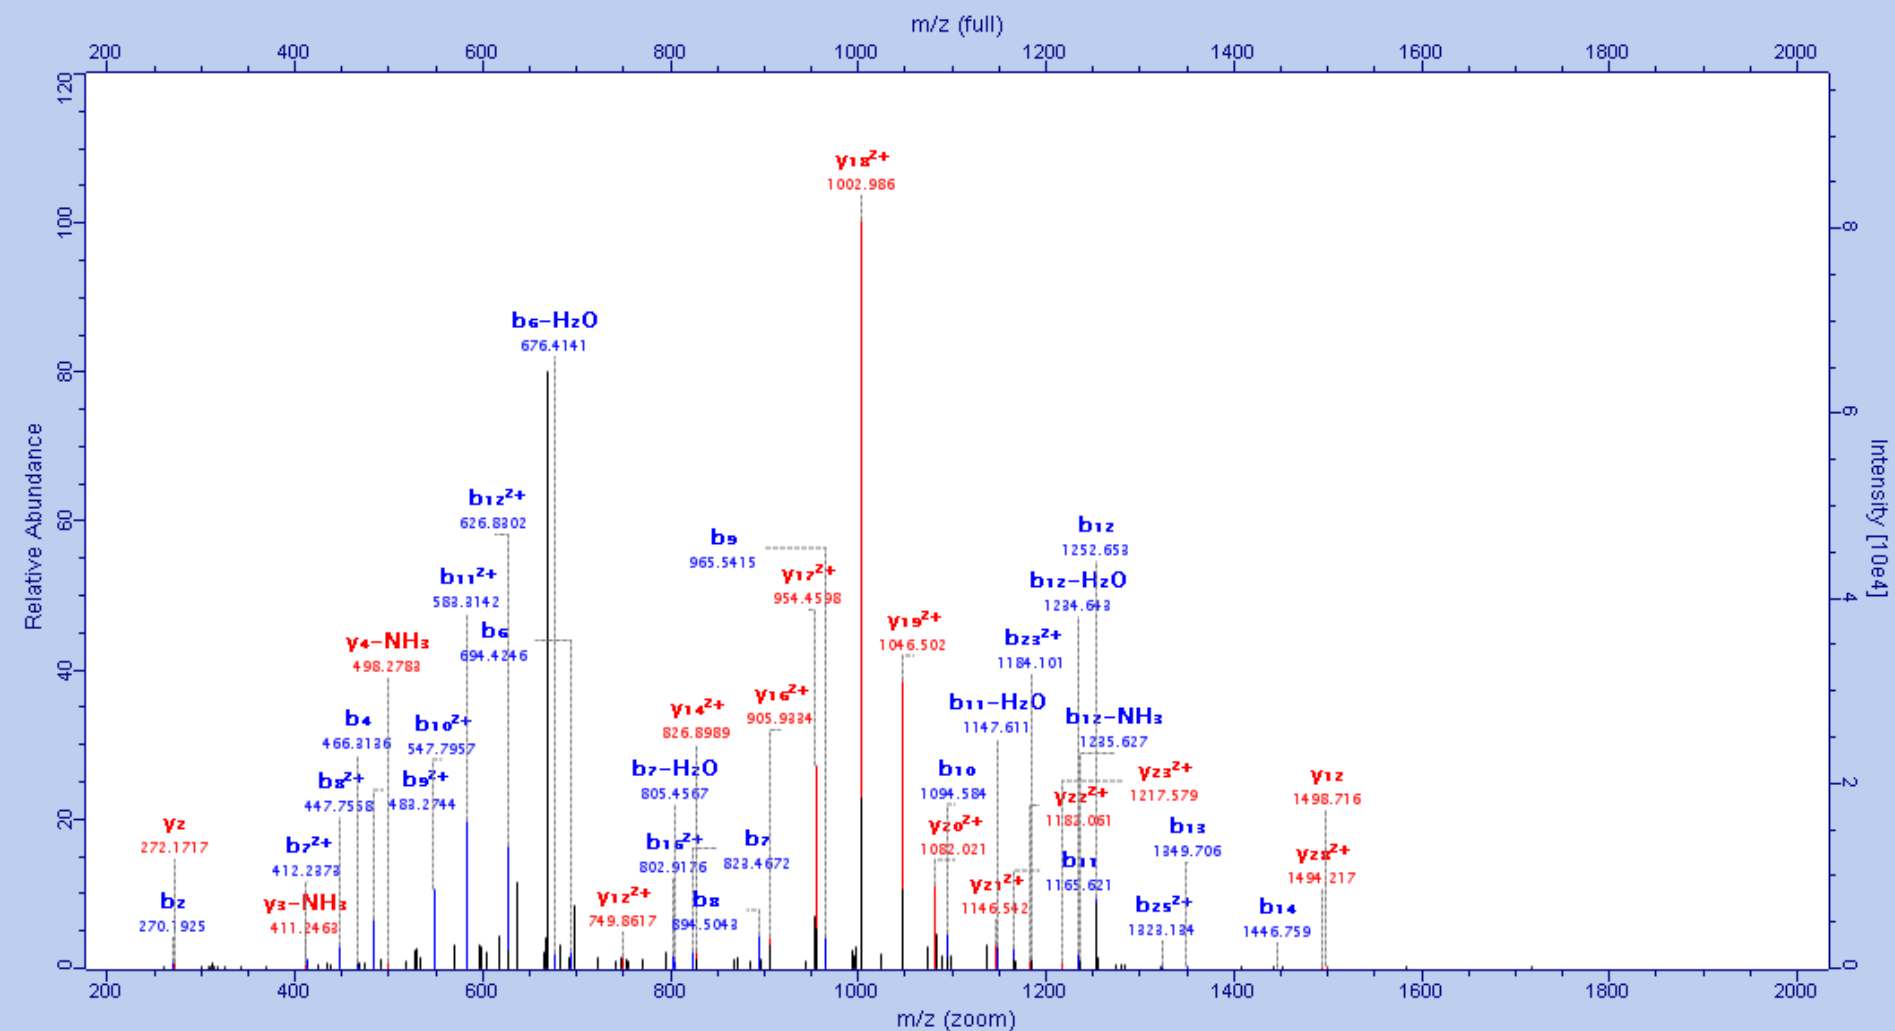

Protein: gil46198716  
 Score: 141.4  
 Source: AWAN-FT\_090928  
 Scannumber: 6395  
 Method: ITMS; CID; 1

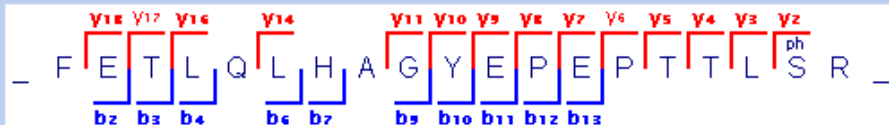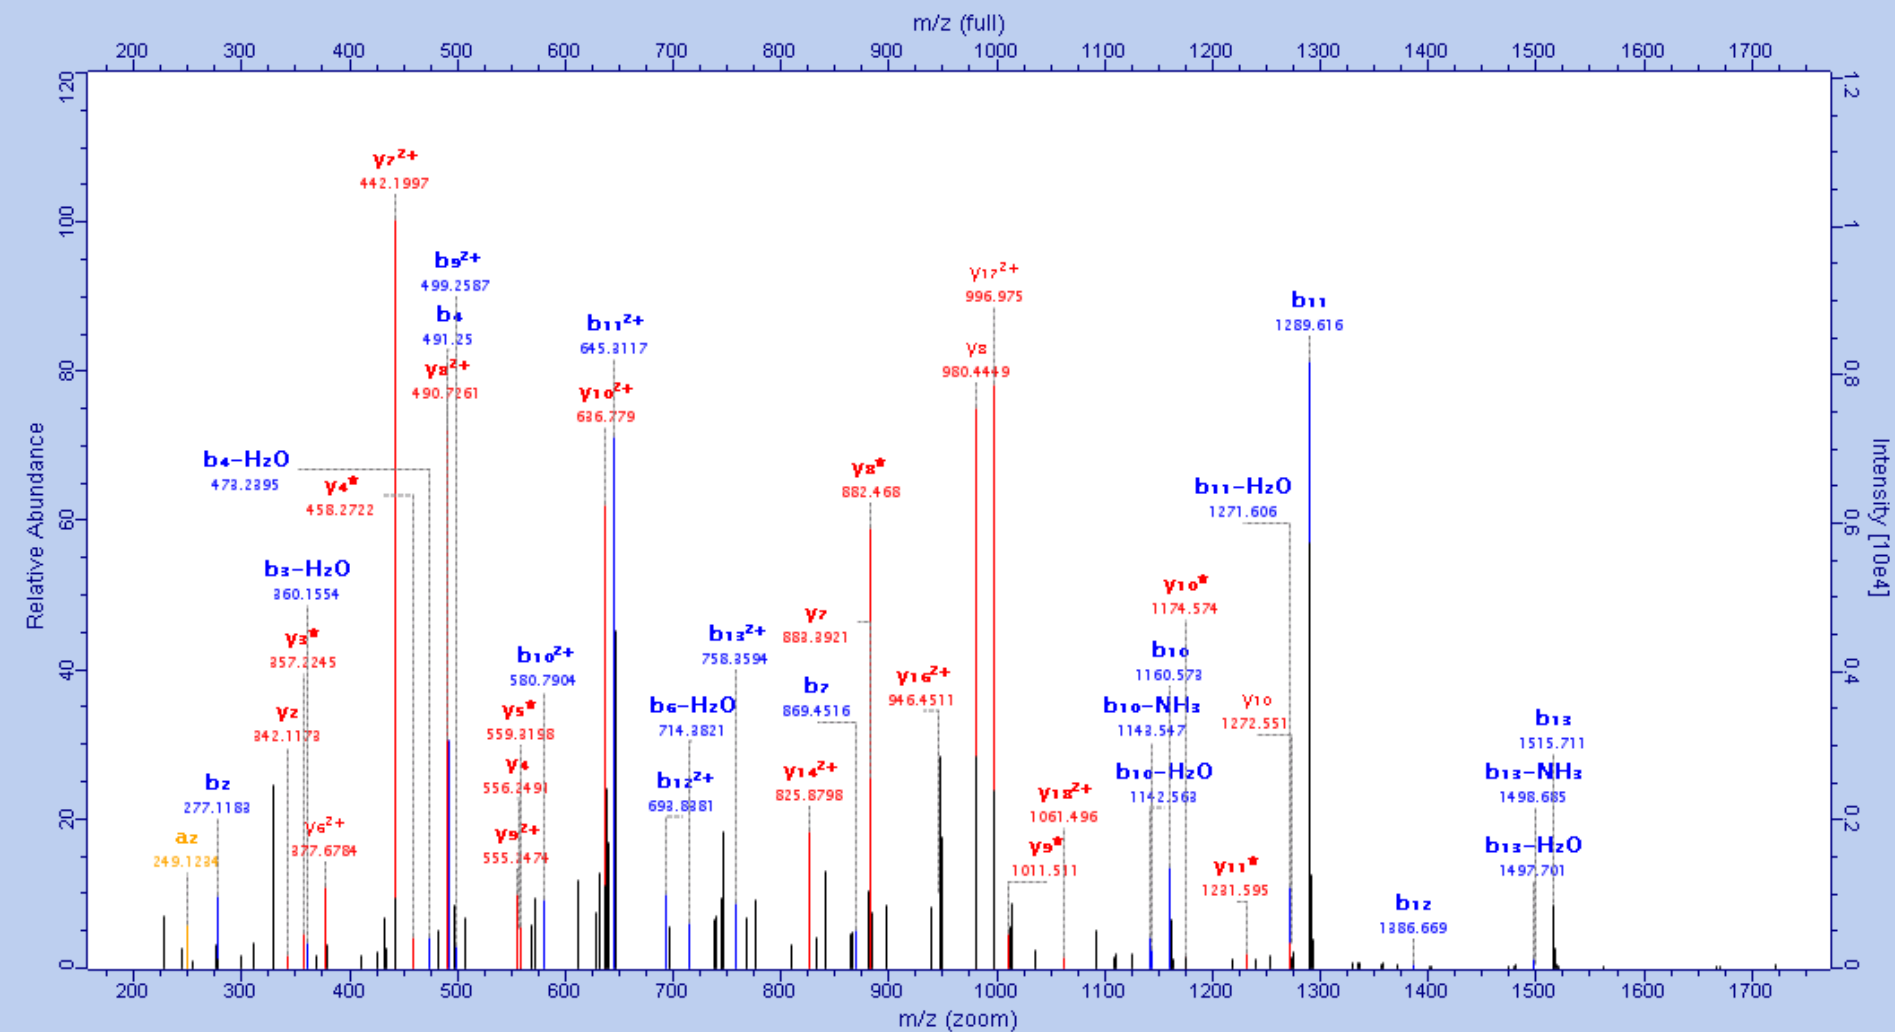

Protein: gil46198861  
Score: 30.83  
Source: service\_HB3  
Scannumber: 3720  
Method: ITMS; CID; 1

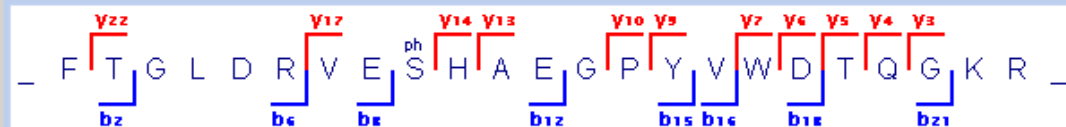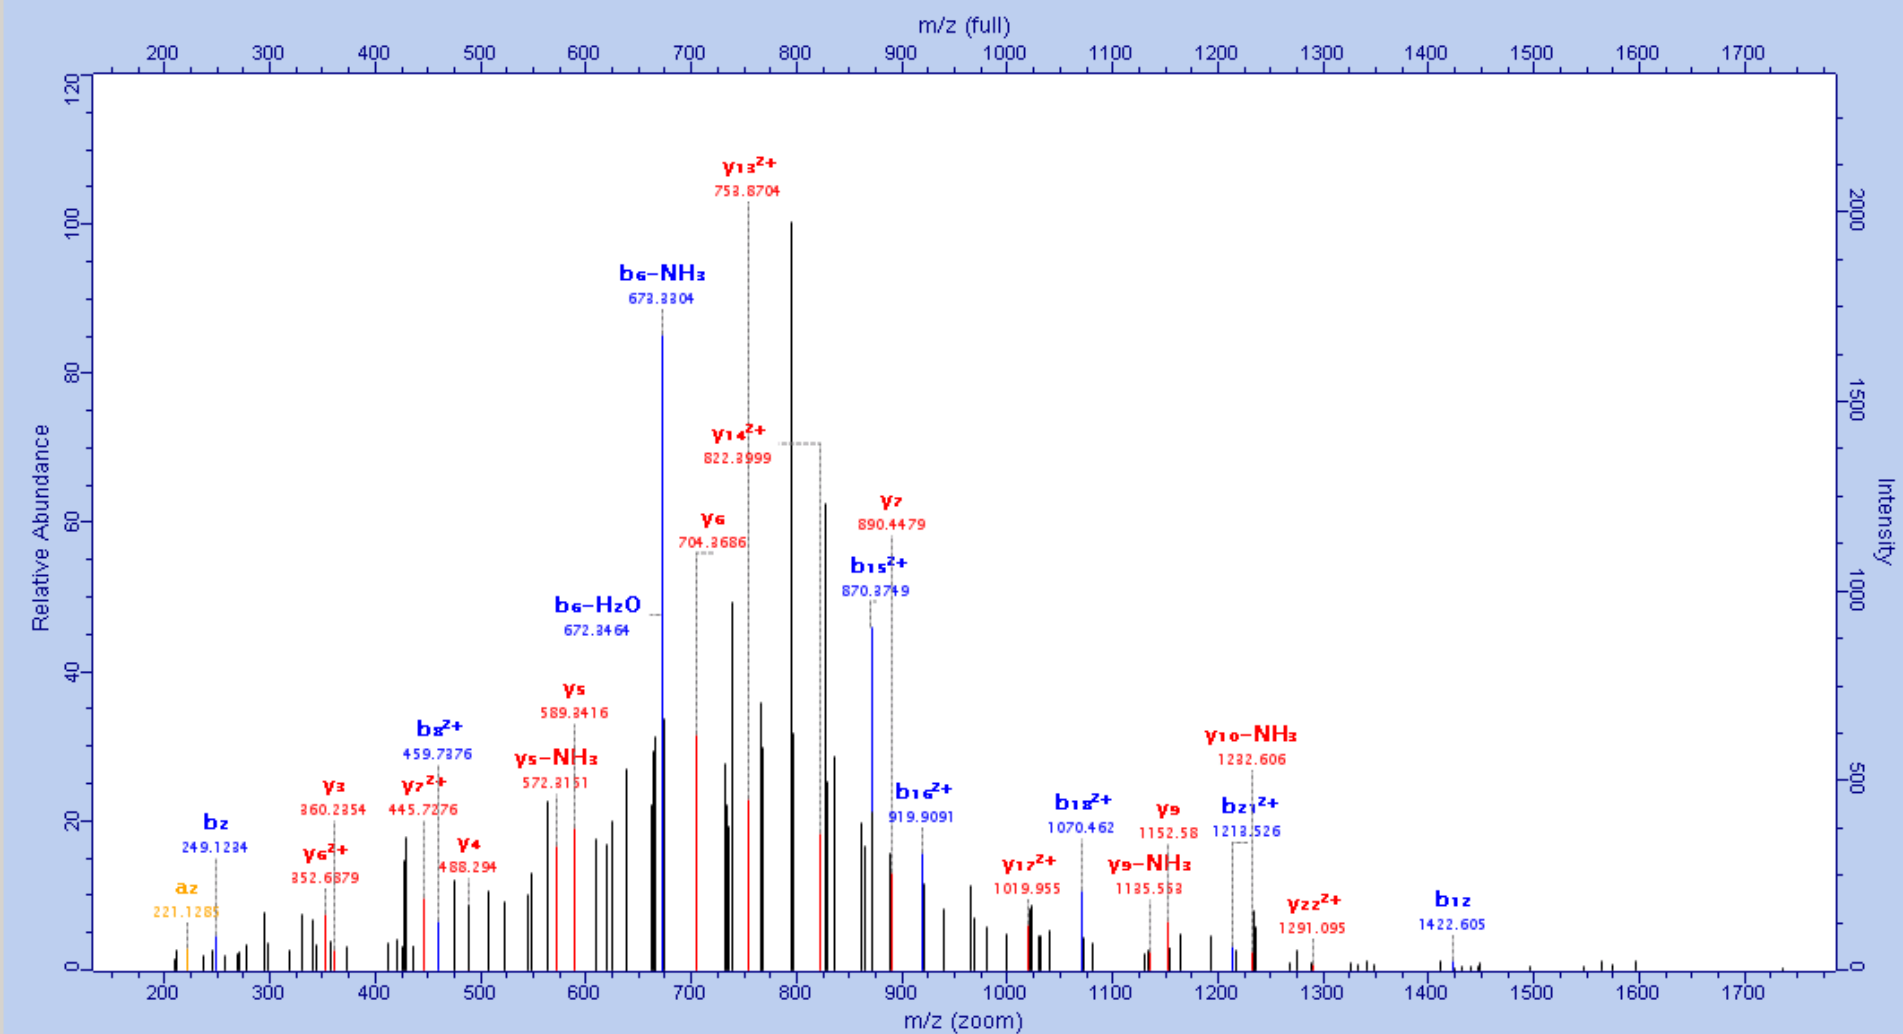

Protein: gil46198999  
Score: 43.33  
Source: AWAN-19-21\_090928  
Scannumber: 4573  
Method: ITMS; CID; 1

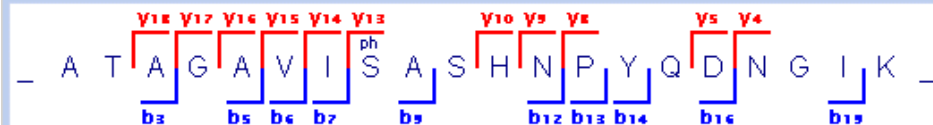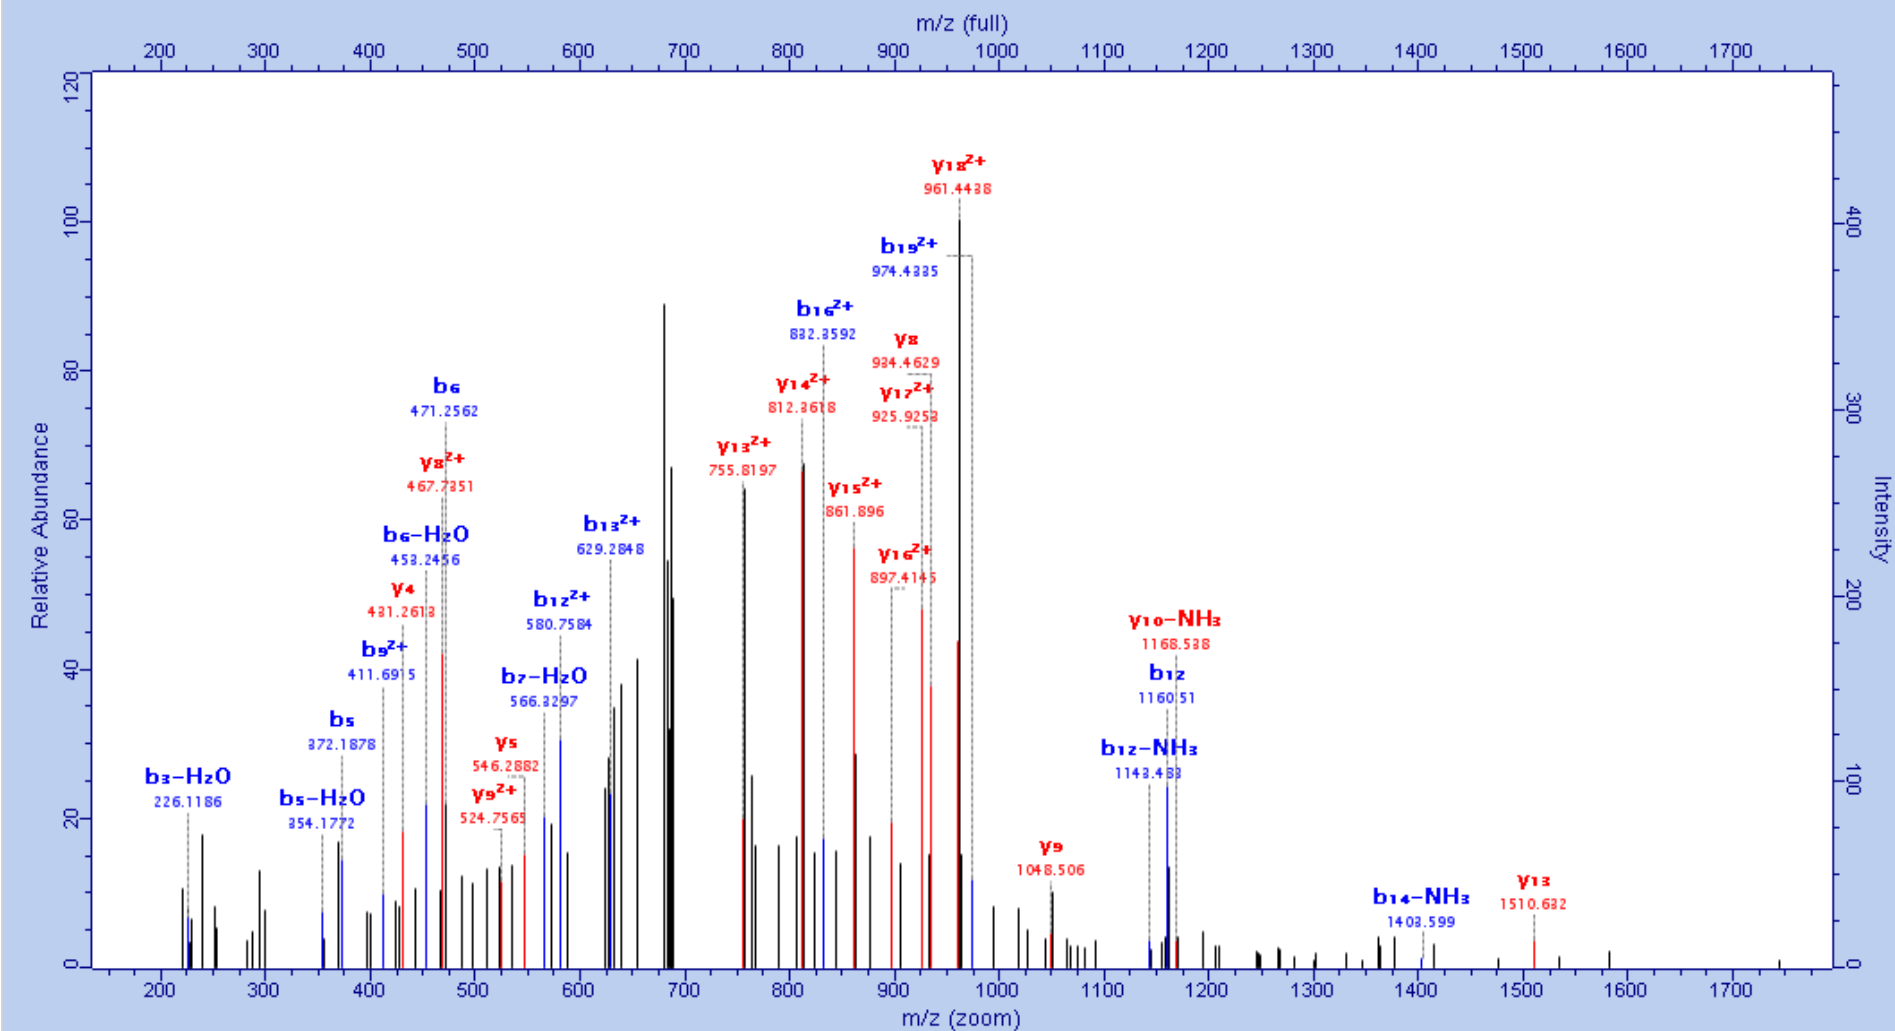

Protein: gil46198999  
 Score: 181.52  
 Source: AWAN-FT\_D90928  
 Scannumber: 4697  
 Method: ITMS; CID; 1

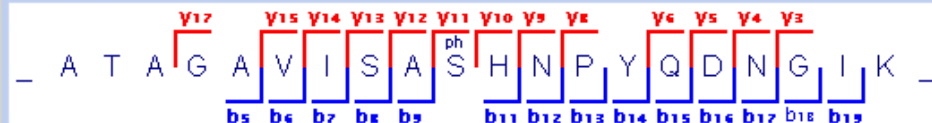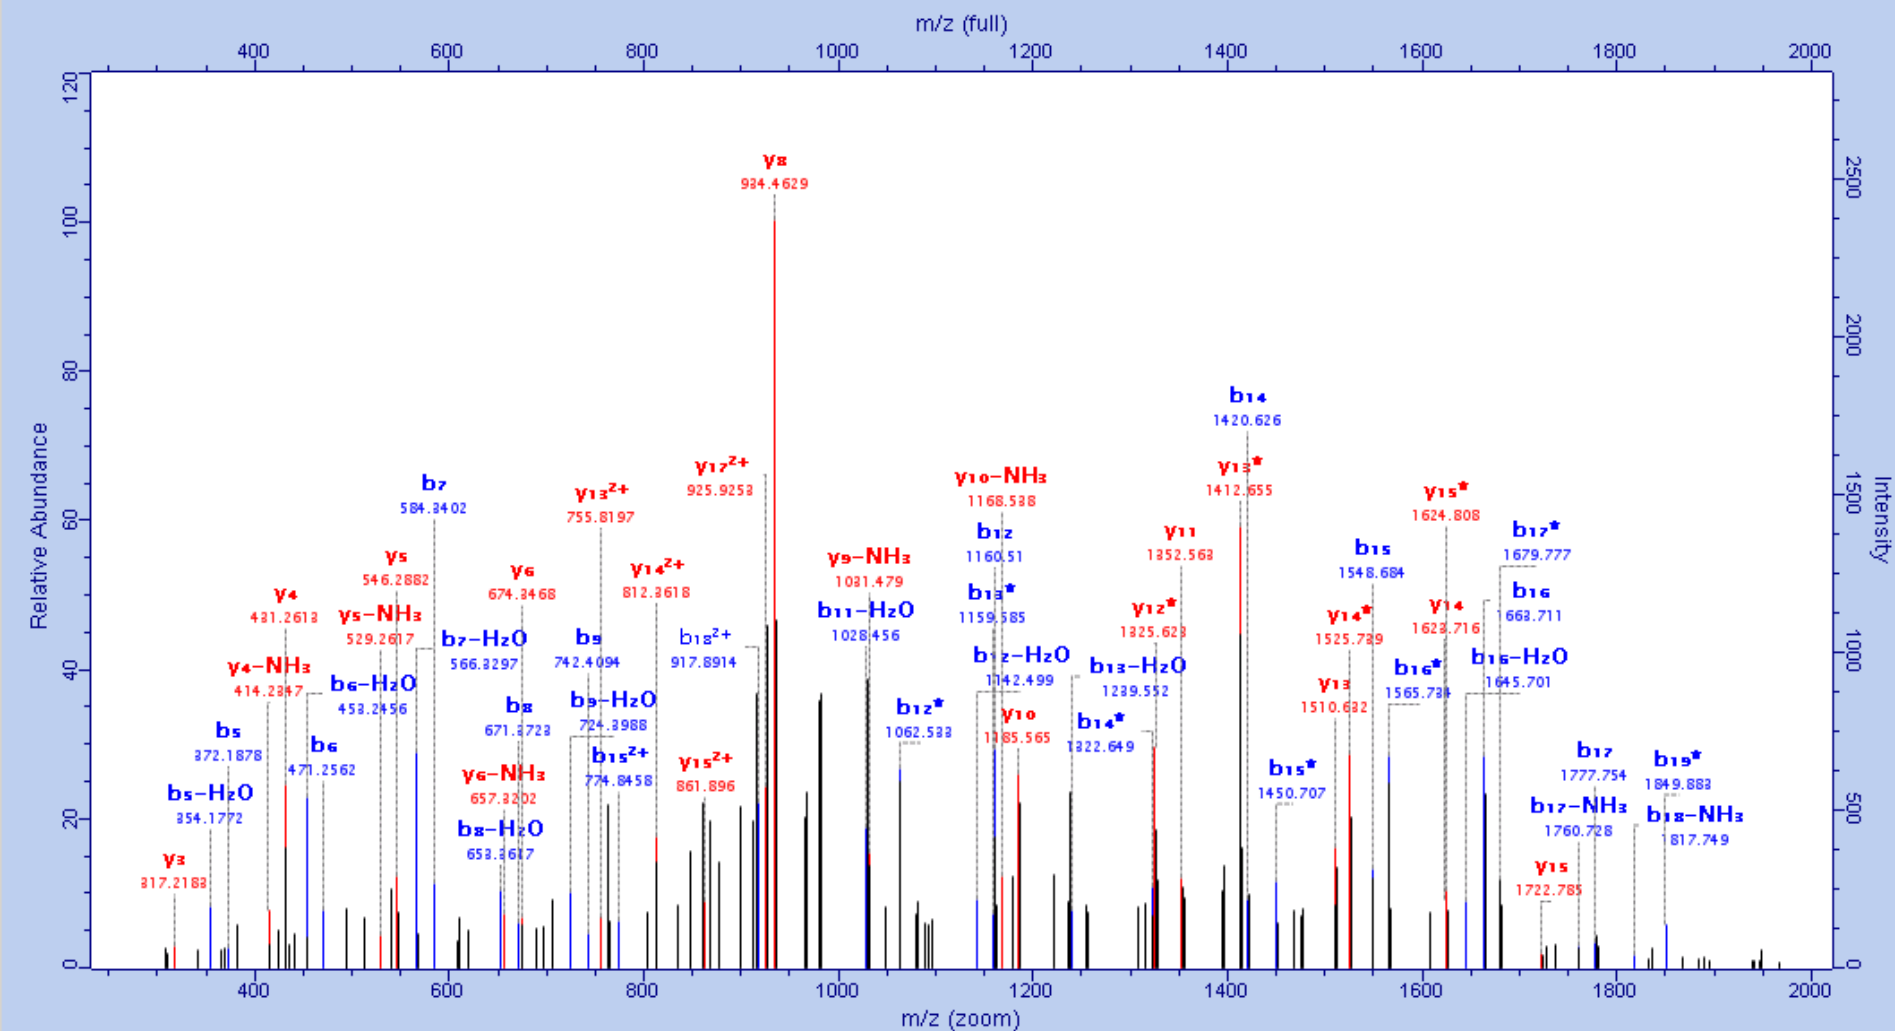

Protein: gil46198999  
 Score: 100.25  
 Source: service\_HB4  
 Scannumber: 4340  
 Method: ITMS; CID; 1

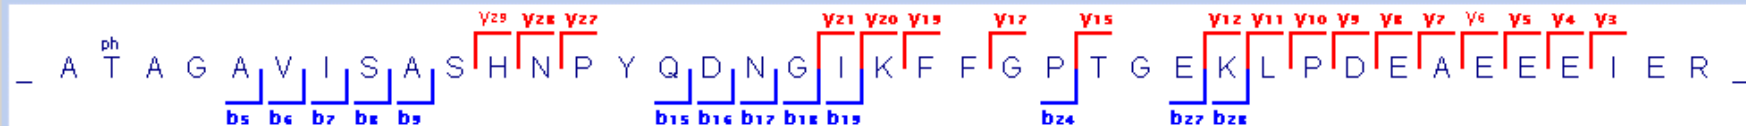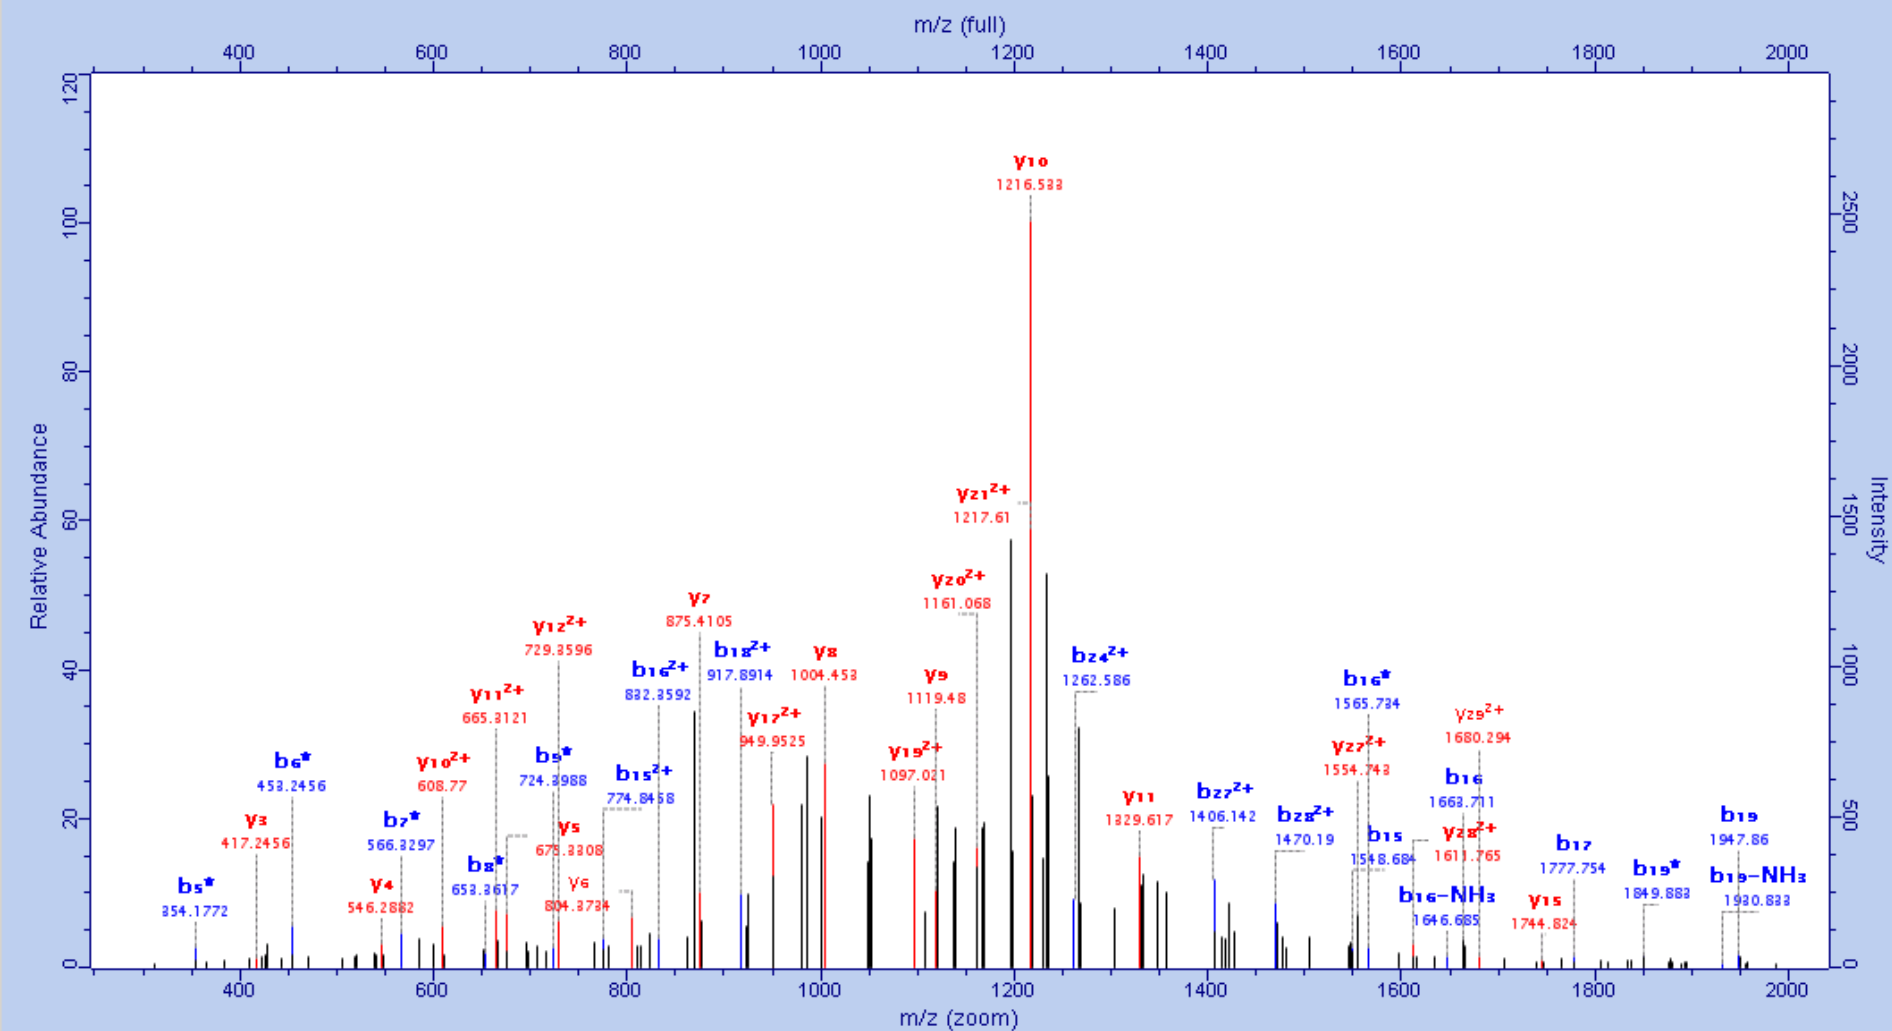

Protein: gil46198999  
Score: 3.86  
Source: AWAN-FT\_D90928  
Scannumber: 4907  
Method: ITMS; CID; 1

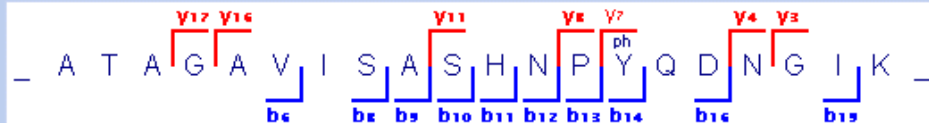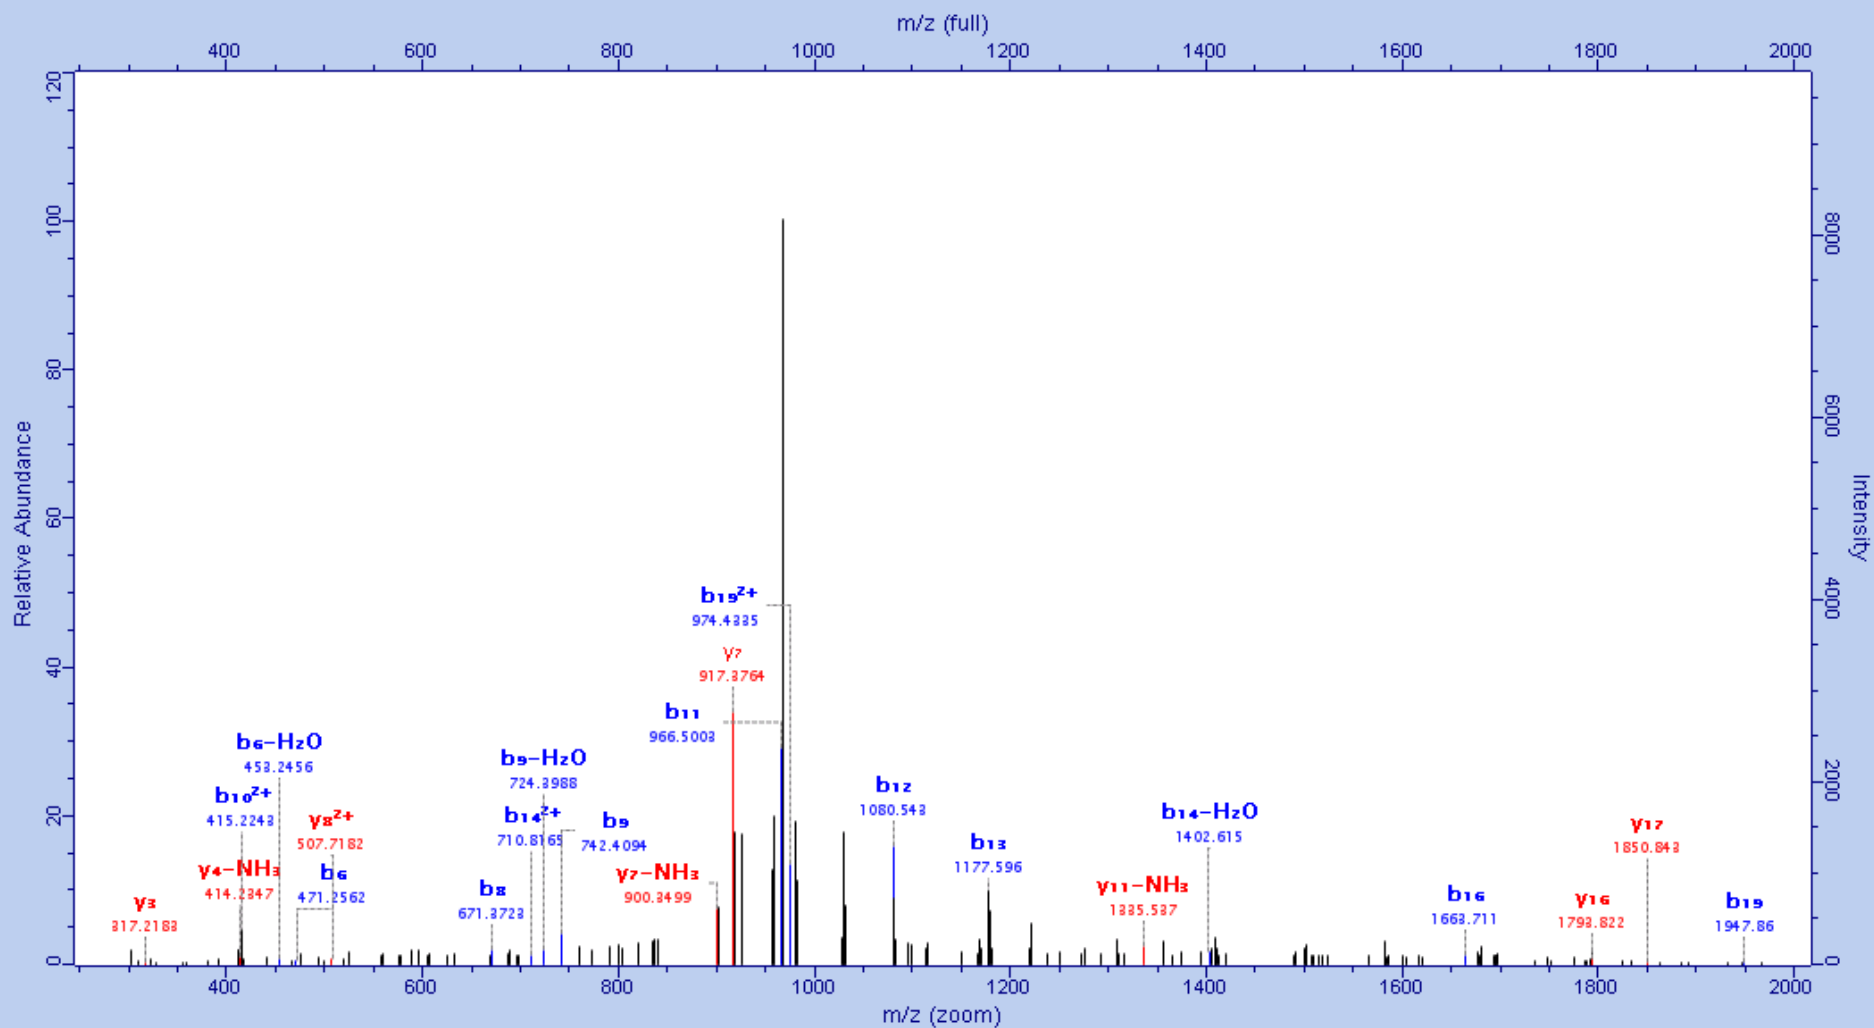

Protein: gj1461.99039  
 Score: 149.51  
 Source: AWAN-FT\_090928  
 Scannumber: 2147  
 Method: ITMS; CID; 1

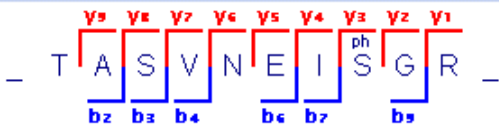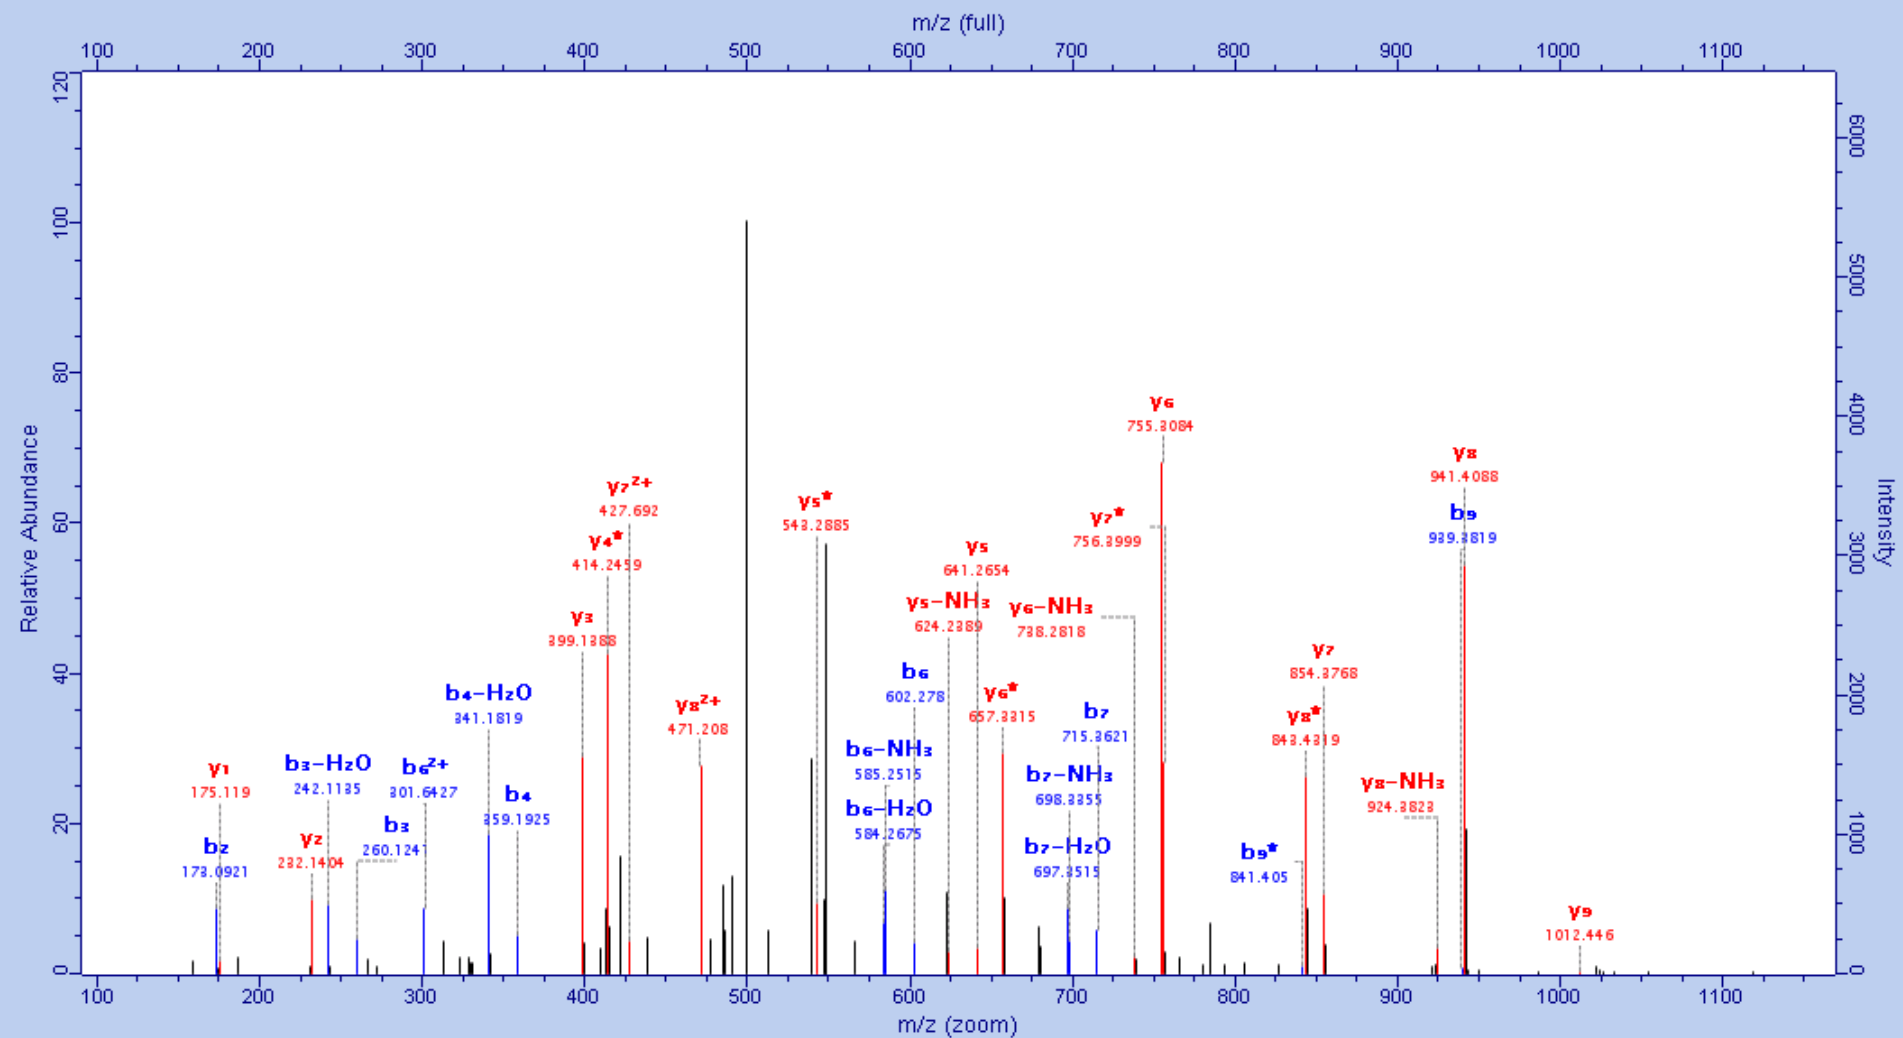



Protein: gil46199083  
Score: 170.04  
Source: AWAN-FT\_D90928  
Scannumber: 5576  
Method: ITMS; CID; 1

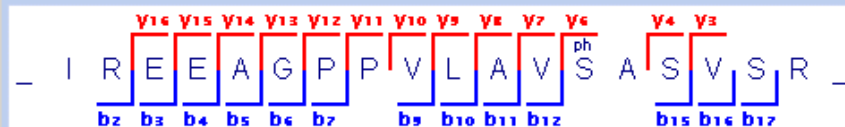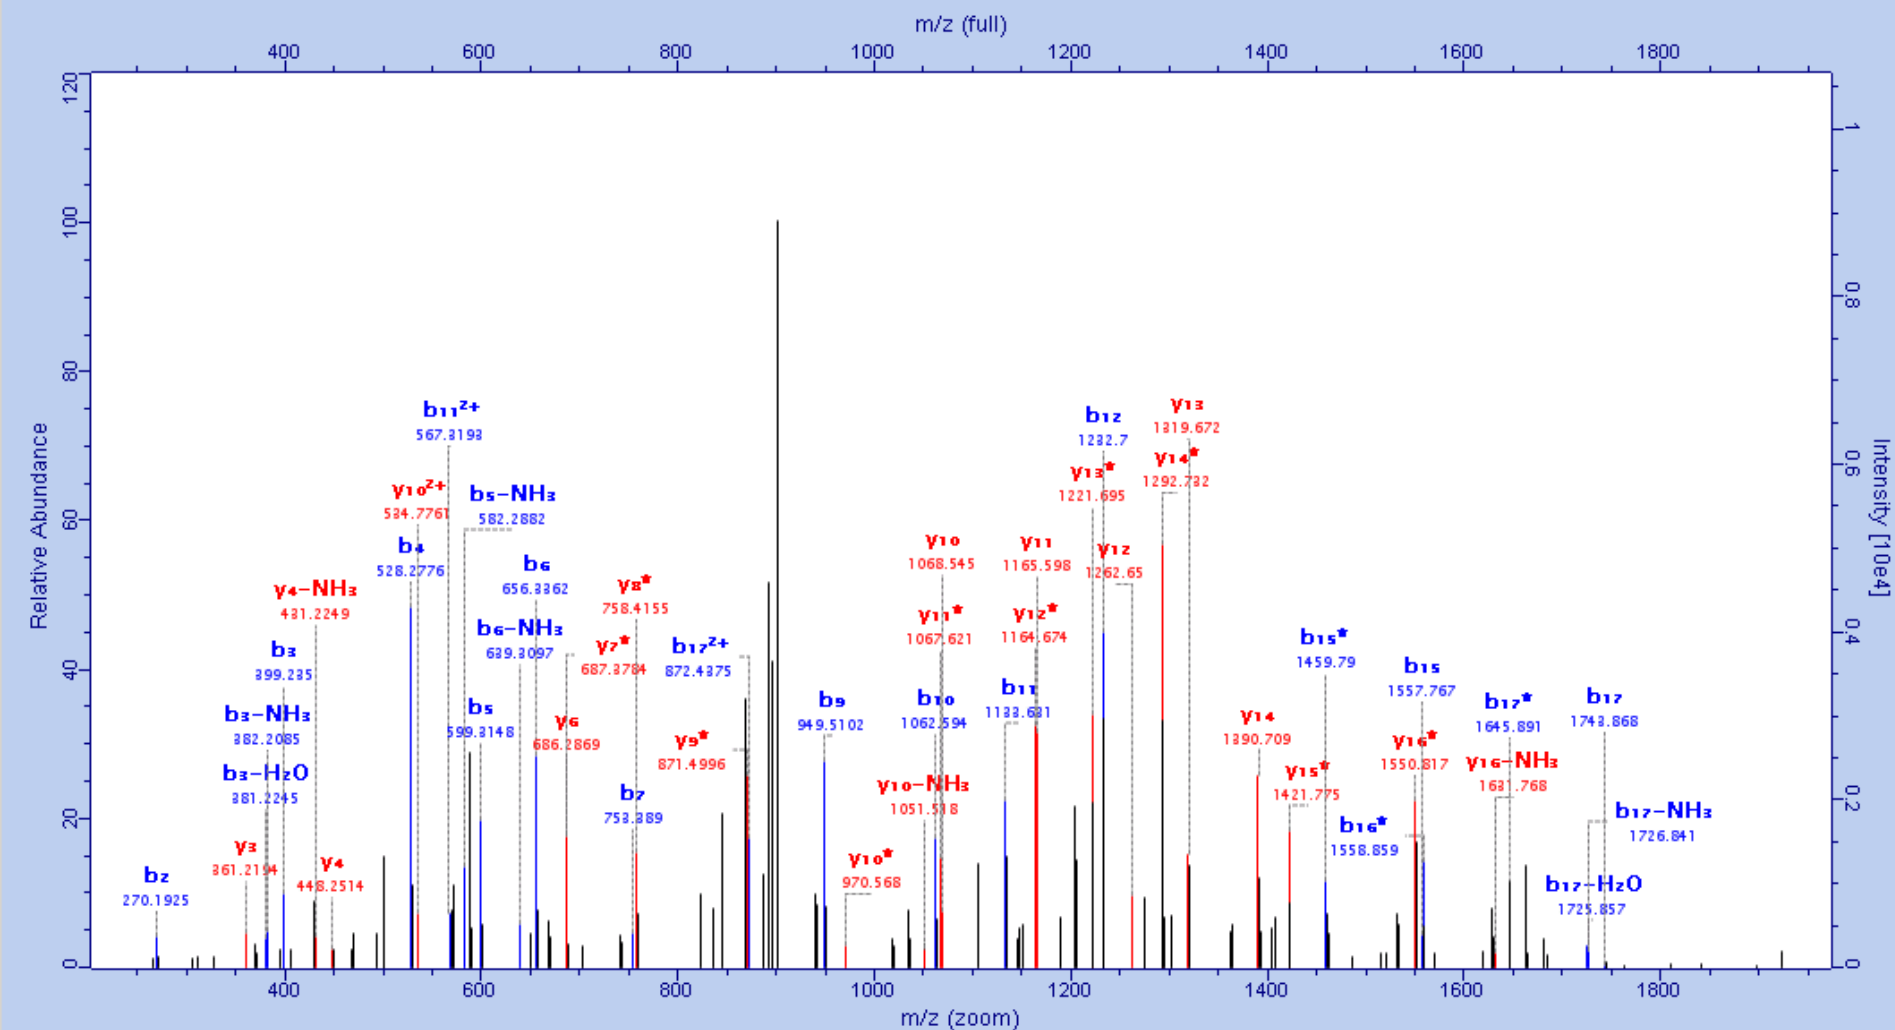

Protein: gil46199083  
 Score: 216.7  
 Source: AWAN-FT\_D90928  
 Scannumber: 5639  
 Method: ITMS; CID; 1

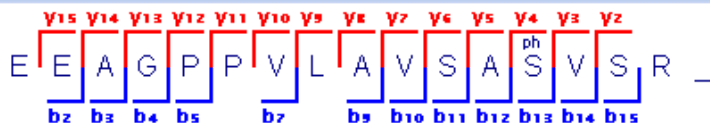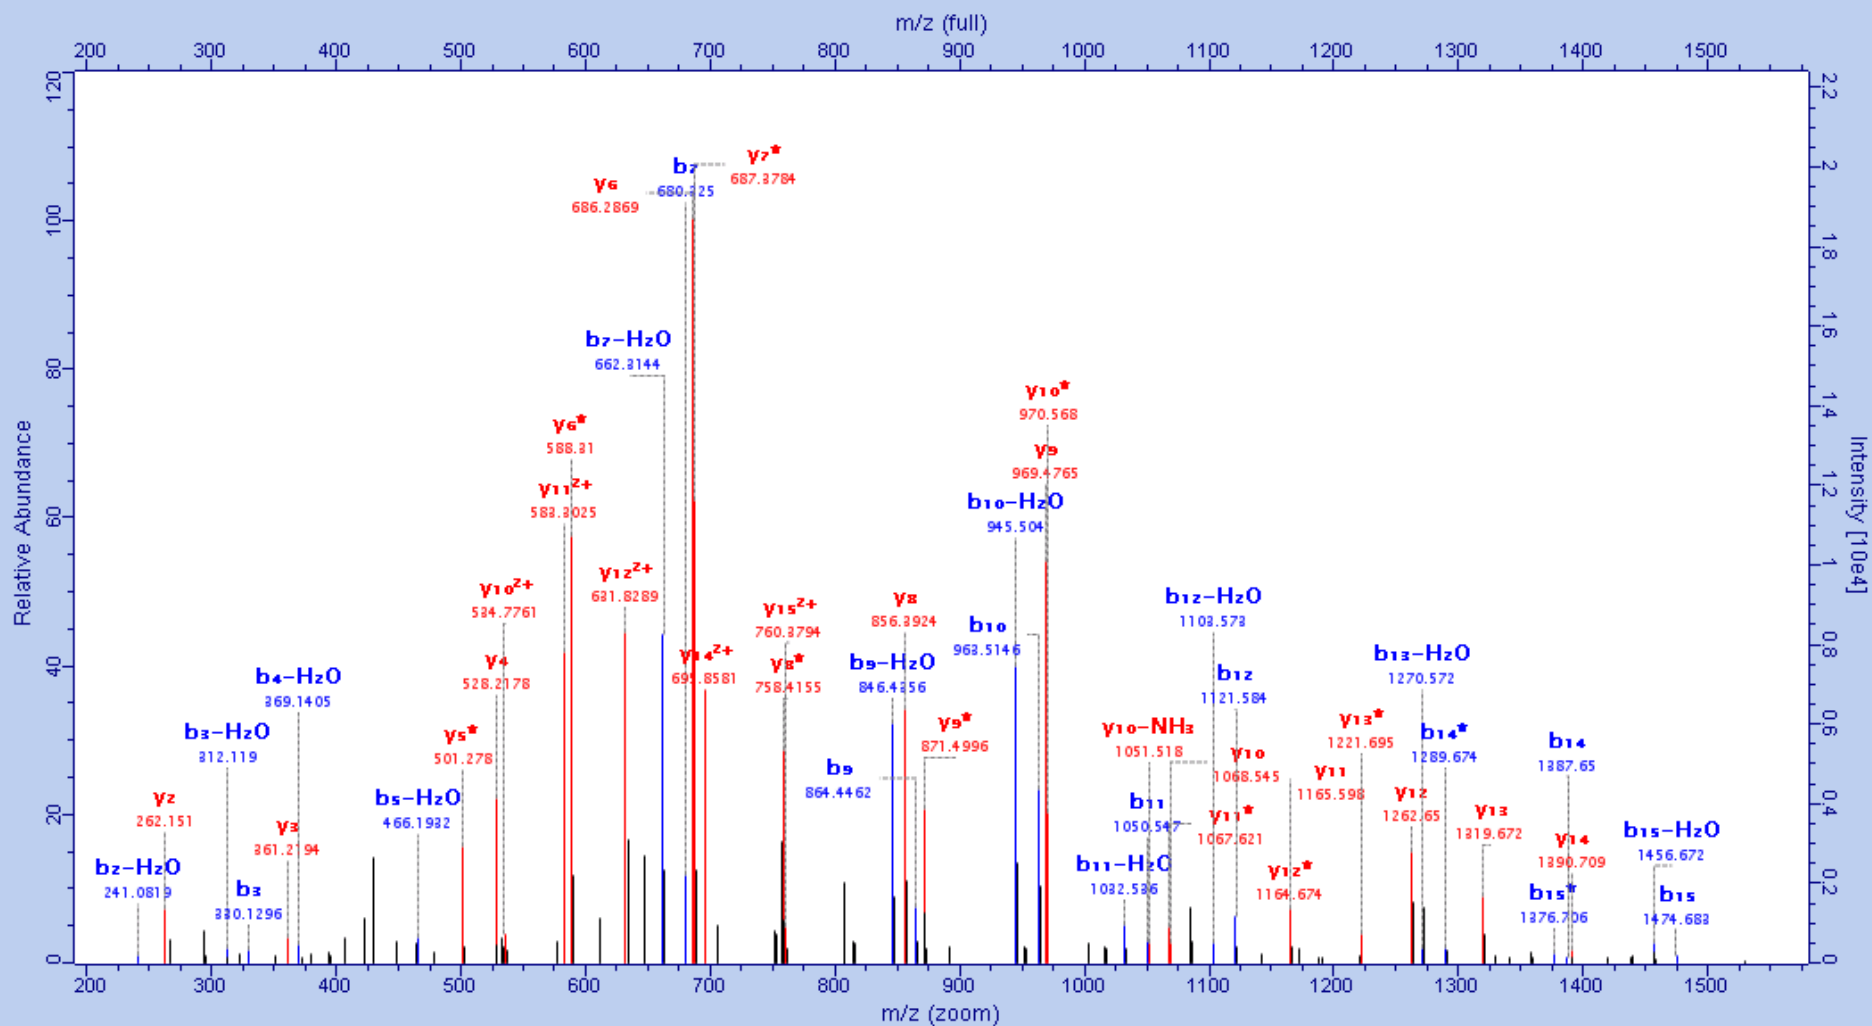

Protein: gi146199083  
 Score: 156.23  
 Source: AWAN-FT\_090928  
 Scannumber: 5655  
 Method: ITMS; CID; 1

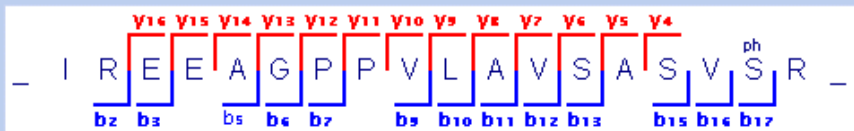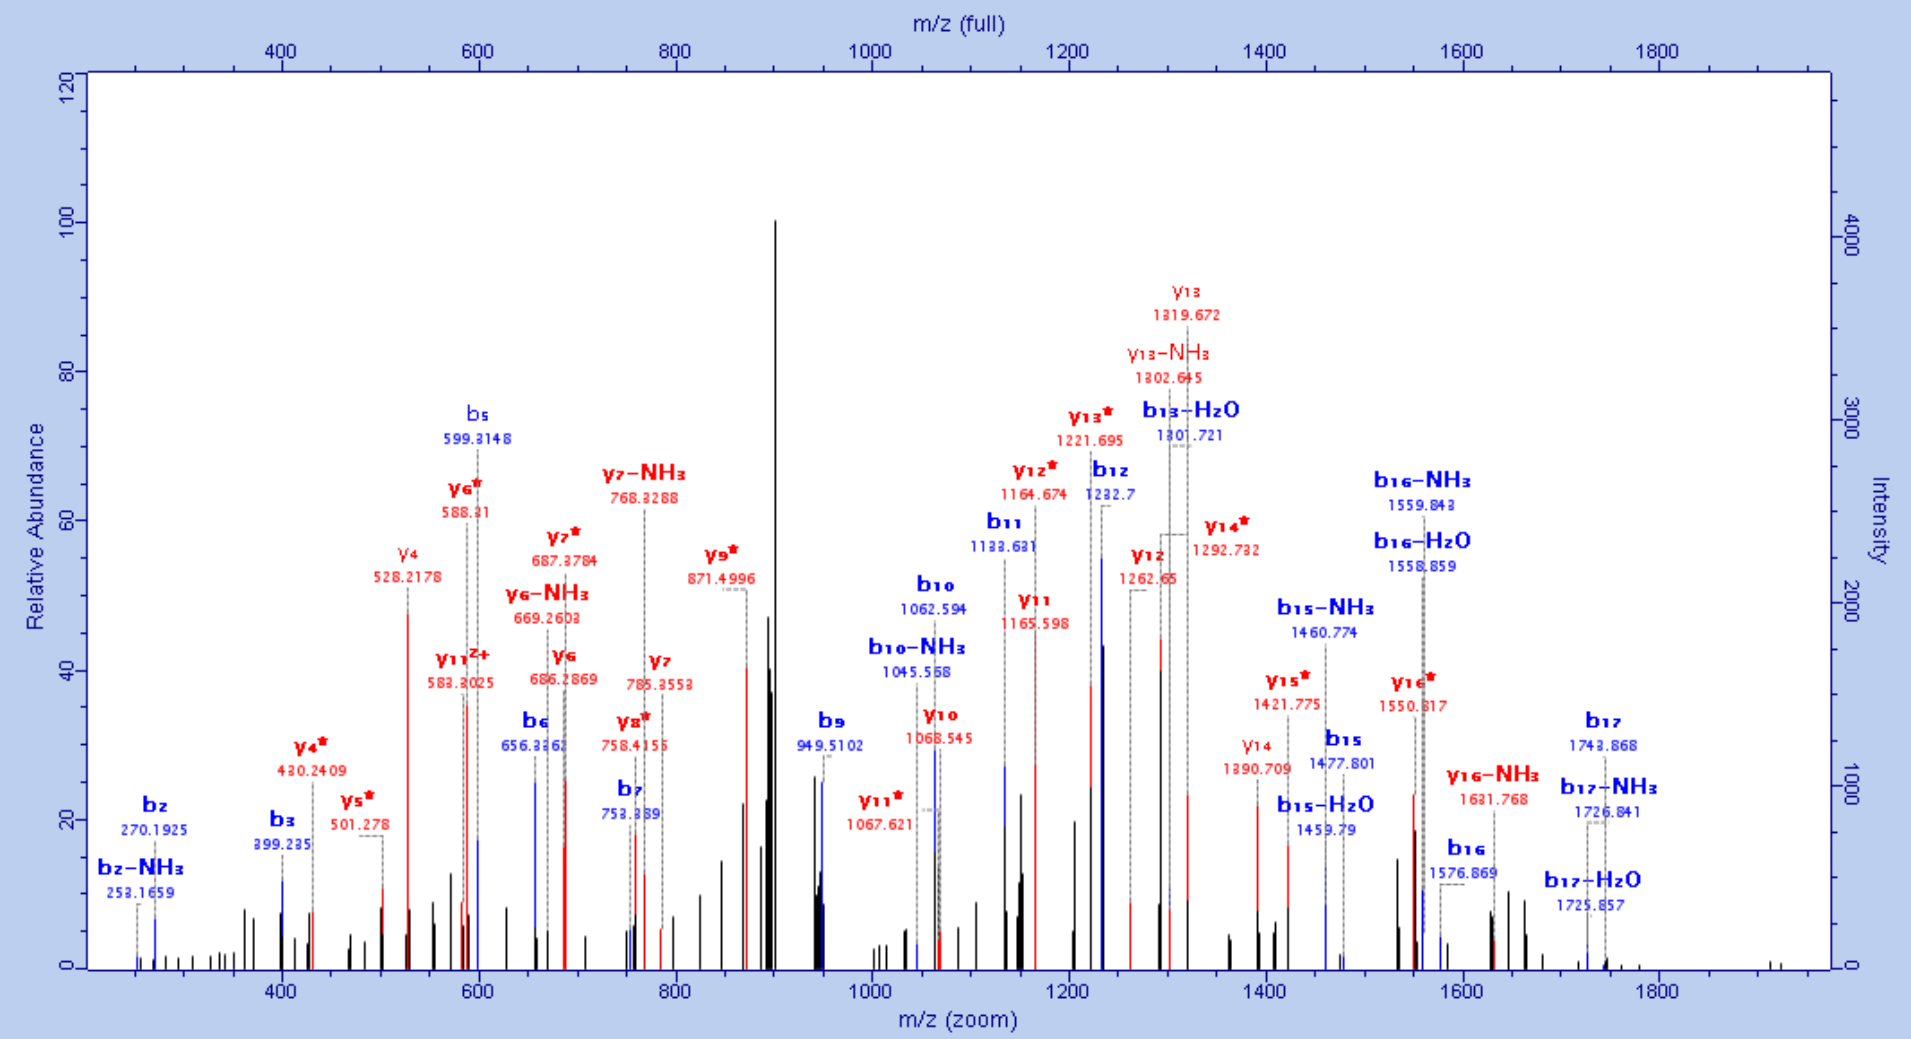

Protein: gil46199106  
 Score: 93.68  
 Source: AWAN-FT\_090928  
 Scannumber: 6385  
 Method: ITMS; CID; 1

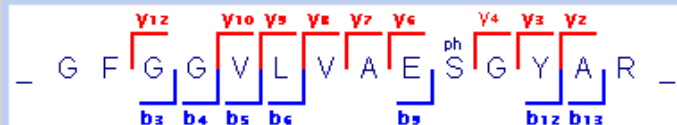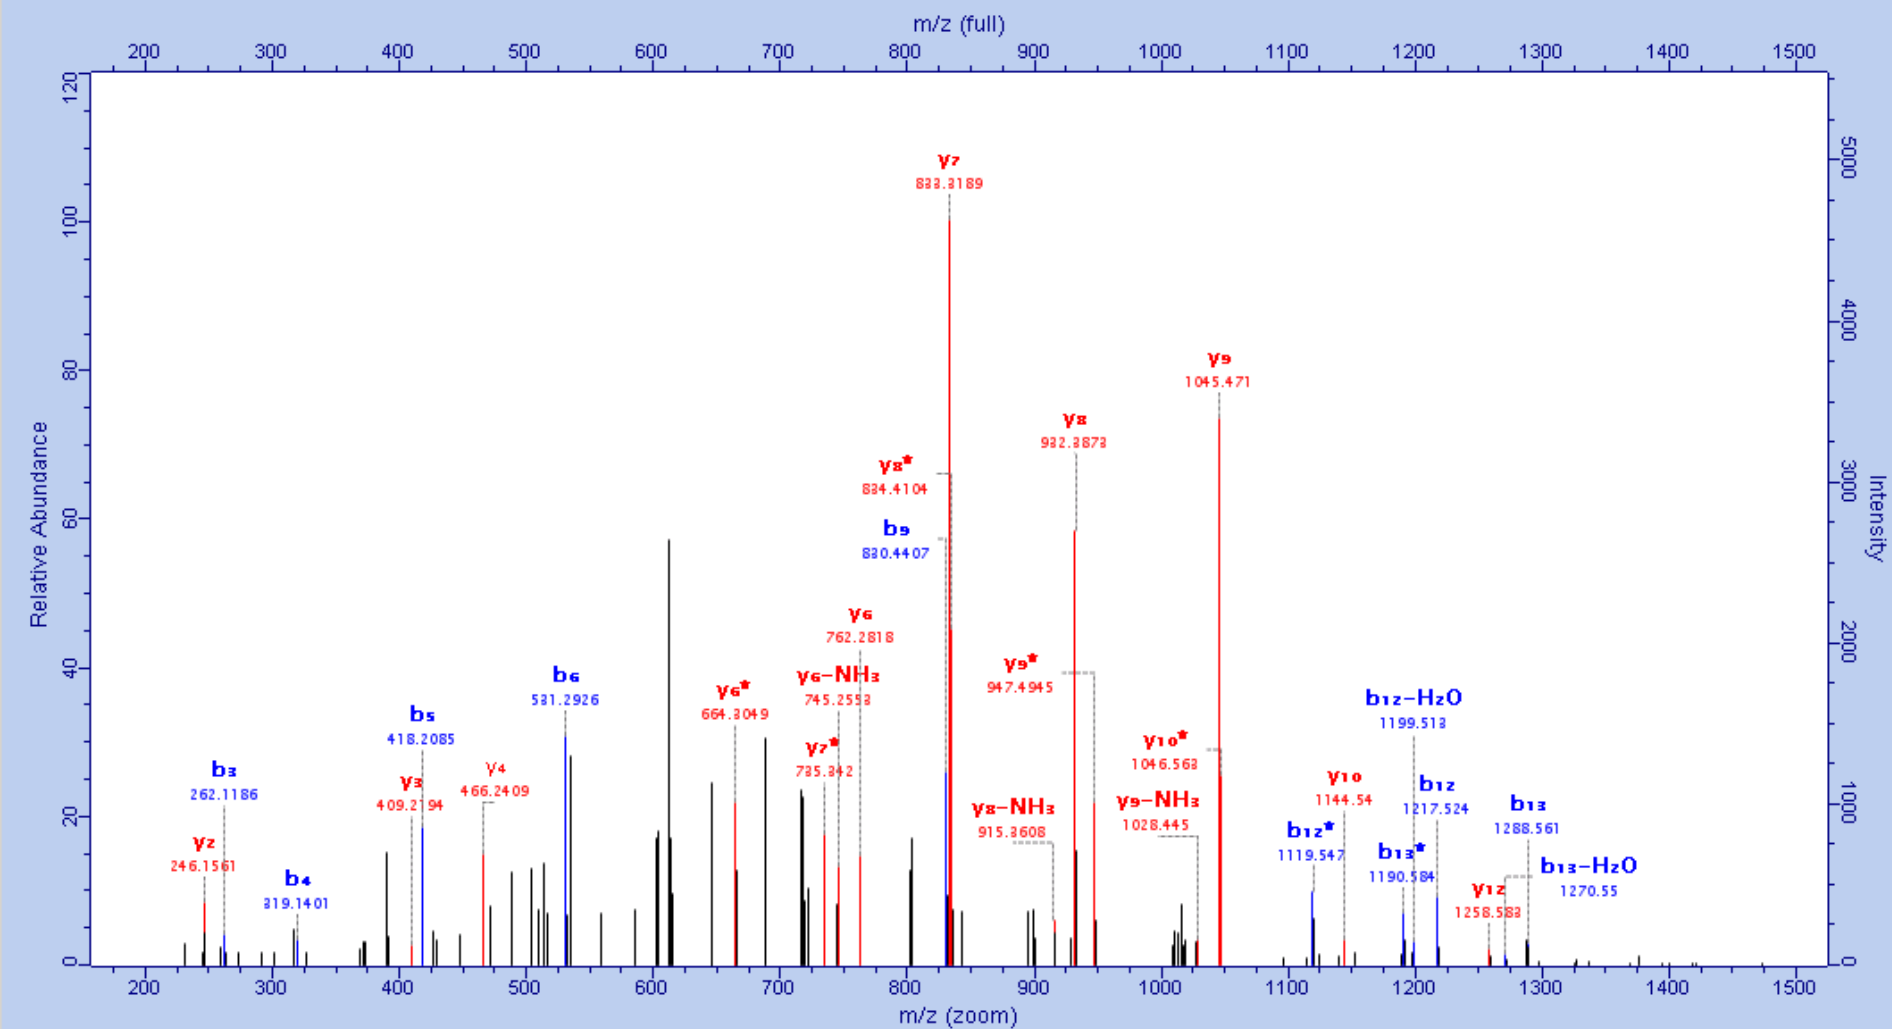

Protein: gil46199106  
 Score: 39.69  
 Source: service\_HB11  
 Scannumber: 1848  
 Method: ITMS; CID; 1

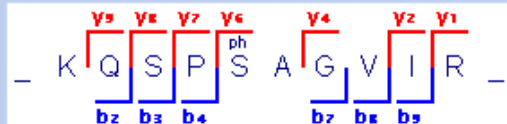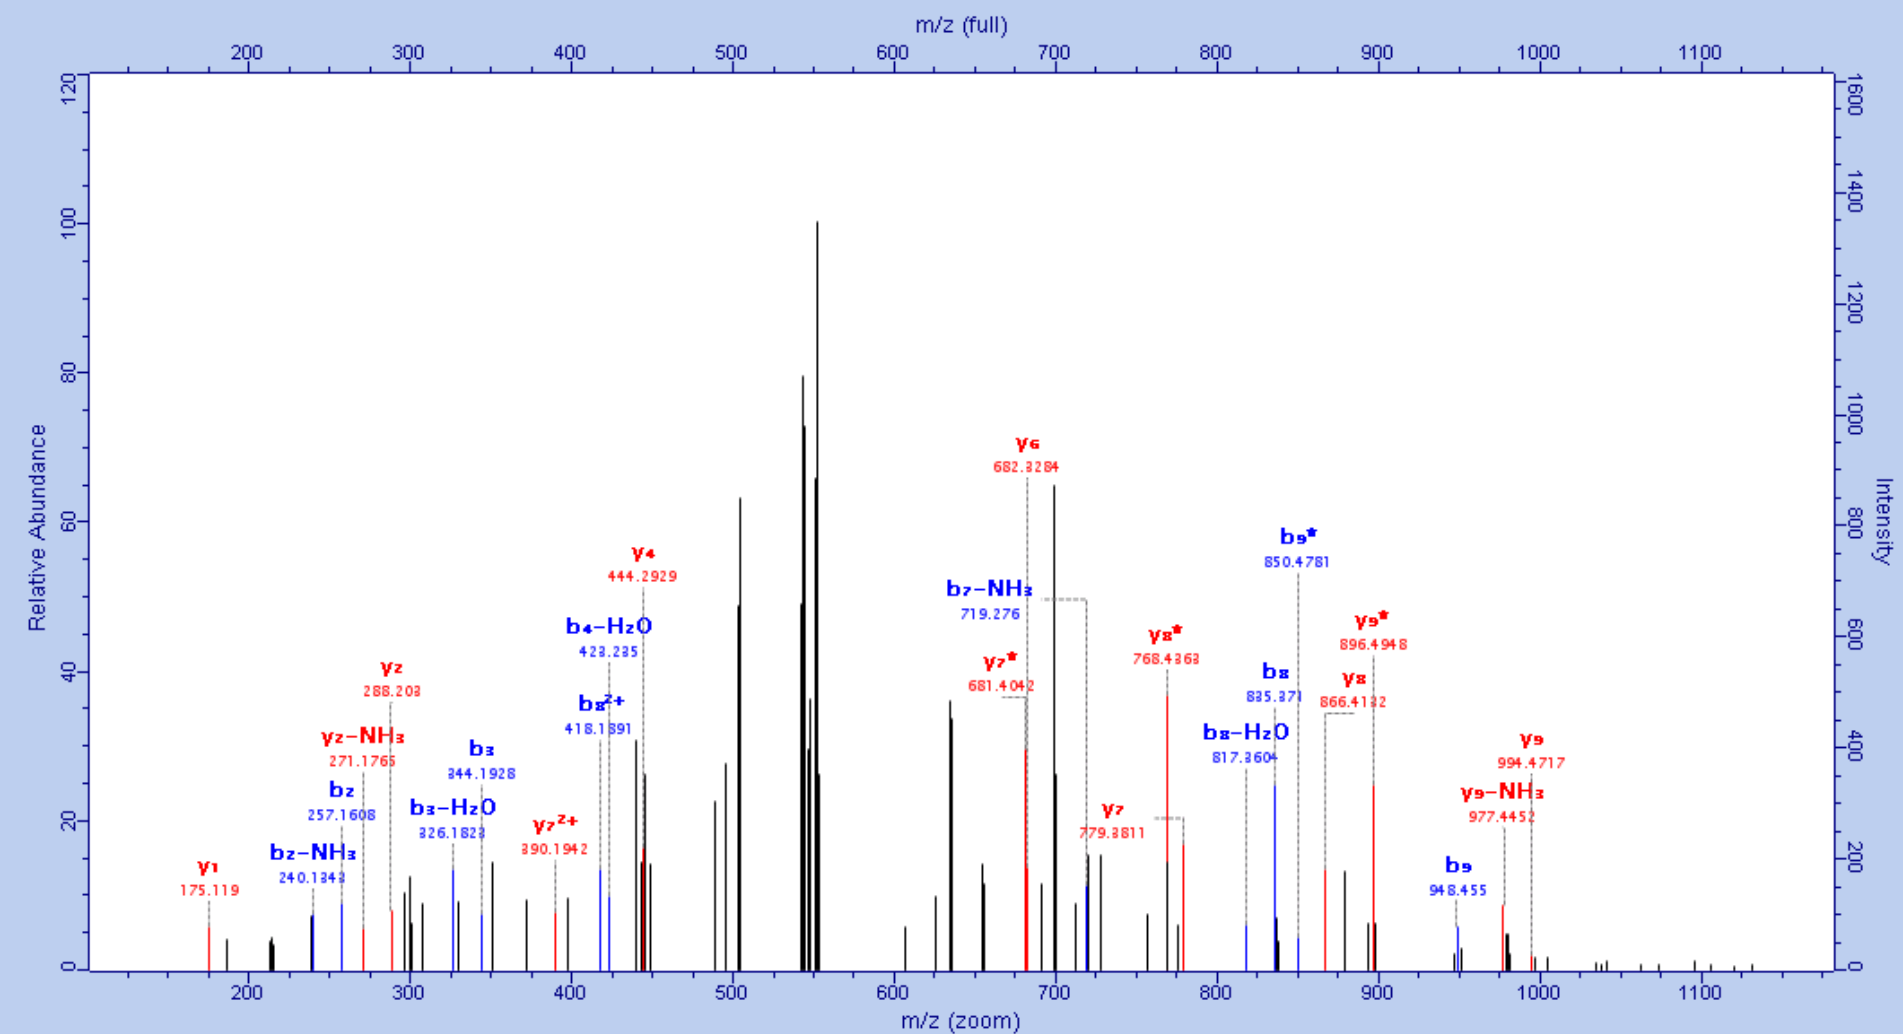

Protein: gil46199106  
Score: 39.69  
Source: service\_HB11  
Scannumber: 1848  
Method: ITMS; CID; 1

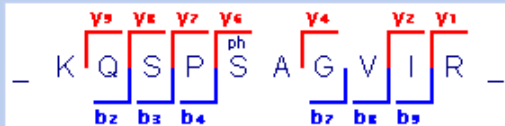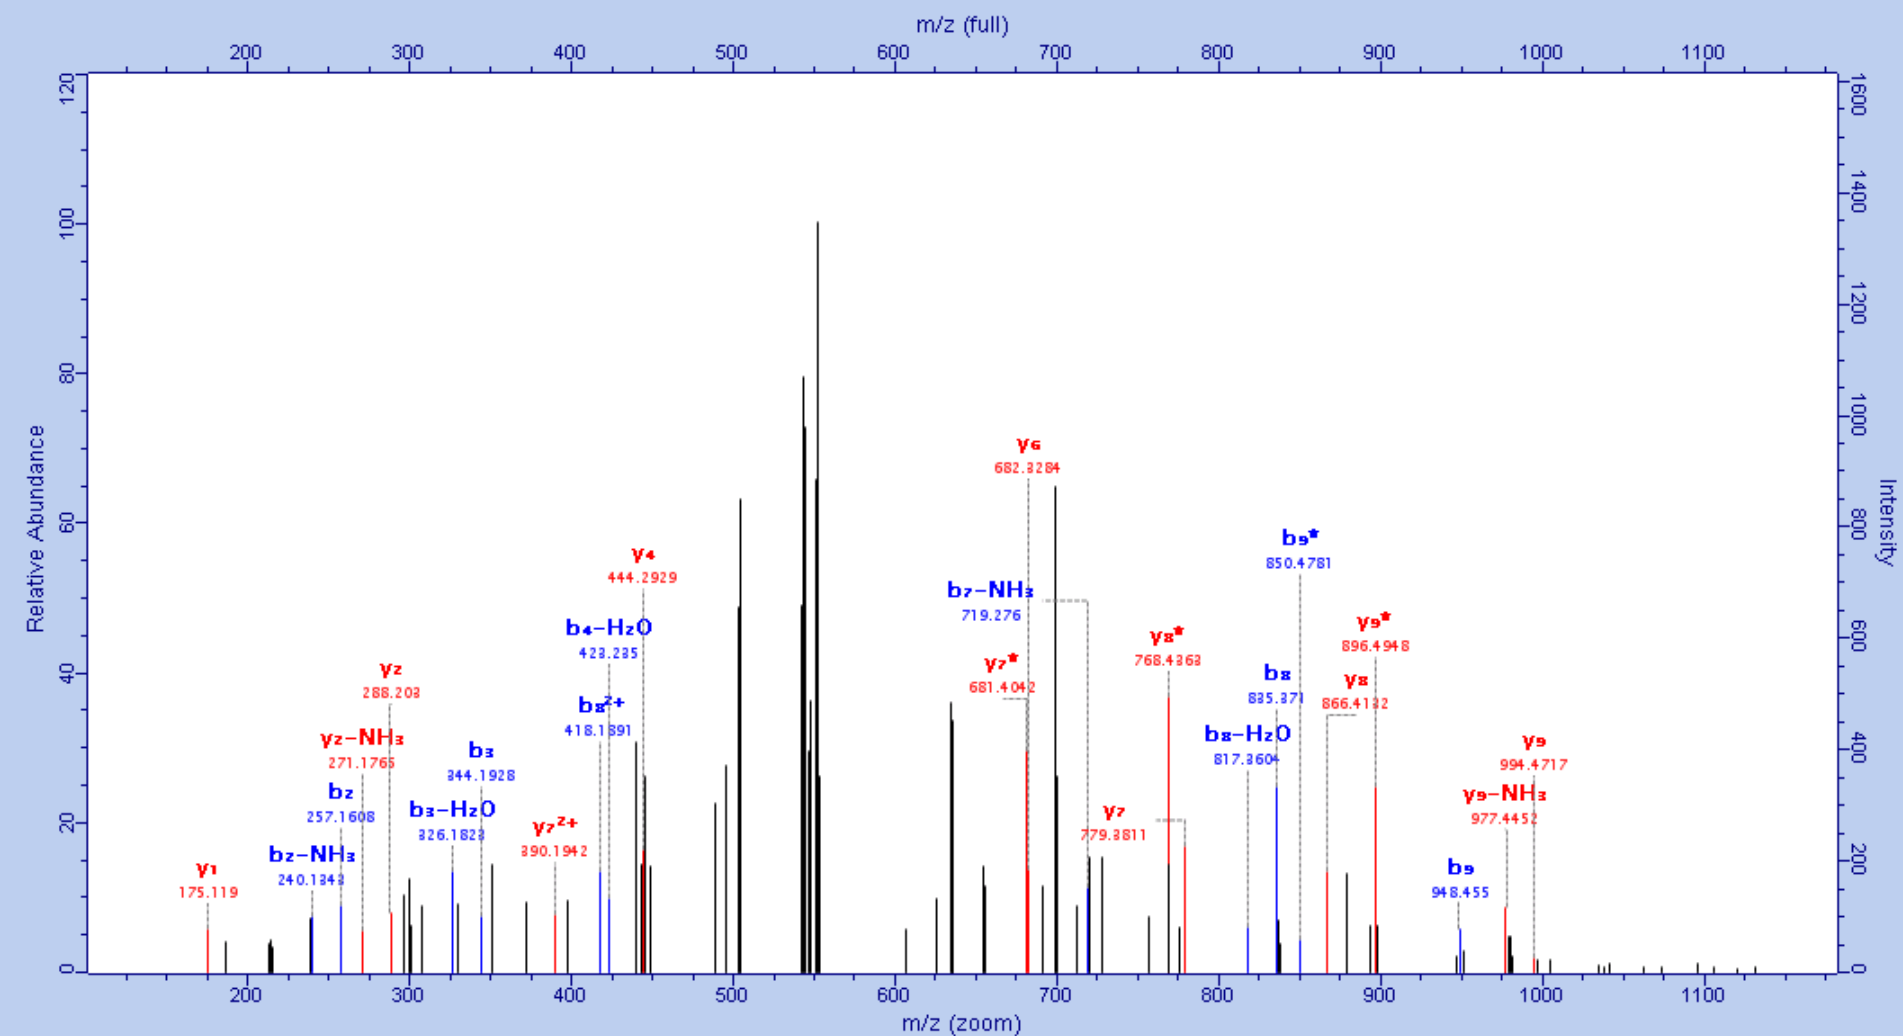

Protein: gil46199231  
Score: 70.74  
Source: service\_HB14  
Scannumber: 2134  
Method: ITMS; CID; 1

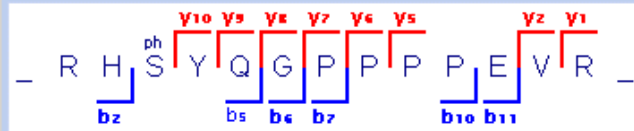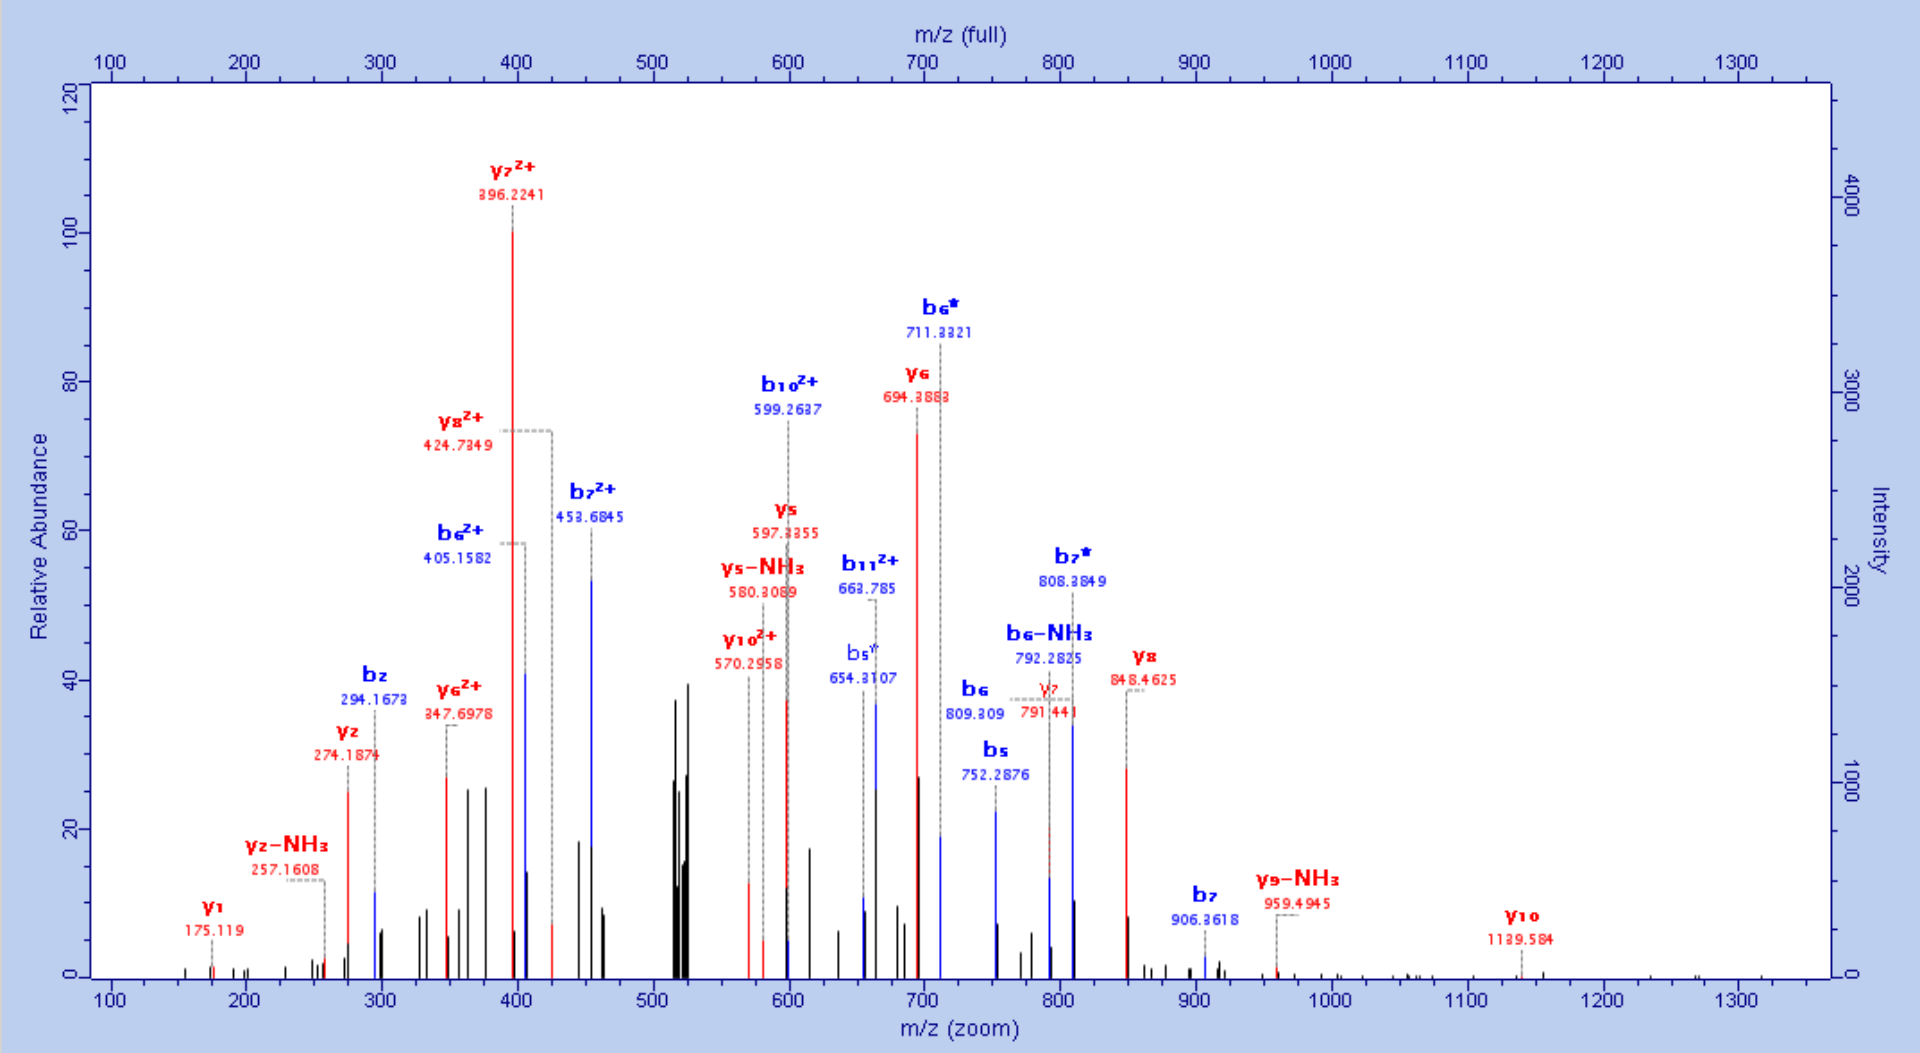

Protein: gil46199231  
Score: 57.16  
Source: service\_HB13  
Scannumber: 2109  
Method: ITMS; CID; 1

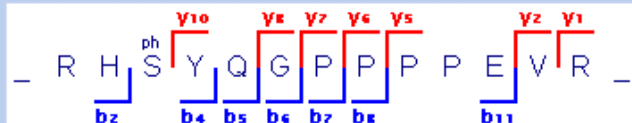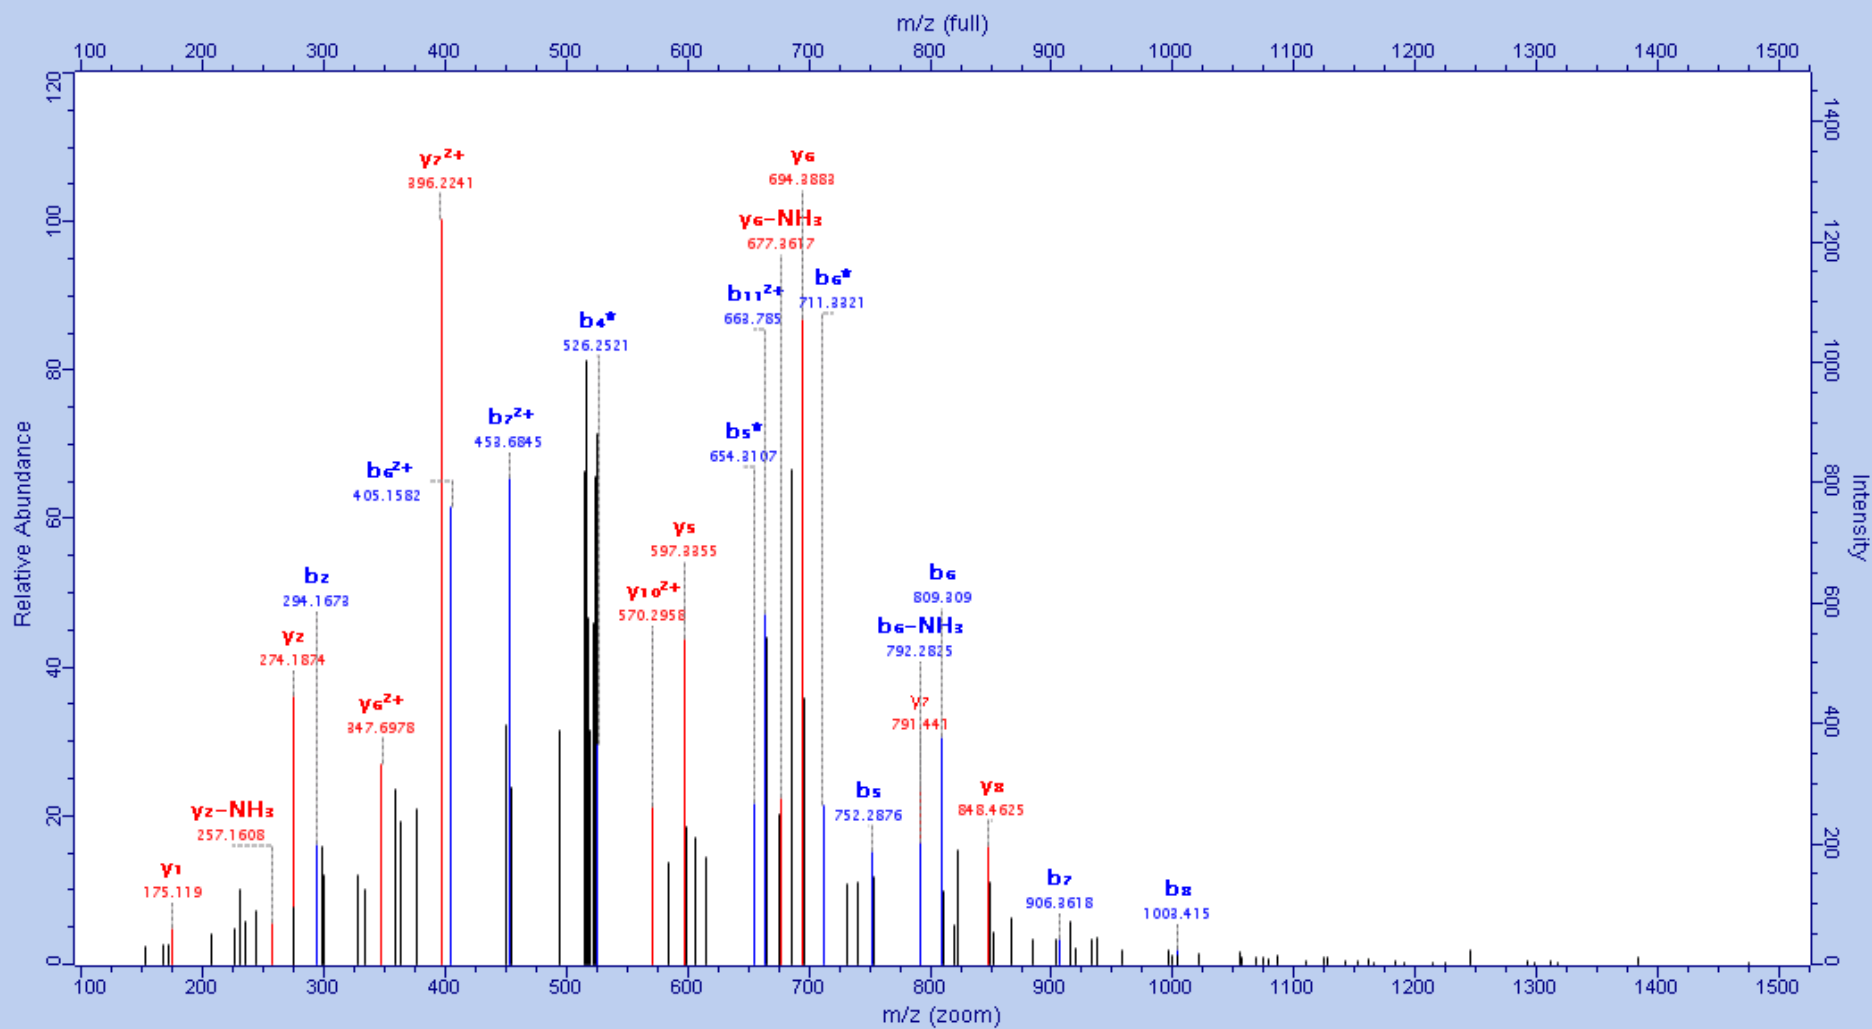



Protein: gjj46193294  
Score: 64.6  
Source: service\_HB15  
Scannumber: 5849  
Method: ITMS; CID: 1

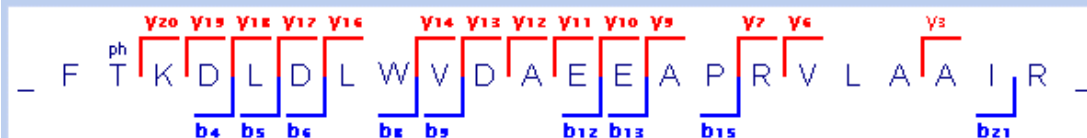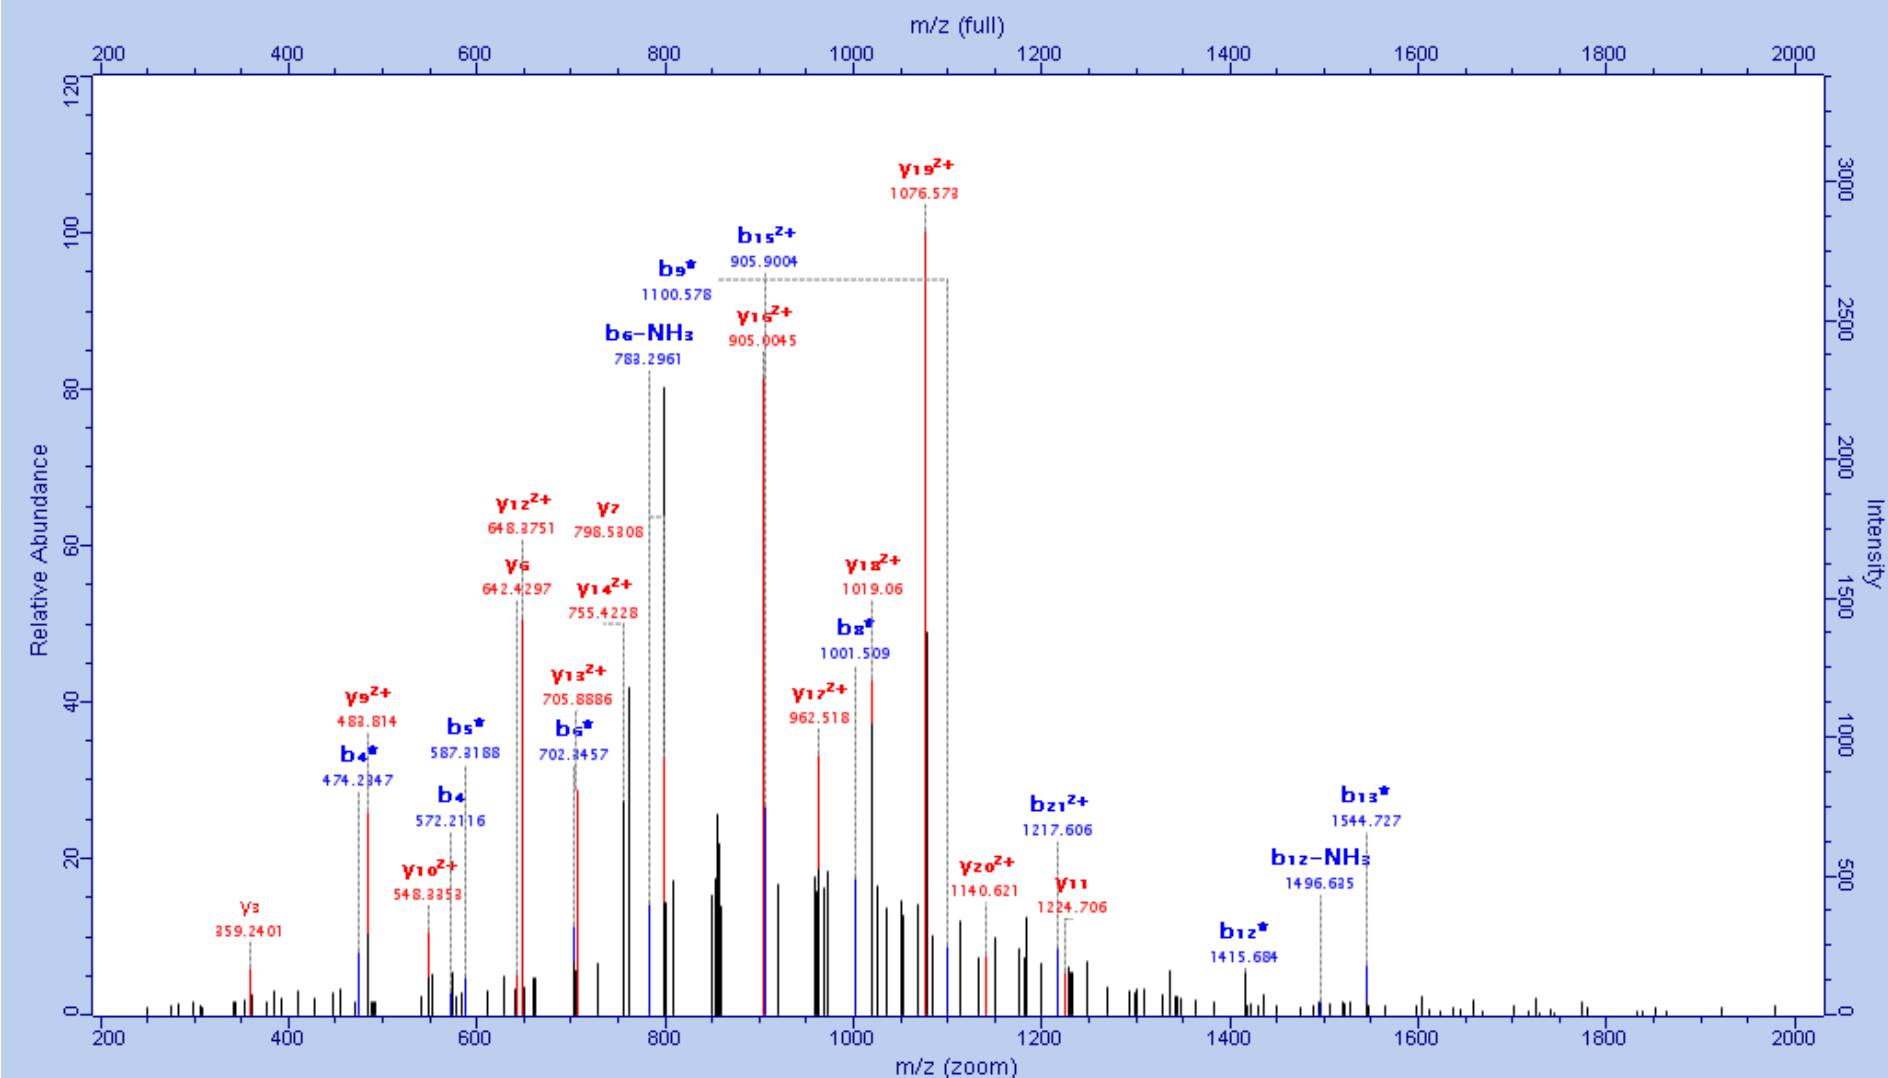

Protein: gil46199314  
Score: 86.09  
Source: AWAN-FT\_090928  
Scannumber: 5384  
Method: ITMS; CID: 1

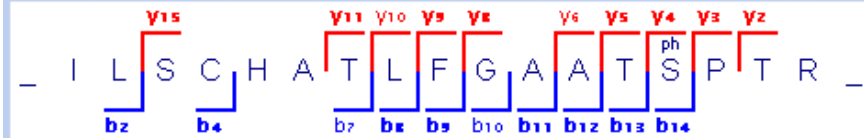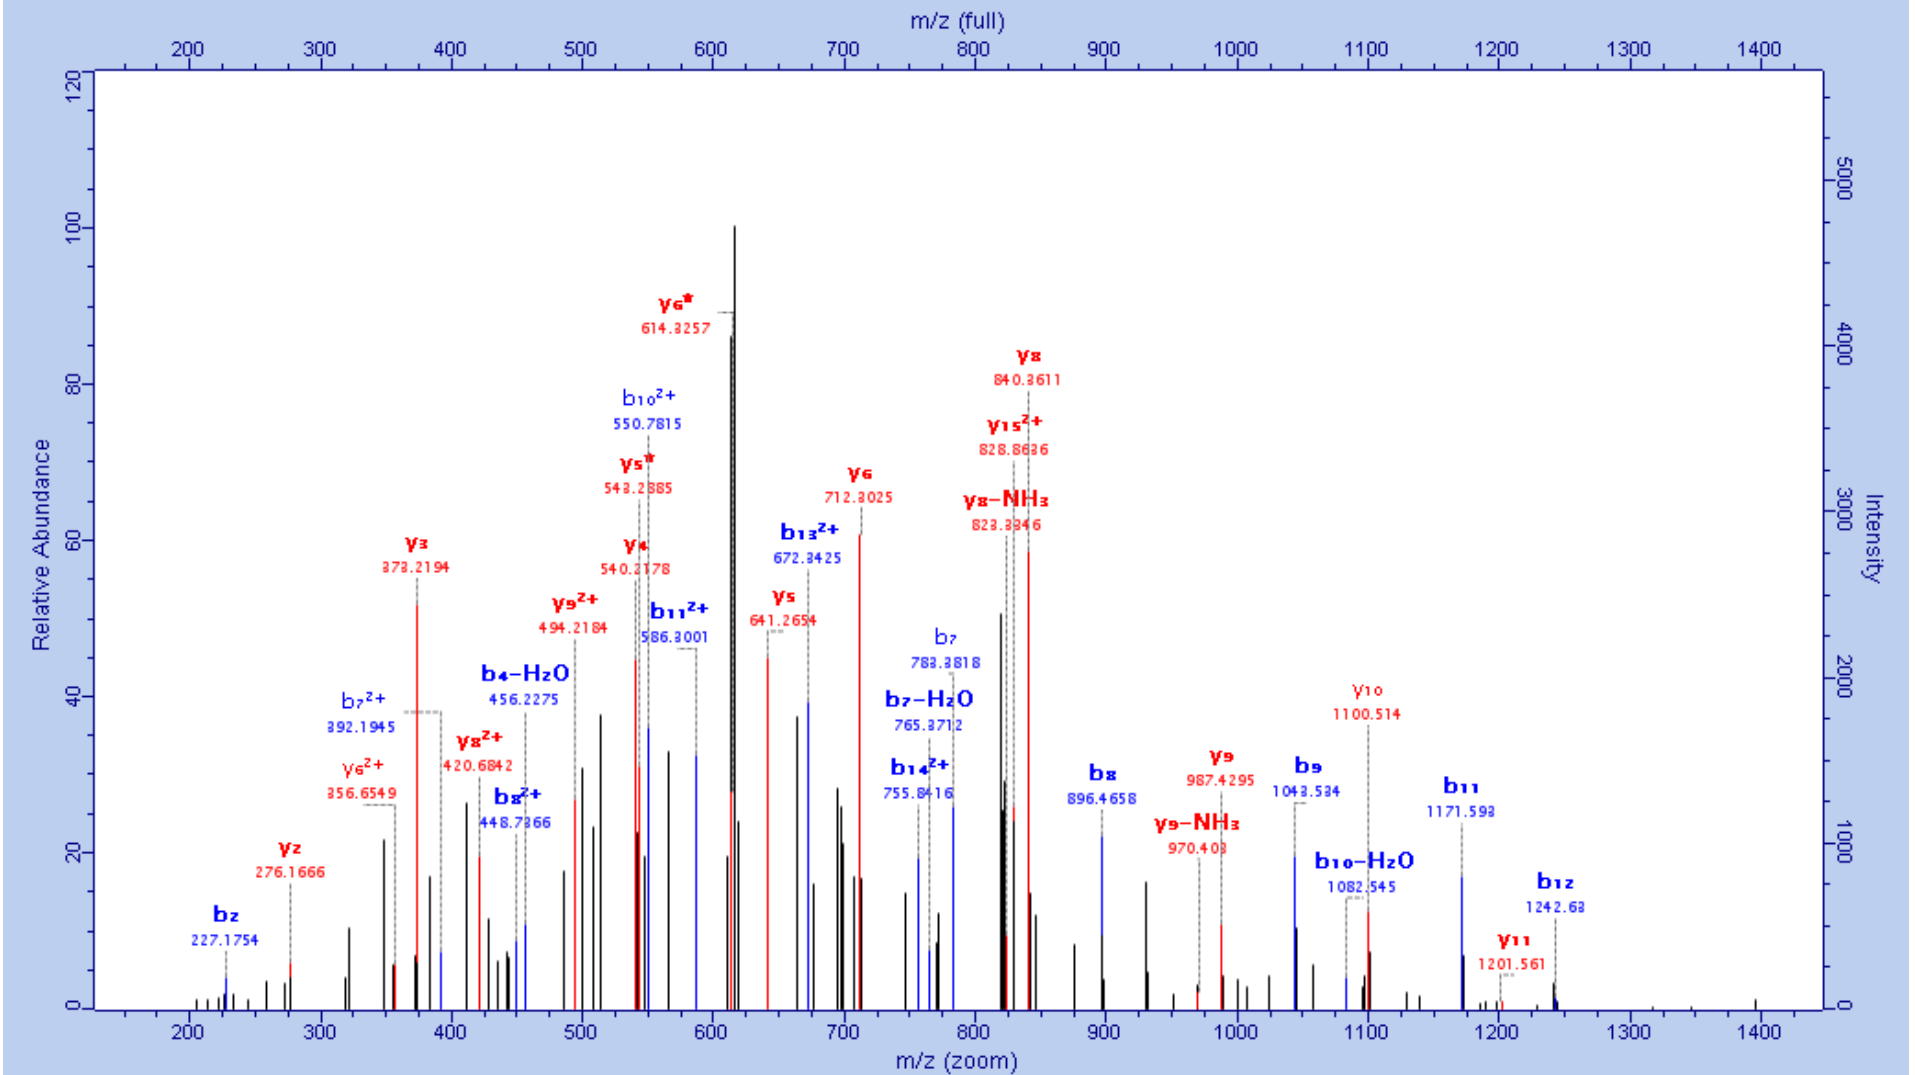

Protein: gil4619331  
Score: 70.48  
Source: service\_7\_090617070009  
Scannumber: 7529  
Method: ITMS; CID; 1

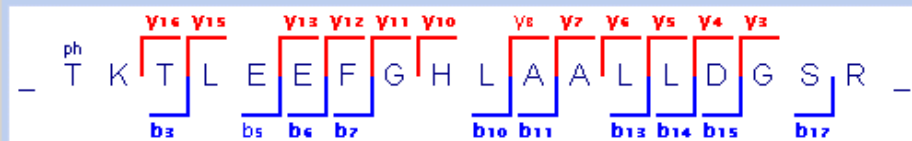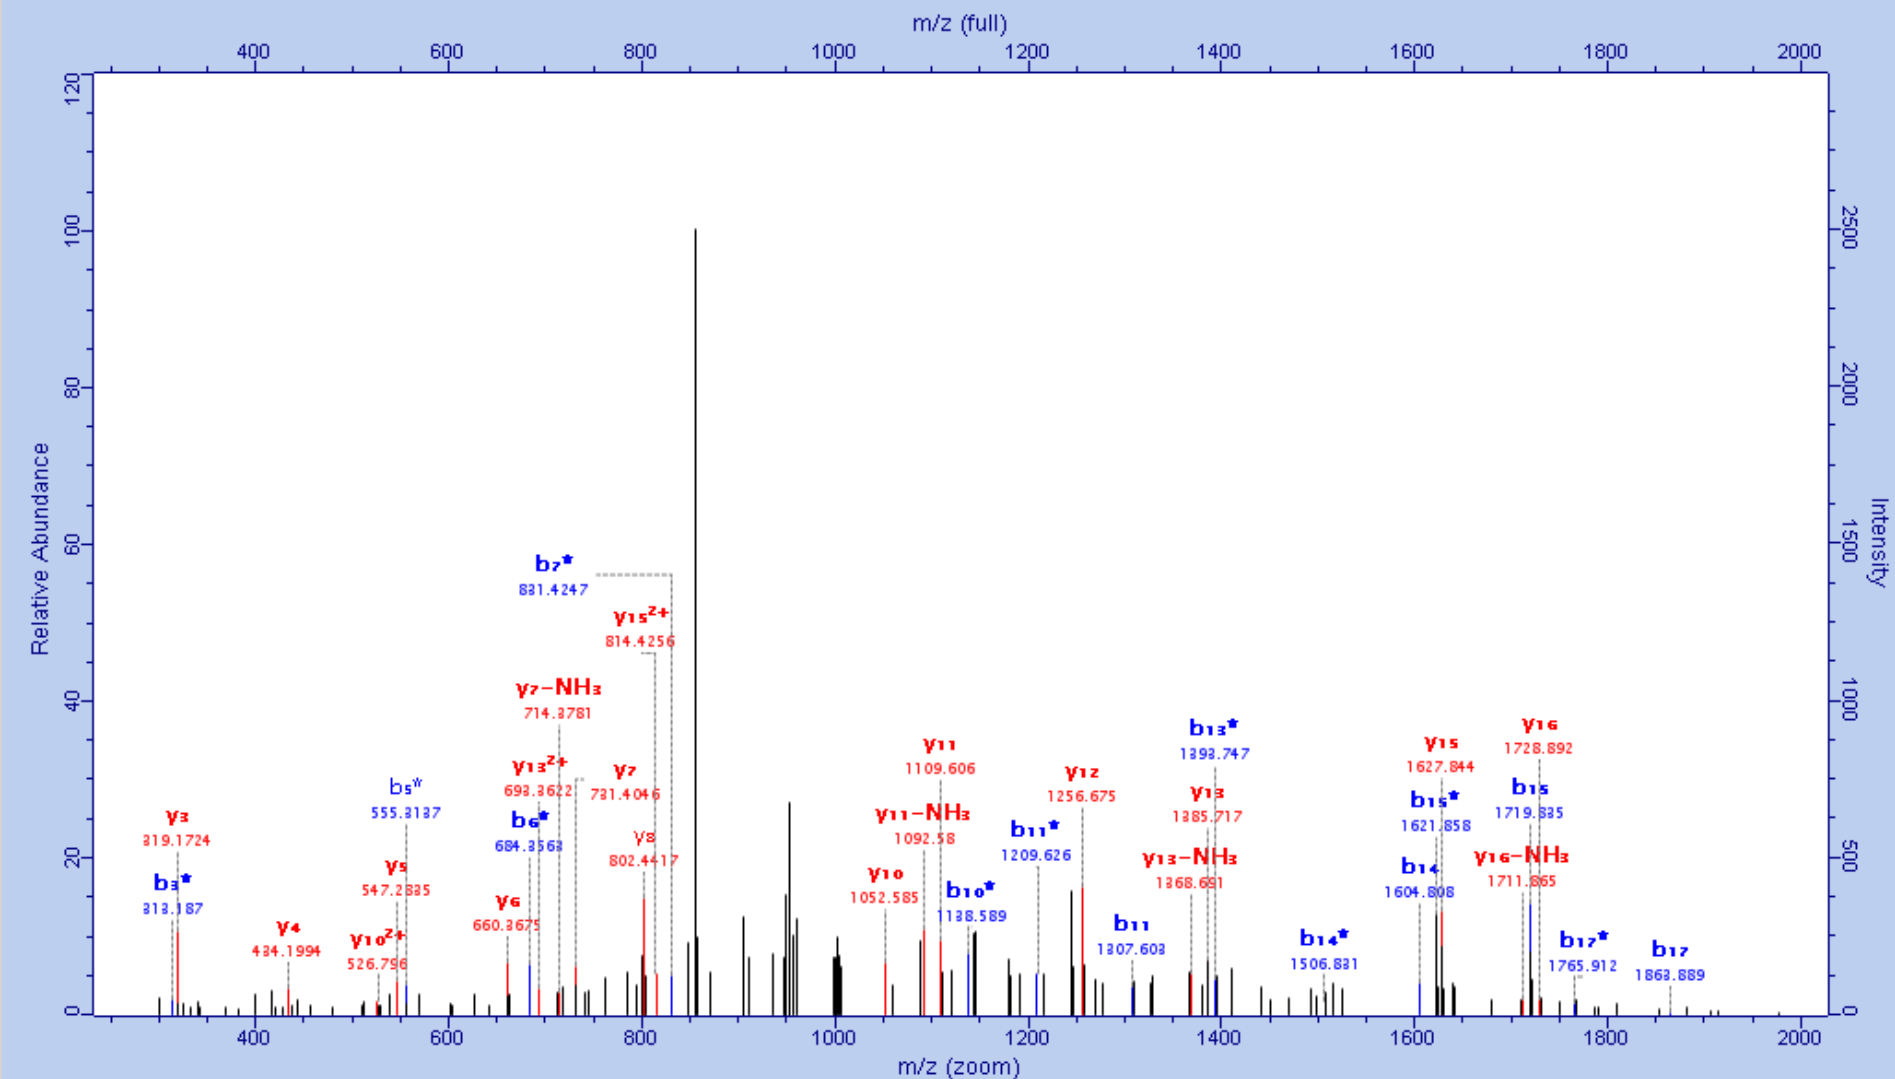

Protein: gil46199331  
Score: 88.52  
Source: service\_5  
Scannumber: 7541  
Method: ITMS; CID; 1

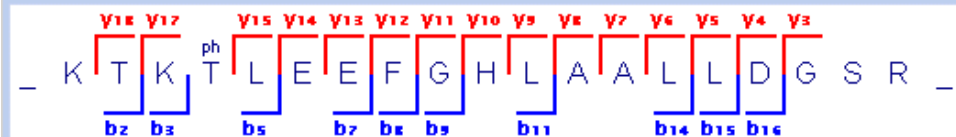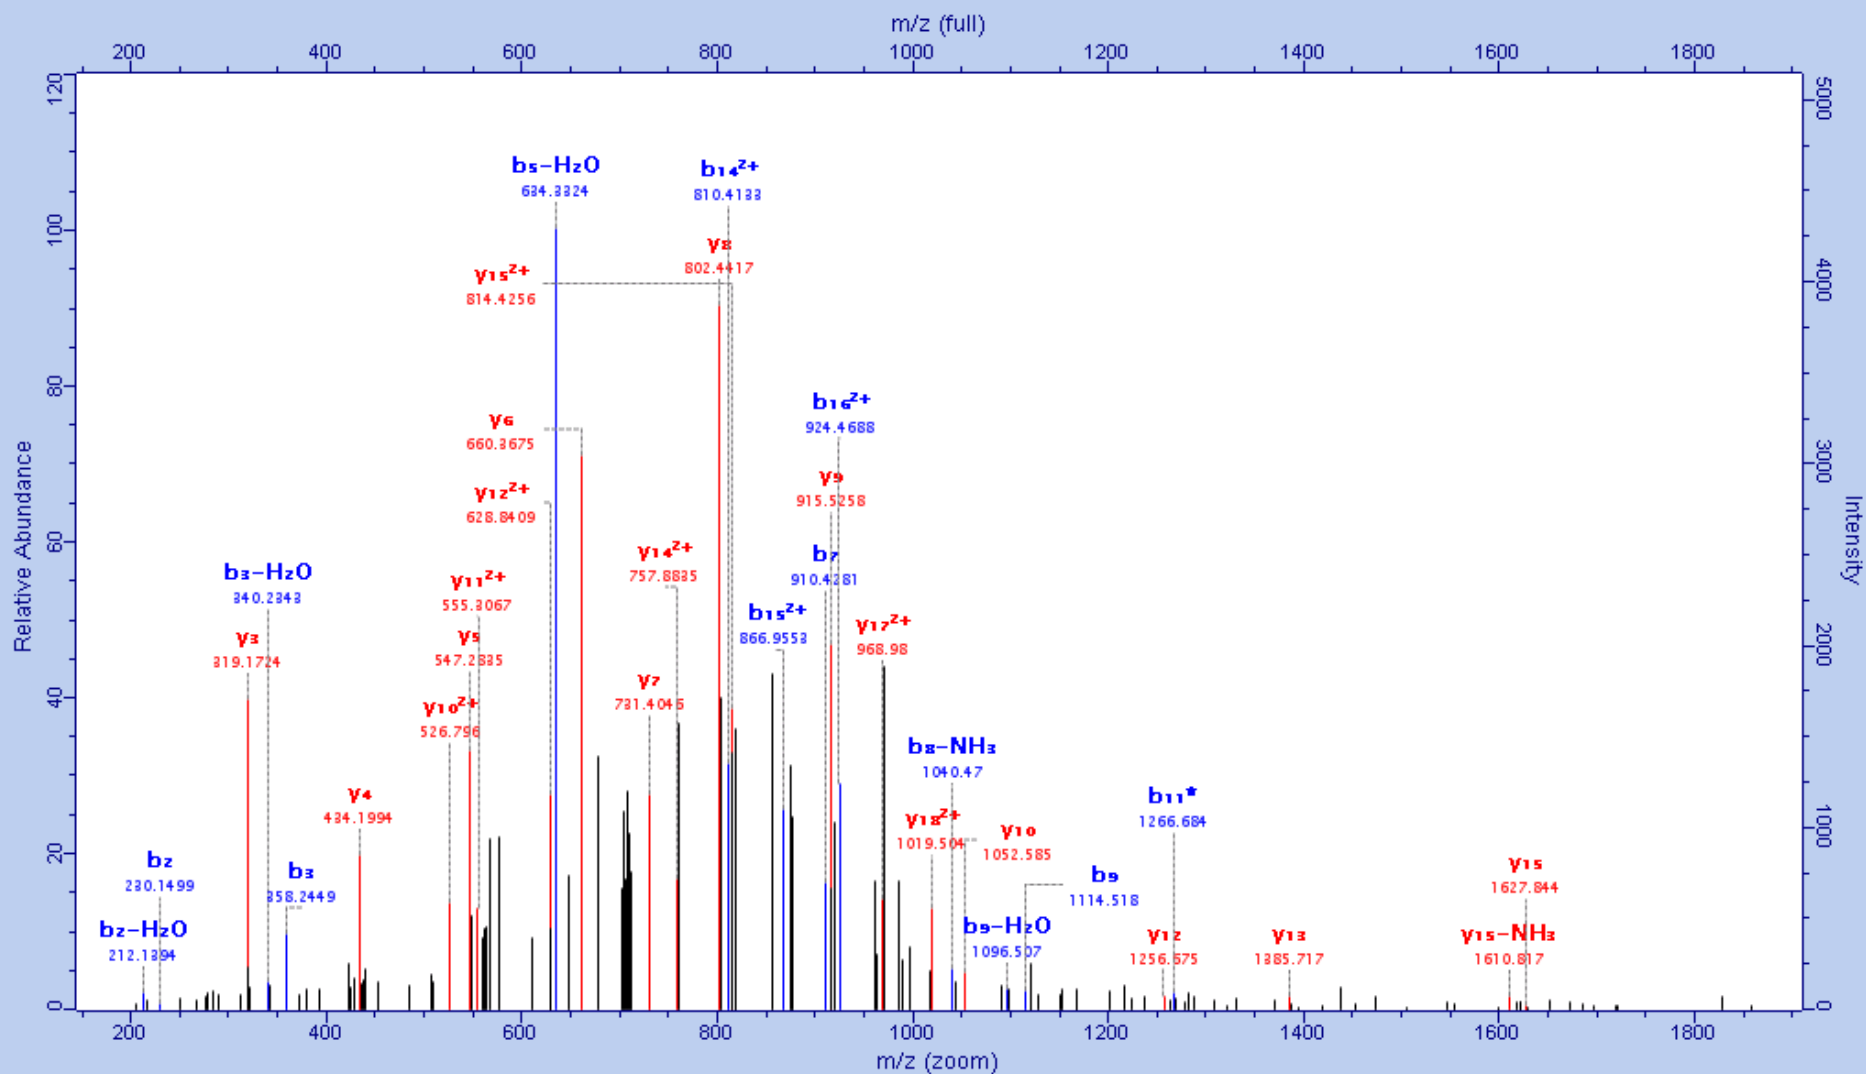

Protein: gil46199365  
Score: 166.51  
Source: AWAN-FT\_090928  
Scannumber: 4777  
Method: ITMS; CID; 1

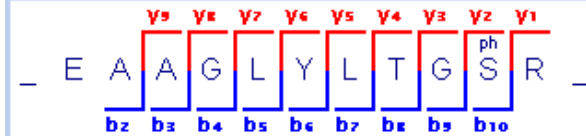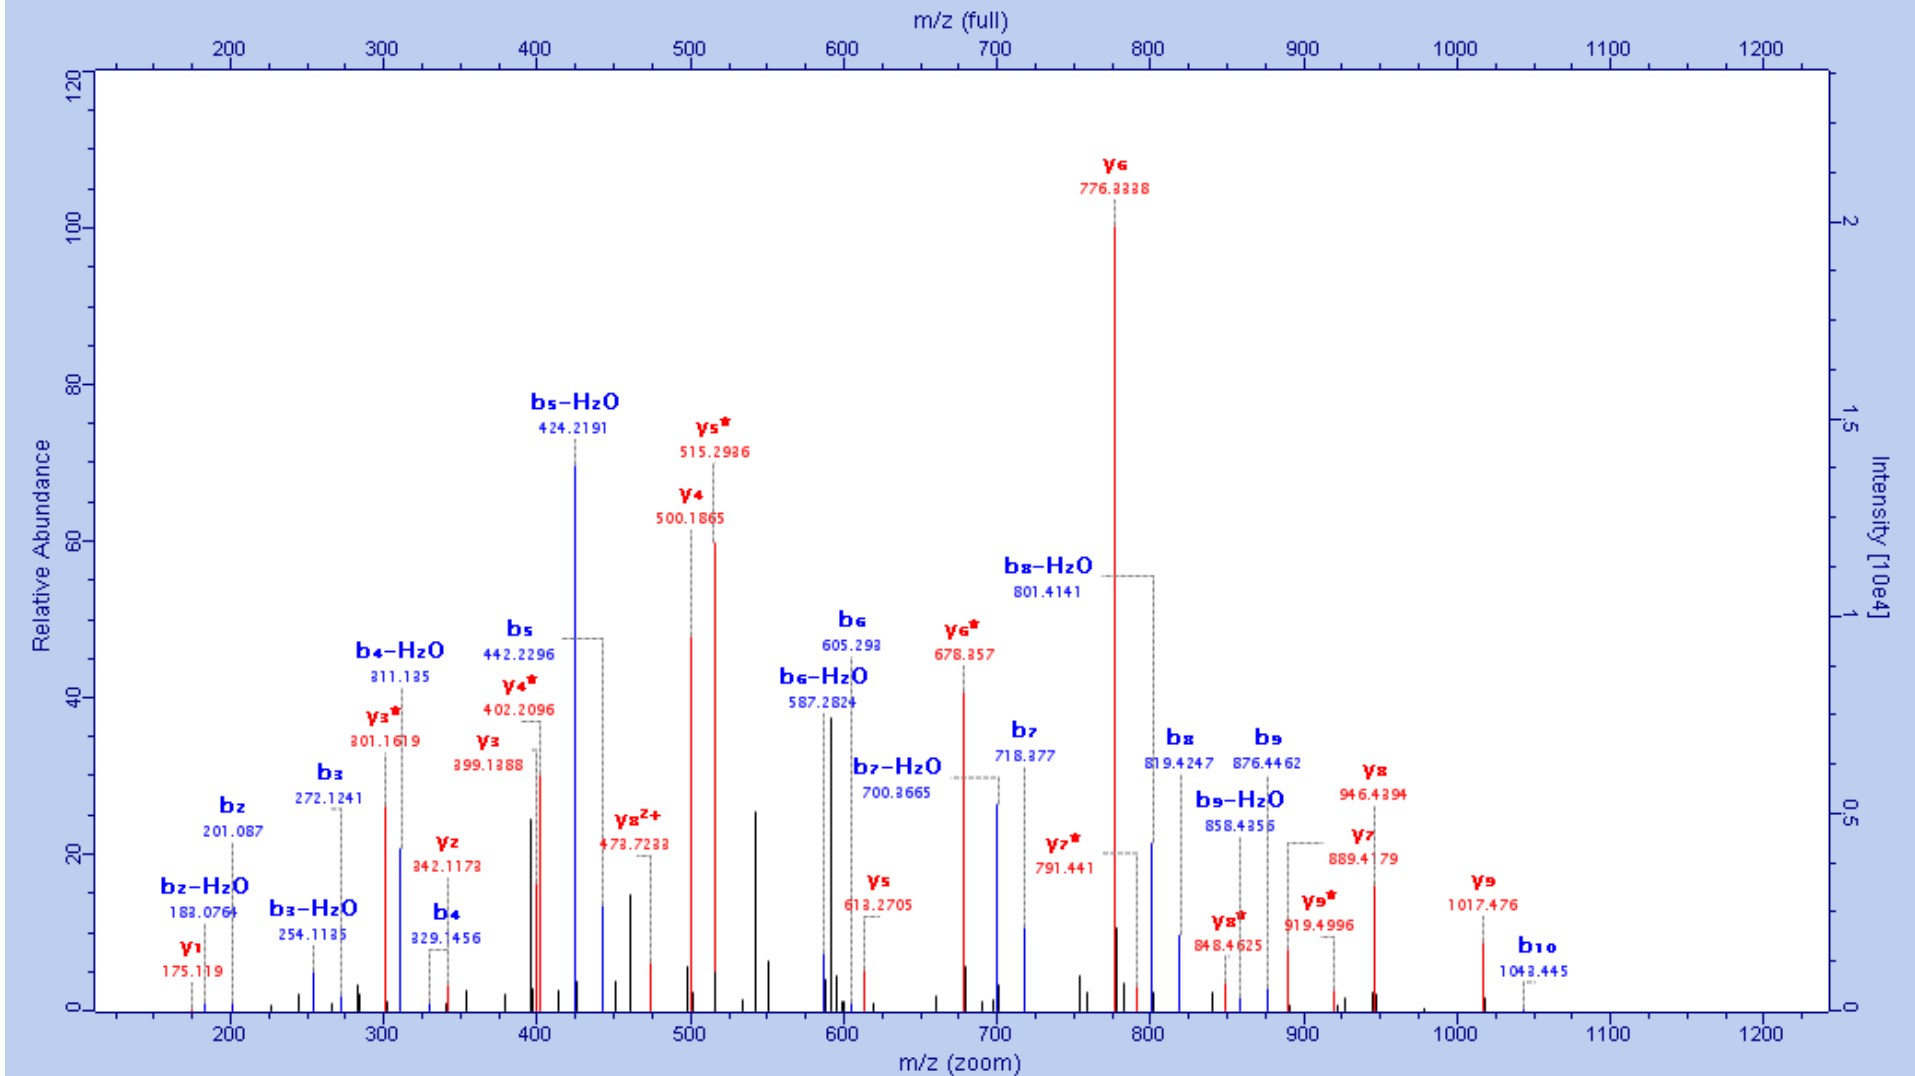

Protein: gil46199365  
Score: 20.82  
Source: AWAN-19-21\_090928  
Scannumber: 4379  
Method: ITMS; CID; 1

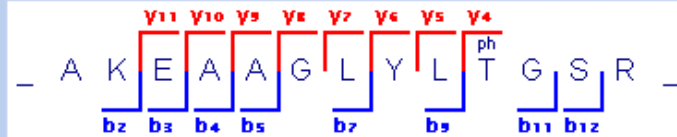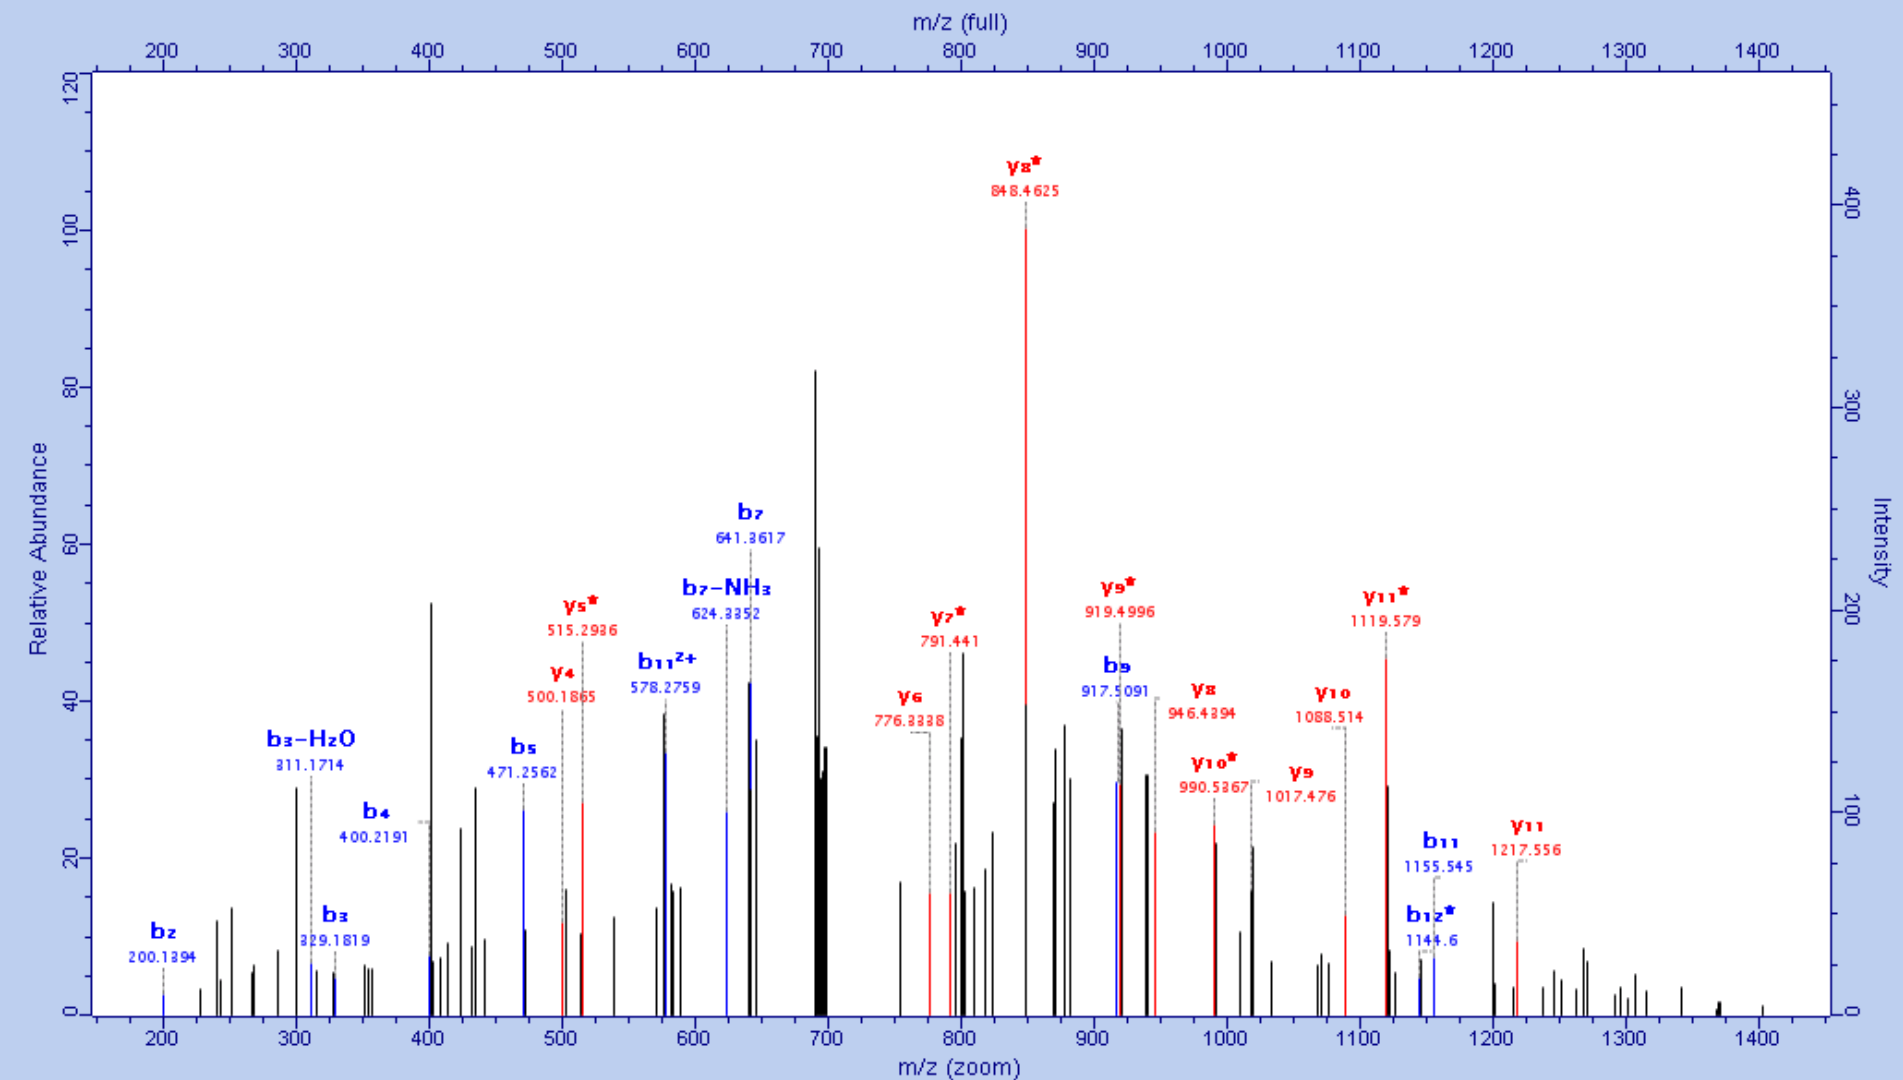

Protein: gjl46193365  
Score: 5.24  
Source: AWAN-19-21\_090928  
Scannumber: 7022  
Method: ITMS; CID: 1

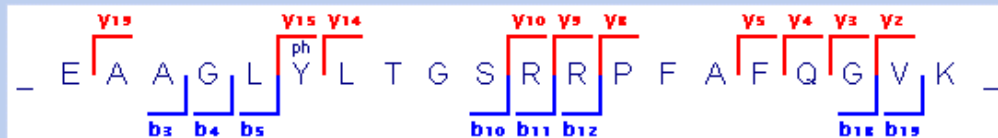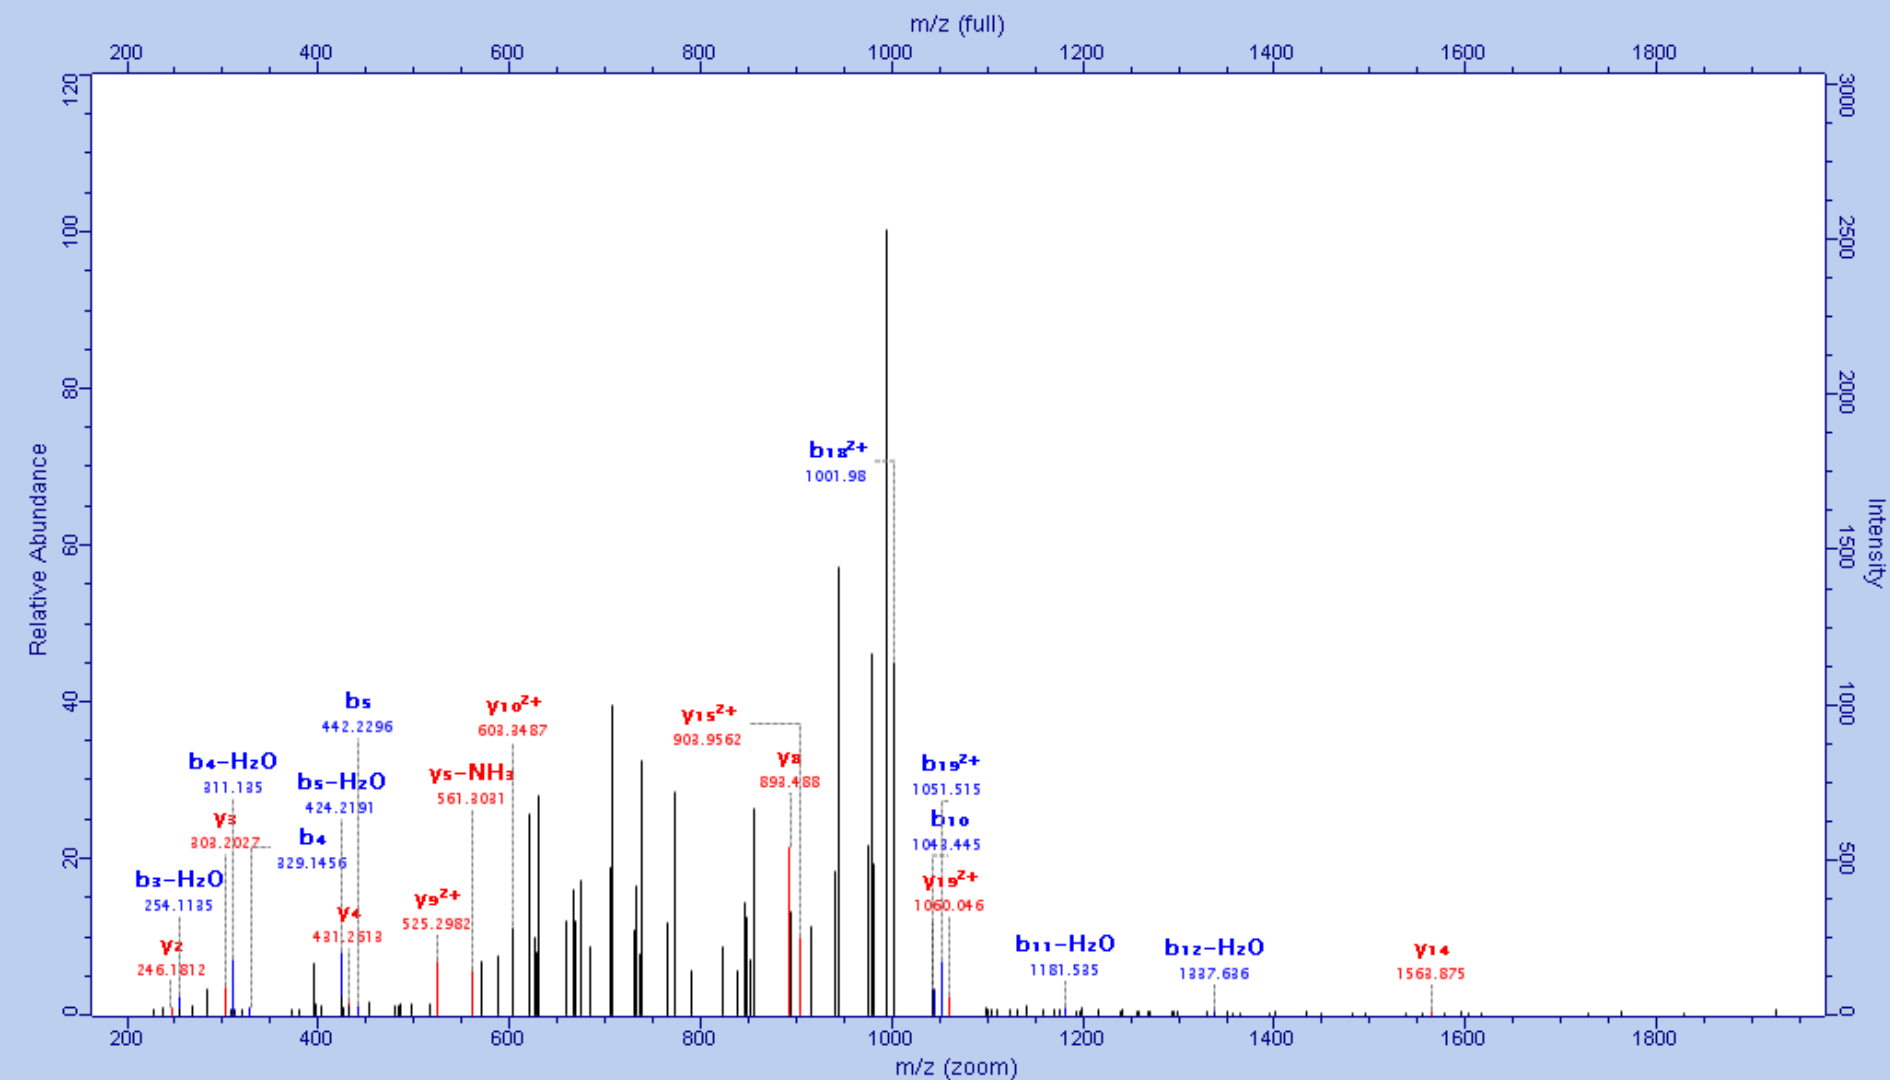

Protein: gil46193404  
Score: 49.23  
Source: service\_HB3  
Scannumber: 4488  
Method: ITMS; CID; 1

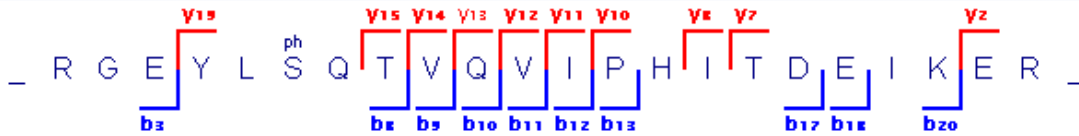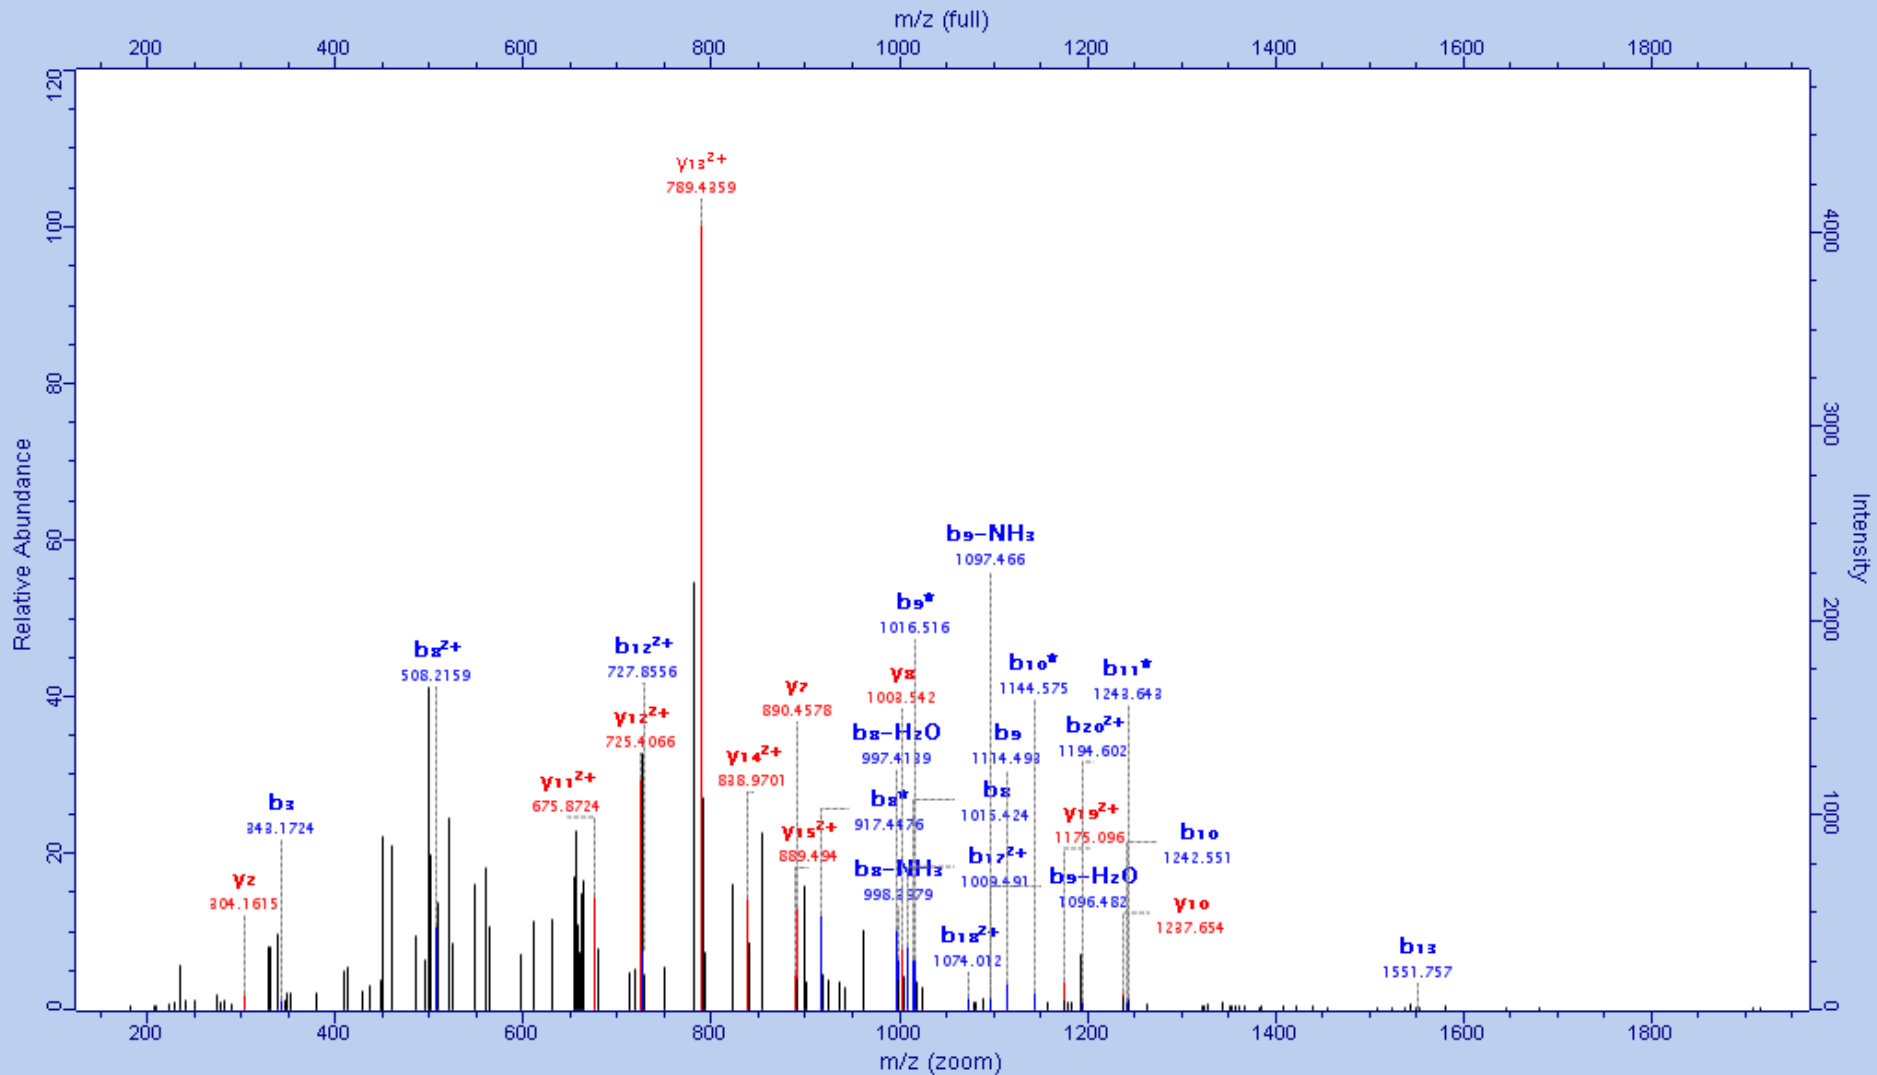



Protein: gil46199404  
Score: 4.57  
Source: service\_1\_090616181010  
Scannumber: 2269  
Method: ITMS; CID; 1

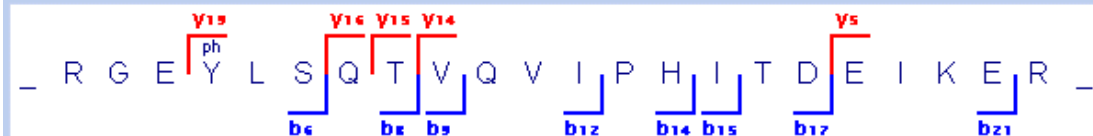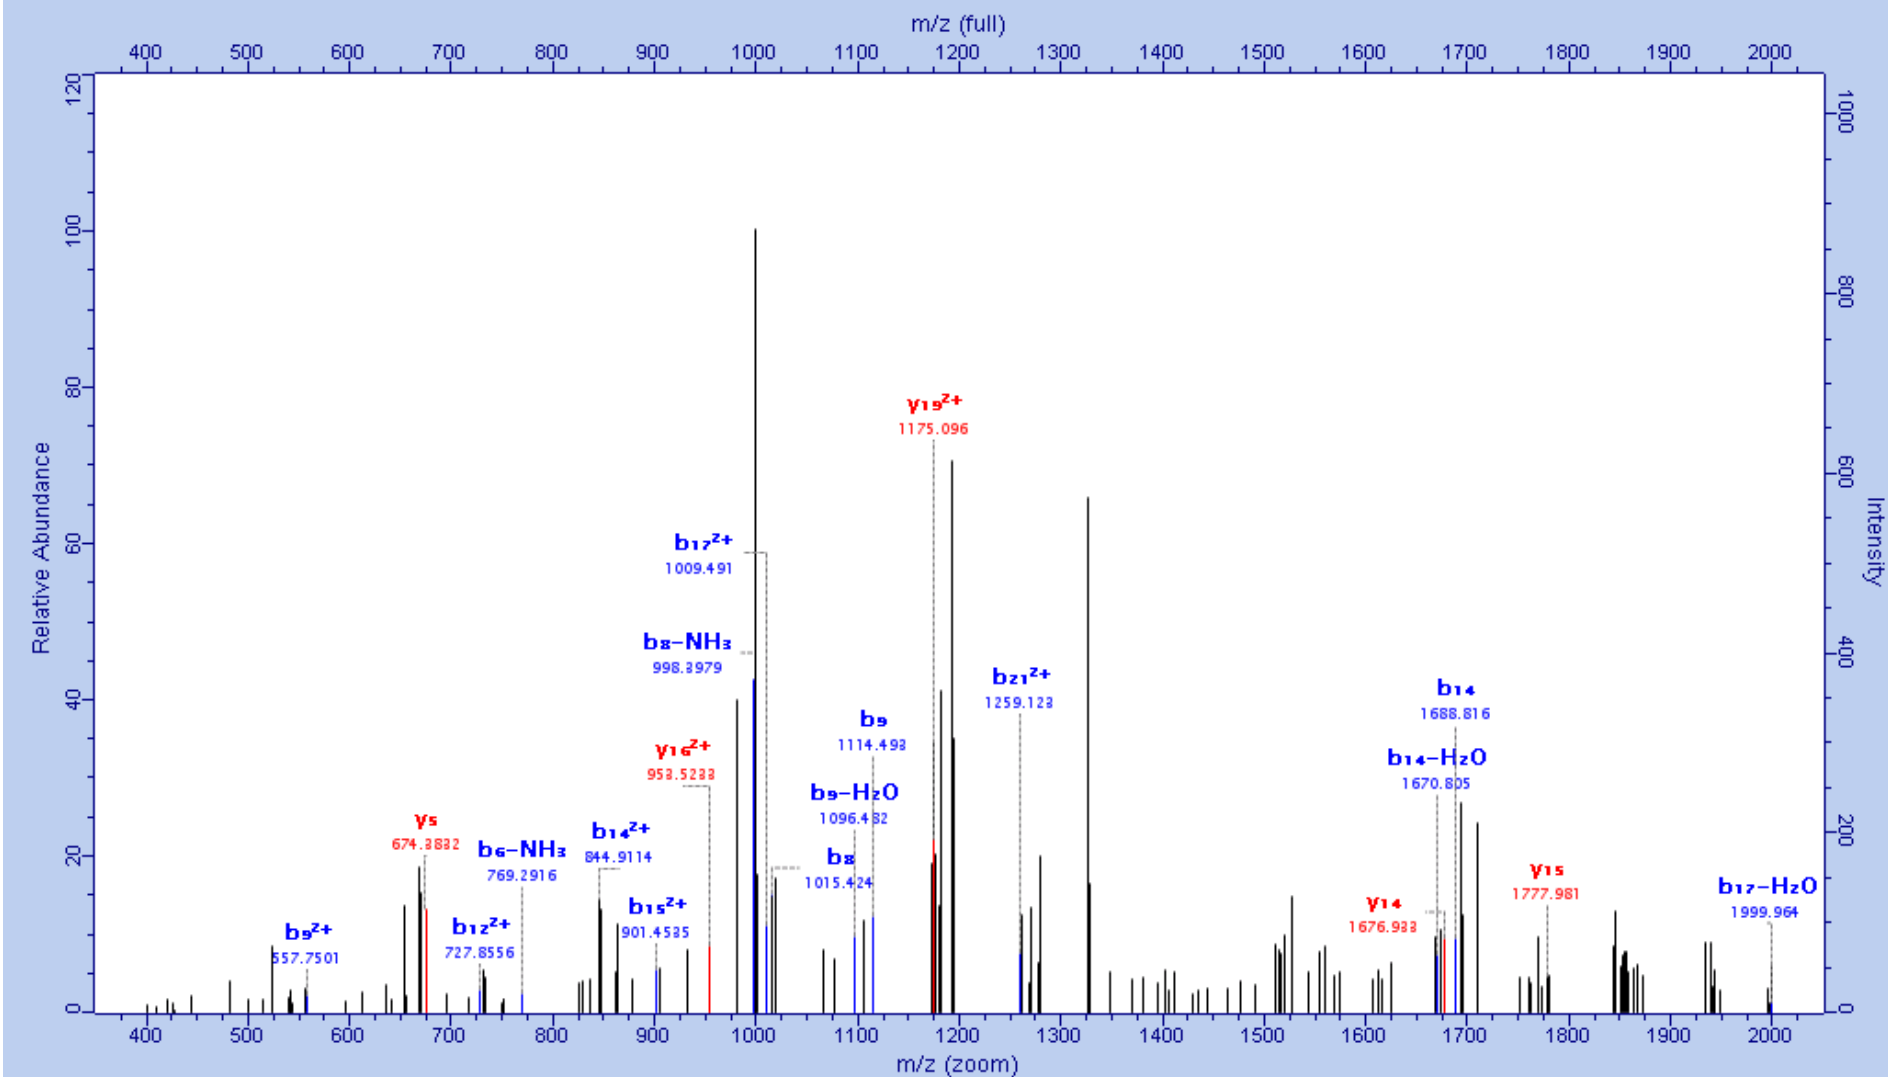

Protein: gil46199438  
Score: 0  
Source: service\_5  
Scannumber: 3137  
Method: ITMS; CID; 1

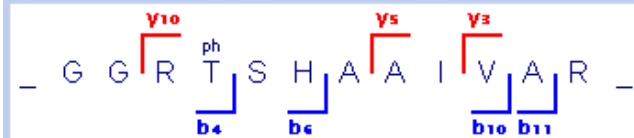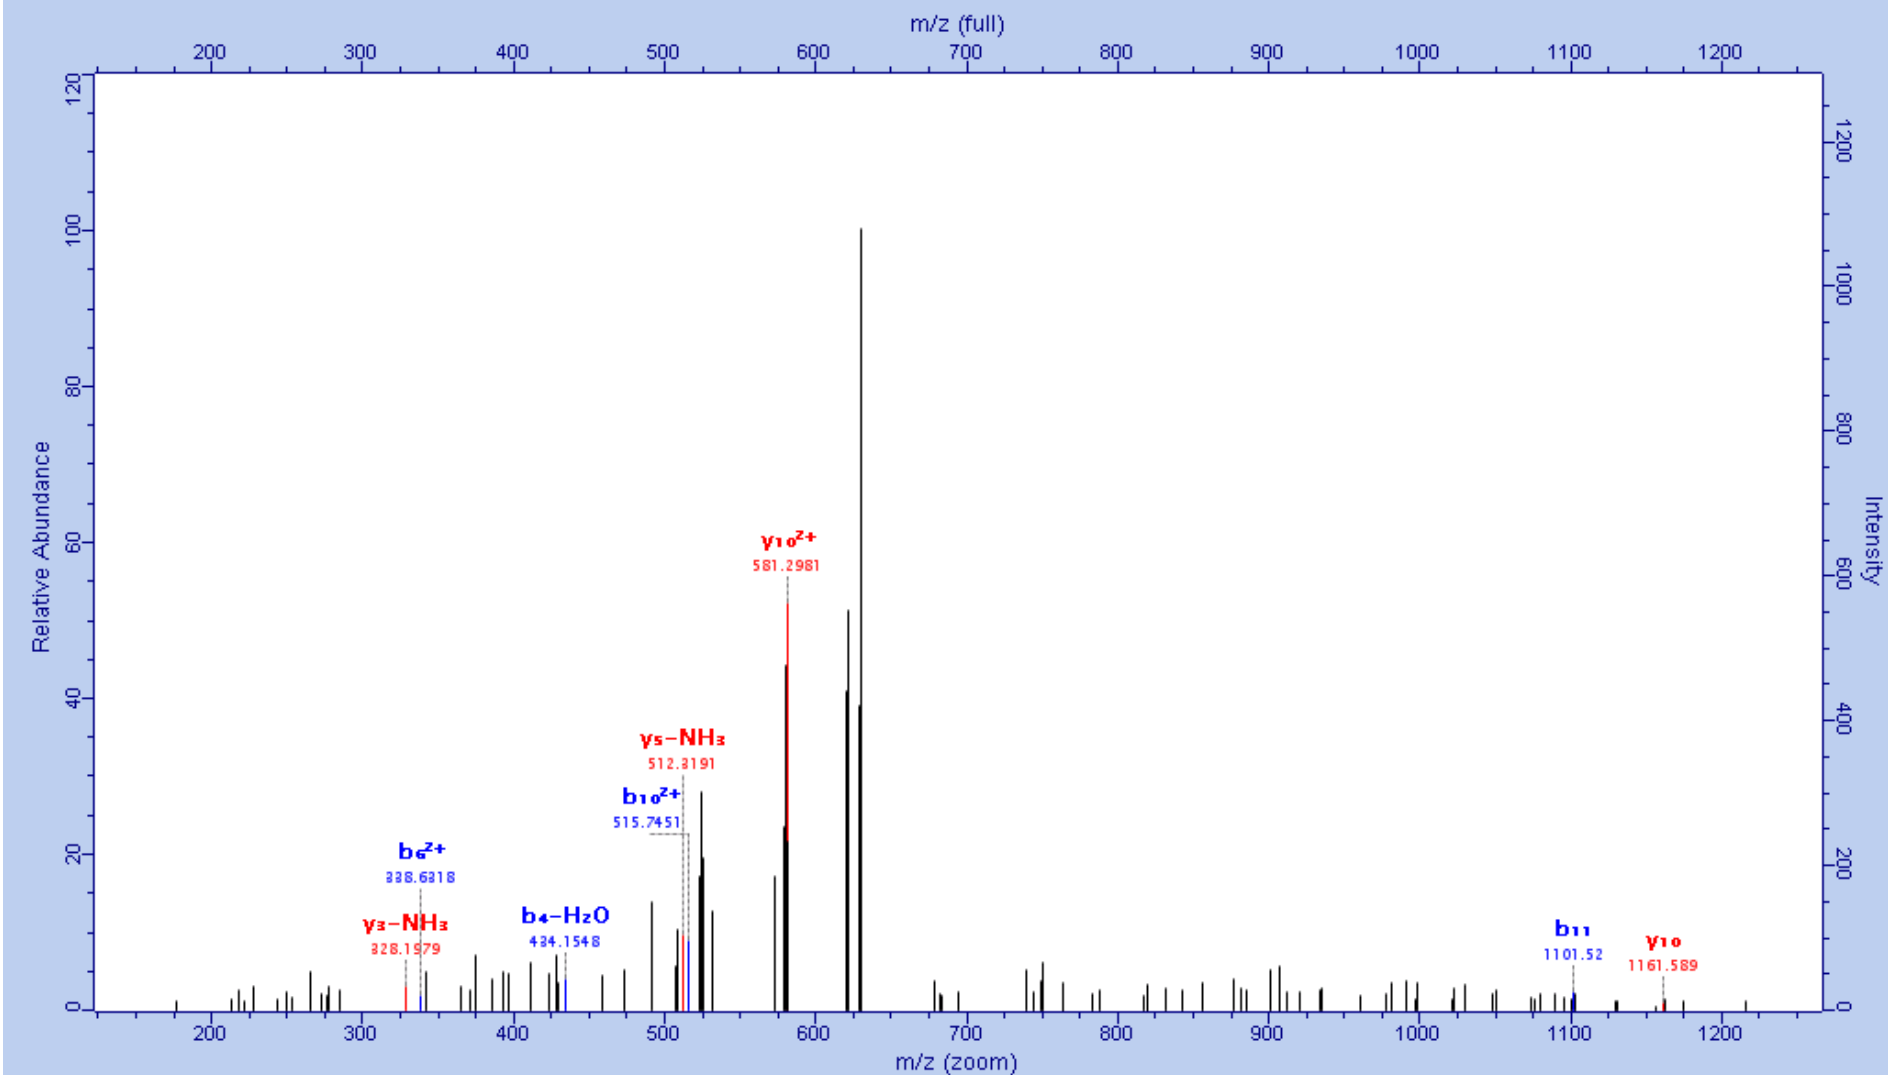

Protein: gil46199438  
Score: 35.39  
Source: AWAN-13-14\_090928  
Scannumber: 1460  
Method: ITMS; CID: 1

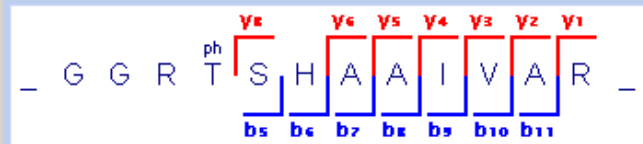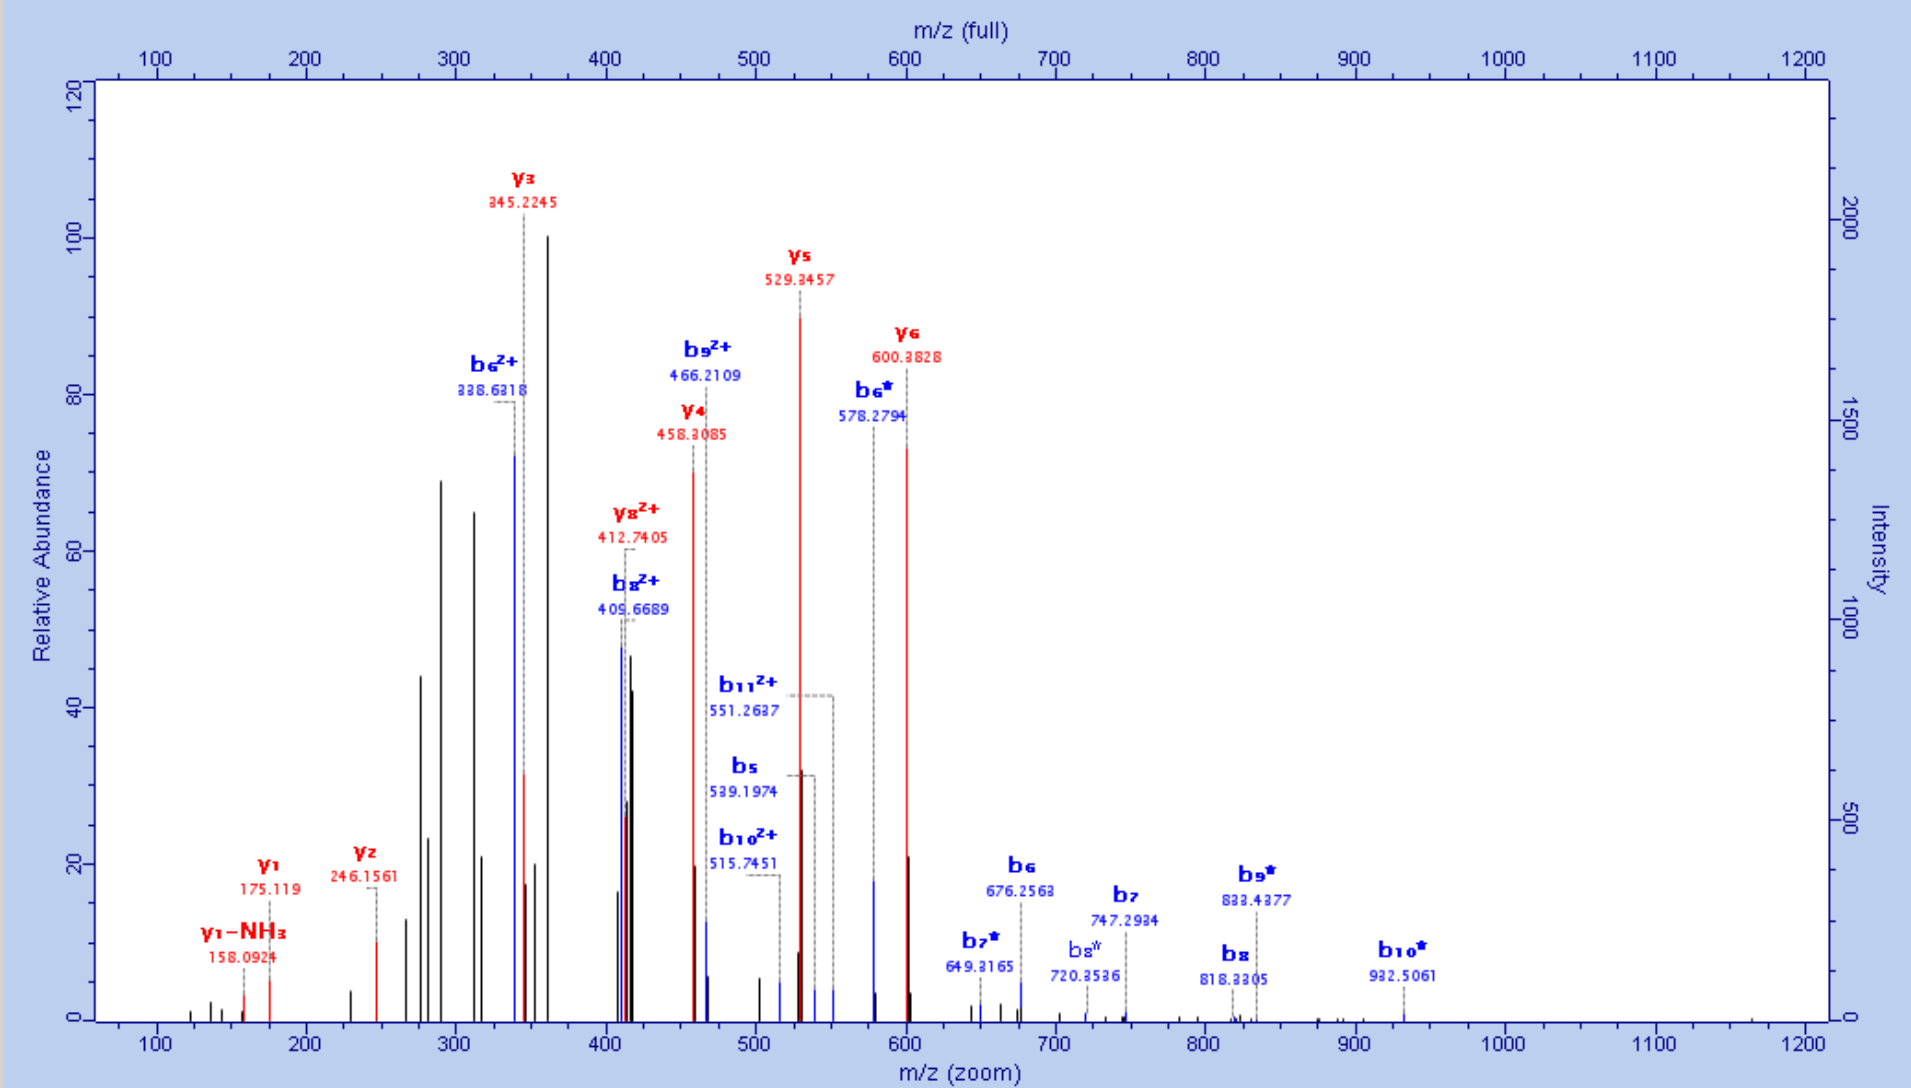

Protein: gil46139451  
 Score: 46.17  
 Source: service\_6\_090617045148  
 Scannumber: 4084  
 Method: ITMS; CID; 1

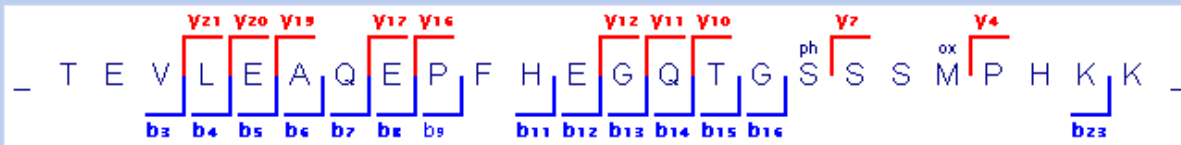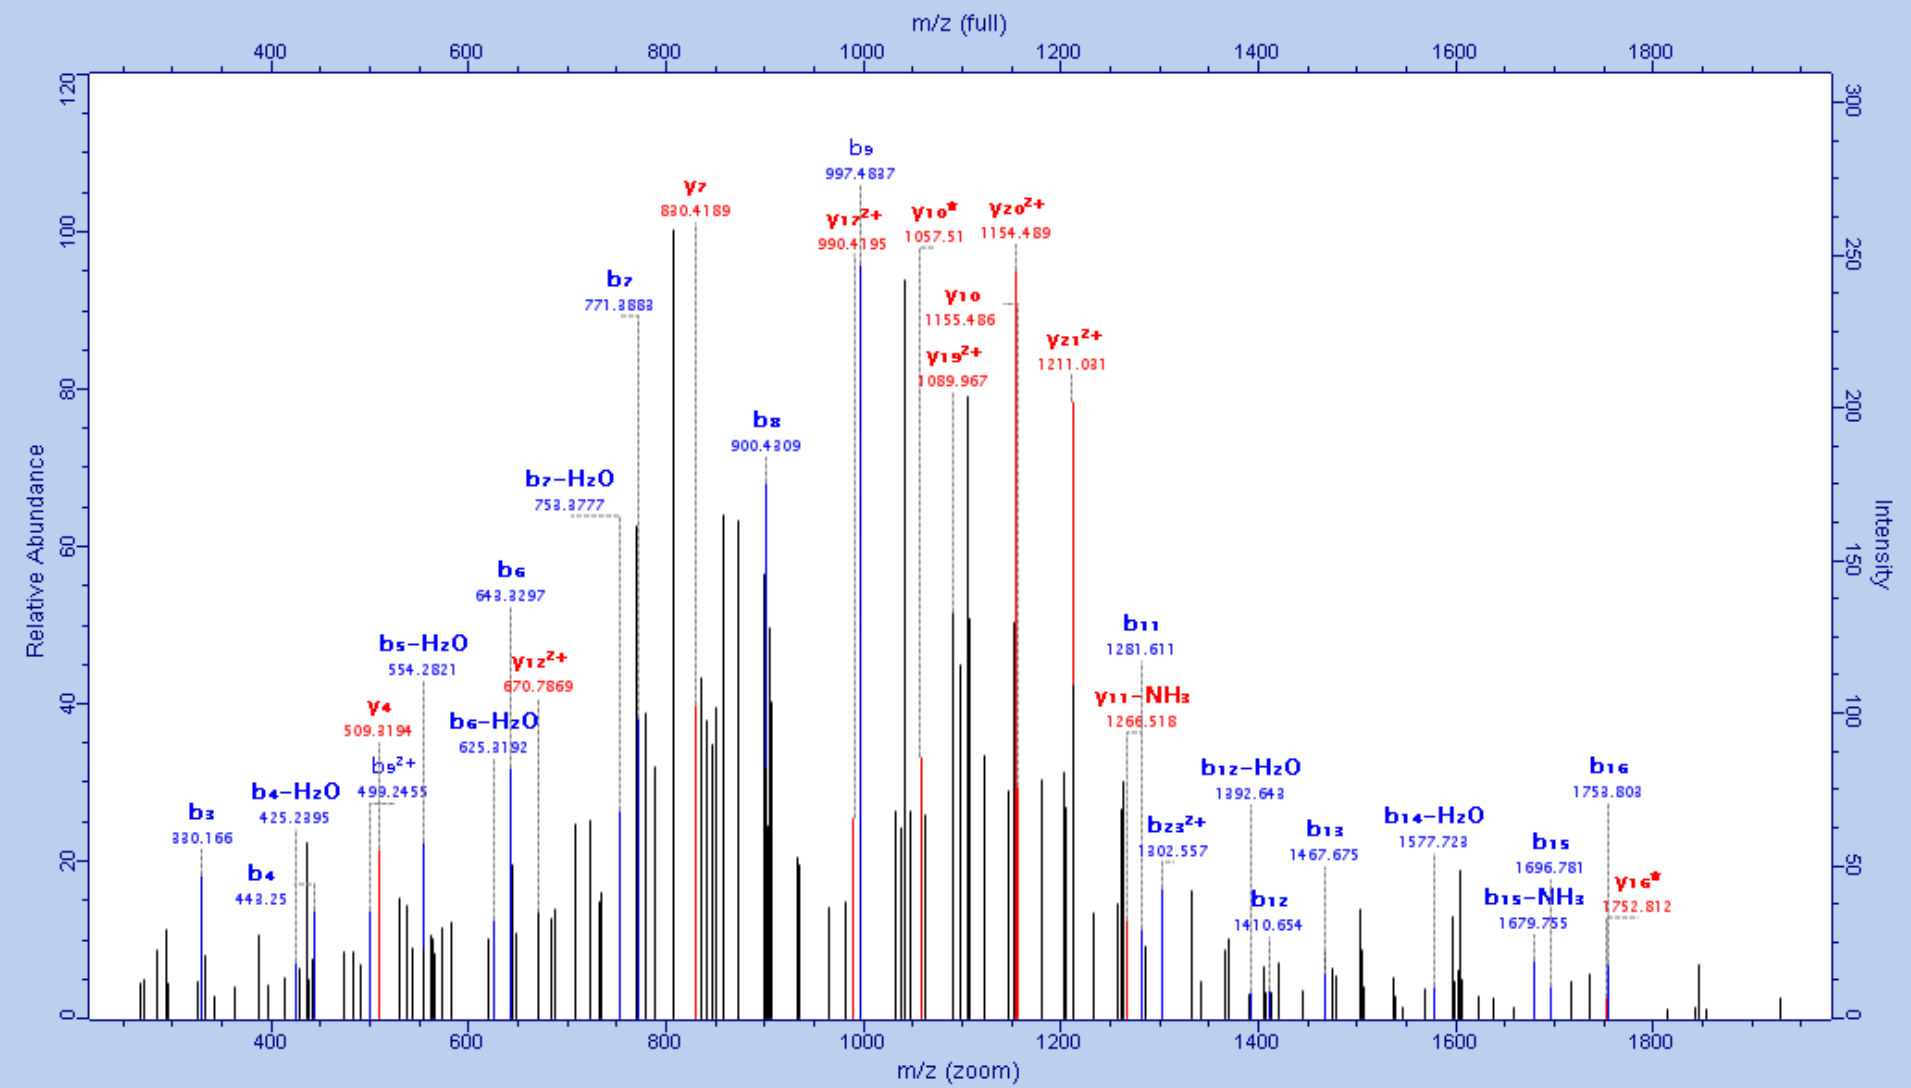

Protein: gil46199451  
 Score: 73.61  
 Source: service\_HB1\_090716155901  
 Scannumber: 3836  
 Method: ITMS; CID: 1

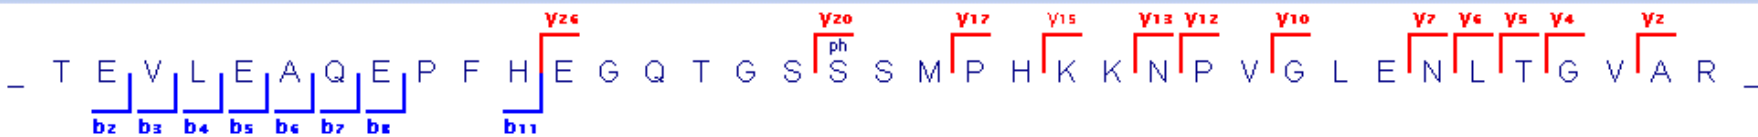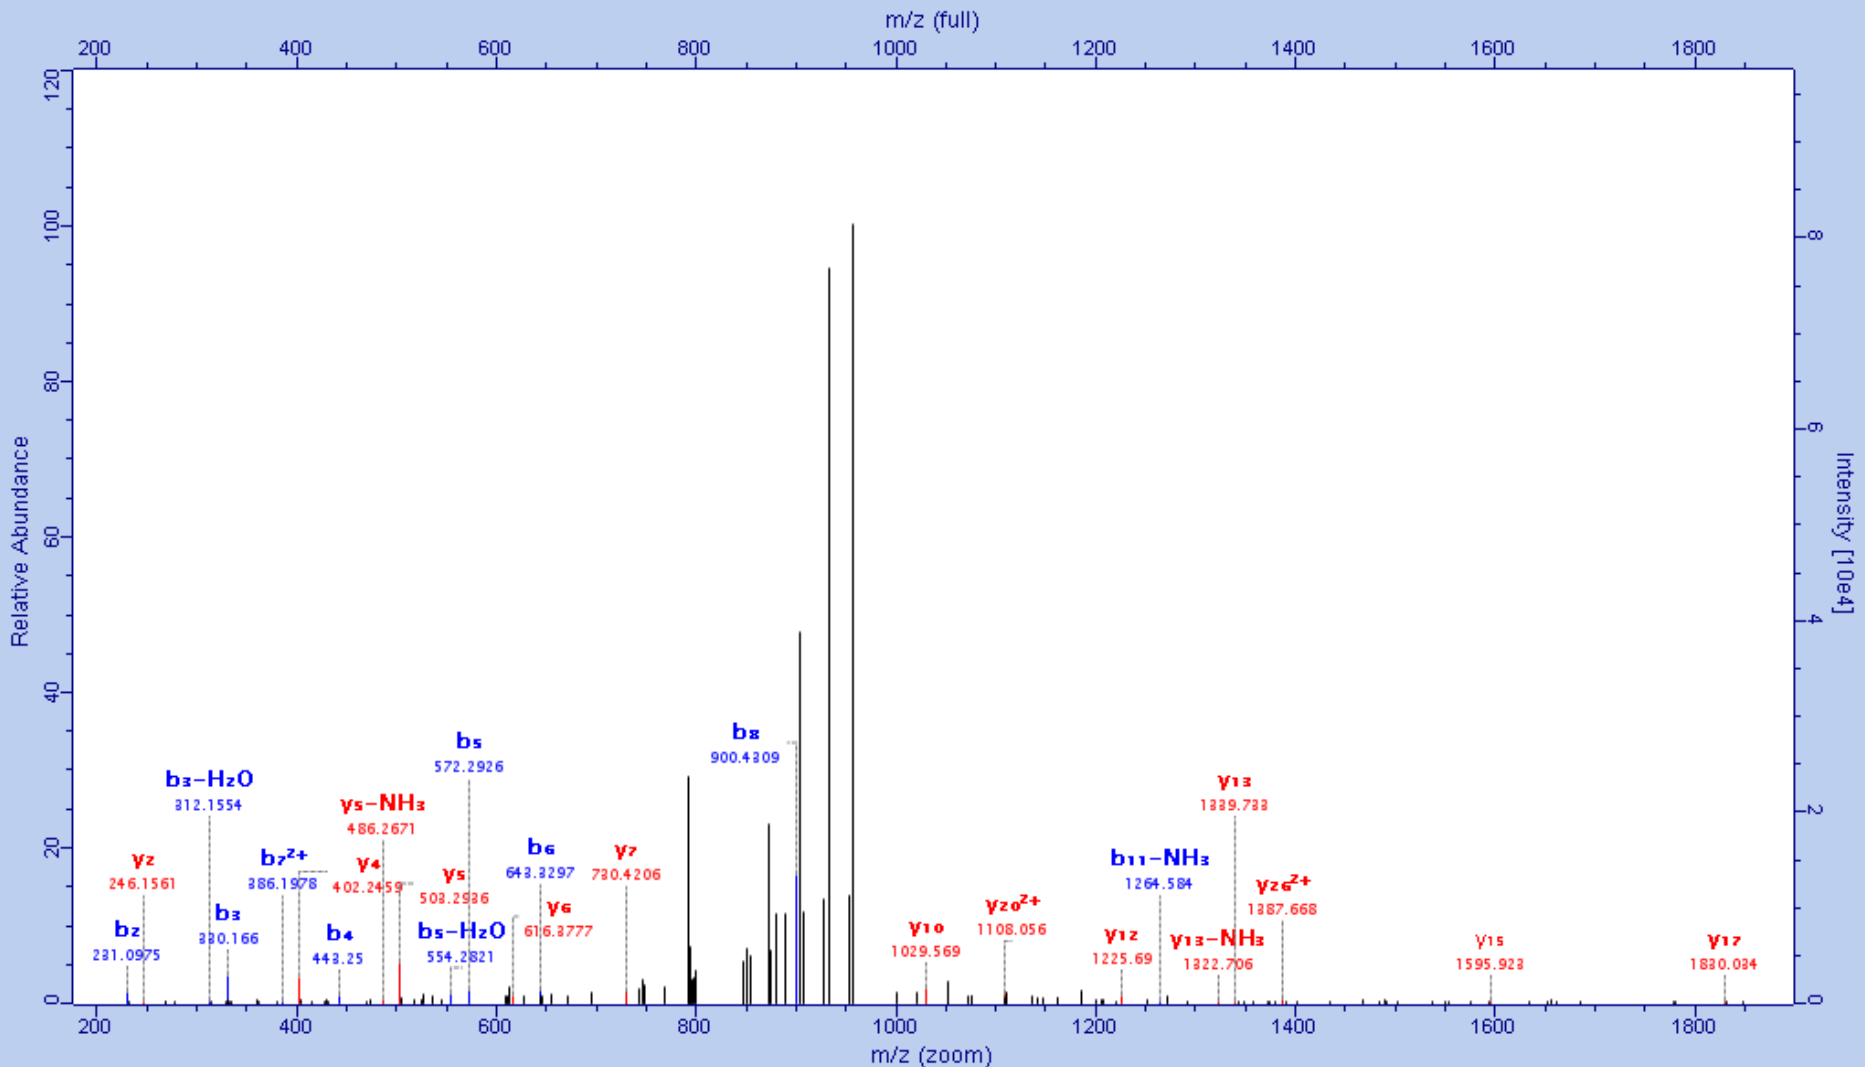

Protein: gil46139451  
 Score: 59.3  
 Source: service\_7\_090617070009  
 Scannumber: 5669  
 Method: ITMS; CID; 1

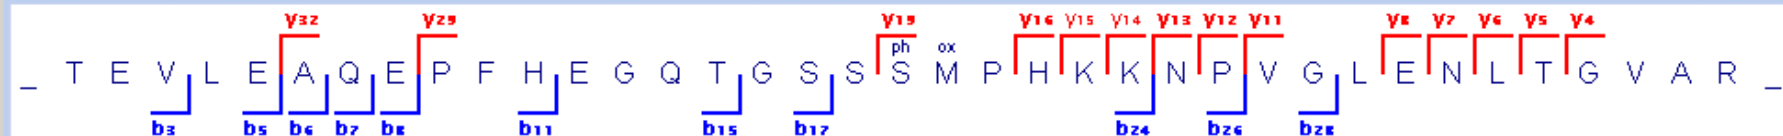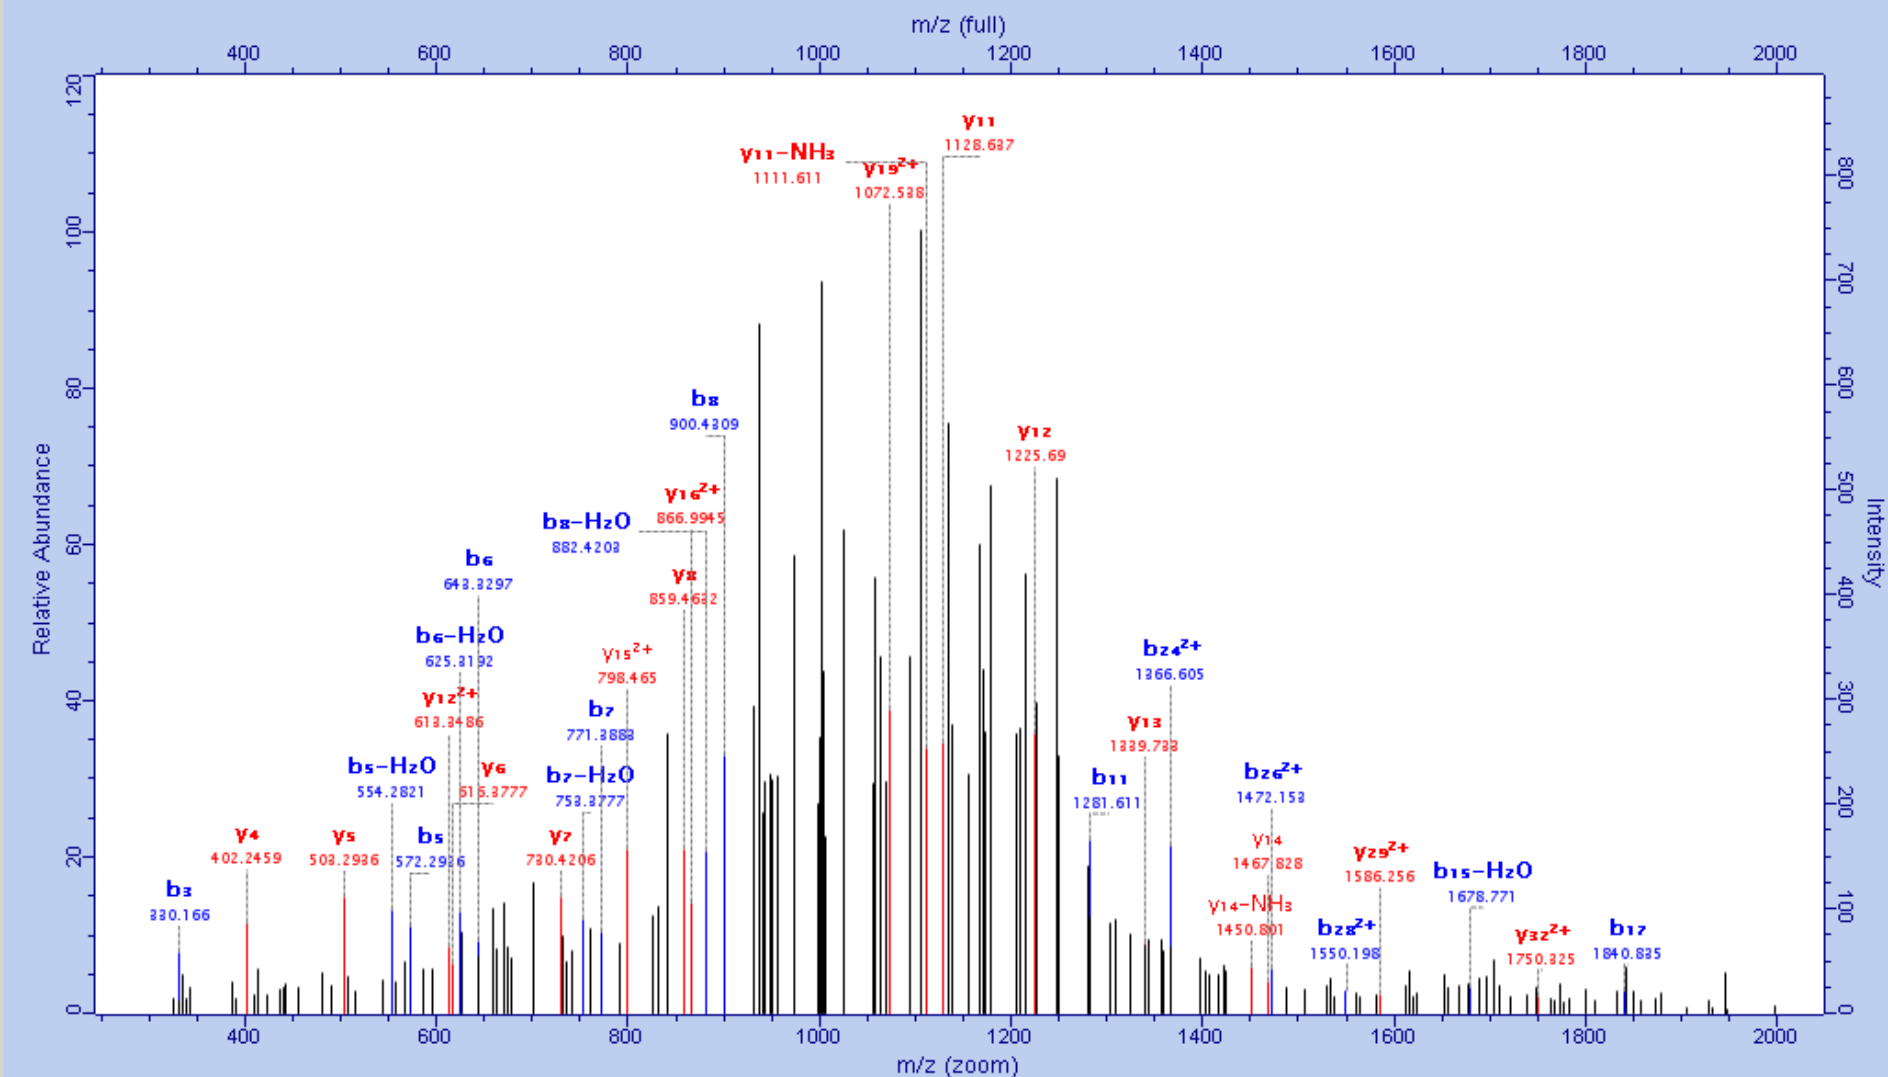

Protein: gil46199451  
 Score: 7.87  
 Source: service\_HB1\_090716155901  
 Scannumber: 2968  
 Method: ITMS; CID; 1

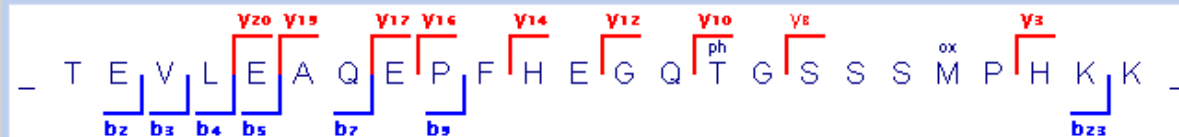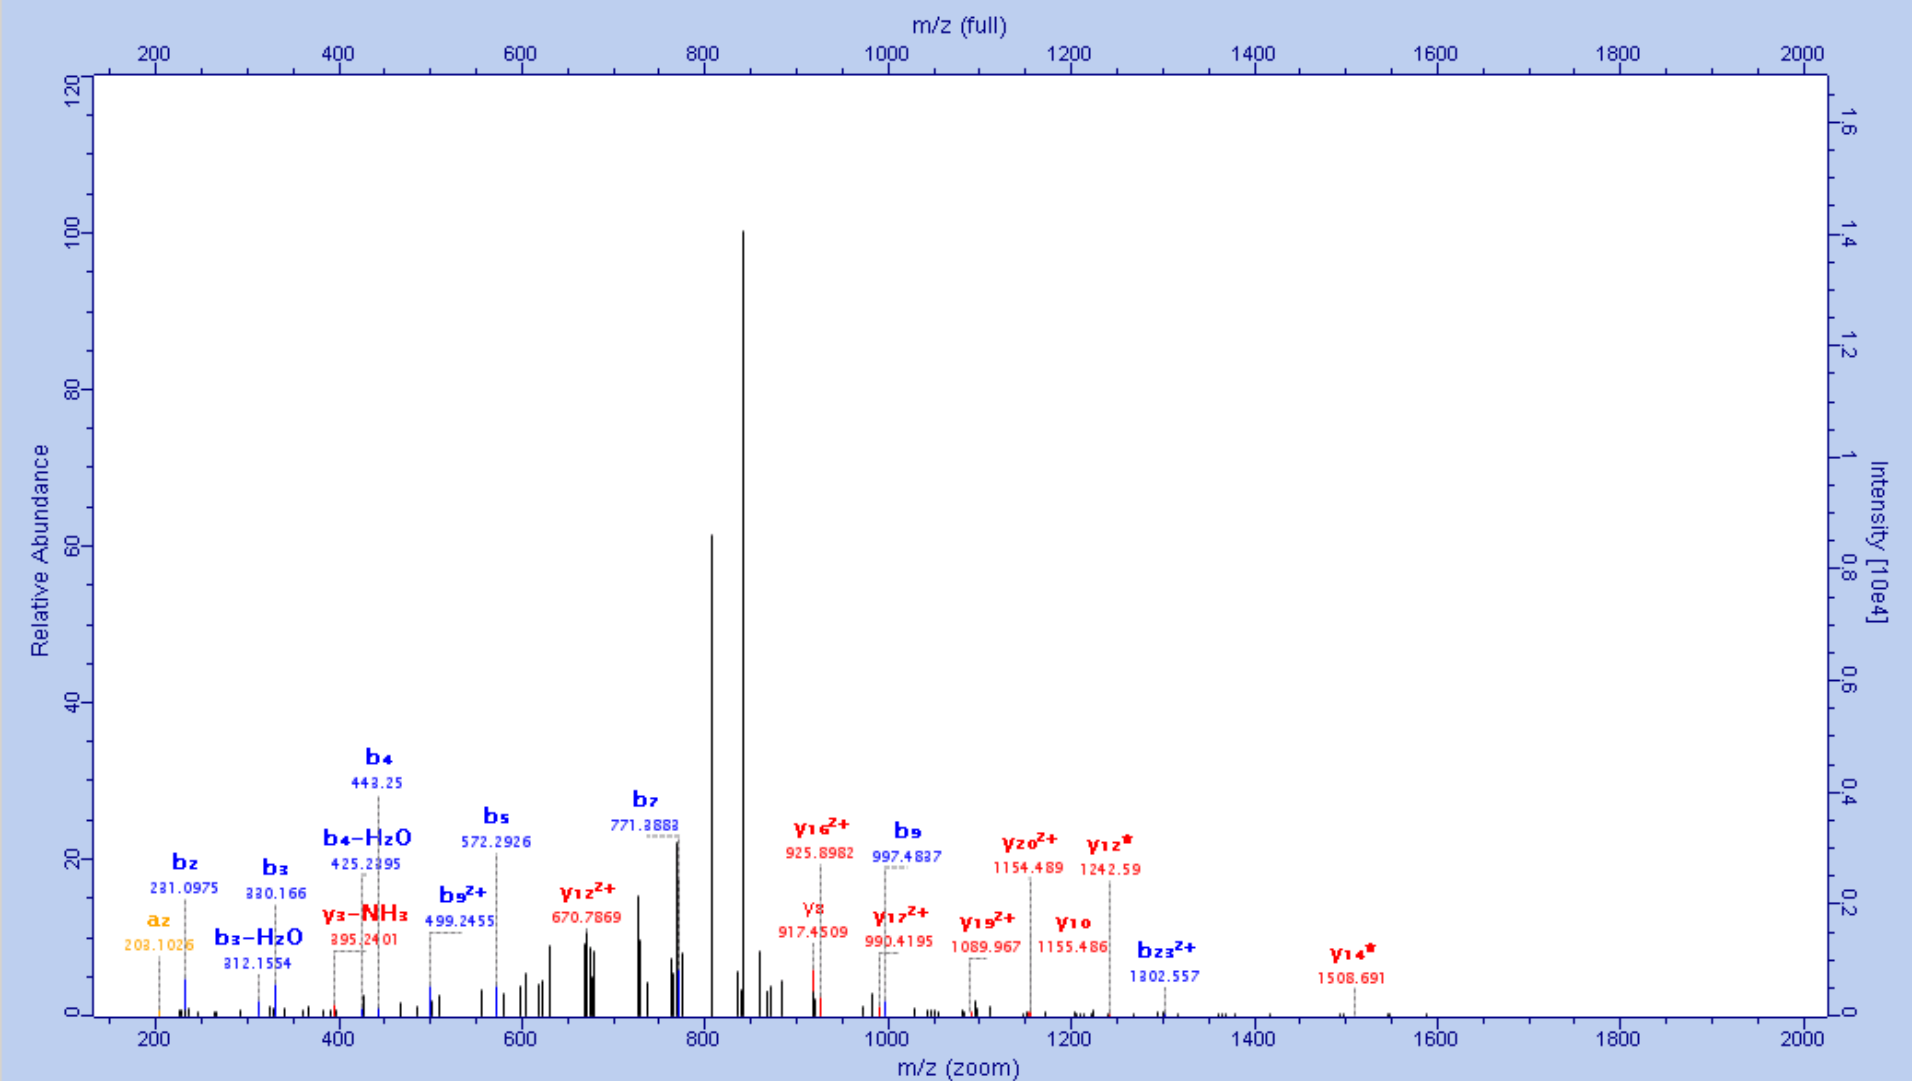

Protein: gil46199451  
Score: 31.01  
Source: service\_HB2  
Scannumber: 4682  
Method: ITMS; CID; 1

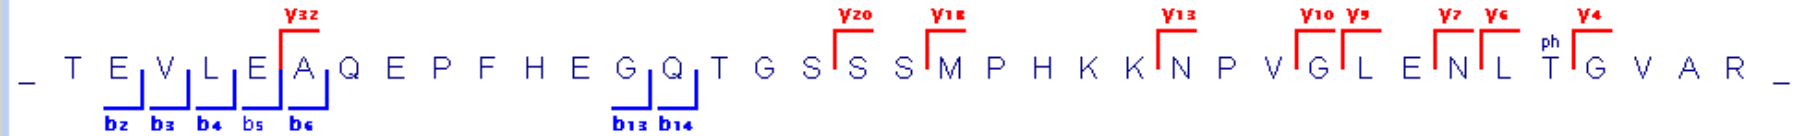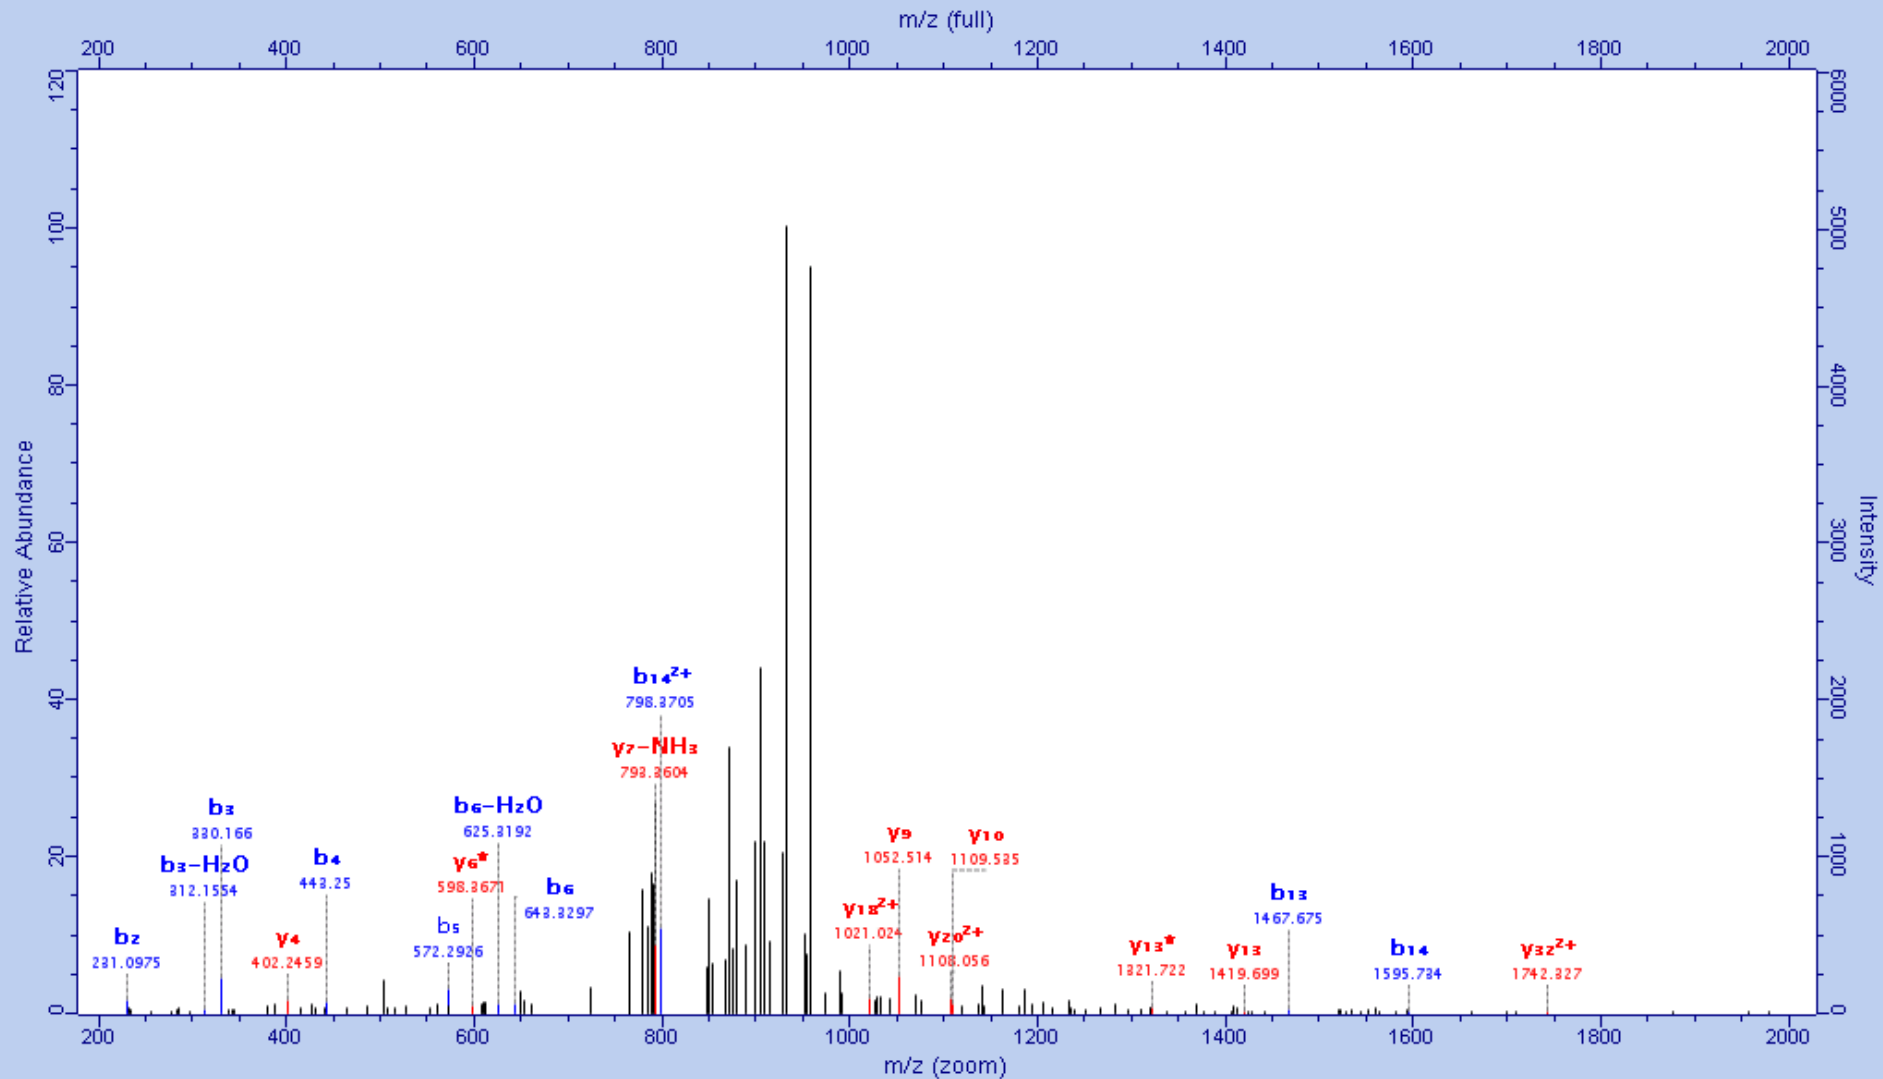



Protein: gil46199632; gil46200036  
Score: 23.7  
Source: service\_HB11  
Scannumber: 1631  
Method: ITMS; CID: 1

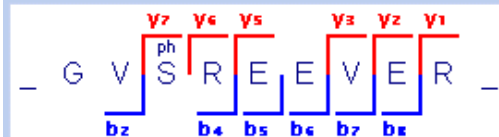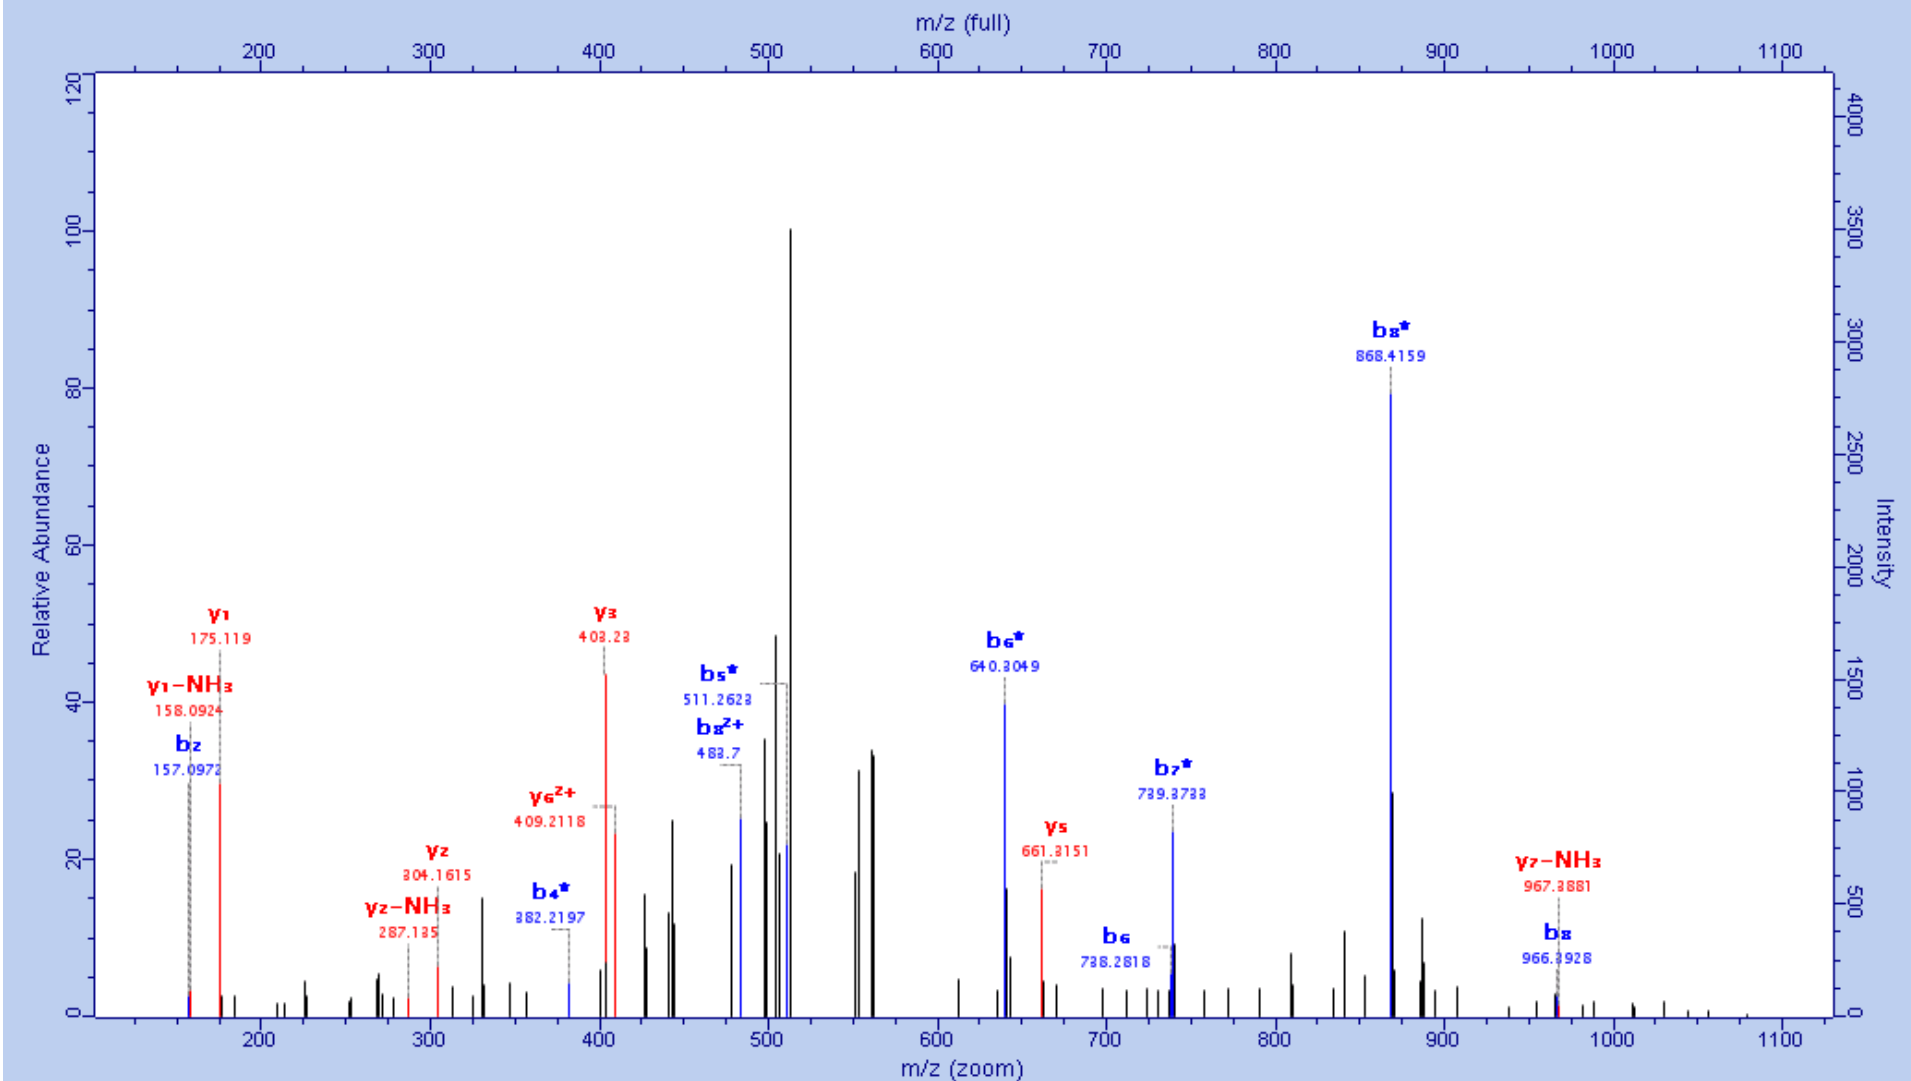

Protein: gil46199653  
Score: 11.04  
Source: service\_HB5  
Scannumber: 1415  
Method: ITMS; CID; 1

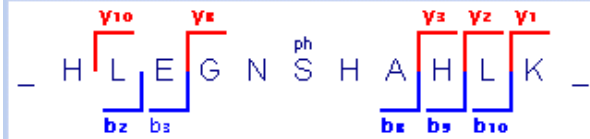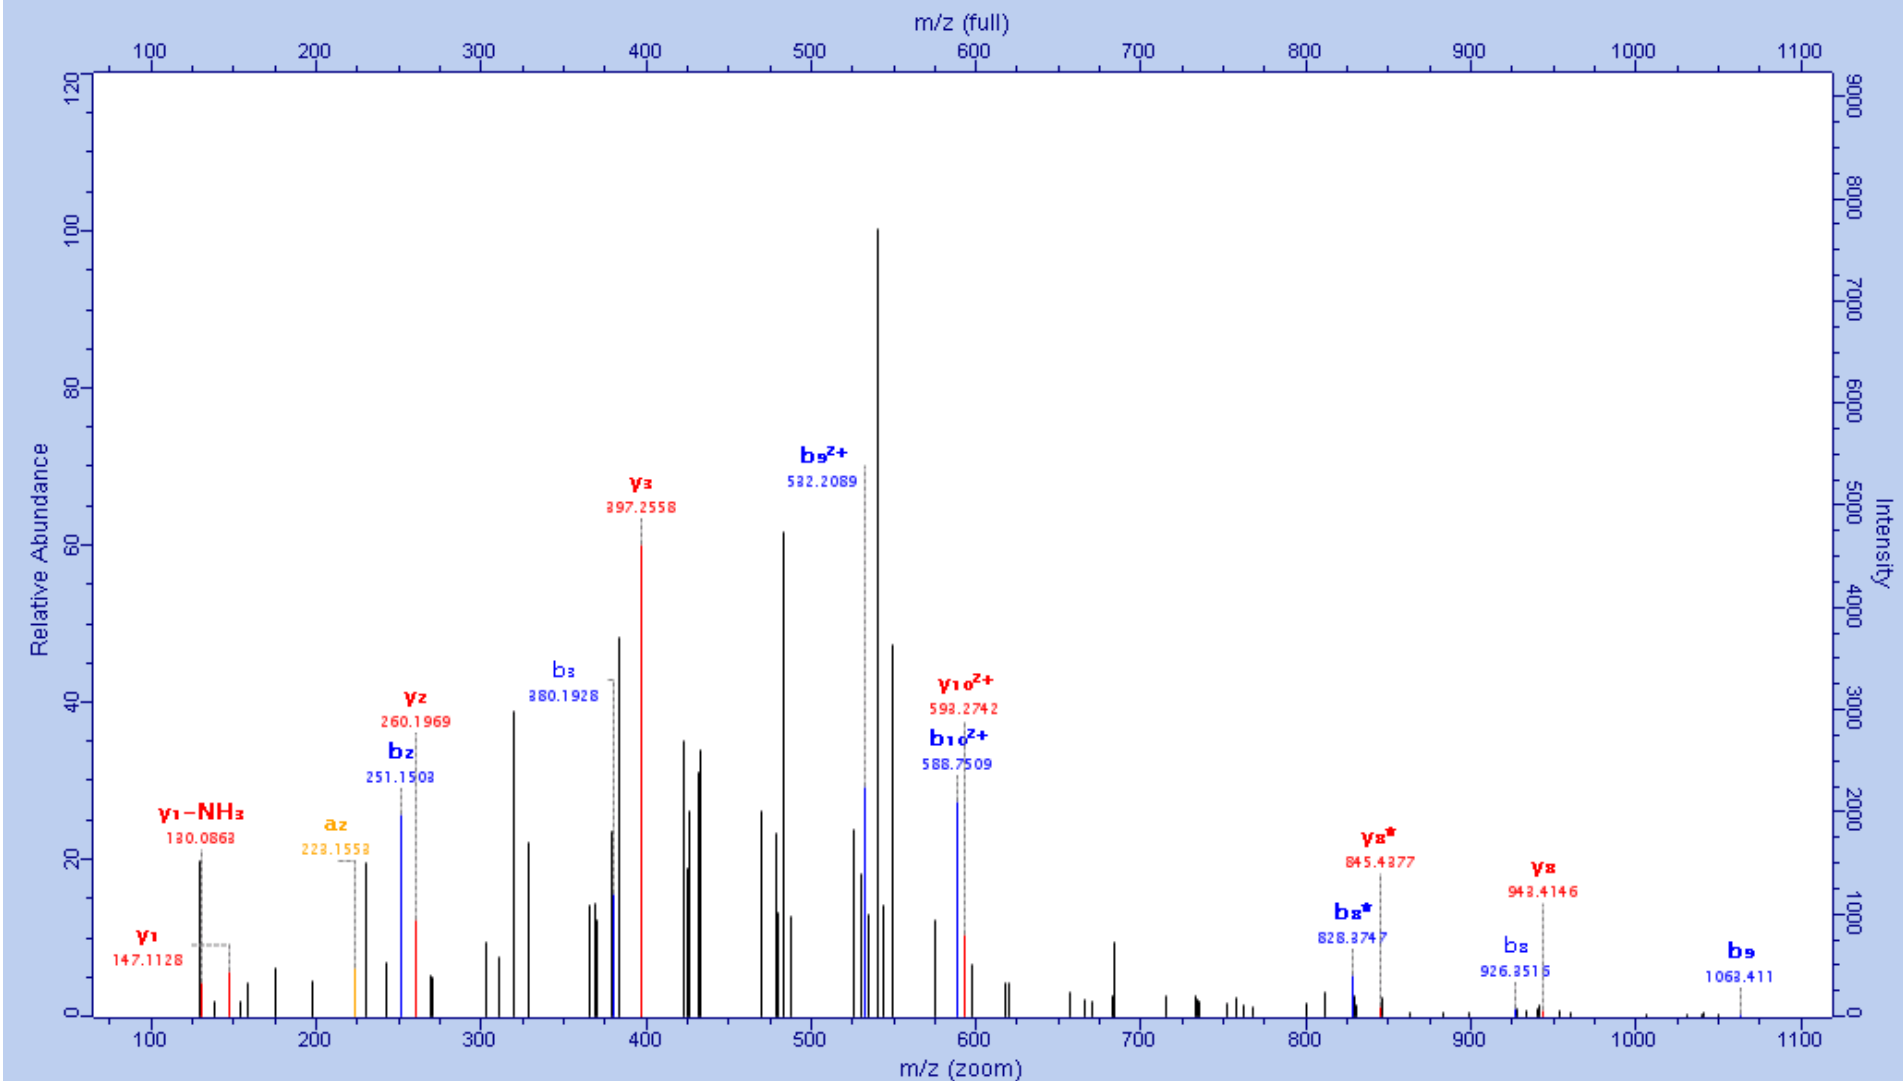

Protein: gil46199683  
Score: 58.55  
Source: AWAN-FT\_090928  
Scannumber: 3949  
Method: ITMS; CID; 1

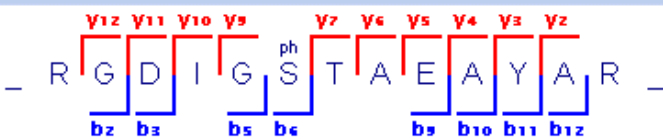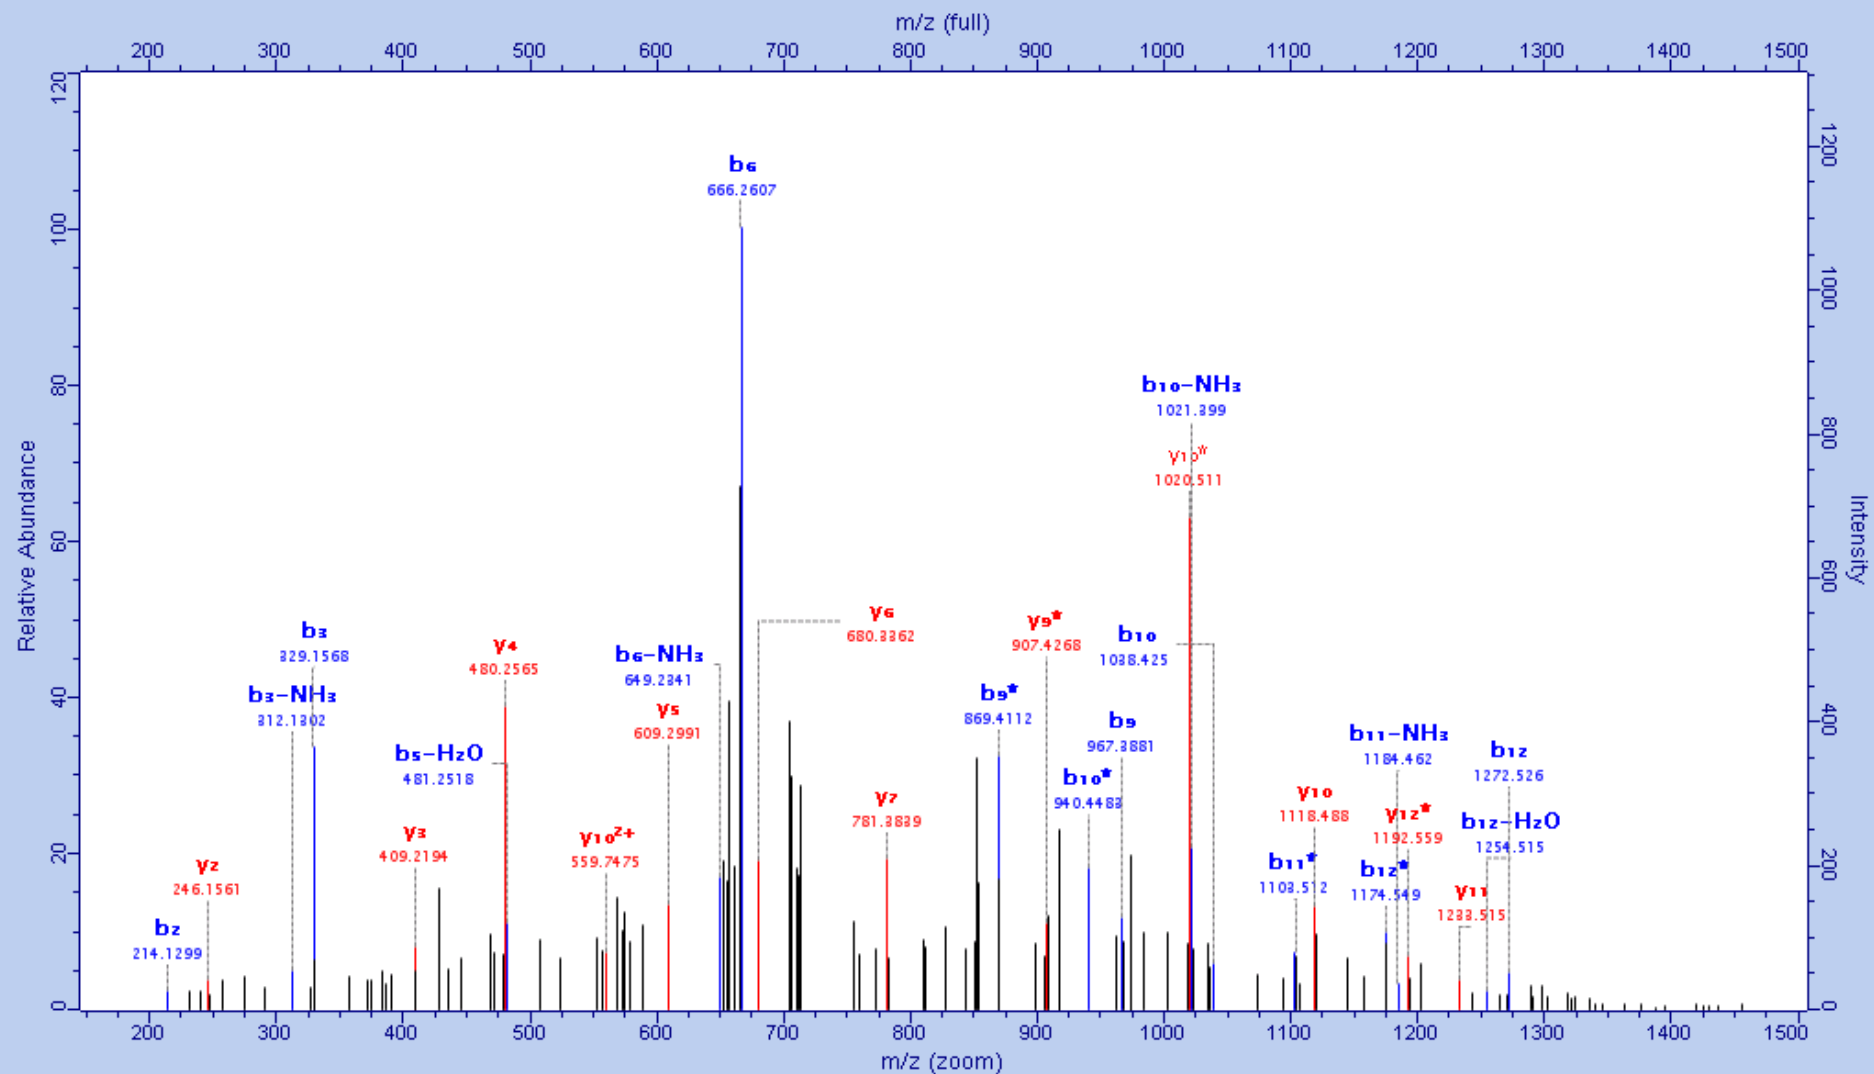

Protein: gil46199716  
 Score: 147.45  
 Source: AWAN-FT\_090928  
 Scannumber: 2473  
 Method: ITMS; CID; 1

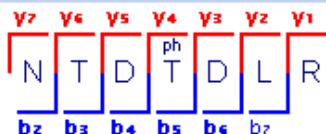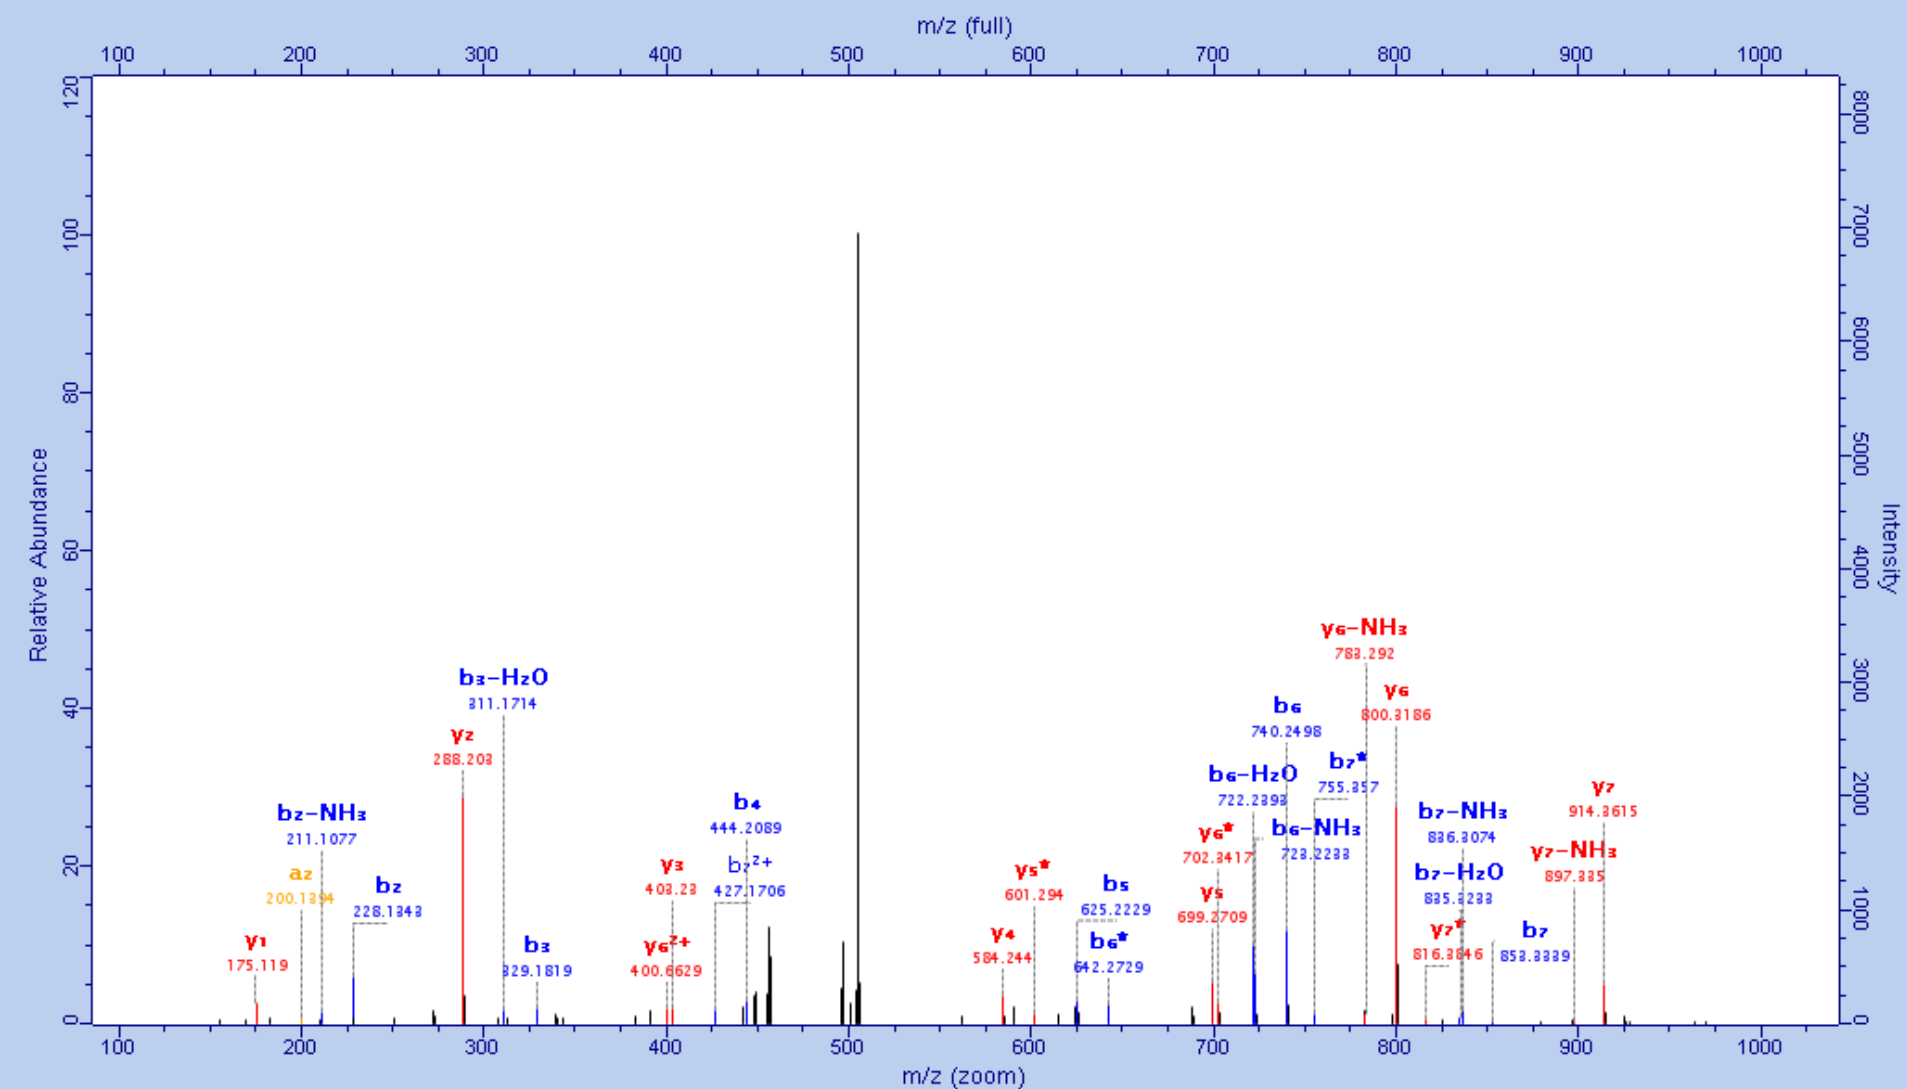

Protein: gil46199722  
 Score: 56.69  
 Source: service\_HB4  
 Scannumber: 2083  
 Method: ITMS; CID; 1

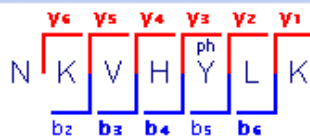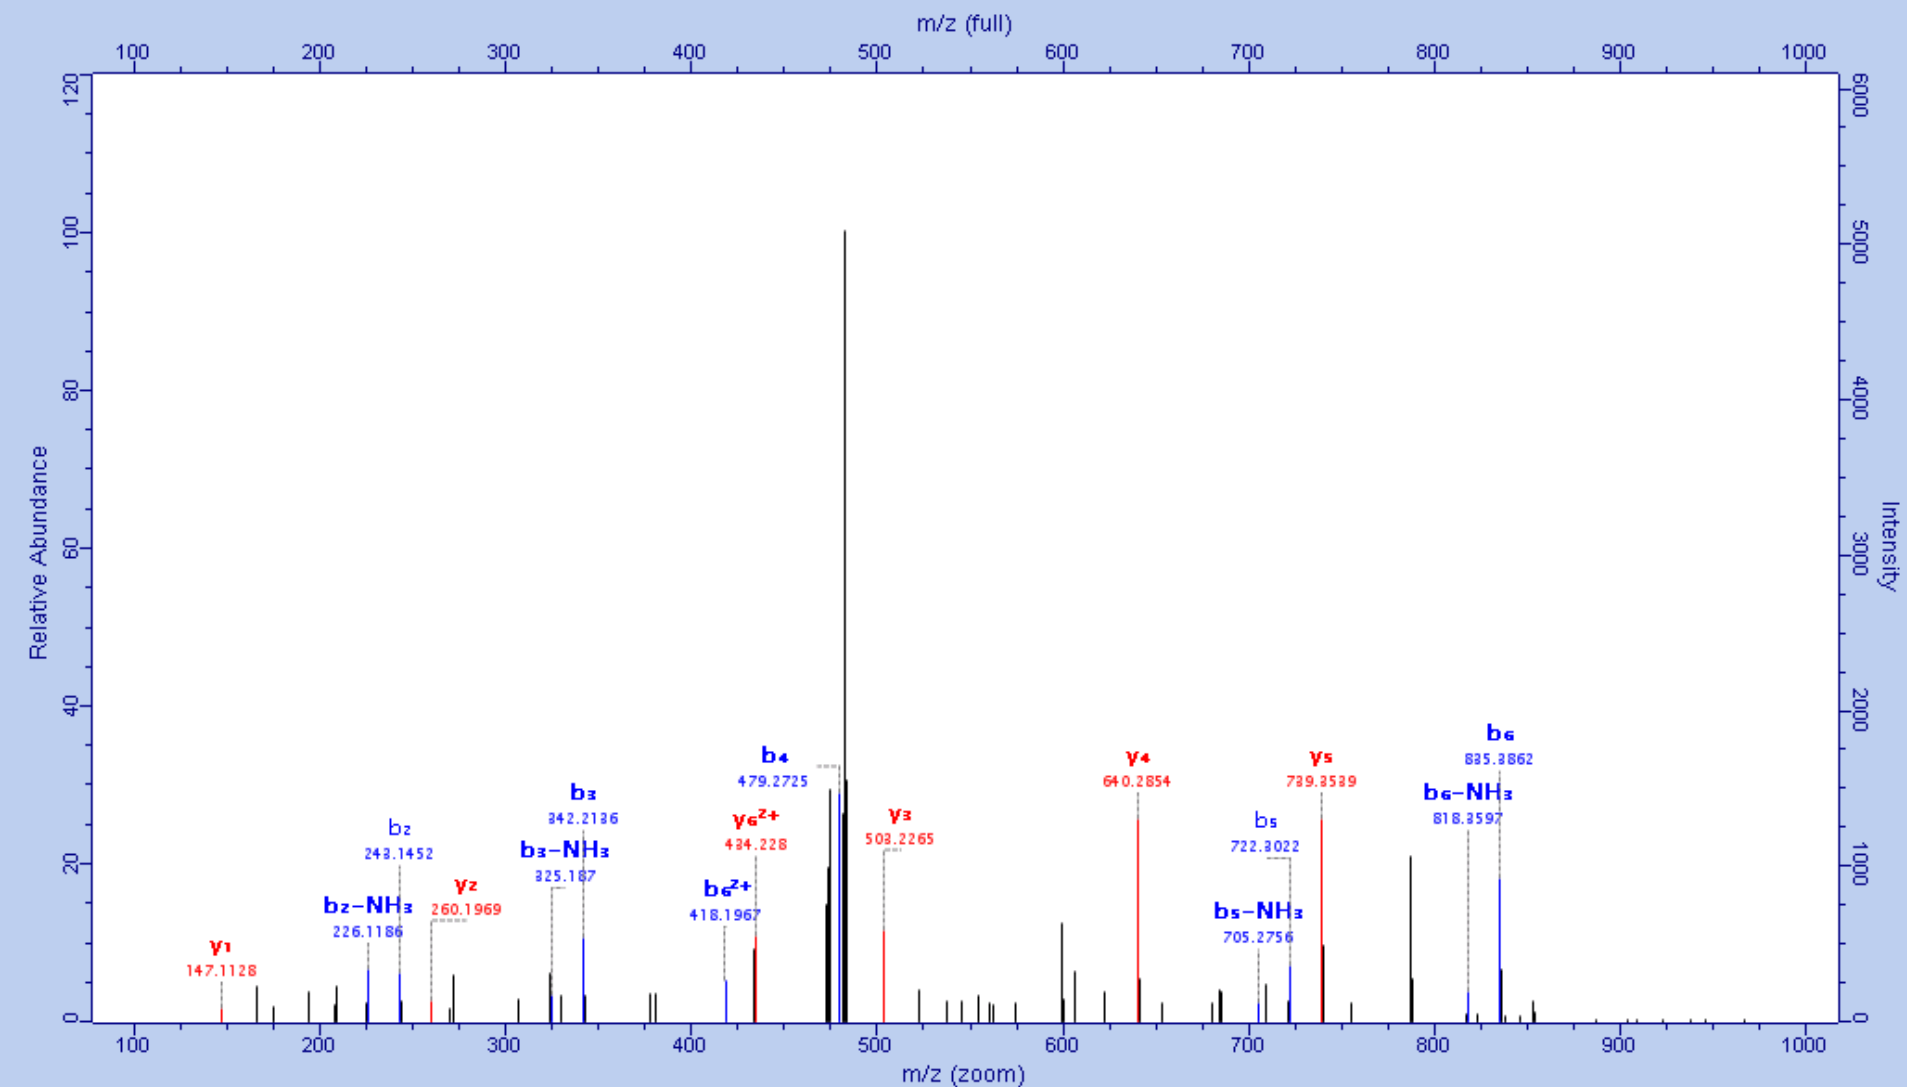

Protein: gil46199790  
Score: 19.5  
Source: AWAN-FT\_090928  
Scannumber: 3390  
Method: ITMS; CID; 1

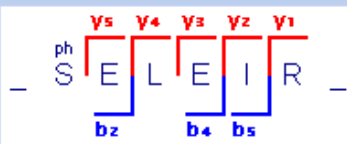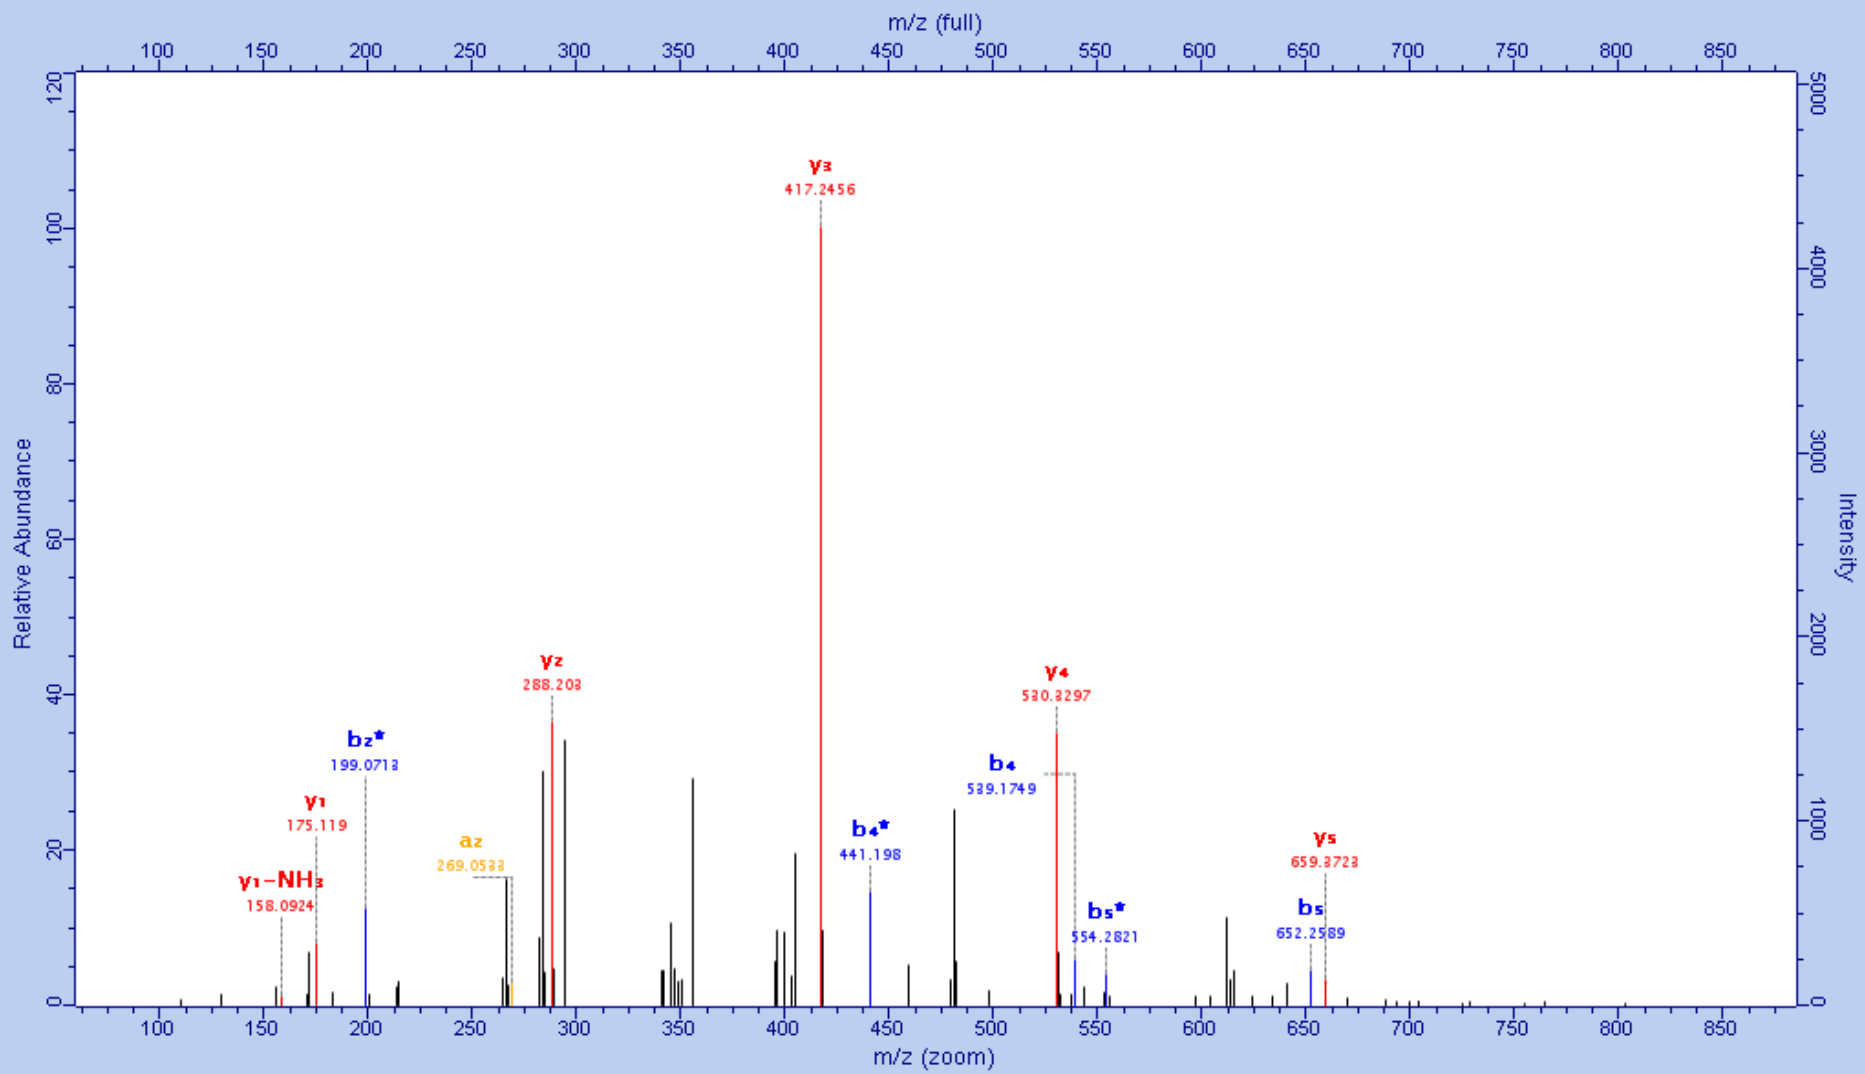

Protein: gil46199843  
 Score: 28.86  
 Source: service\_HB6  
 Scannumber: 3681  
 Method: ITMS; CID; 1

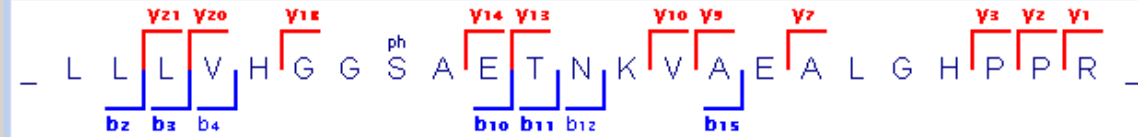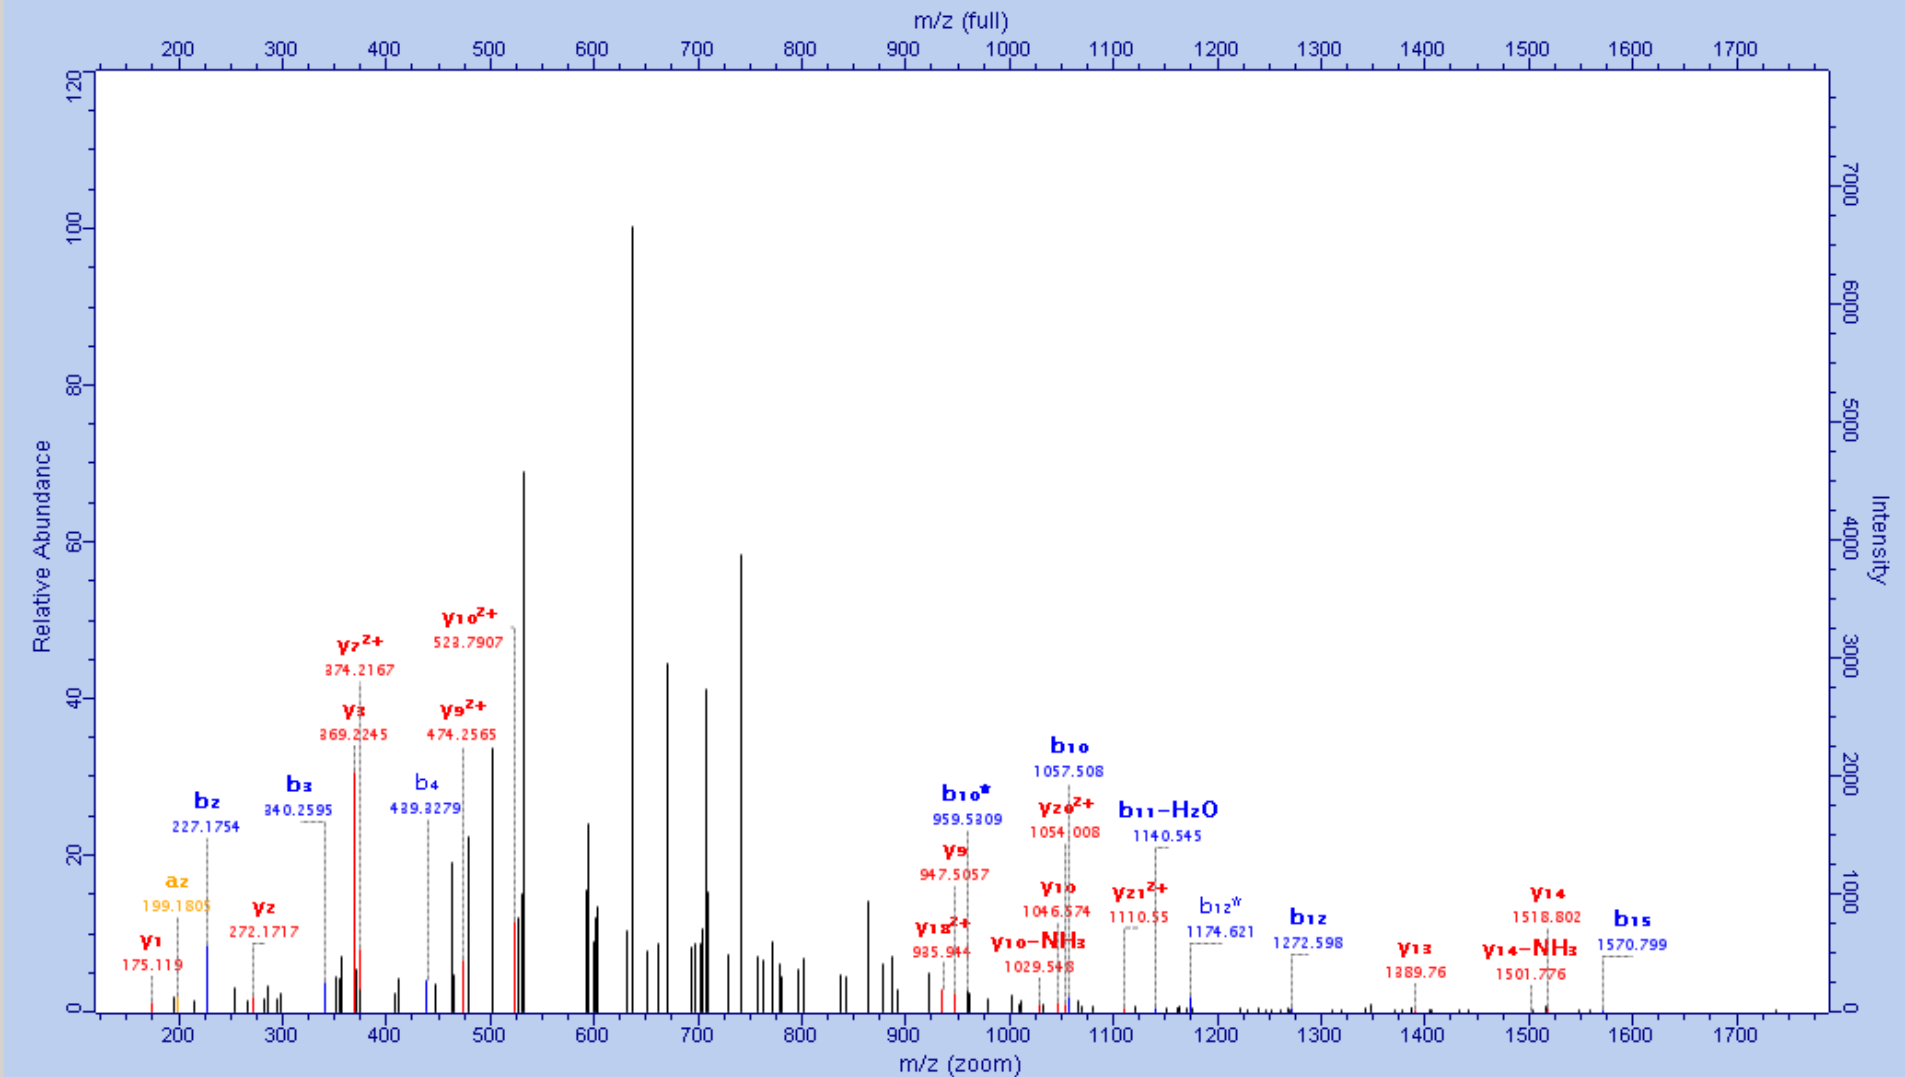

Protein: gil46199902  
 Score: 33.65  
 Source: service\_HB7  
 Scannumber: 5438  
 Method: ITMS; CID: 1

- L D H I Q D I G D V P E G V K Q E I Q H F F E T Y K A L E A K -  
 b<sub>2</sub> b<sub>3</sub> b<sub>4</sub> b<sub>5</sub> b<sub>6</sub> b<sub>7</sub> b<sub>8</sub> b<sub>9</sub> b<sub>10</sub> b<sub>12</sub> b<sub>14</sub>  
 y<sub>12</sub> y<sub>11</sub> y<sub>10</sub> y<sub>8</sub> y<sub>5</sub> y<sub>3</sub> y<sub>2</sub>  
 y<sub>22</sub> y<sub>20</sub>  
 ph

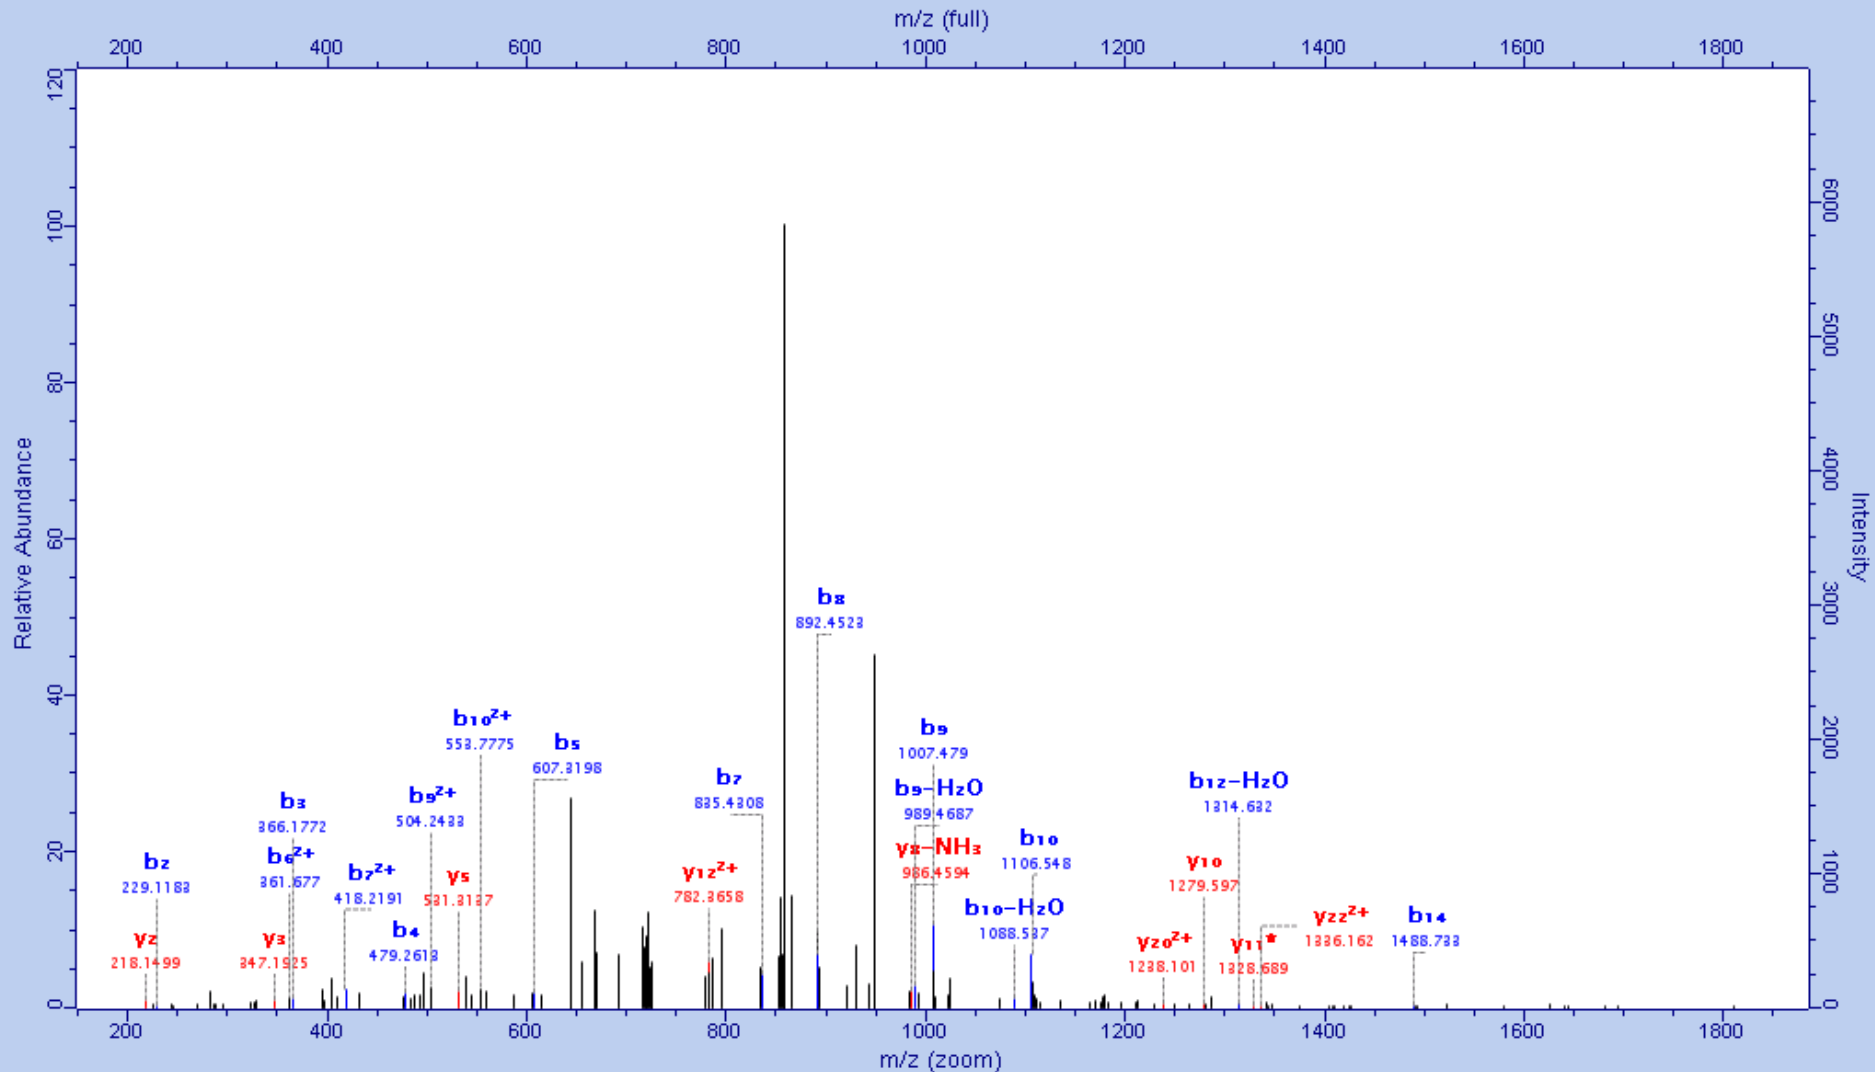



Protein: gil46199902  
 Score: 61.68  
 Source: service\_HB4  
 Scannumber: 6156  
 Method: ITMS; CID; 1

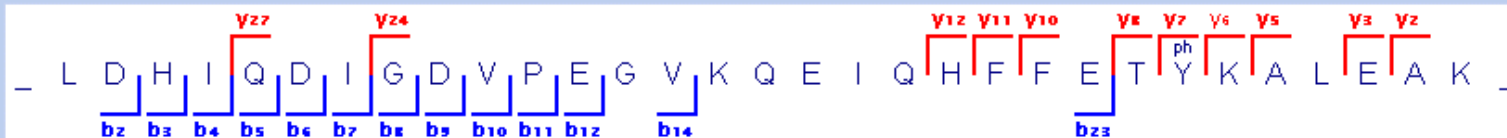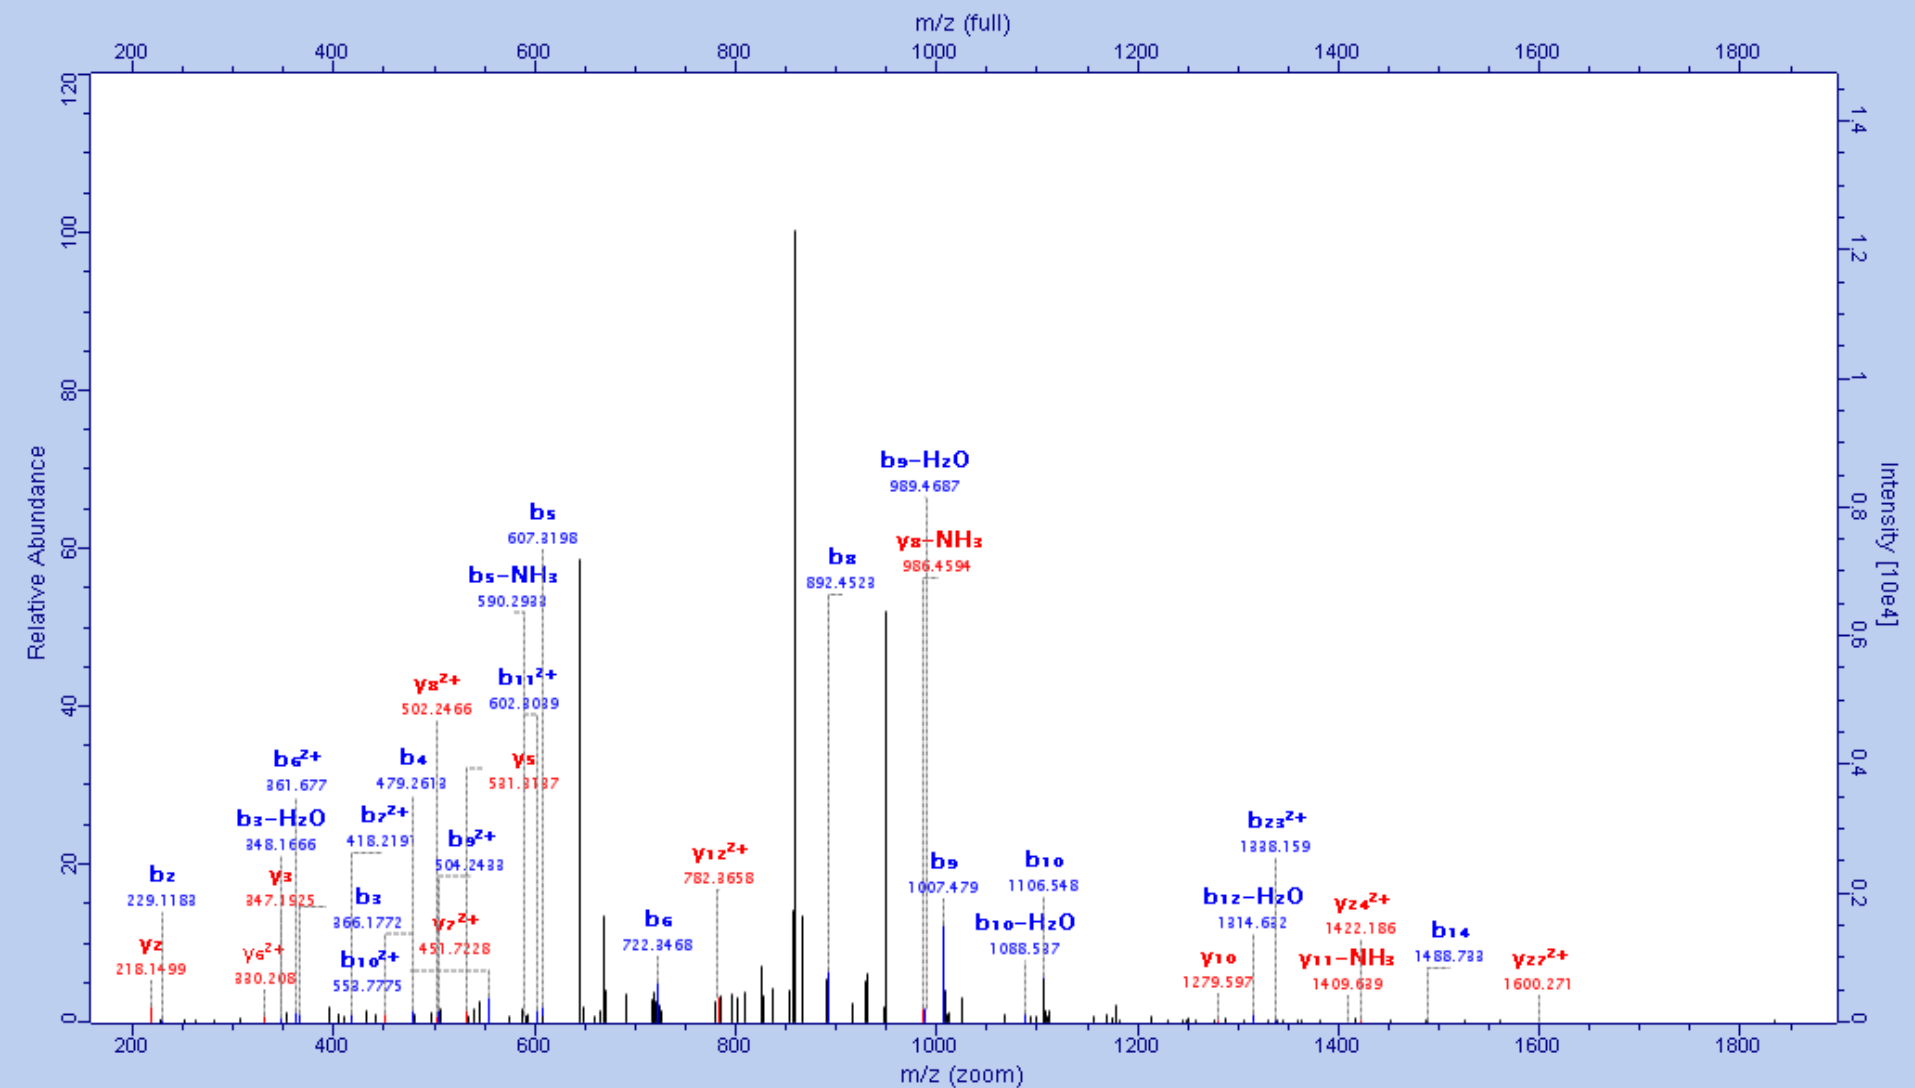

Protein: gil46199903  
 Score: 71.95  
 Source: AWAN-FT\_090928  
 Scannumber: 6652  
 Method: ITMS; CID; 1

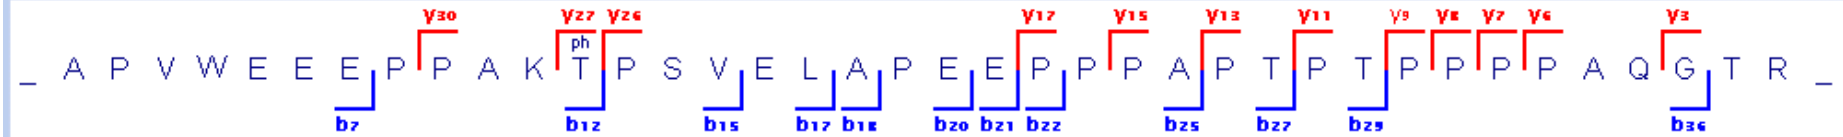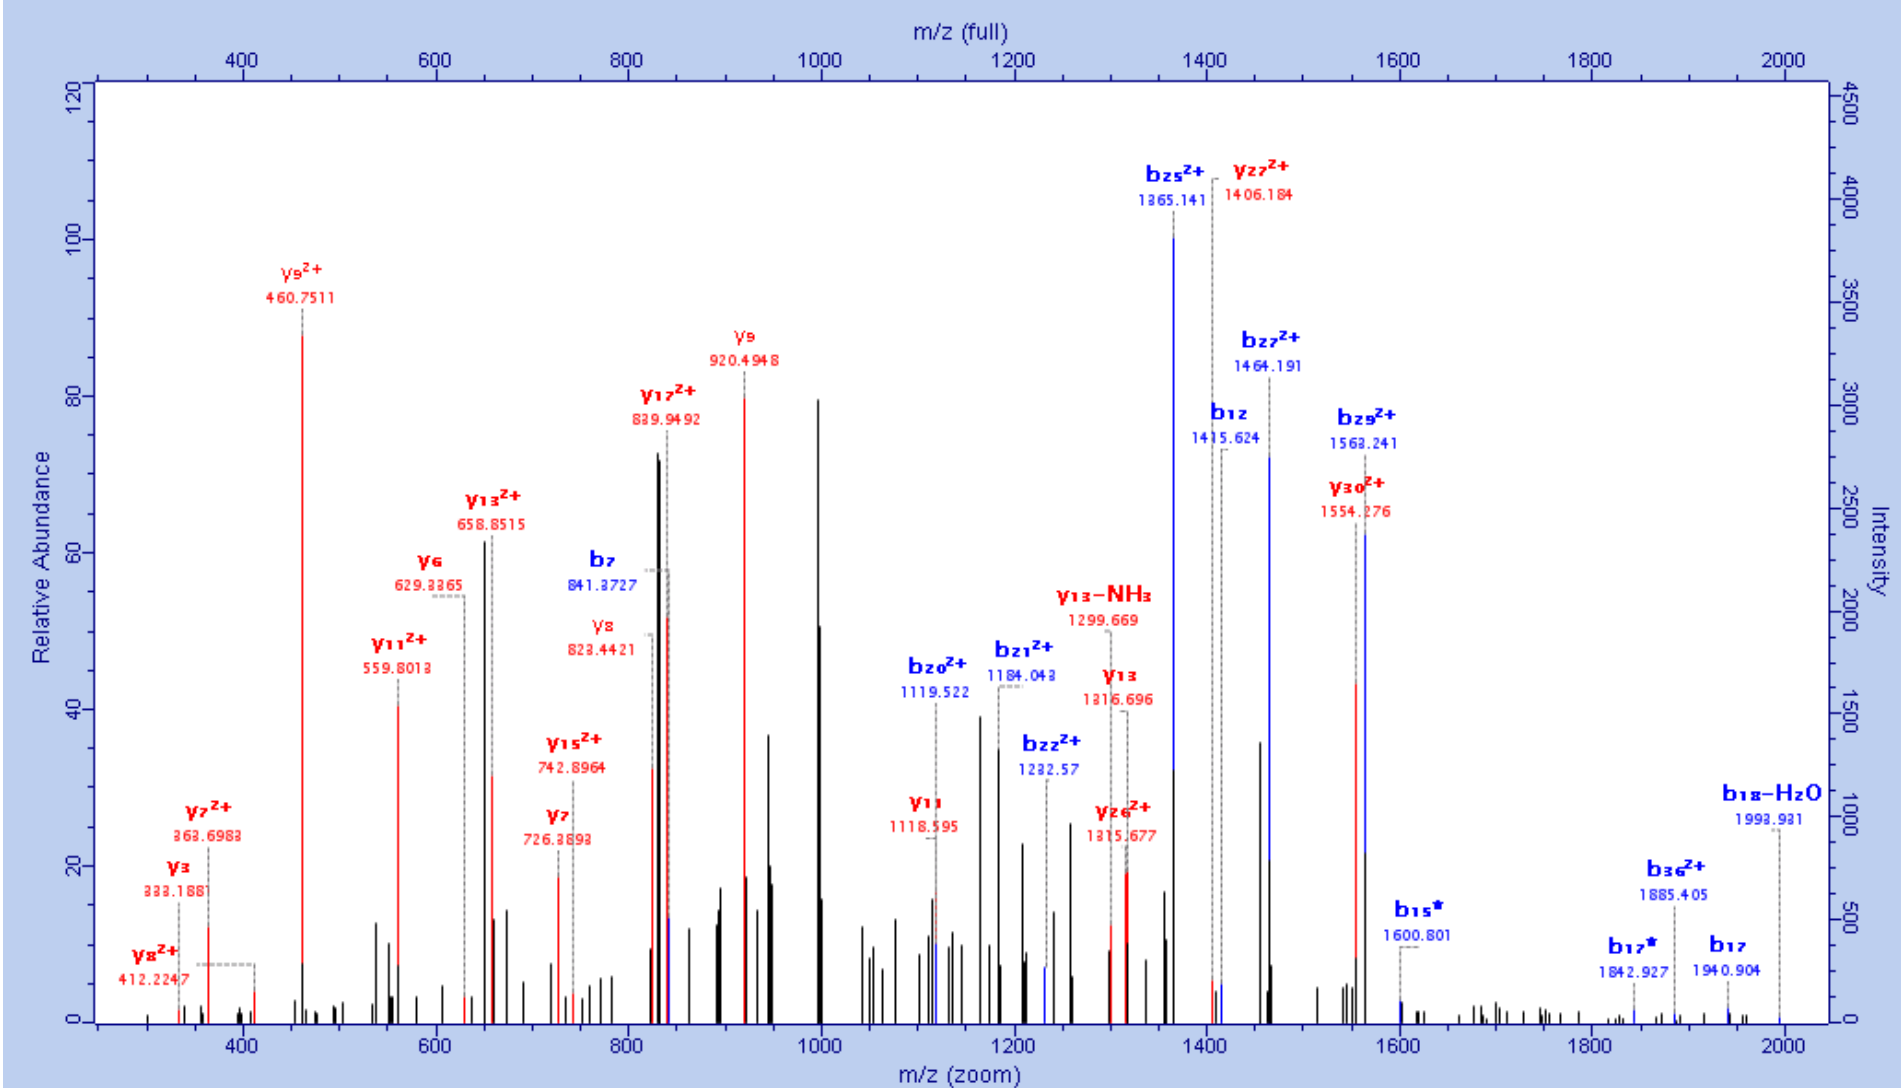

Protein: gil46199903  
 Score: 10.23  
 Source: service\_HB14  
 Scannumber: 1830  
 Method: ITMS; CID; 1

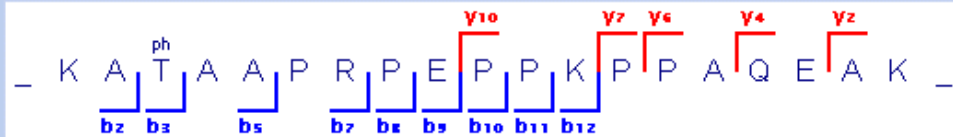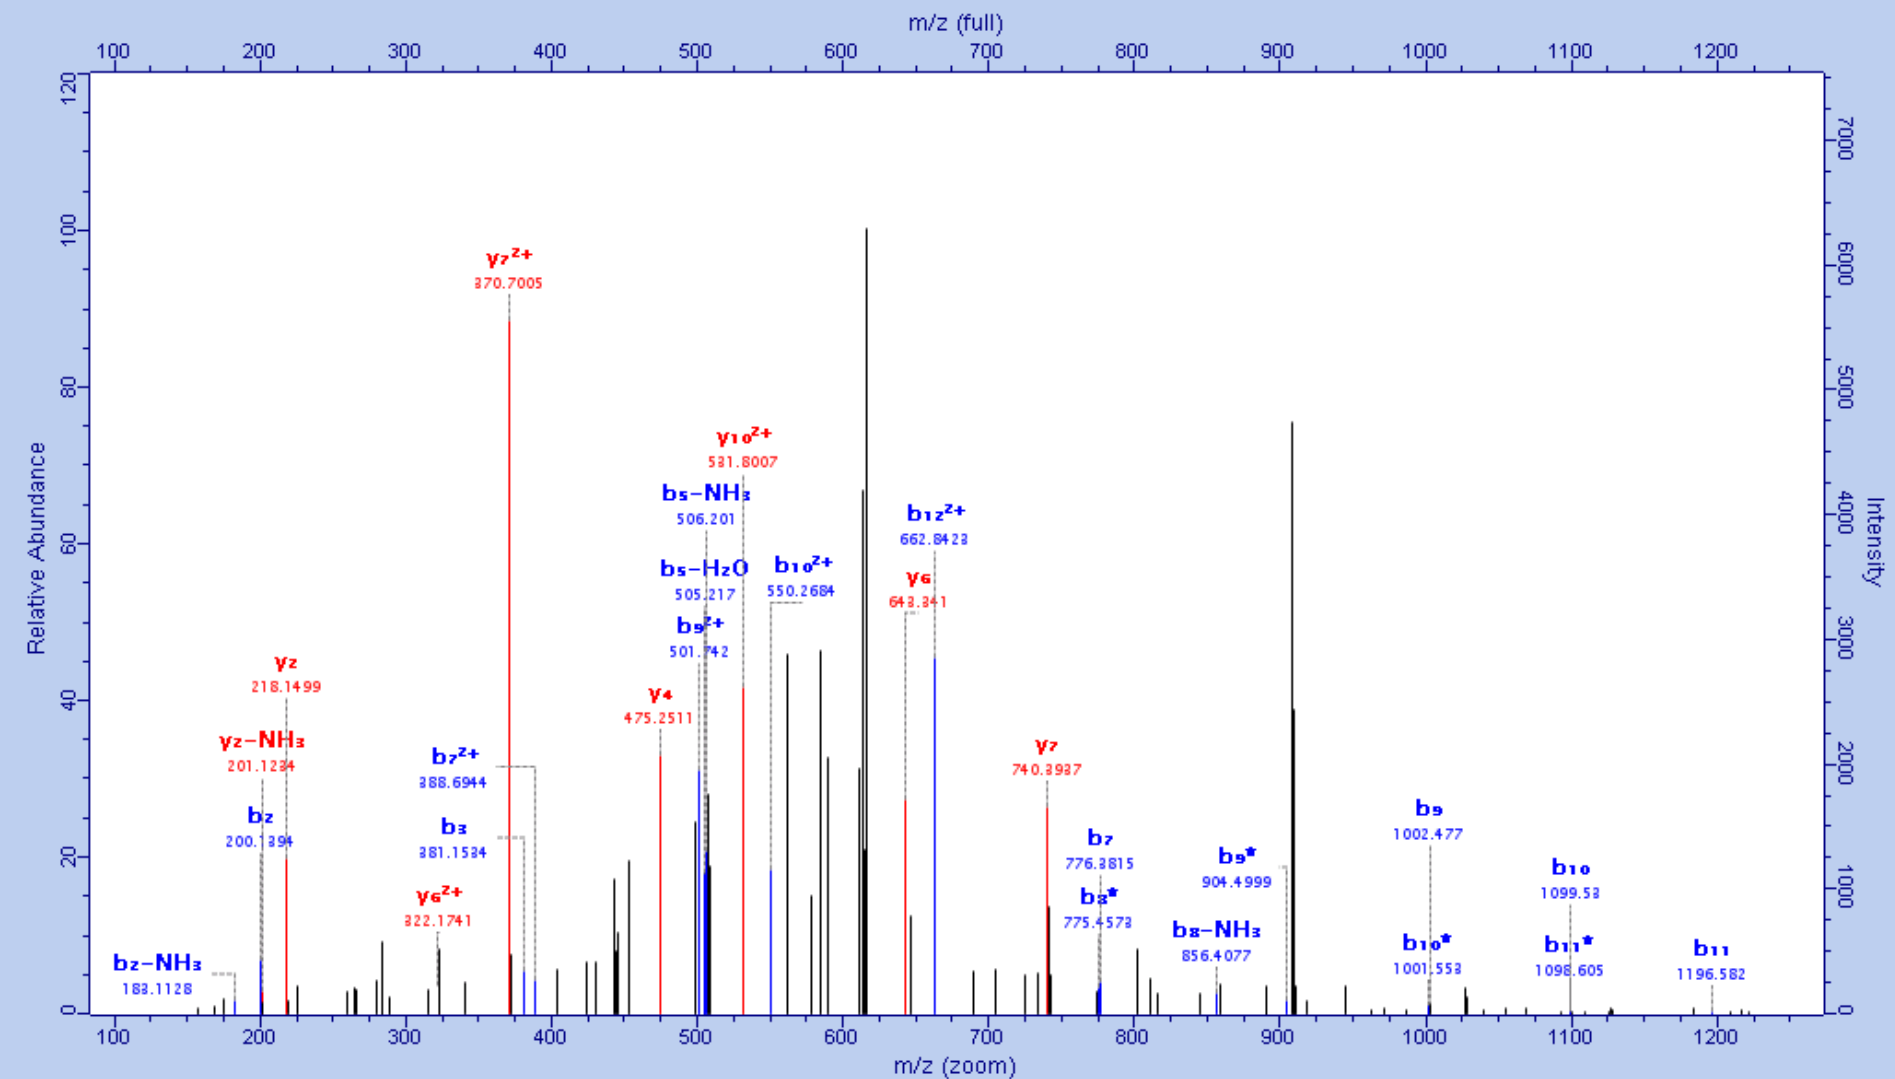

Protein: gil46199913  
Score: 0  
Source: service\_HB12  
Scannumber: 3874  
Method: ITMS; CID: 1

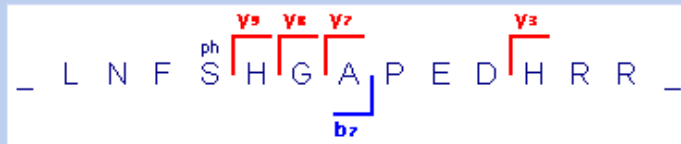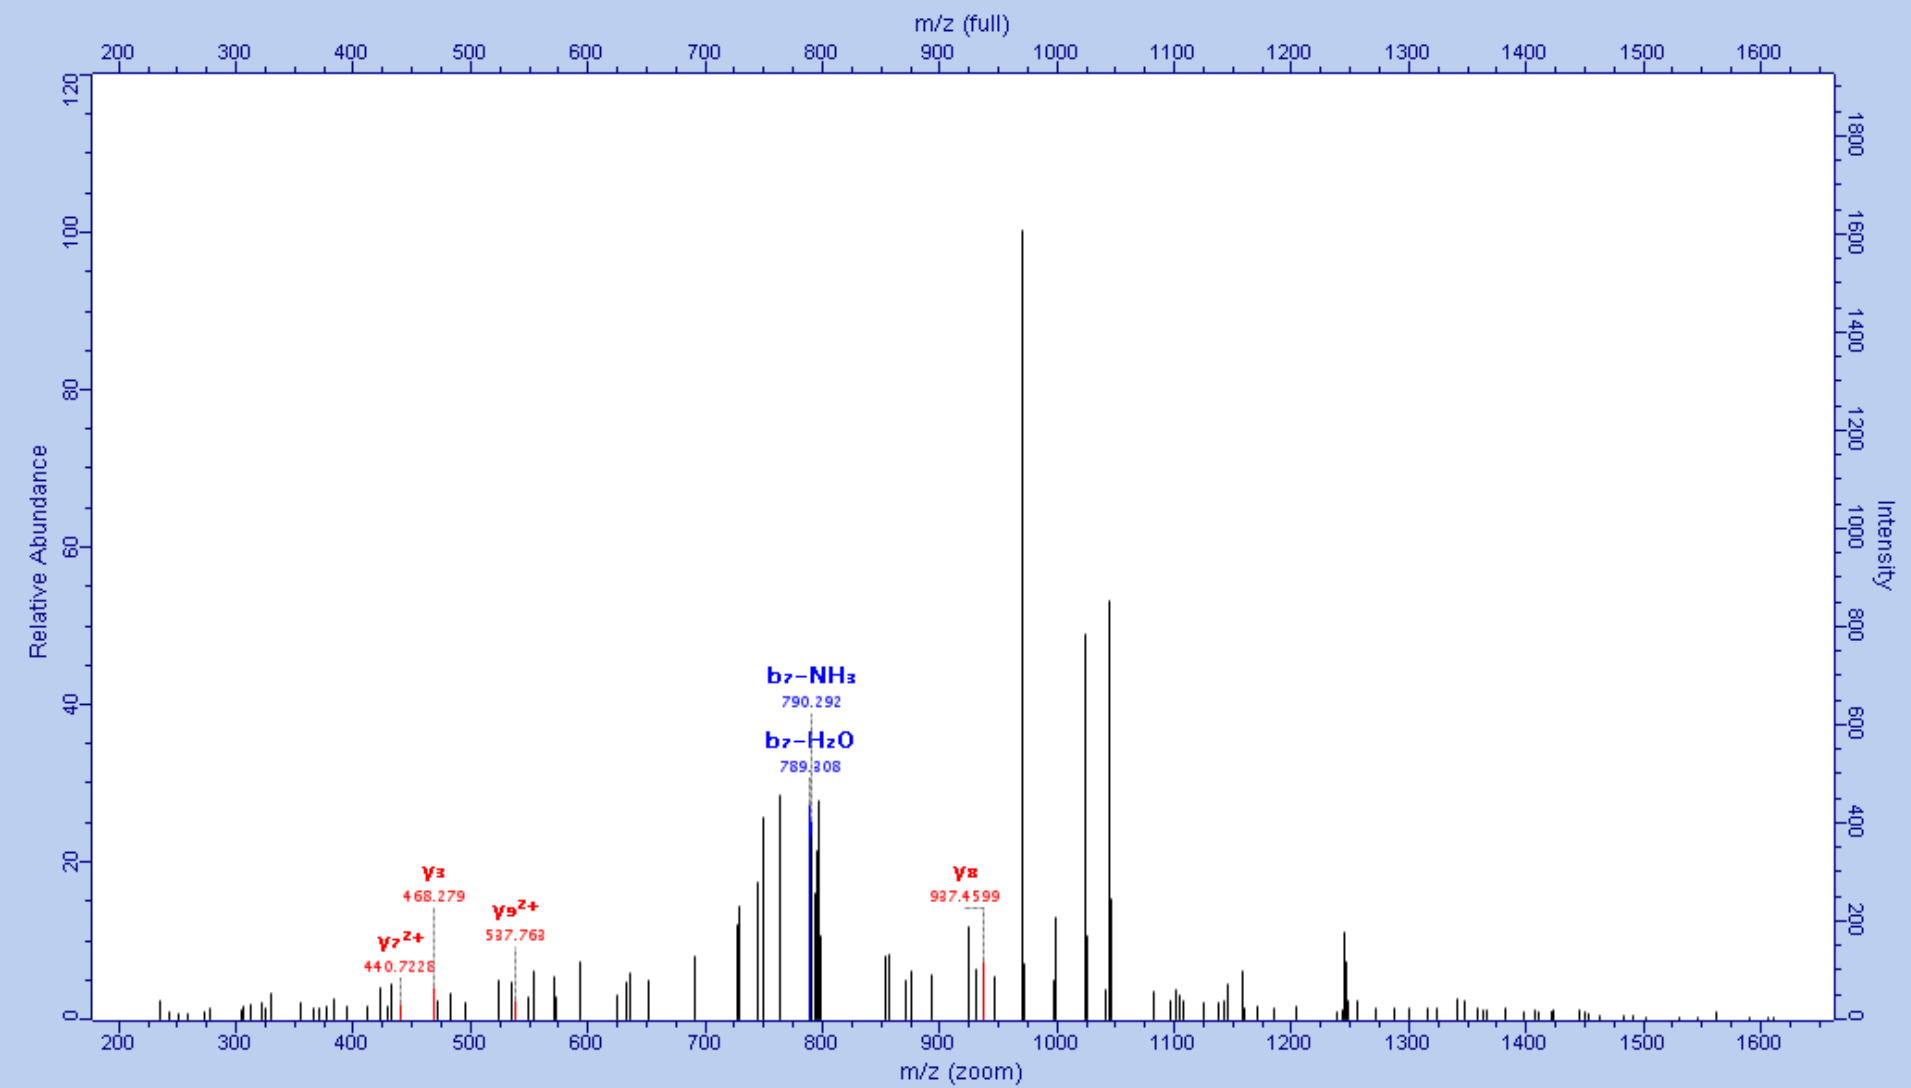

Protein: gil46199913  
Score: 0  
Source: AWAN-FT\_090928  
Scannumber: 4741  
Method: ITMS; CID: 1

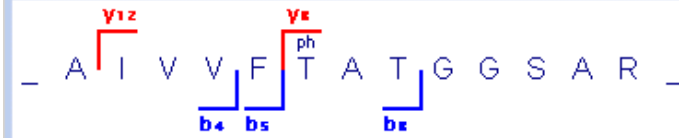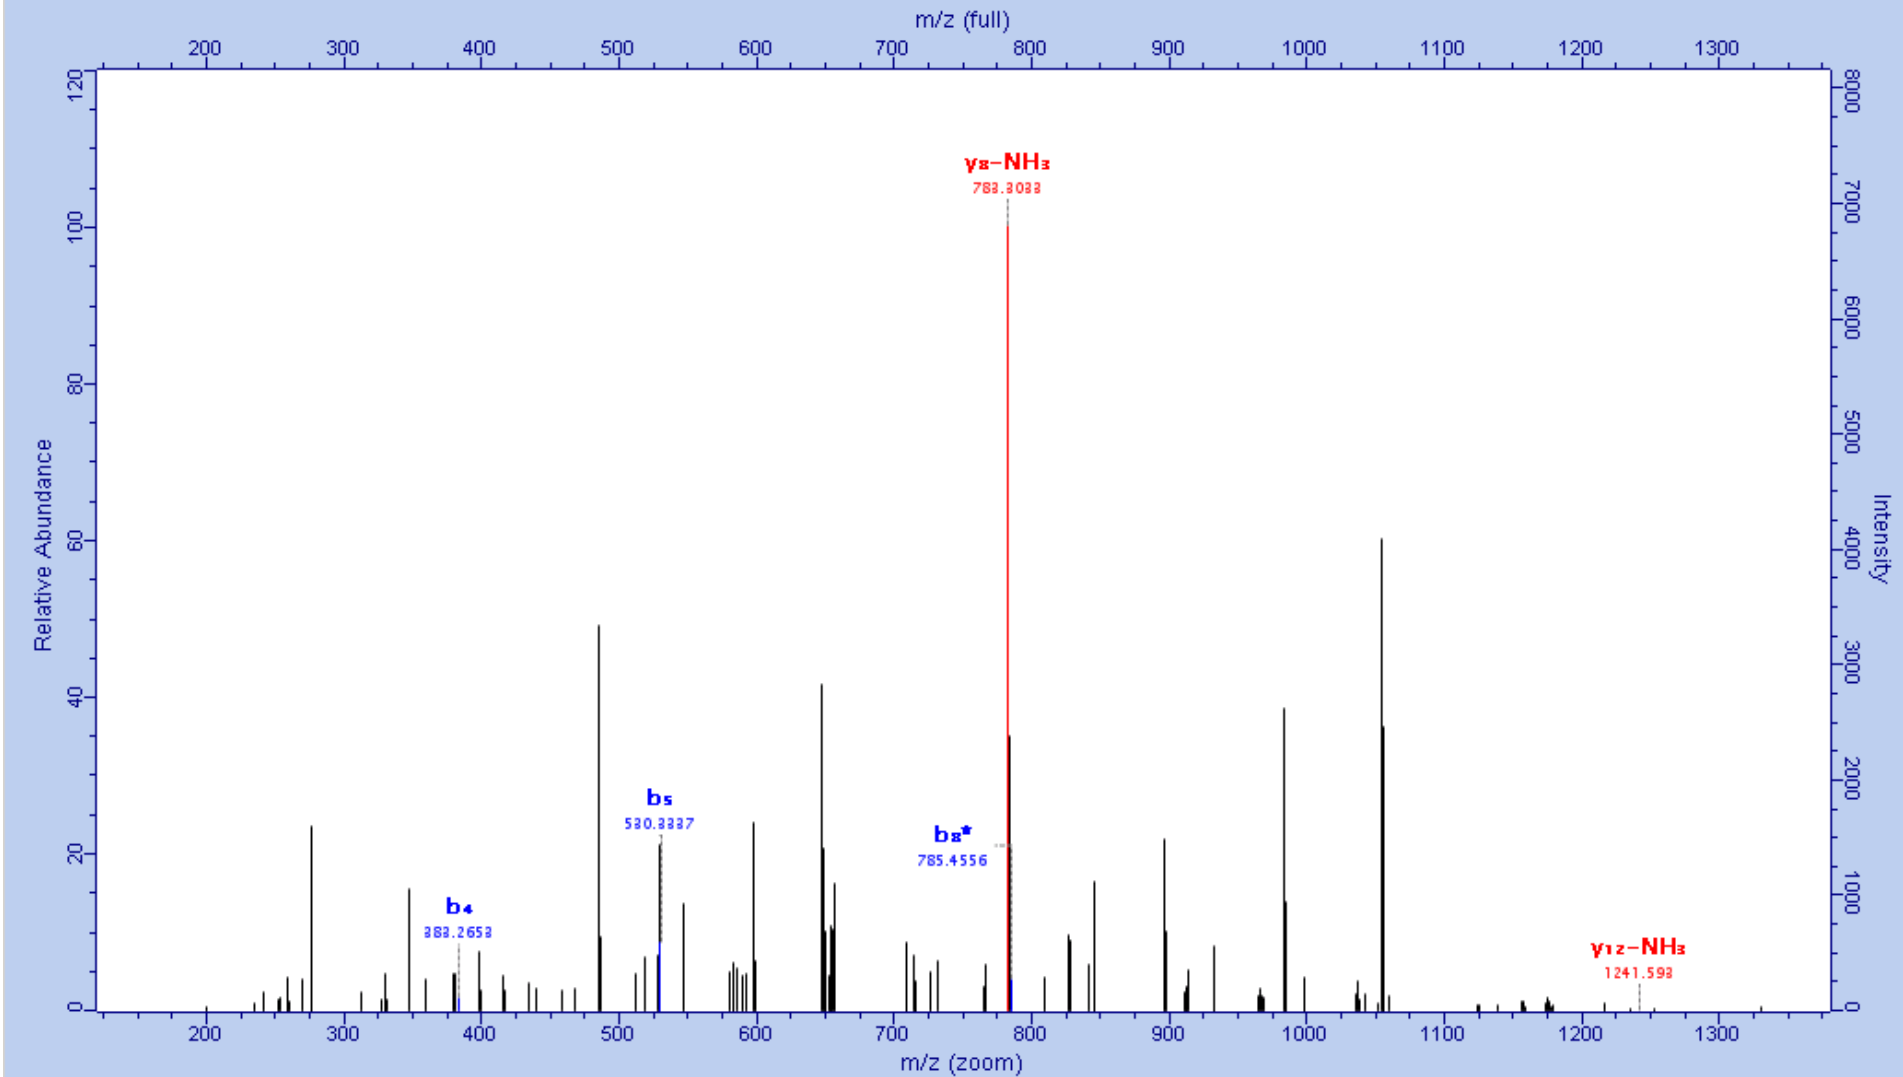

Protein: gjj46139913  
Score: 118.68  
Source: AWAN-FT\_090928  
Scannumber: 5559  
Method: ITMS; CID; 1

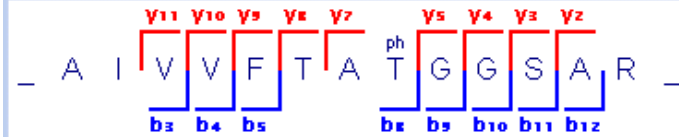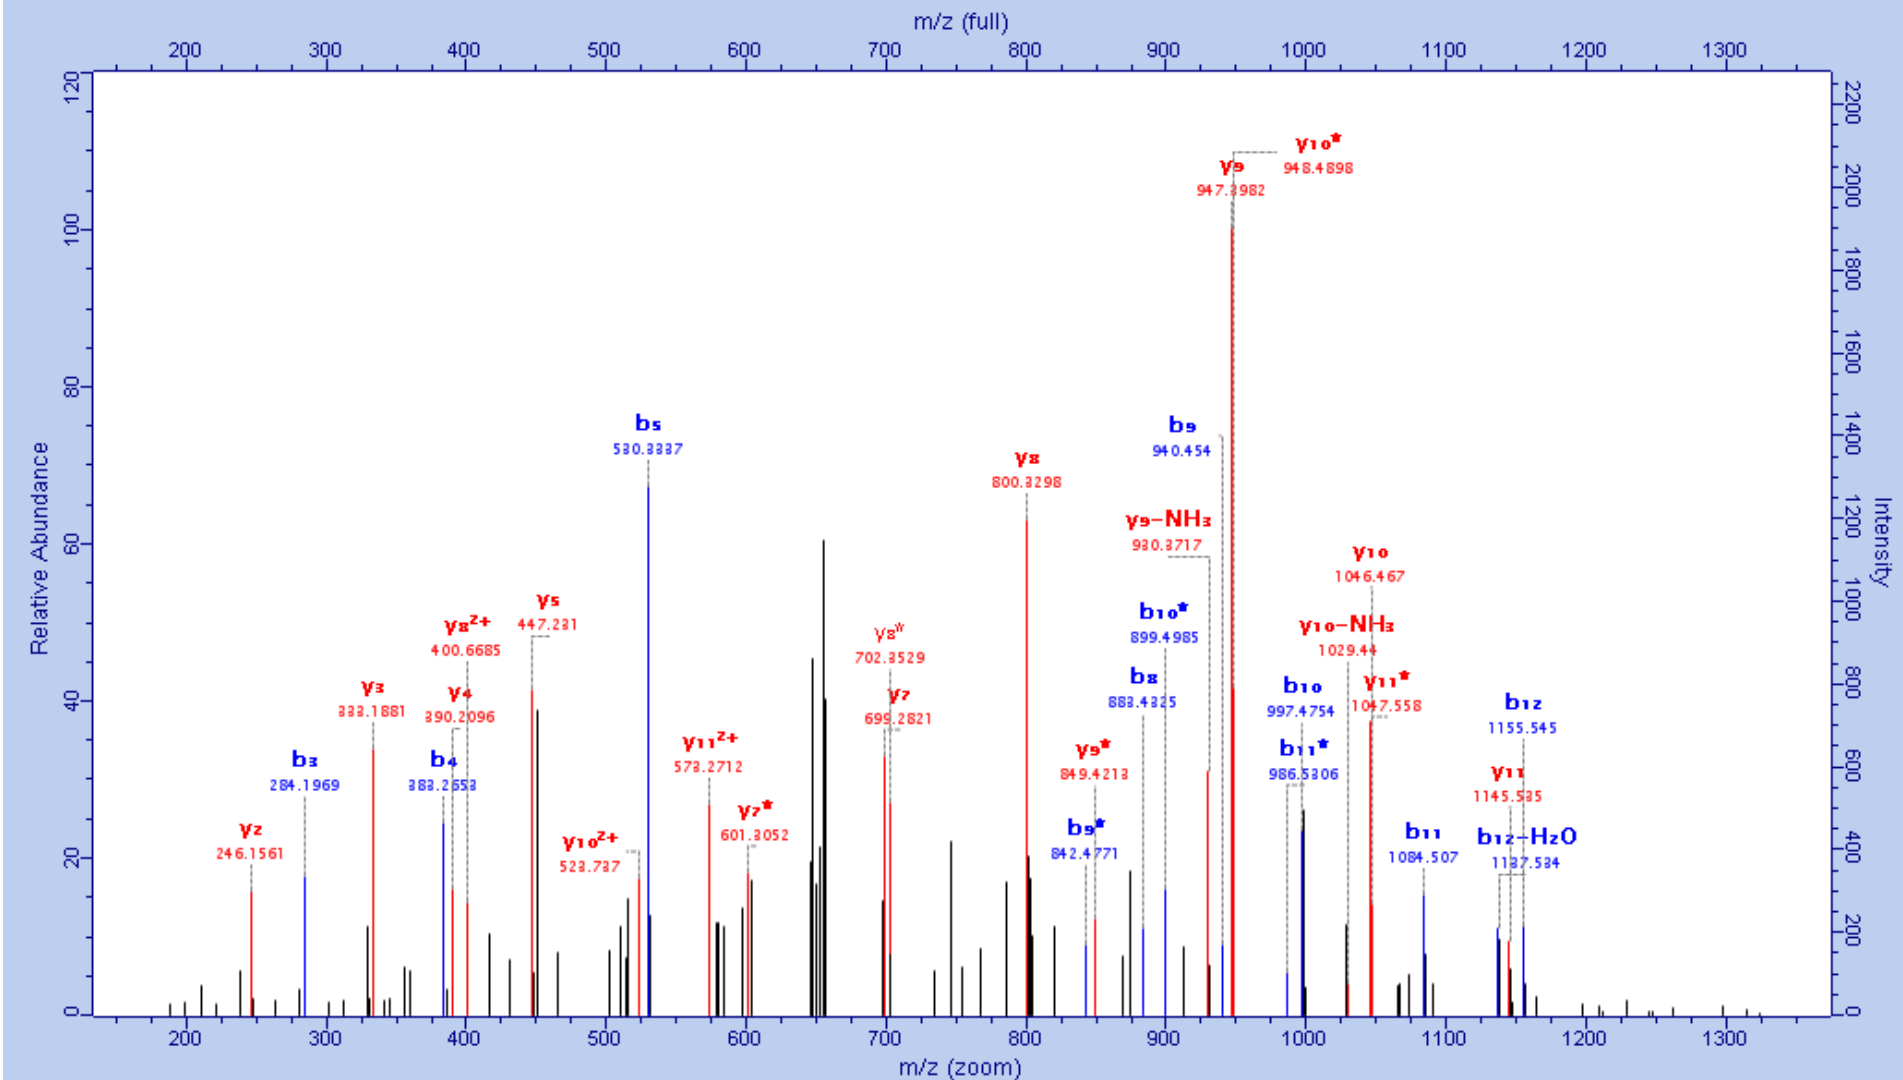

Protein: gi46199921  
 Score: 86.77  
 Source: AWAN-FT\_090928  
 Scannumber: 7449  
 Method: ITMS; CID; 1

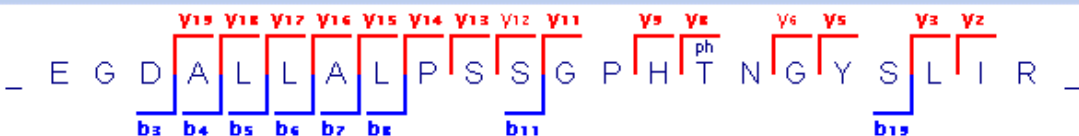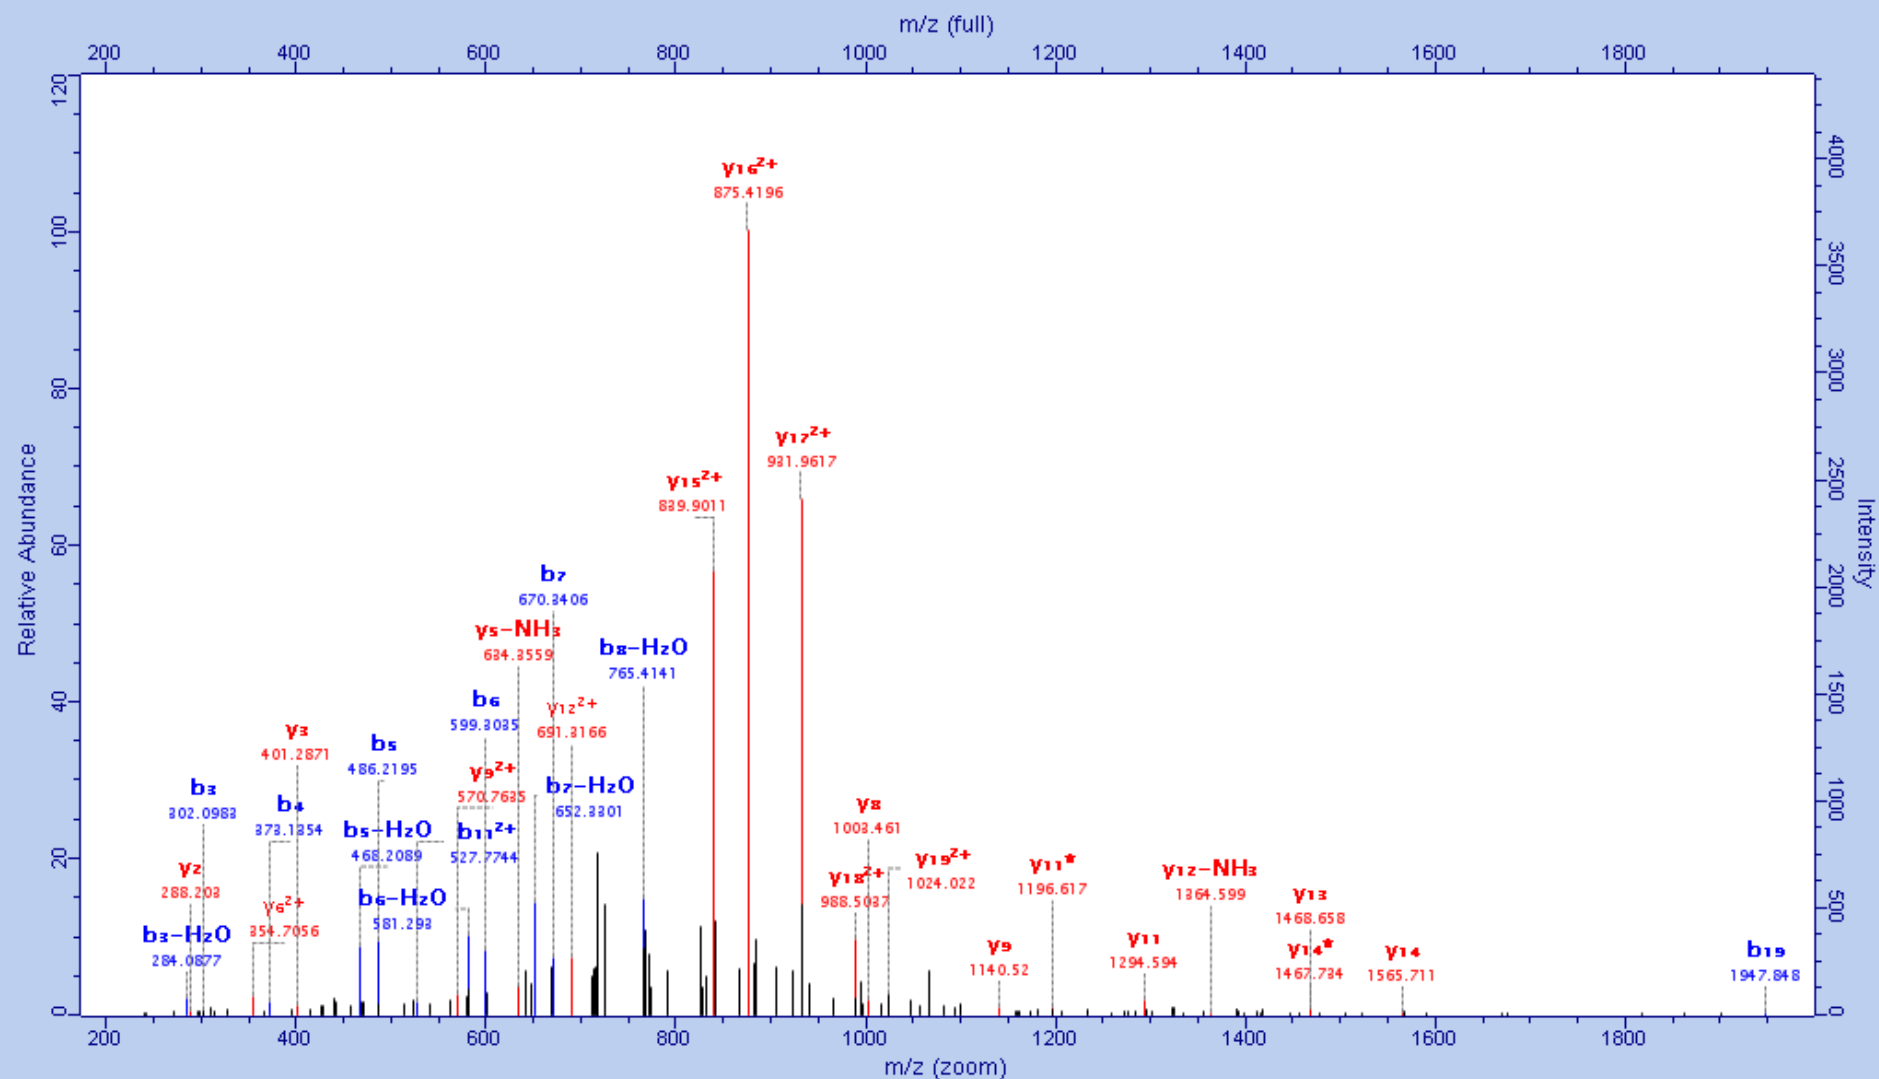

Protein: gil46199924  
Score: 33.99  
Source: service\_HB4  
Scannumber: 2708  
Method: ITMS; CID; 1

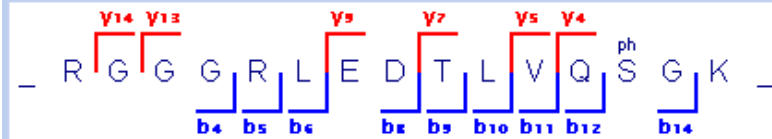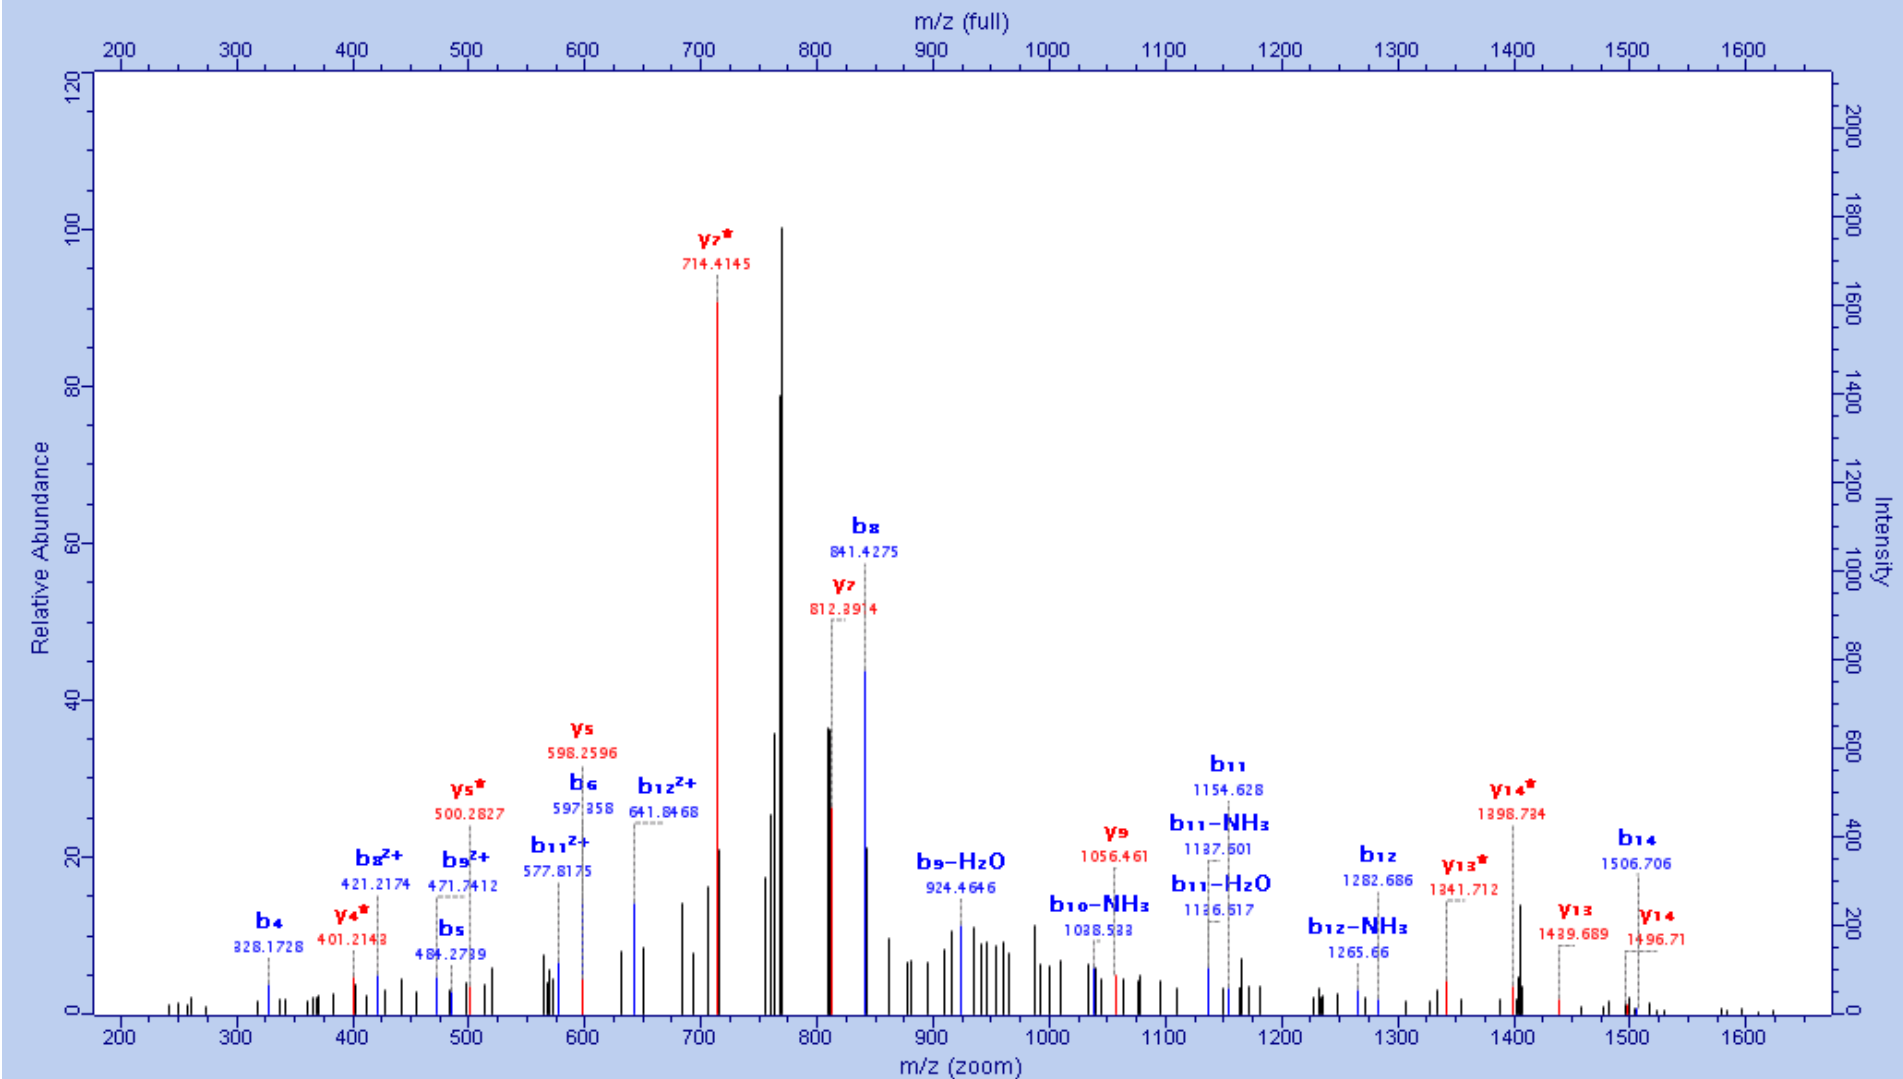



Protein: gil46199924  
Score: 38.78  
Source: service\_HB2  
Scannumber: 3118  
Method: ITMS; CID: 1

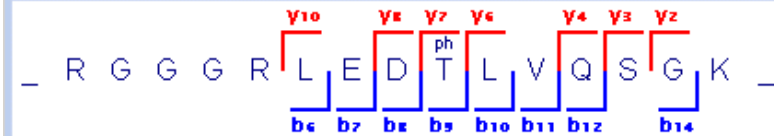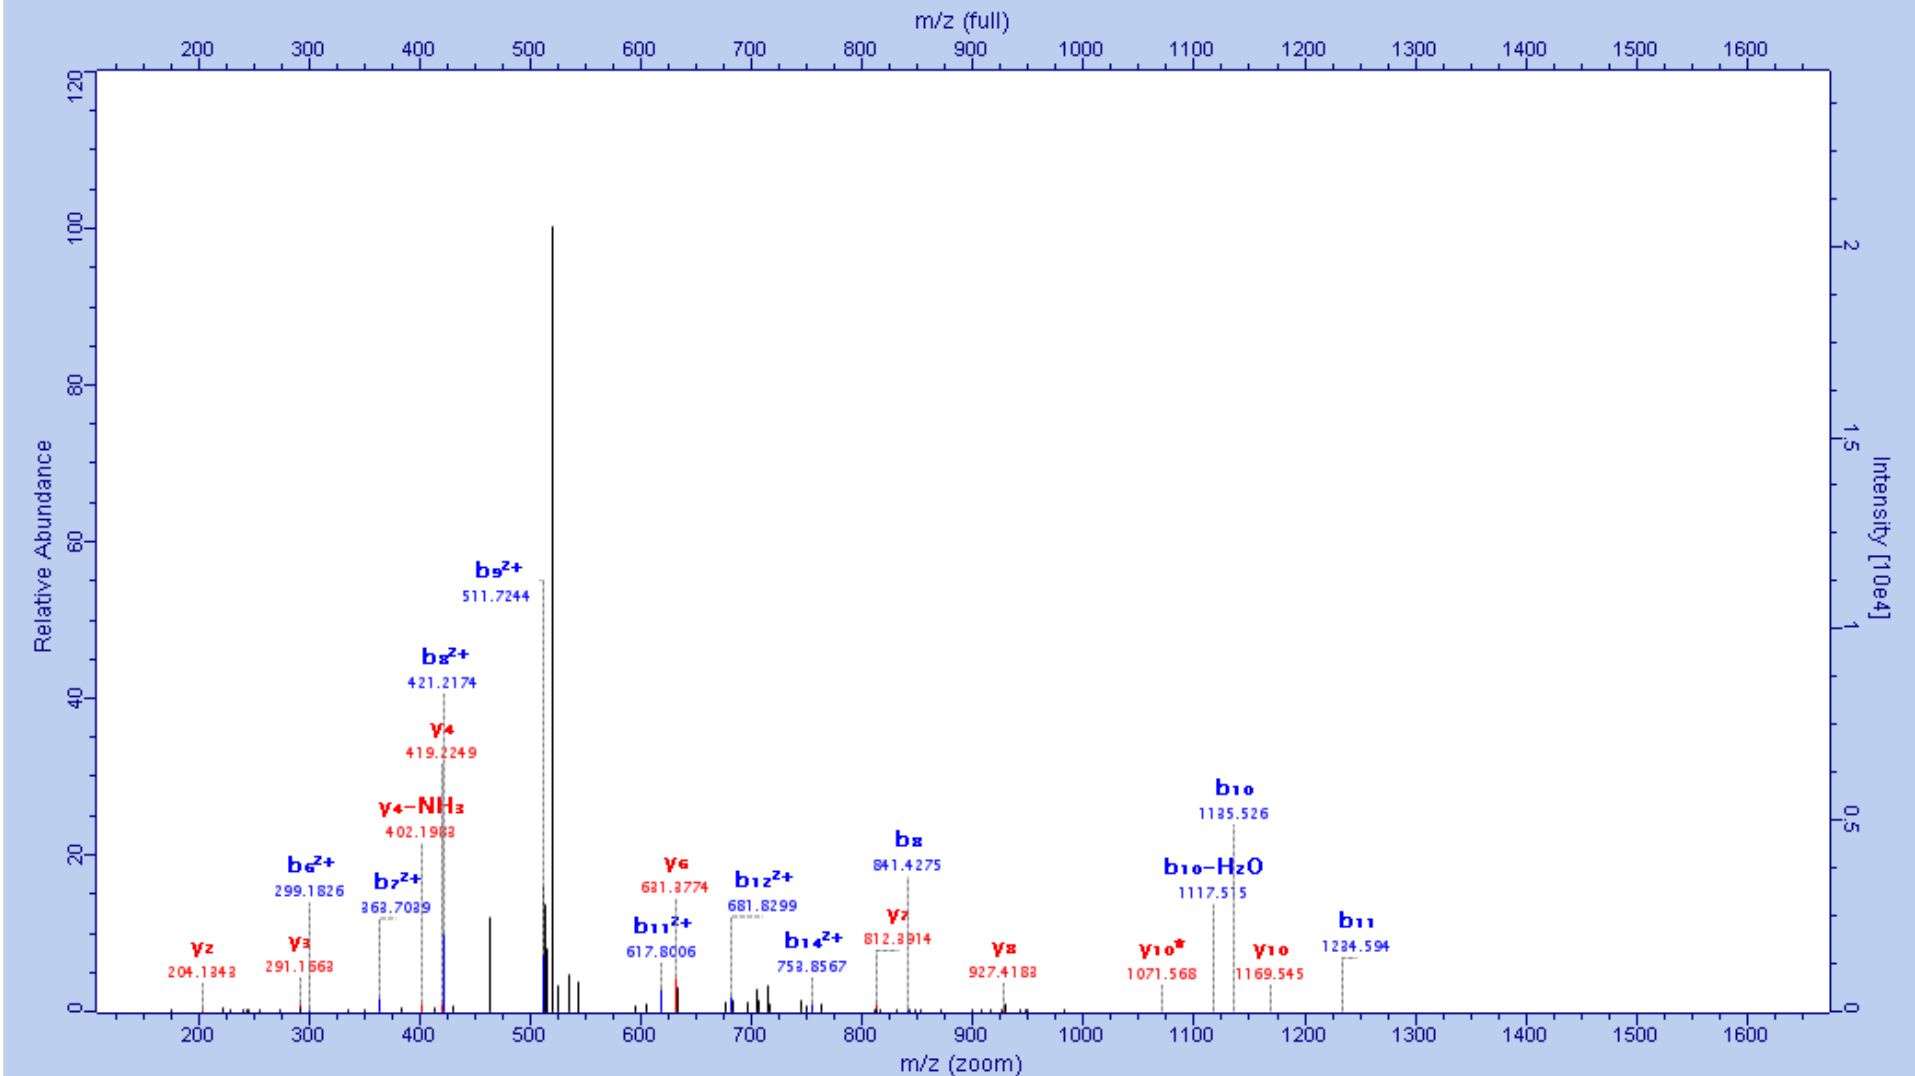

Protein: gil46199932  
 Score: 227.57  
 Source: AWAN-FT\_090928  
 Scannumber: 5375  
 Method: ITMS; CID: 1

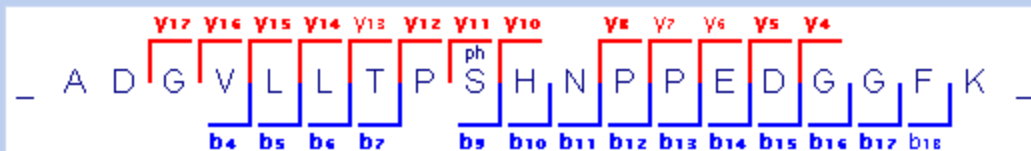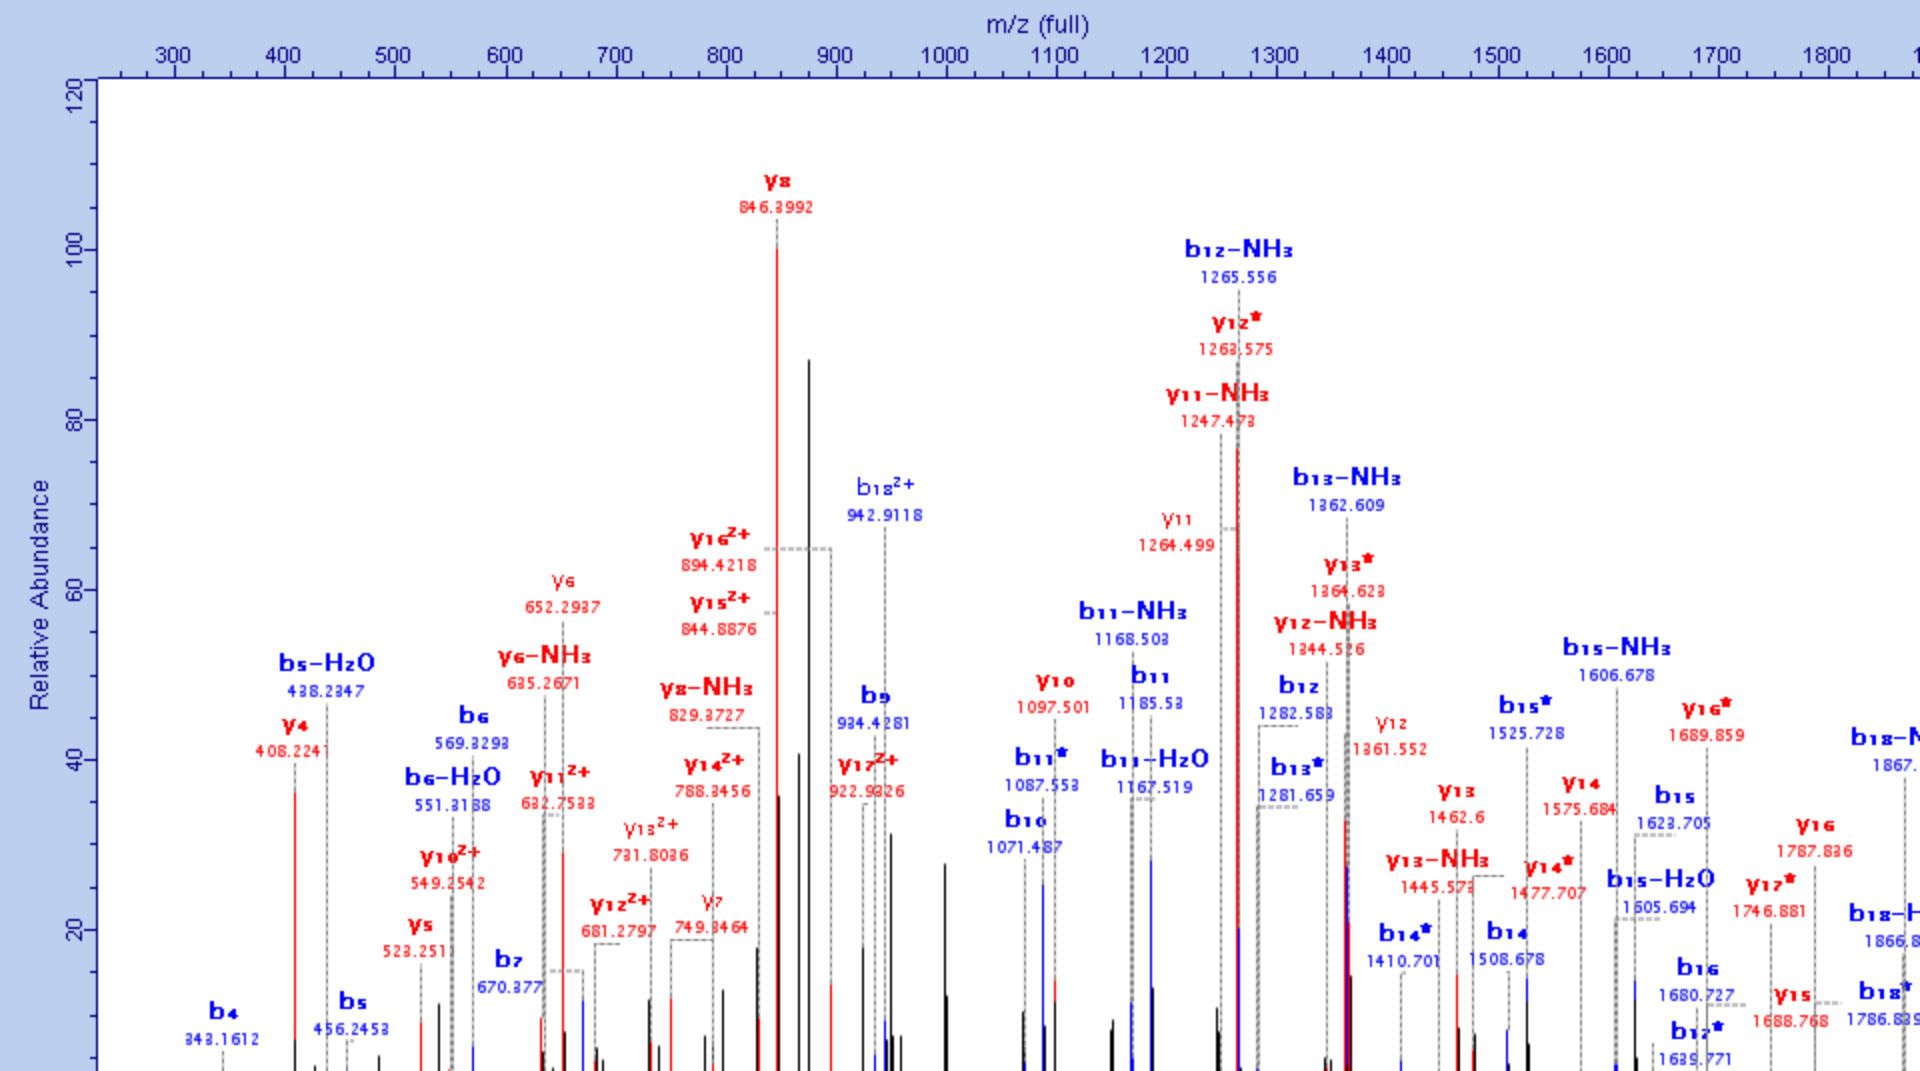

Protein: gil46139932  
 Score: 95.57  
 Source: service\_HB16  
 Scannumber: 3424  
 Method: ITMS; CID; 1

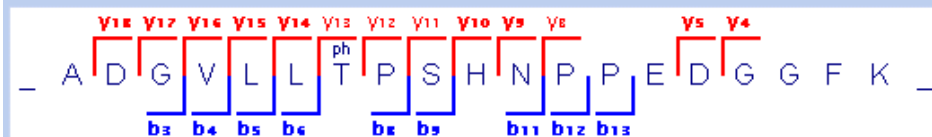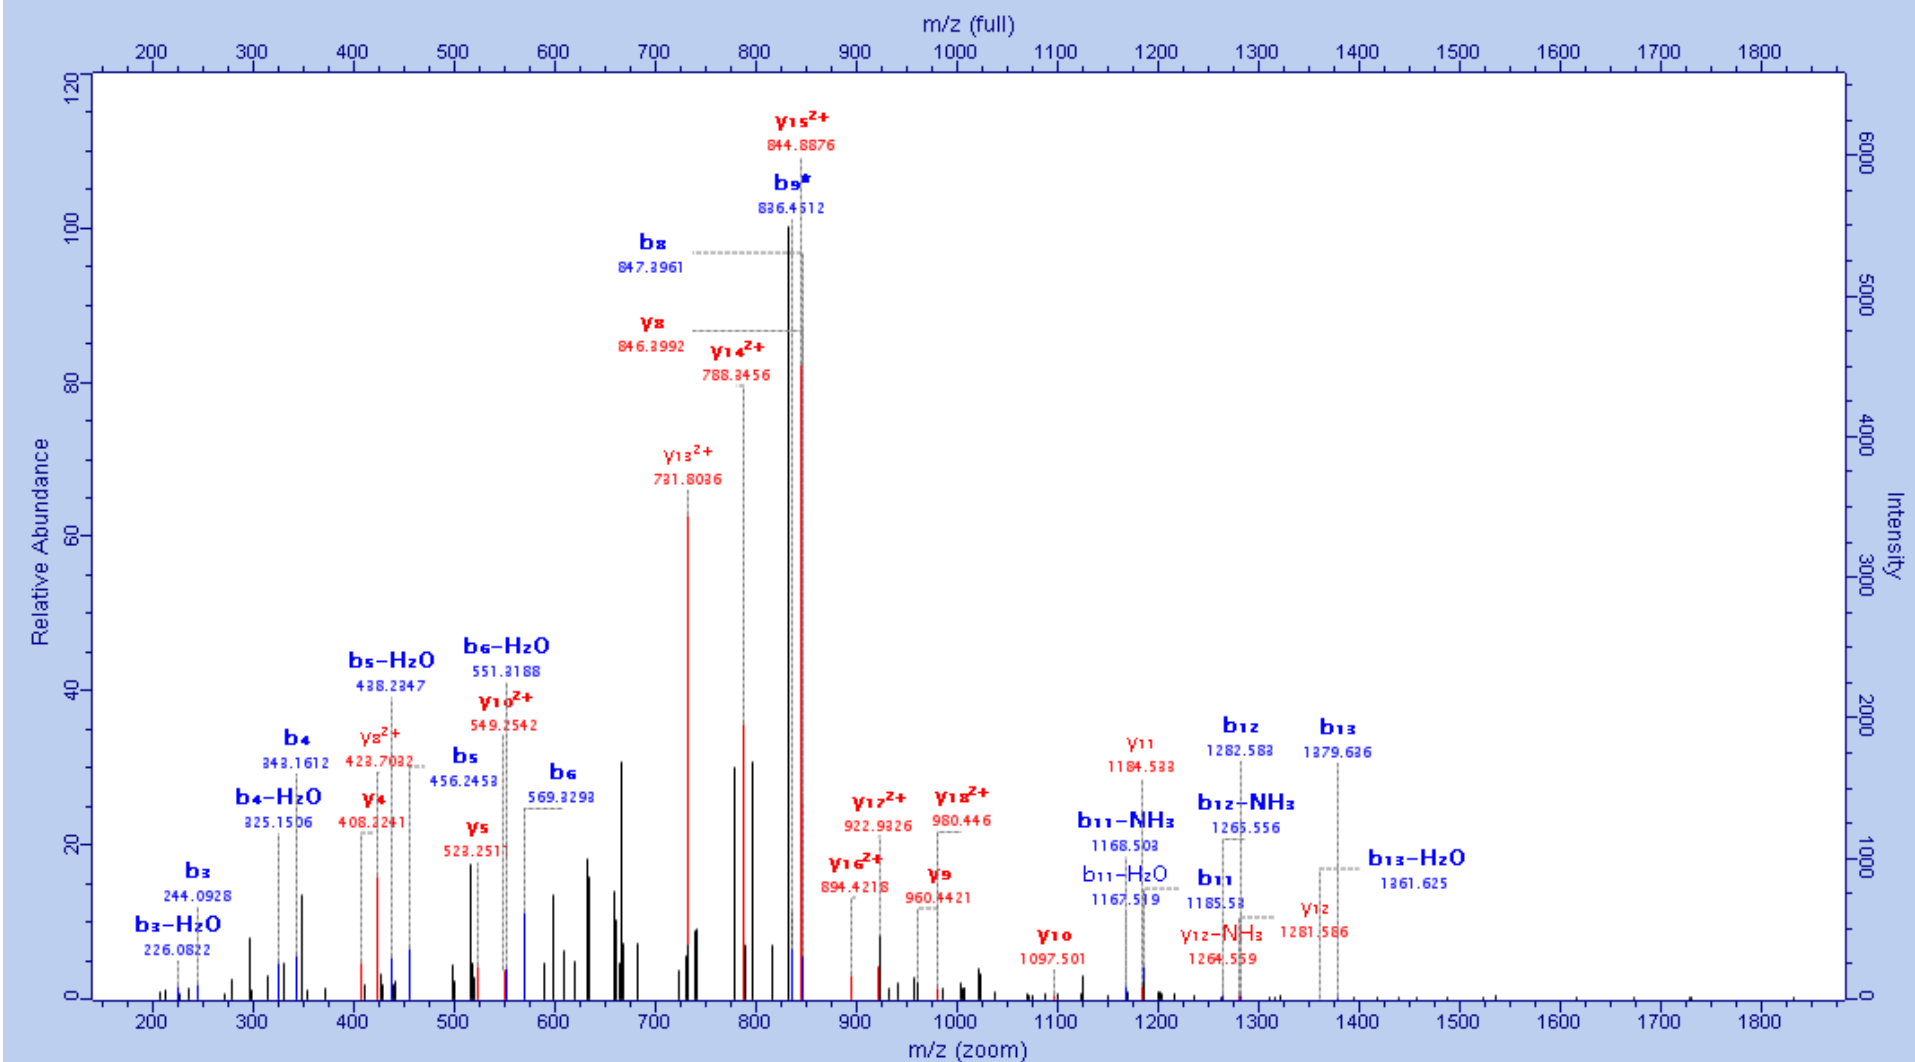

Protein: gil46193961  
 Score: 63.42  
 Source: service\_HB1\_090716155901  
 Scannumber: 4949  
 Method: ITMS; CID; 1

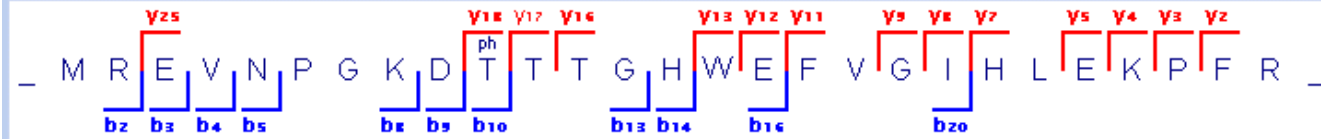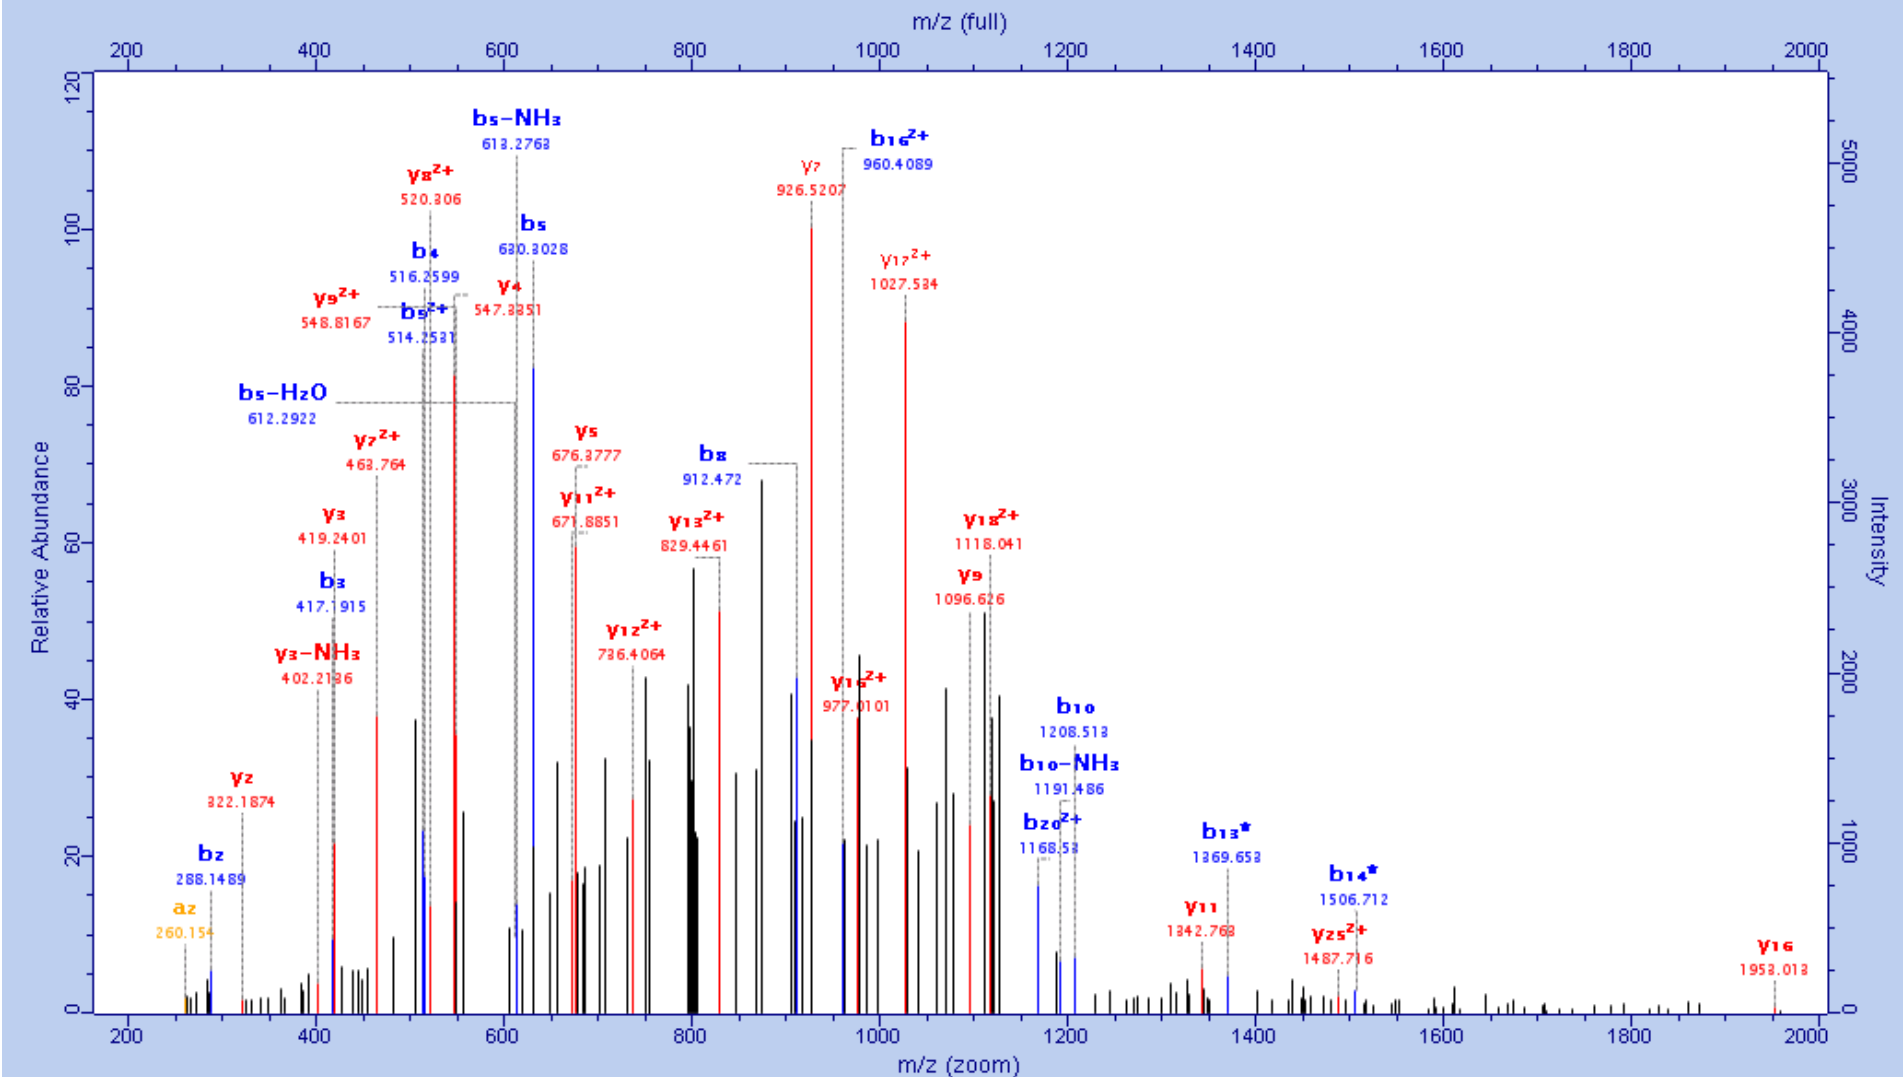

Protein: gil46199961  
 Score: 16.33  
 Source: service\_HB2\_090716173725  
 Scannumber: 4385  
 Method: ITMS; CID; 1

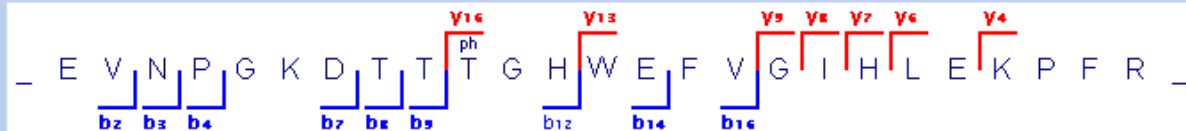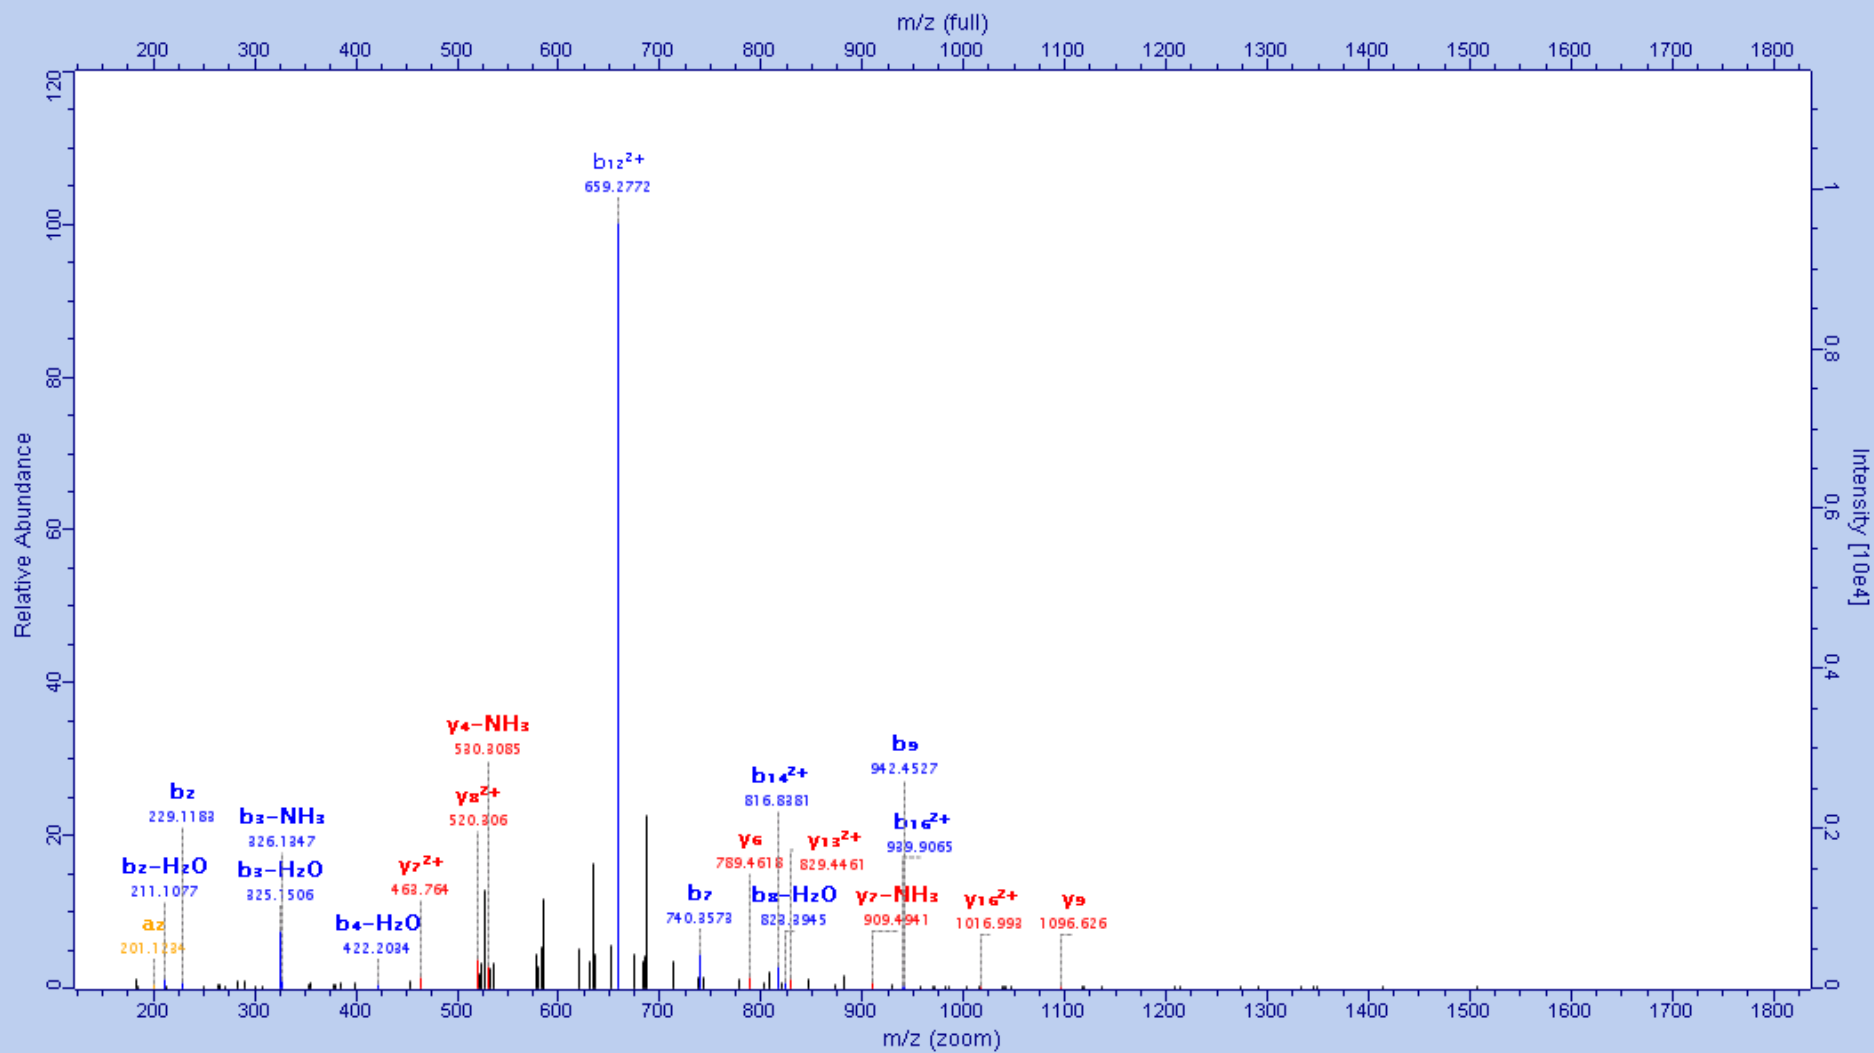

Protein: gil46200011  
 Score: 37.68  
 Source: AWAN-19-21\_090928  
 Scannumber: 8003  
 Method: ITMS; CID; 1

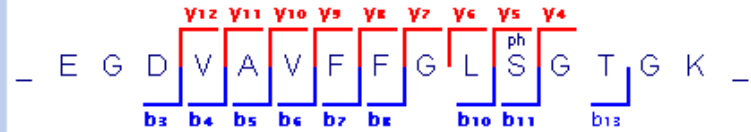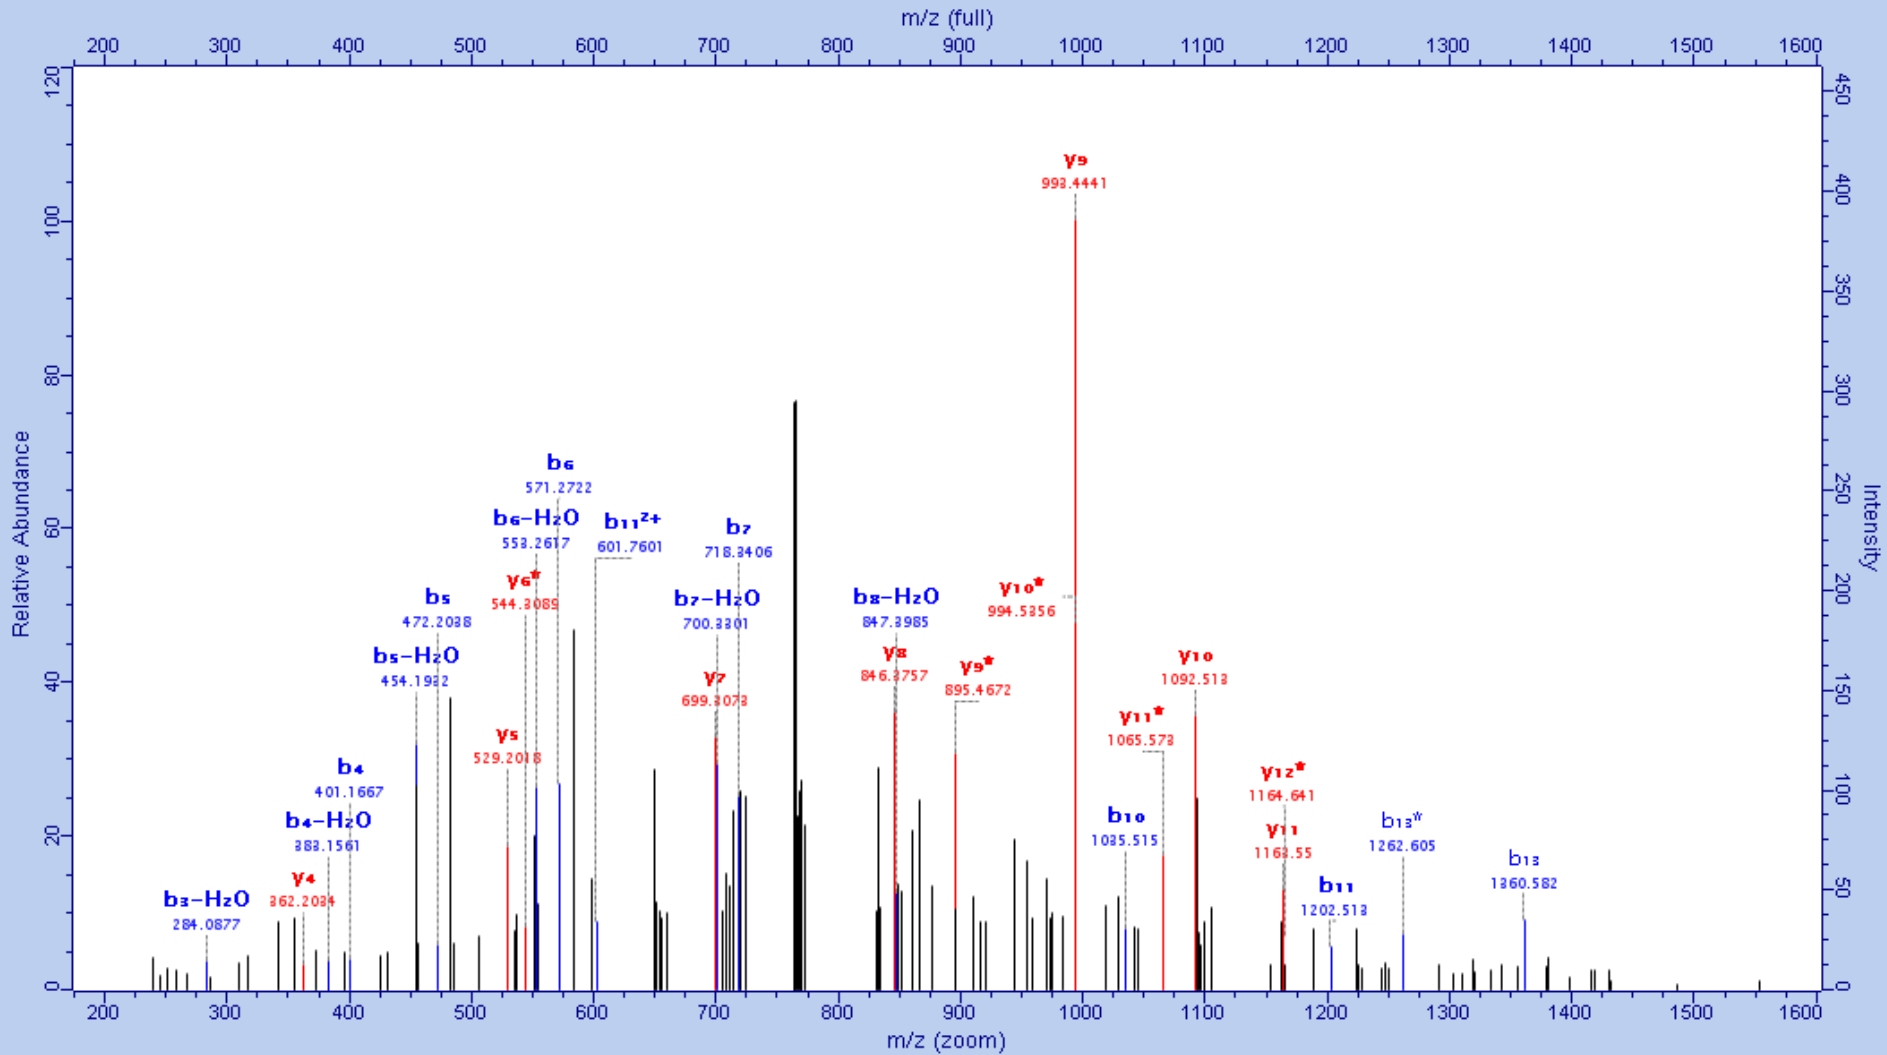

Protein: gil46200016  
Score: 70.51  
Source: AWAN-FT\_090928  
Scannumber: 5561  
Method: ITMS; CID; 1

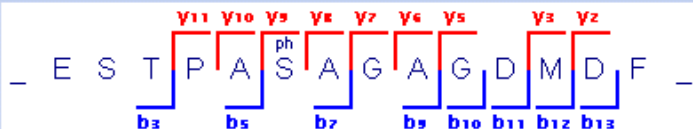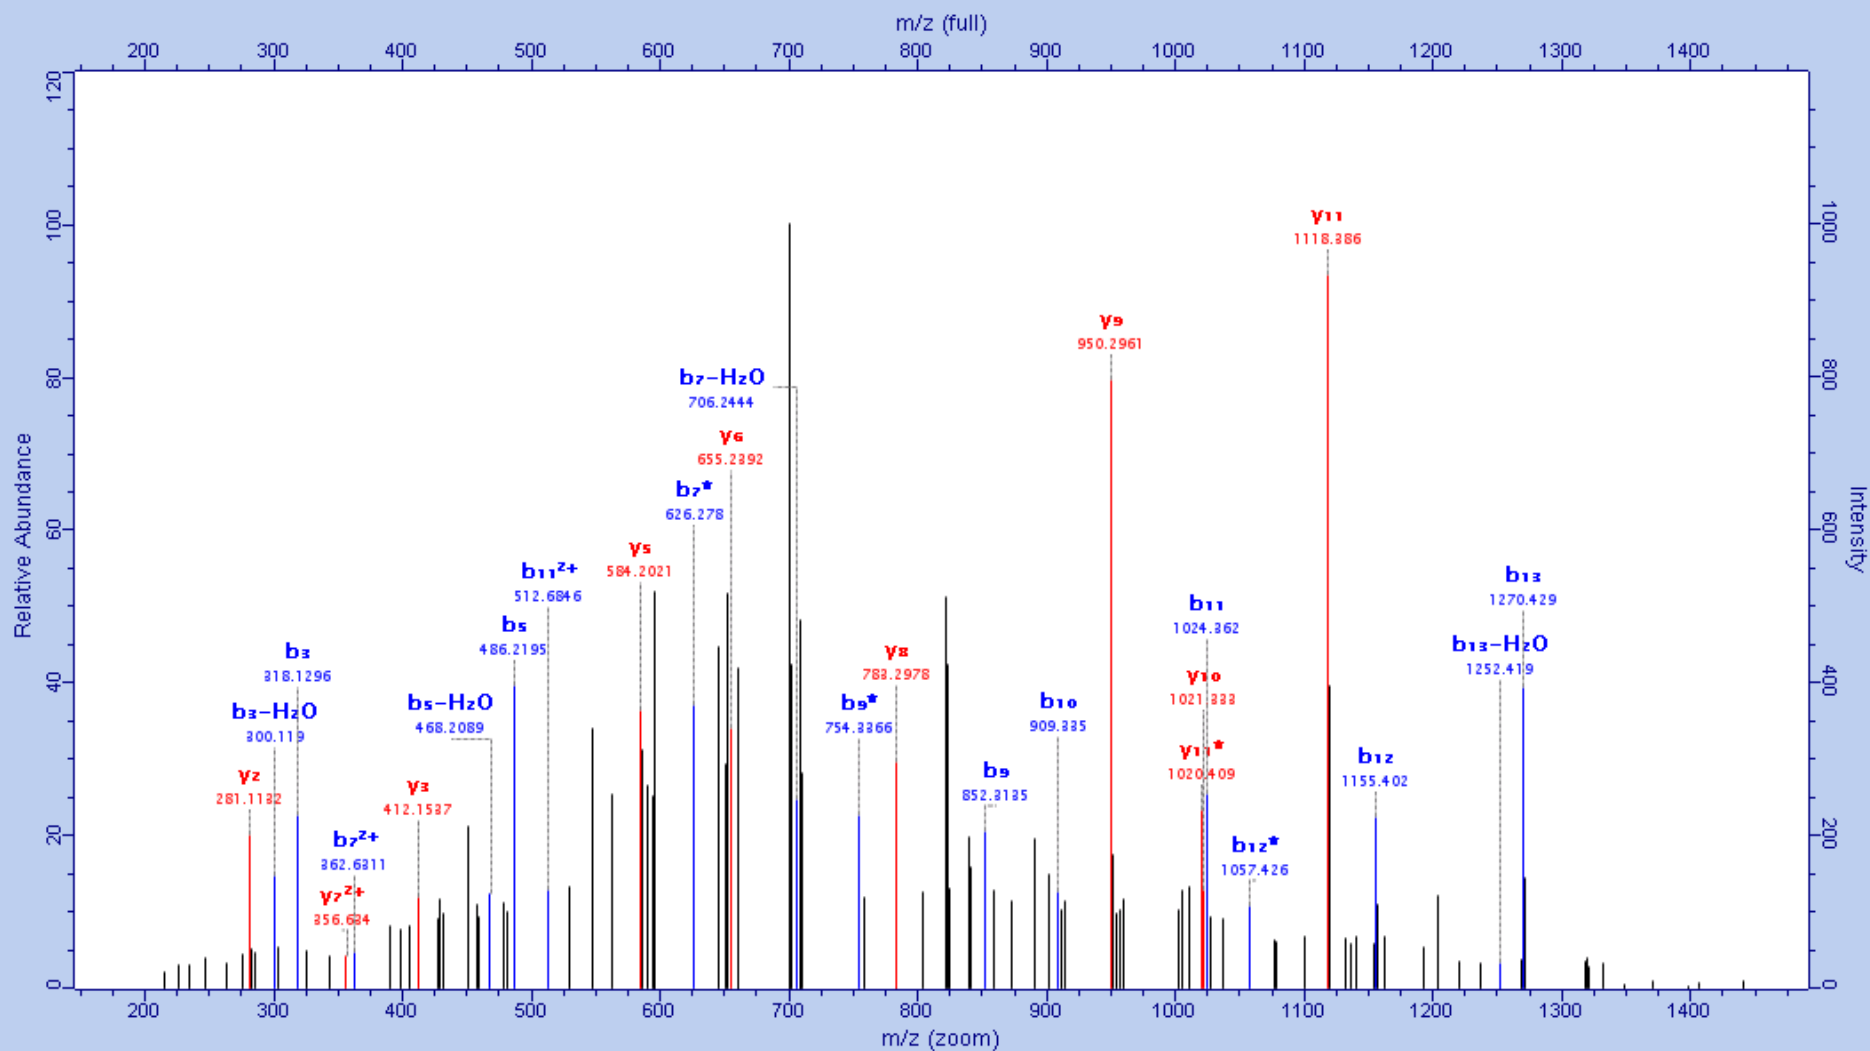

Protein: gil46200074  
Score: 98.07  
Source: service\_HB16  
Scannumber: 6888  
Method: ITMS; CID: 1

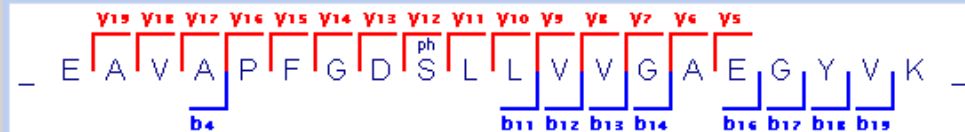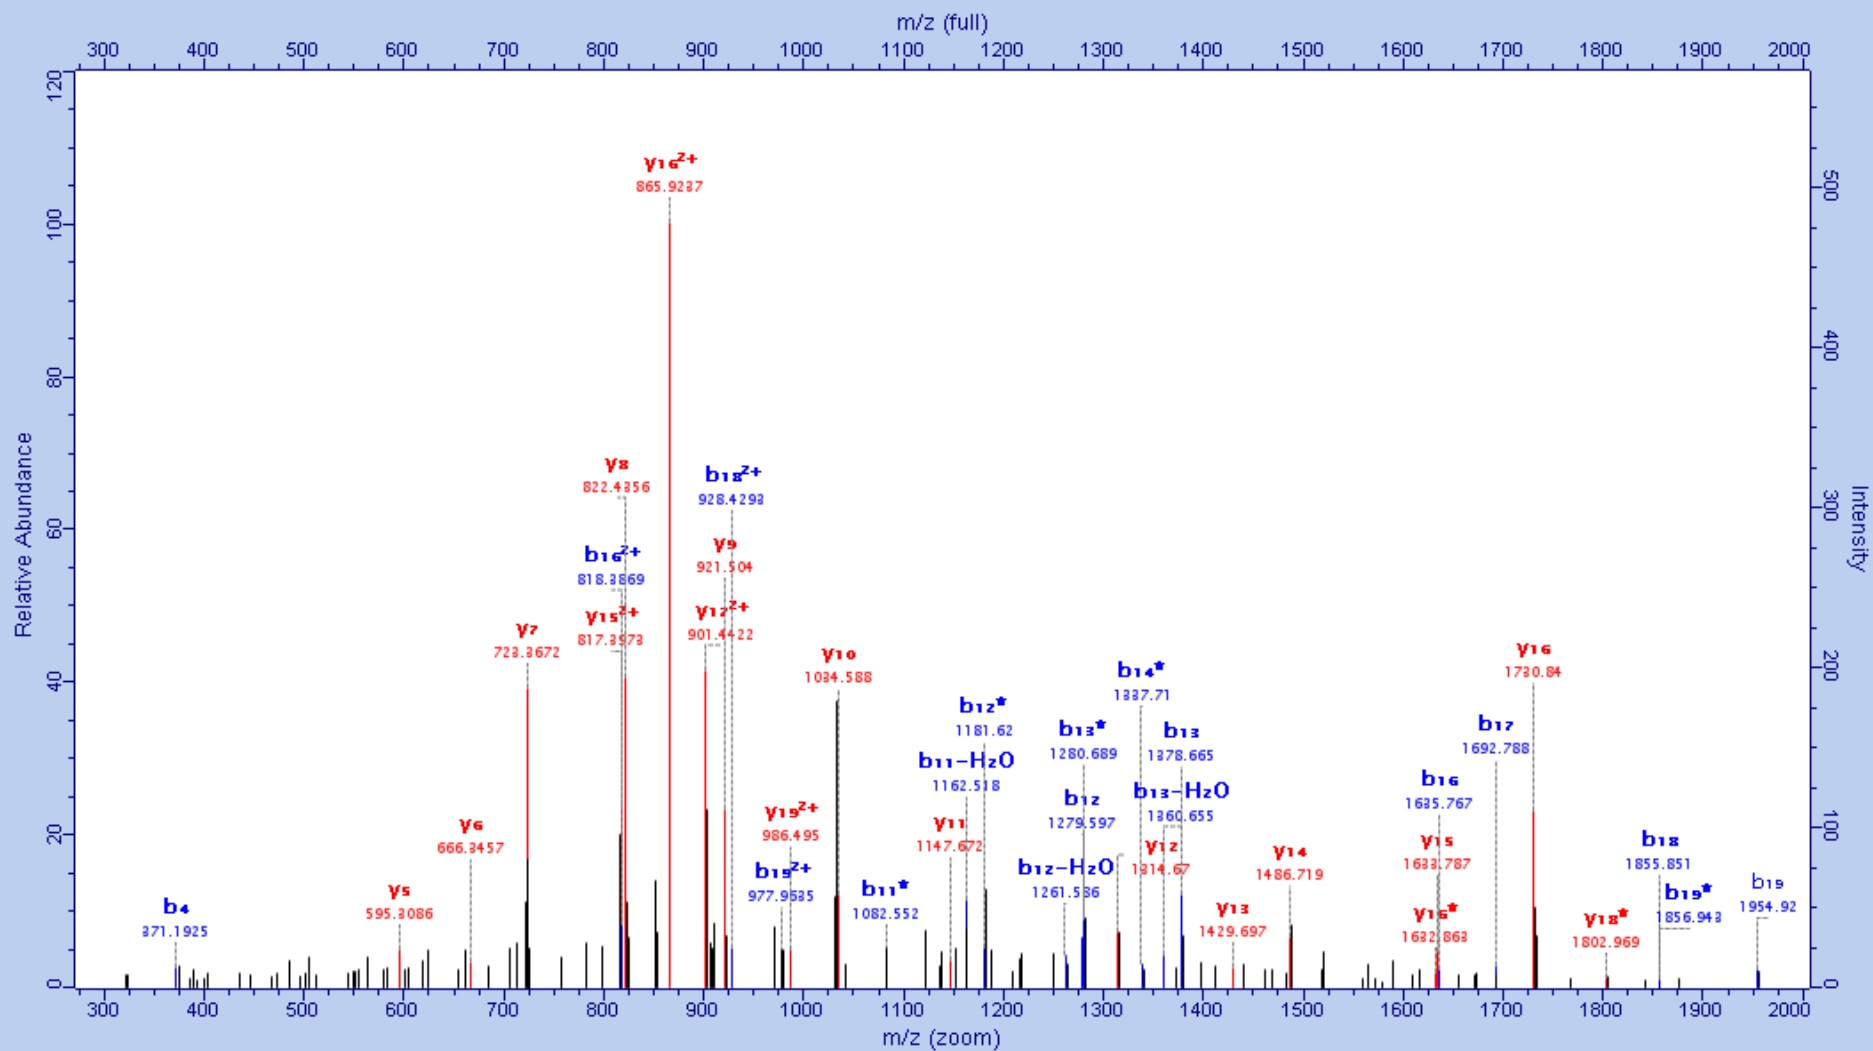



Protein: gil46200078  
 Score: 229.11  
 Source: AWAN-FT\_090928  
 Scannumber: 6100  
 Method: ITMS; CID; 1

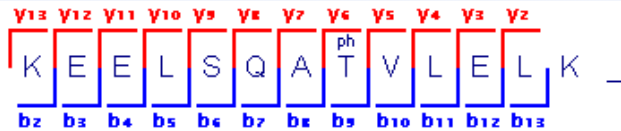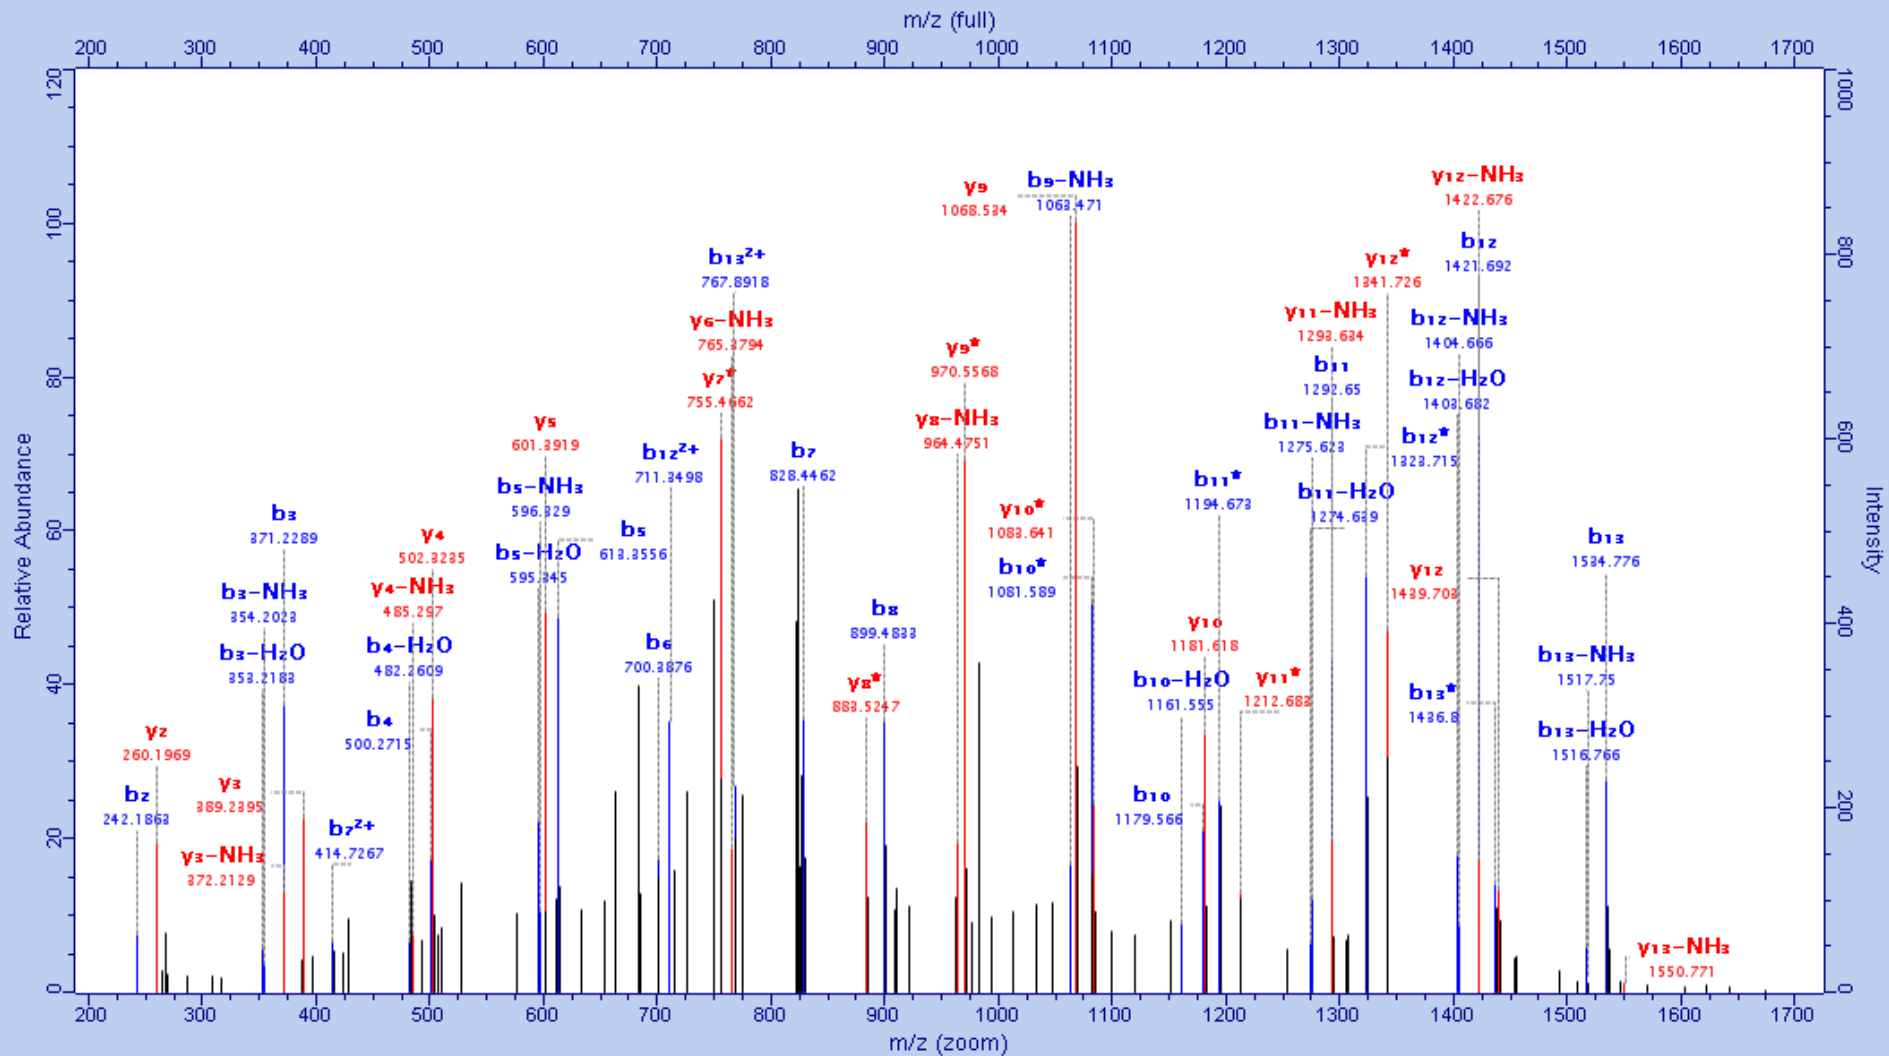

Protein: gil46200100  
Score: 25.51  
Source: service\_9\_090617111648  
Scannumber: 3112  
Method: ITMS; CID; 1

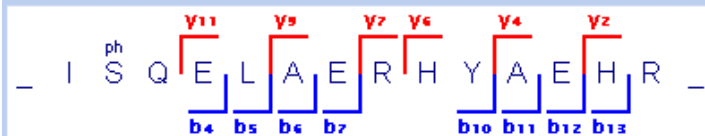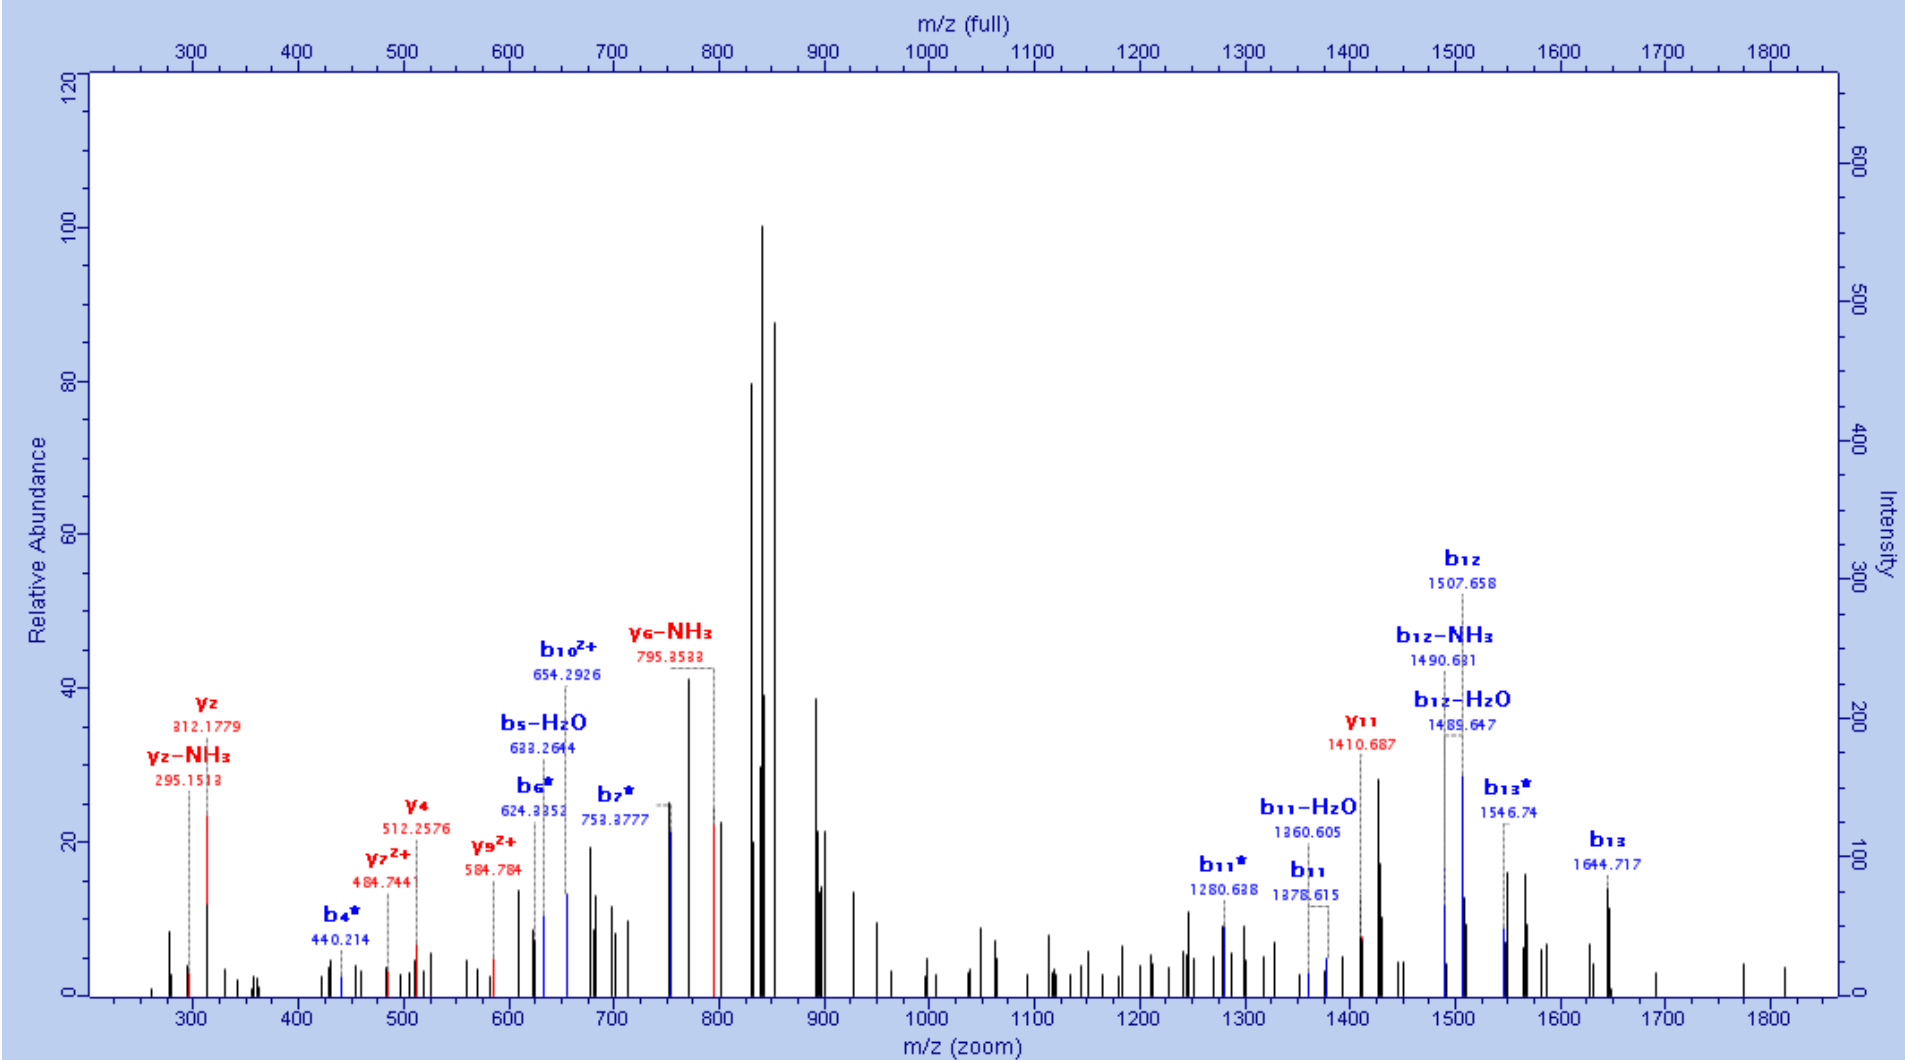

Protein: gil46200100  
 Score: 139.94  
 Source: service\_HB5  
 Scannumber: 1659  
 Method: ITMS; CID; 1

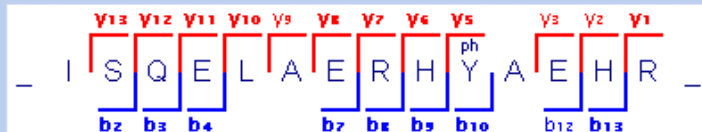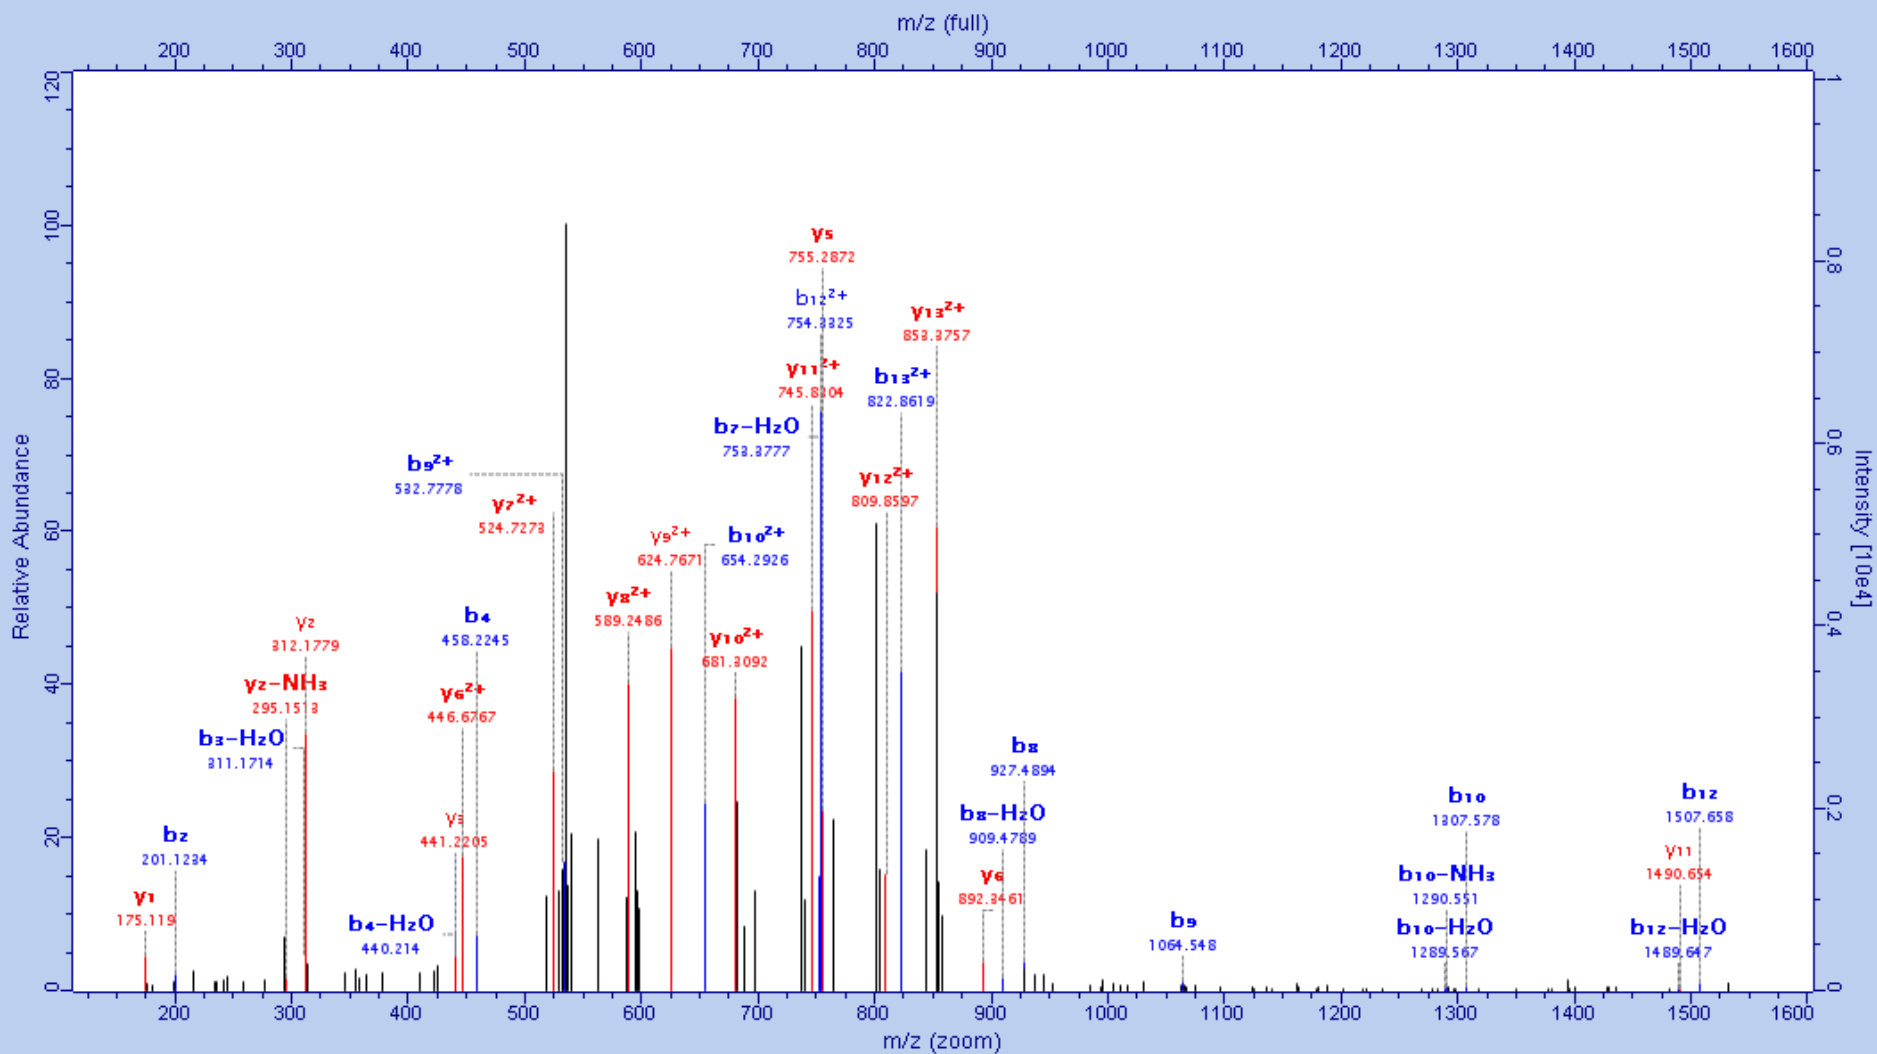

Protein: gil462001.29  
Score: 24.59  
Source: service\_HB13  
Scannumber: 2685  
Method: ITMS; CID: 1

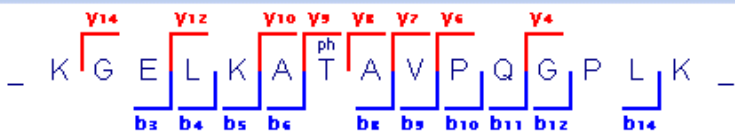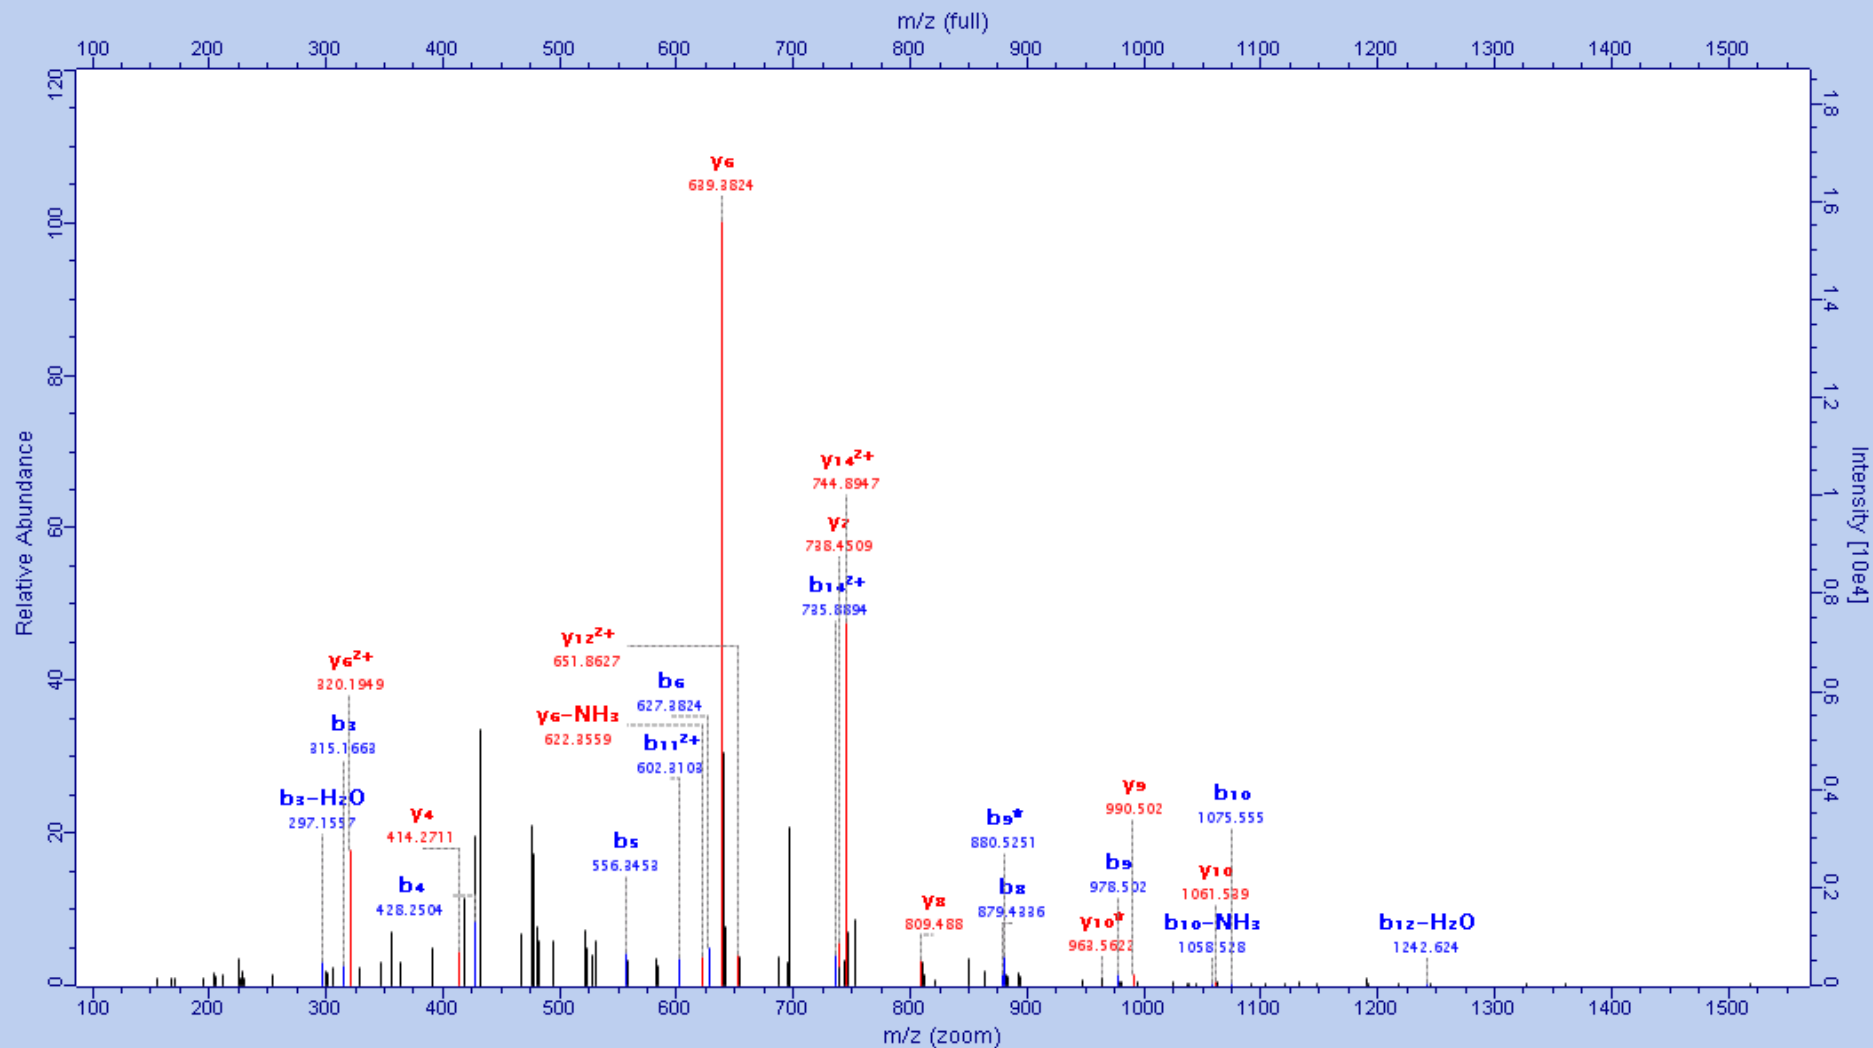

Protein: gil46200154  
Score: 22.5  
Source: service\_HB15  
Scannumber: 3315  
Method: ITMS; CID; 1

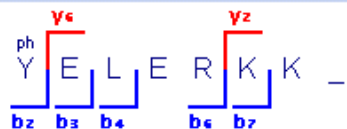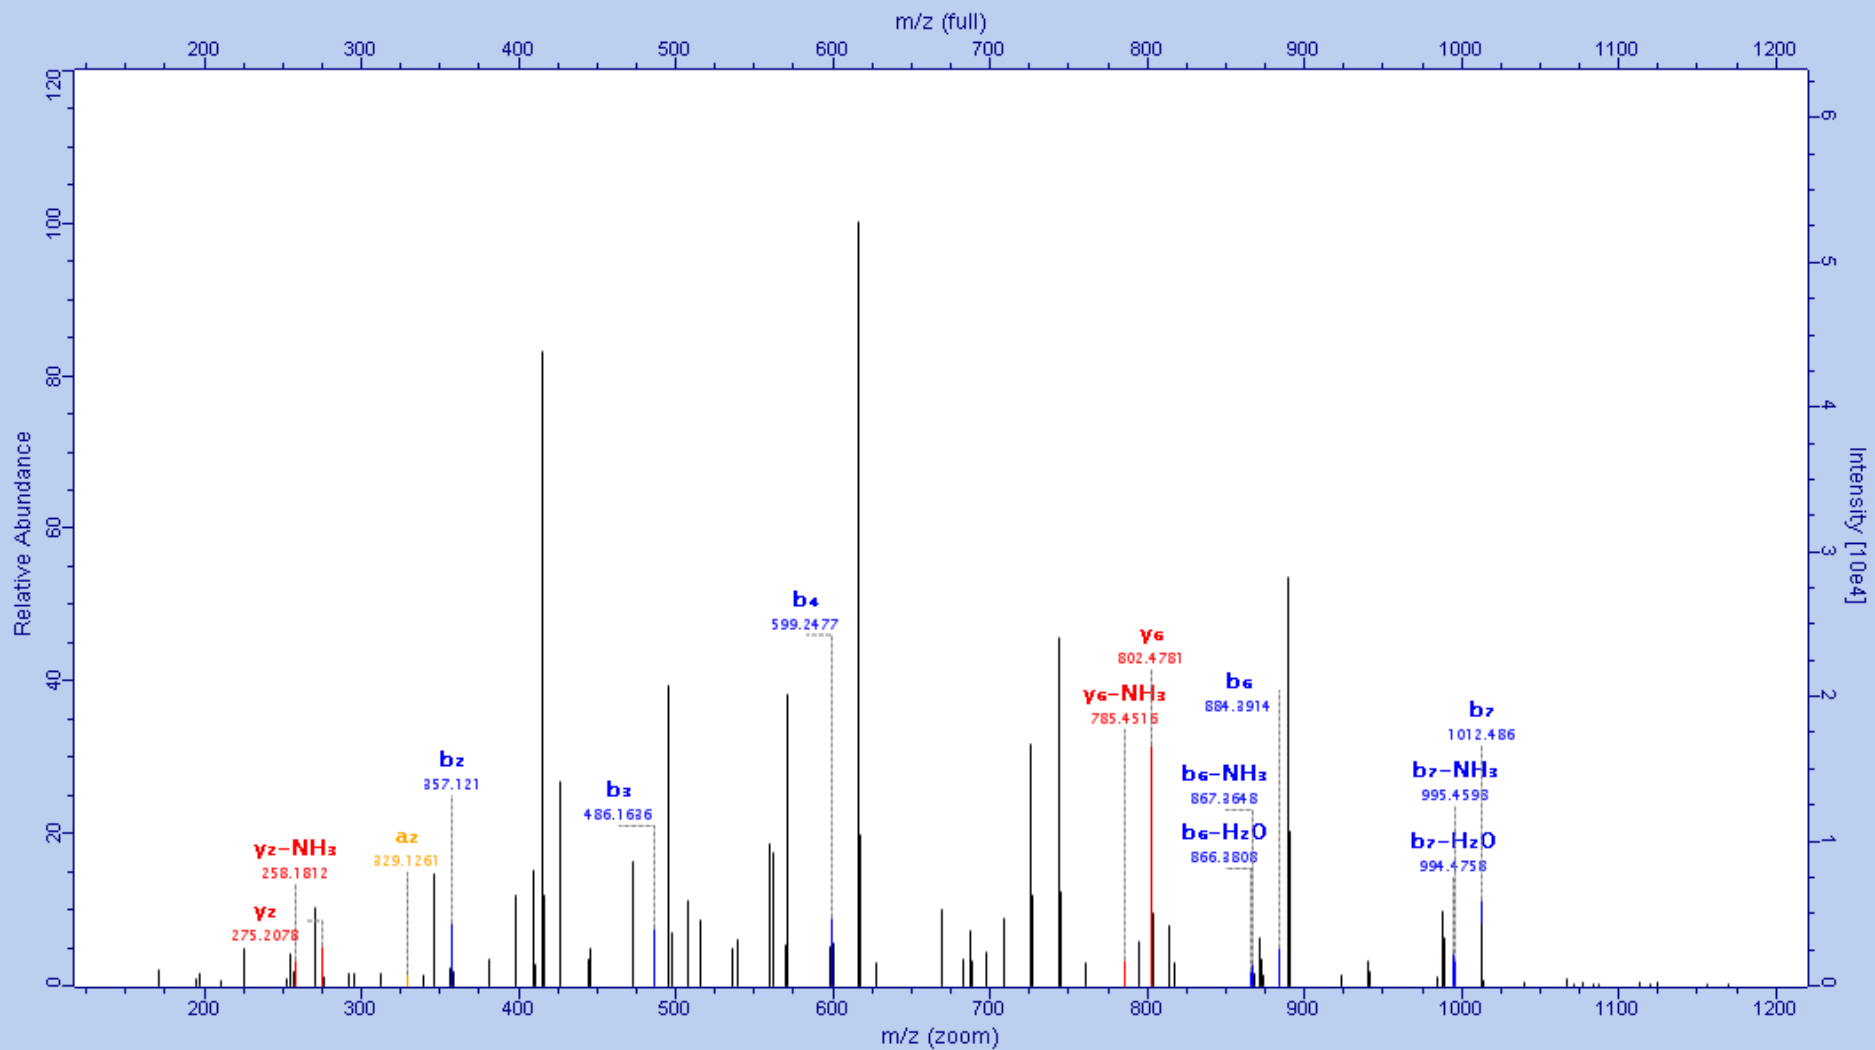

Protein: gil46200157  
Score: 135.96  
Source: AWAN-FT\_090928  
Scannumber: 3056  
Method: ITMS; CID; 1

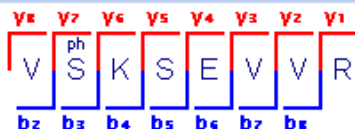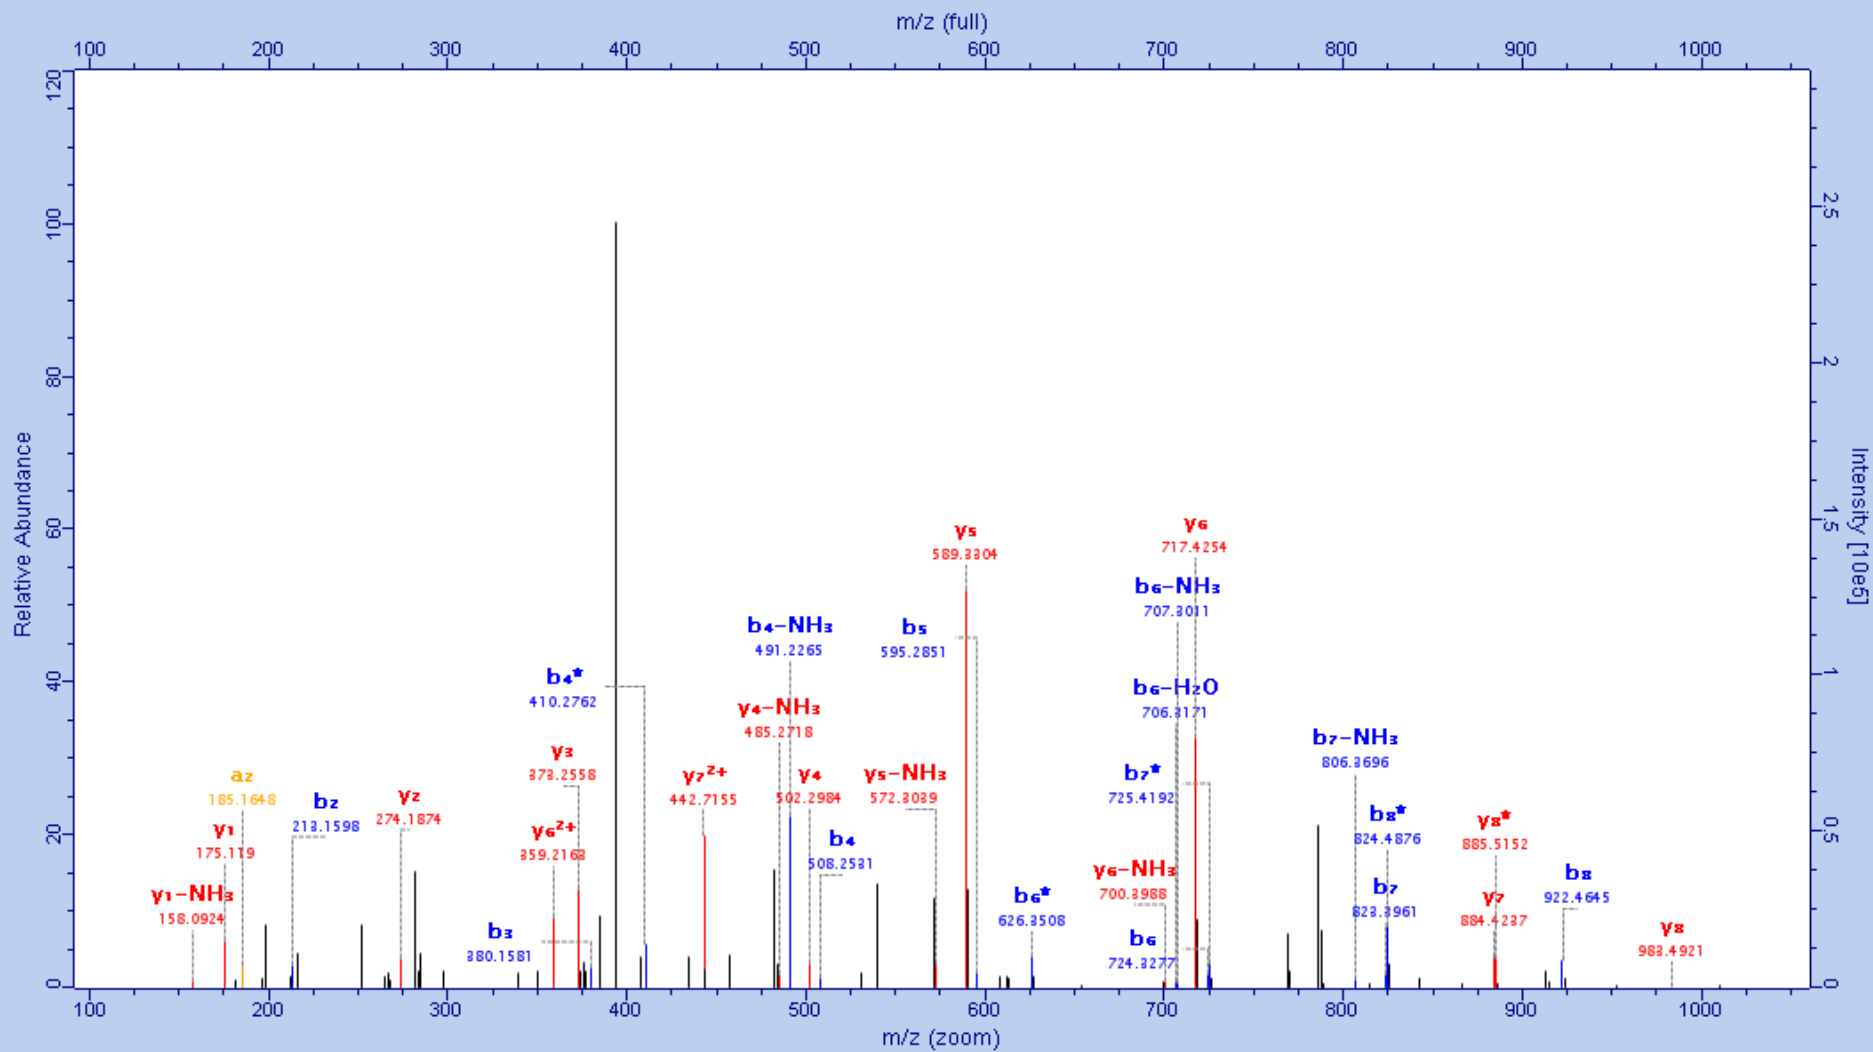

Protein: gil46200157  
 Score: 135.47  
 Source: AWAN-FT\_090928  
 Scannumber: 2771  
 Method: ITMS; CID: 1

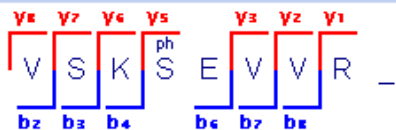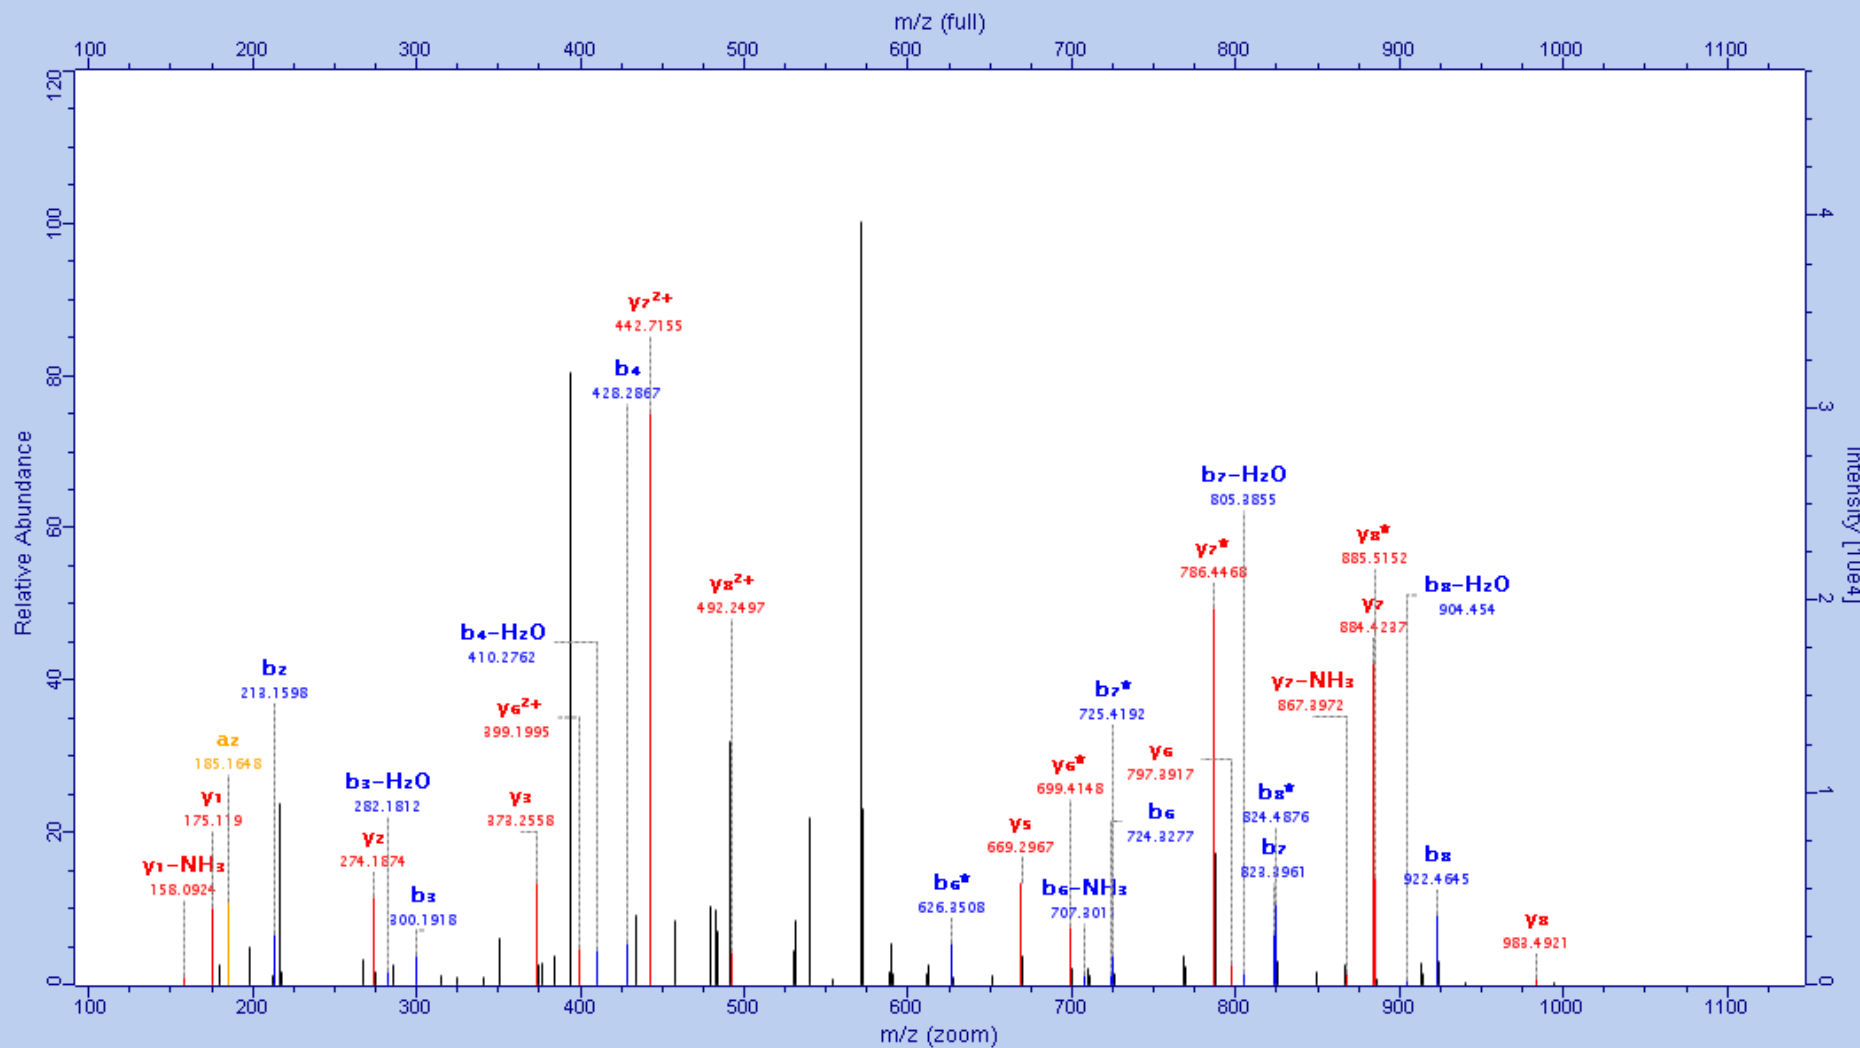

Protein: gil46200158  
 Score: 133.57  
 Source: service\_11  
 Scannumber: 7424  
 Method: ITMS; CID; 1

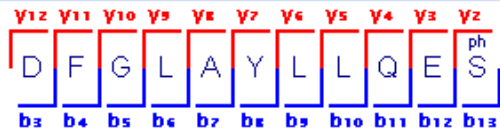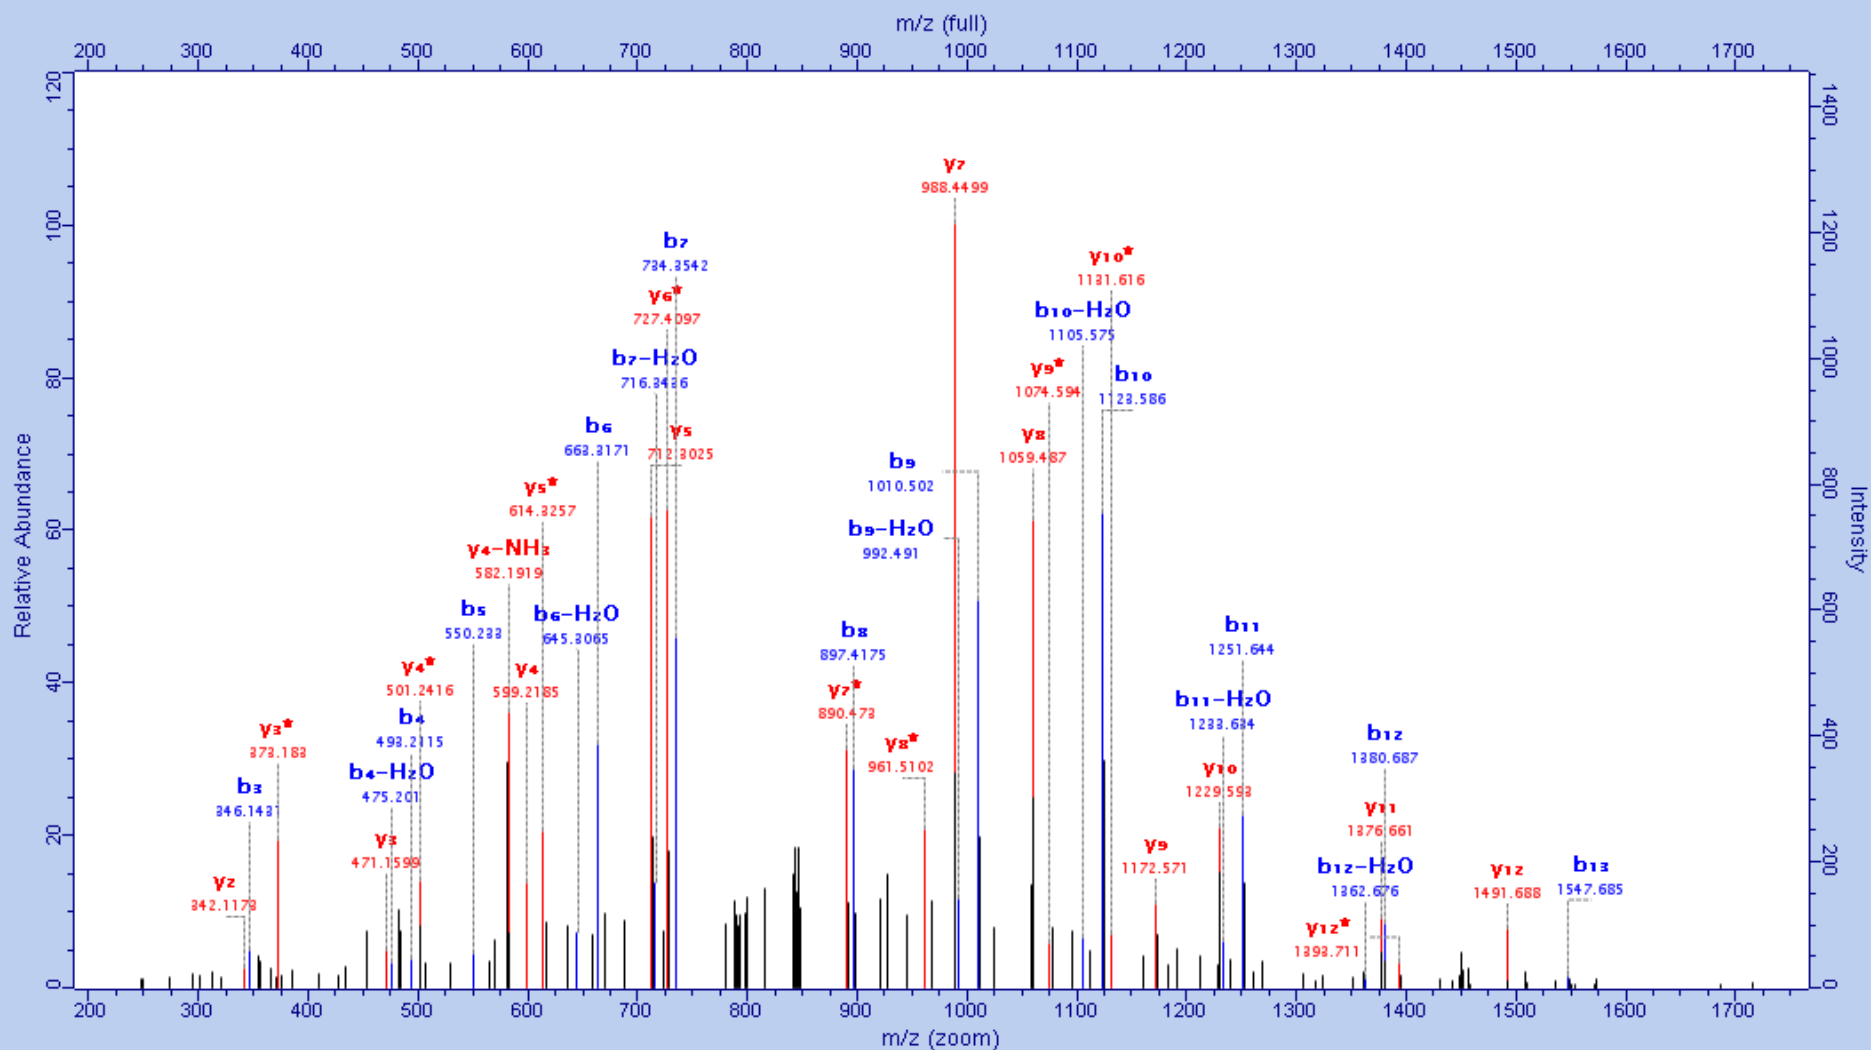



Protein: gil46200158  
 Score: 83.18  
 Source: AWAN-FT\_090928  
 Scannumber: 5262  
 Method: ITMS; CID; 1

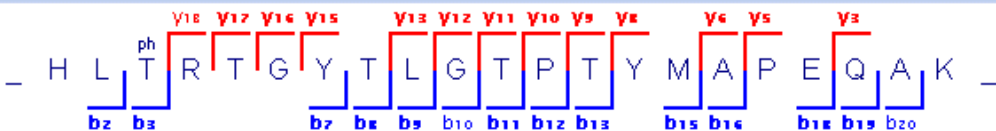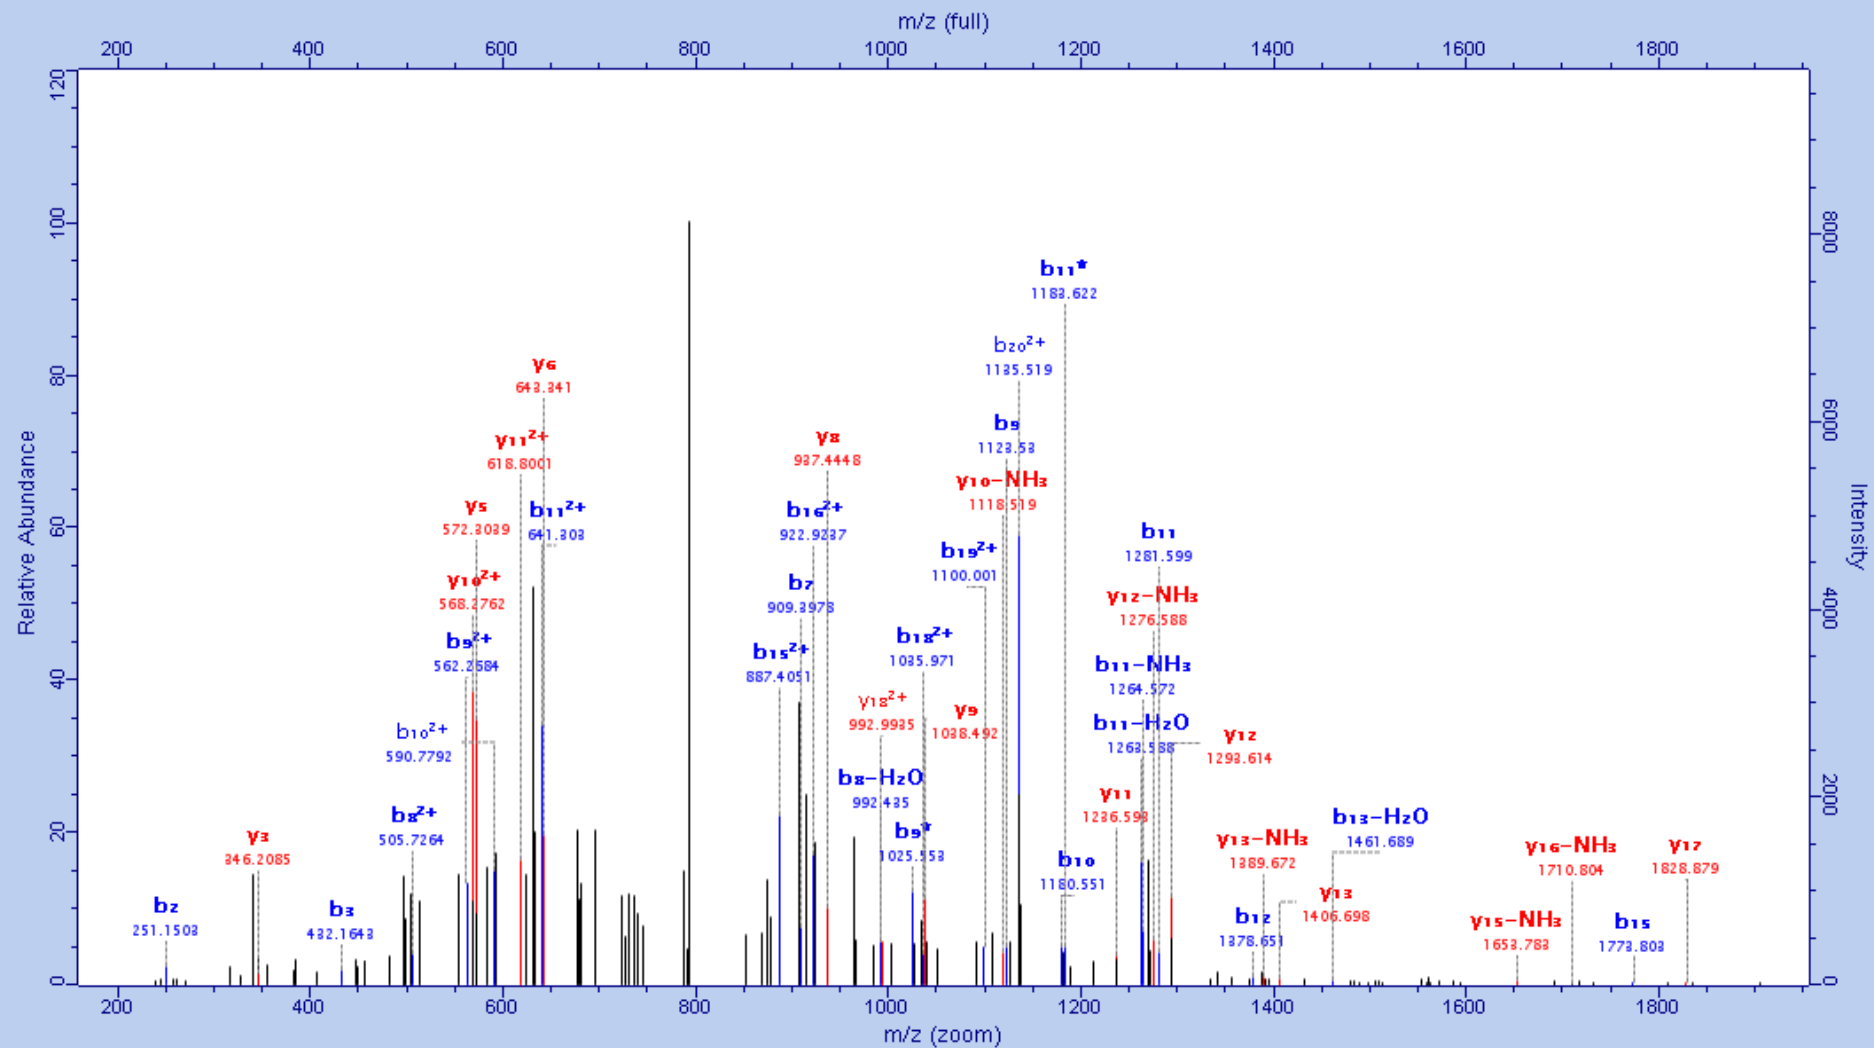

Protein: gil46200158  
 Score: 238.22  
 Source: AWAN-FT\_090328  
 Scannumber: 4981  
 Method: ITMS; CID; 1

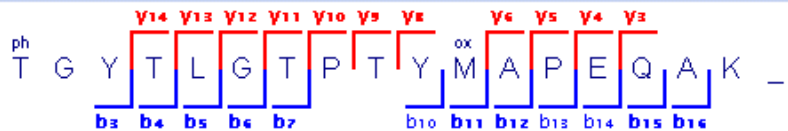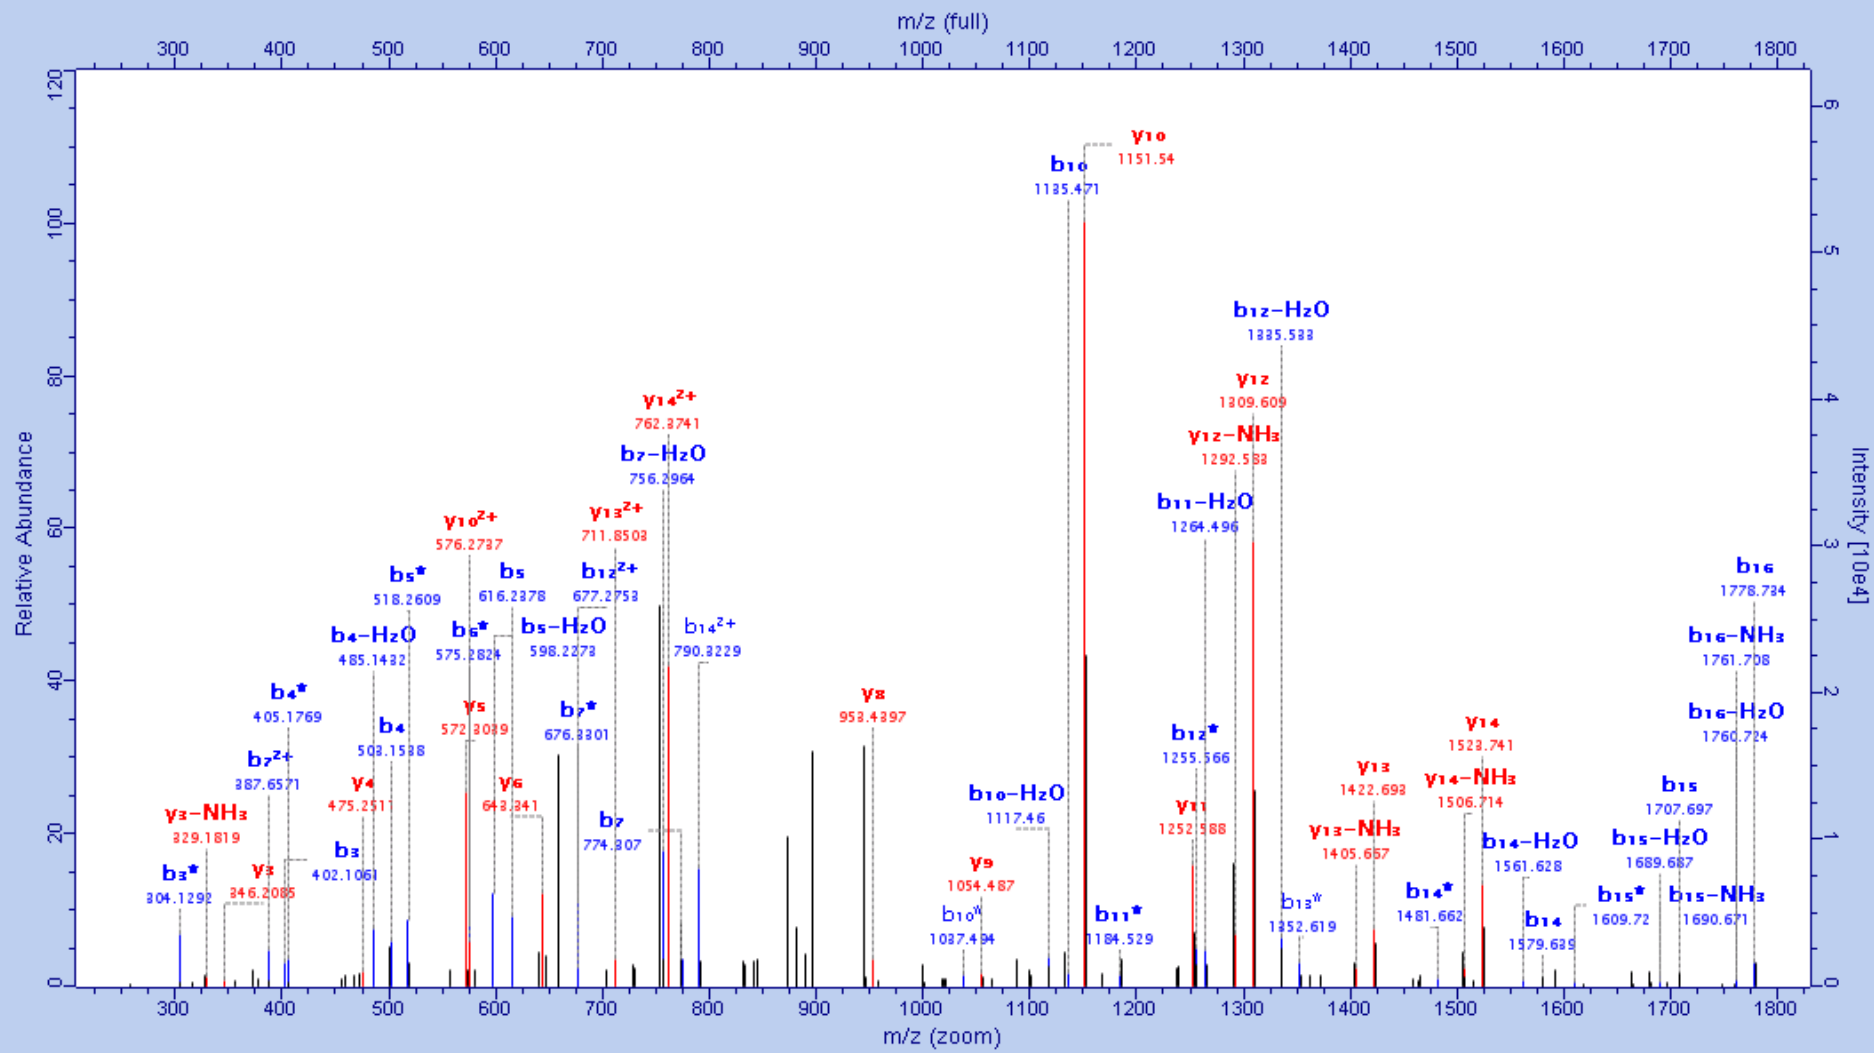

Protein: gil46200158  
 Score: 47.27  
 Source: AWAN-13-14\_090928  
 Scannumber: 5381  
 Method: ITMS; CID; 1

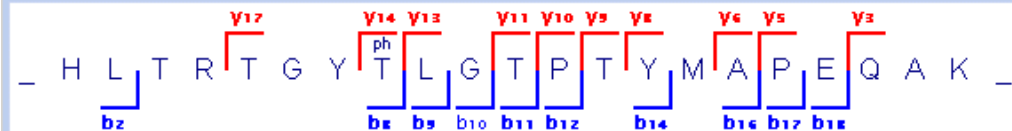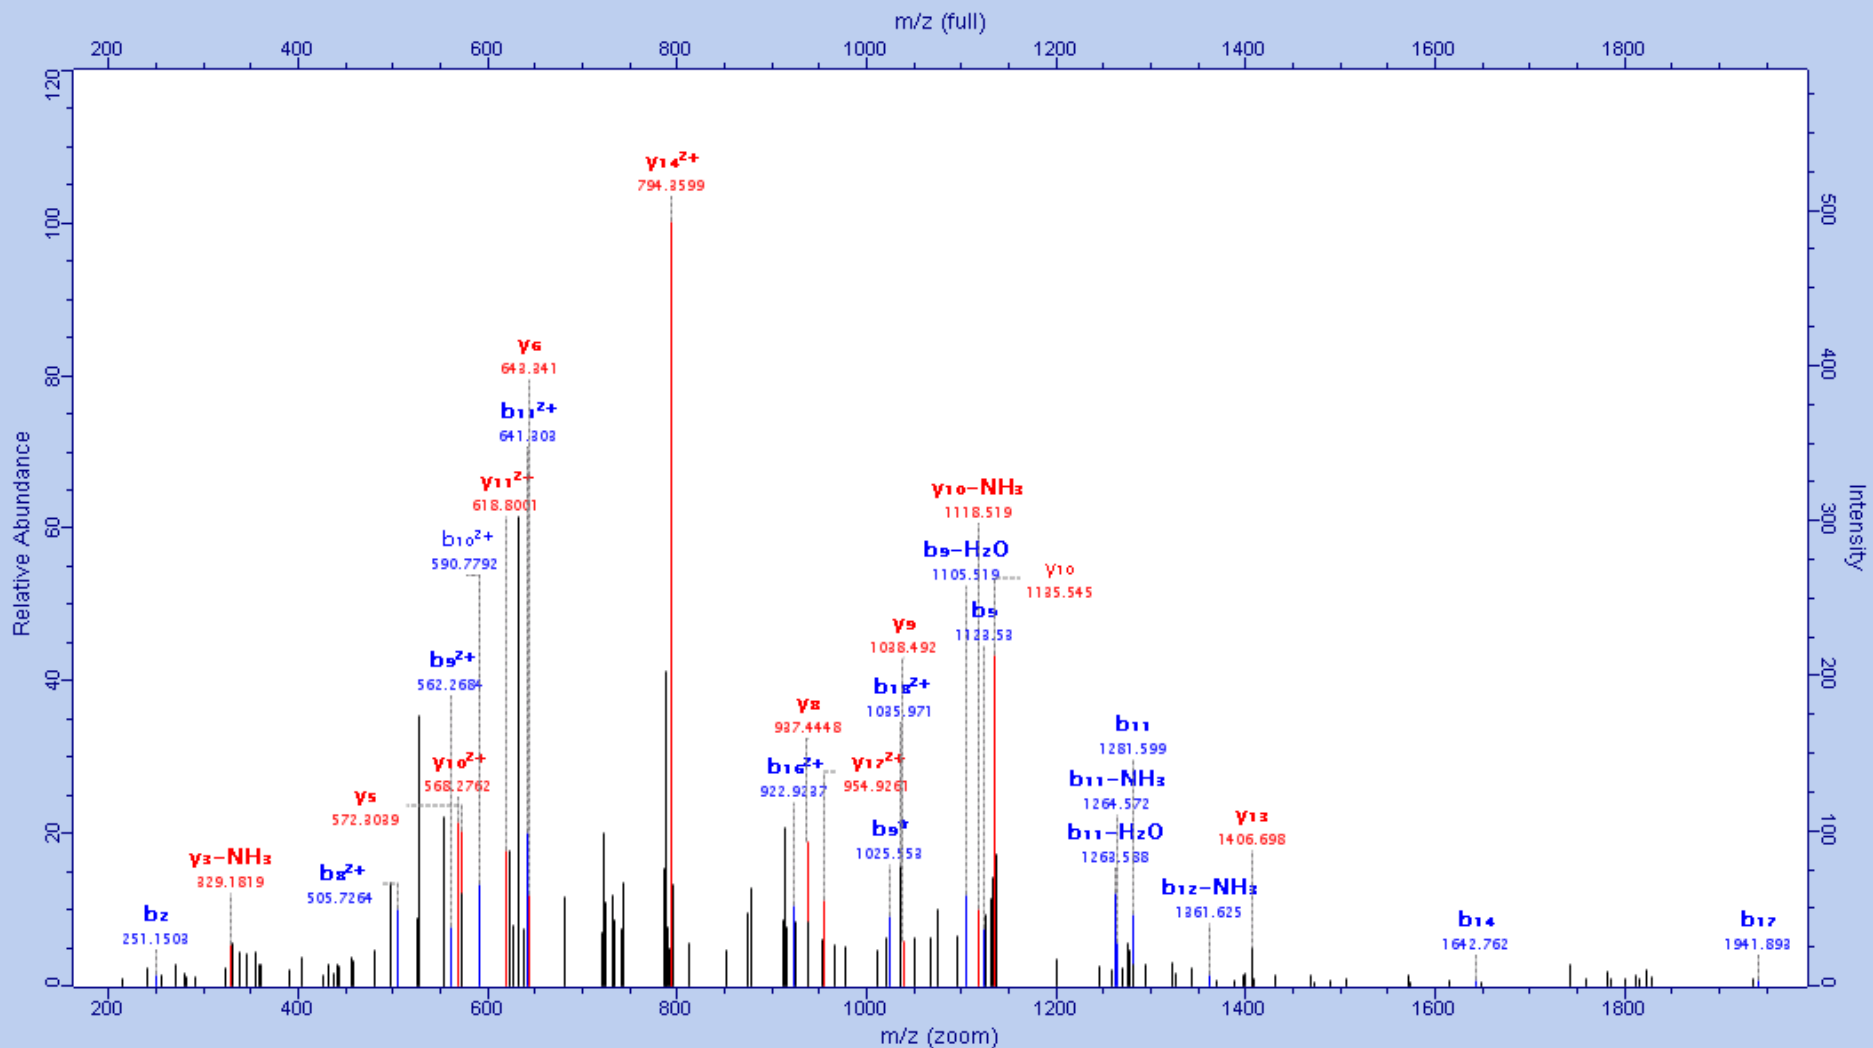

Protein: gij46200158  
Score: 0  
Source: AWAN-19-21\_090928  
Scannumber: 5373  
Method: ITMS; CID; 1

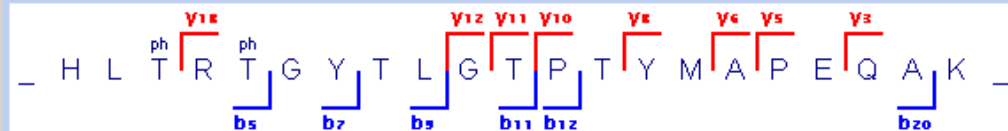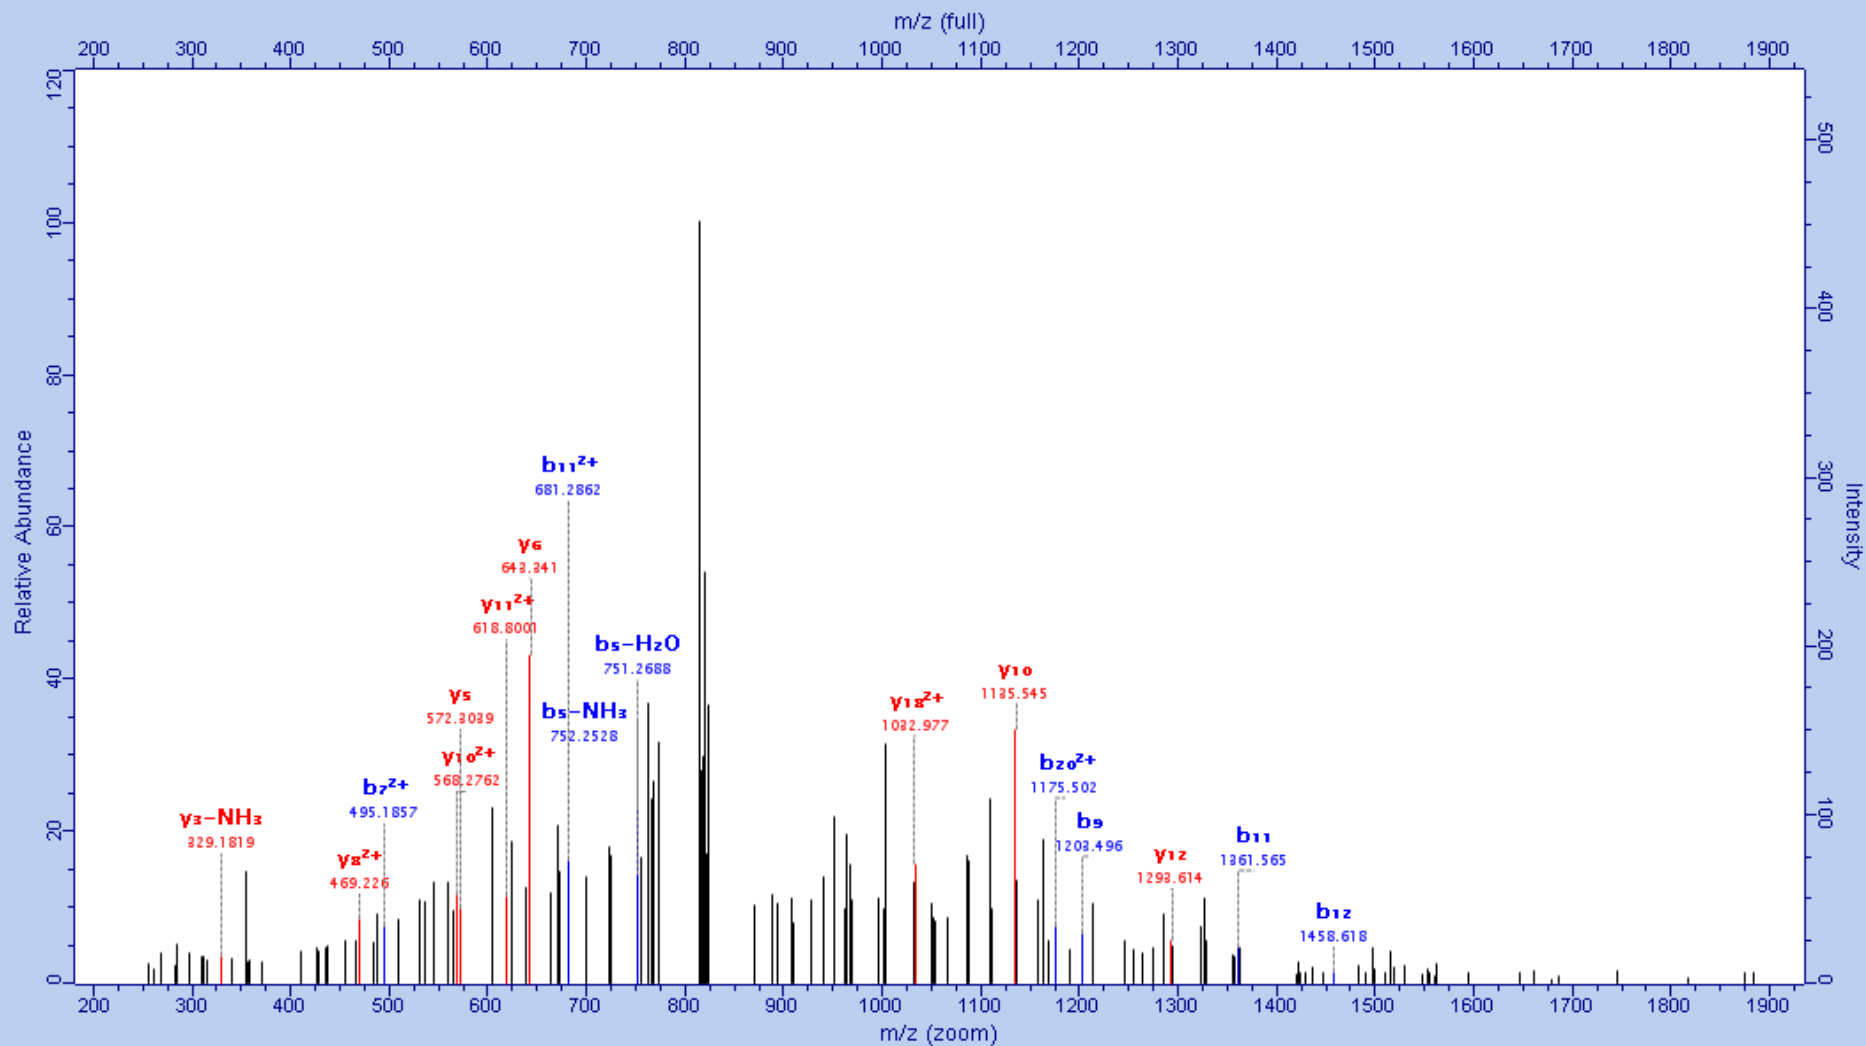

Protein: gil46200158  
Score: 124.97  
Source: service\_HB3  
Scannumber: 3366  
Method: ITMS; CID; 1

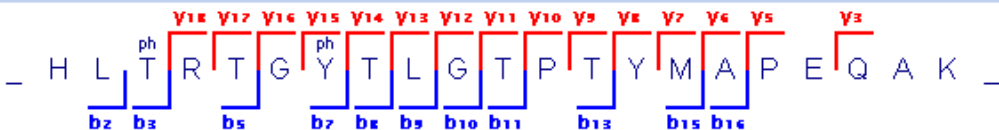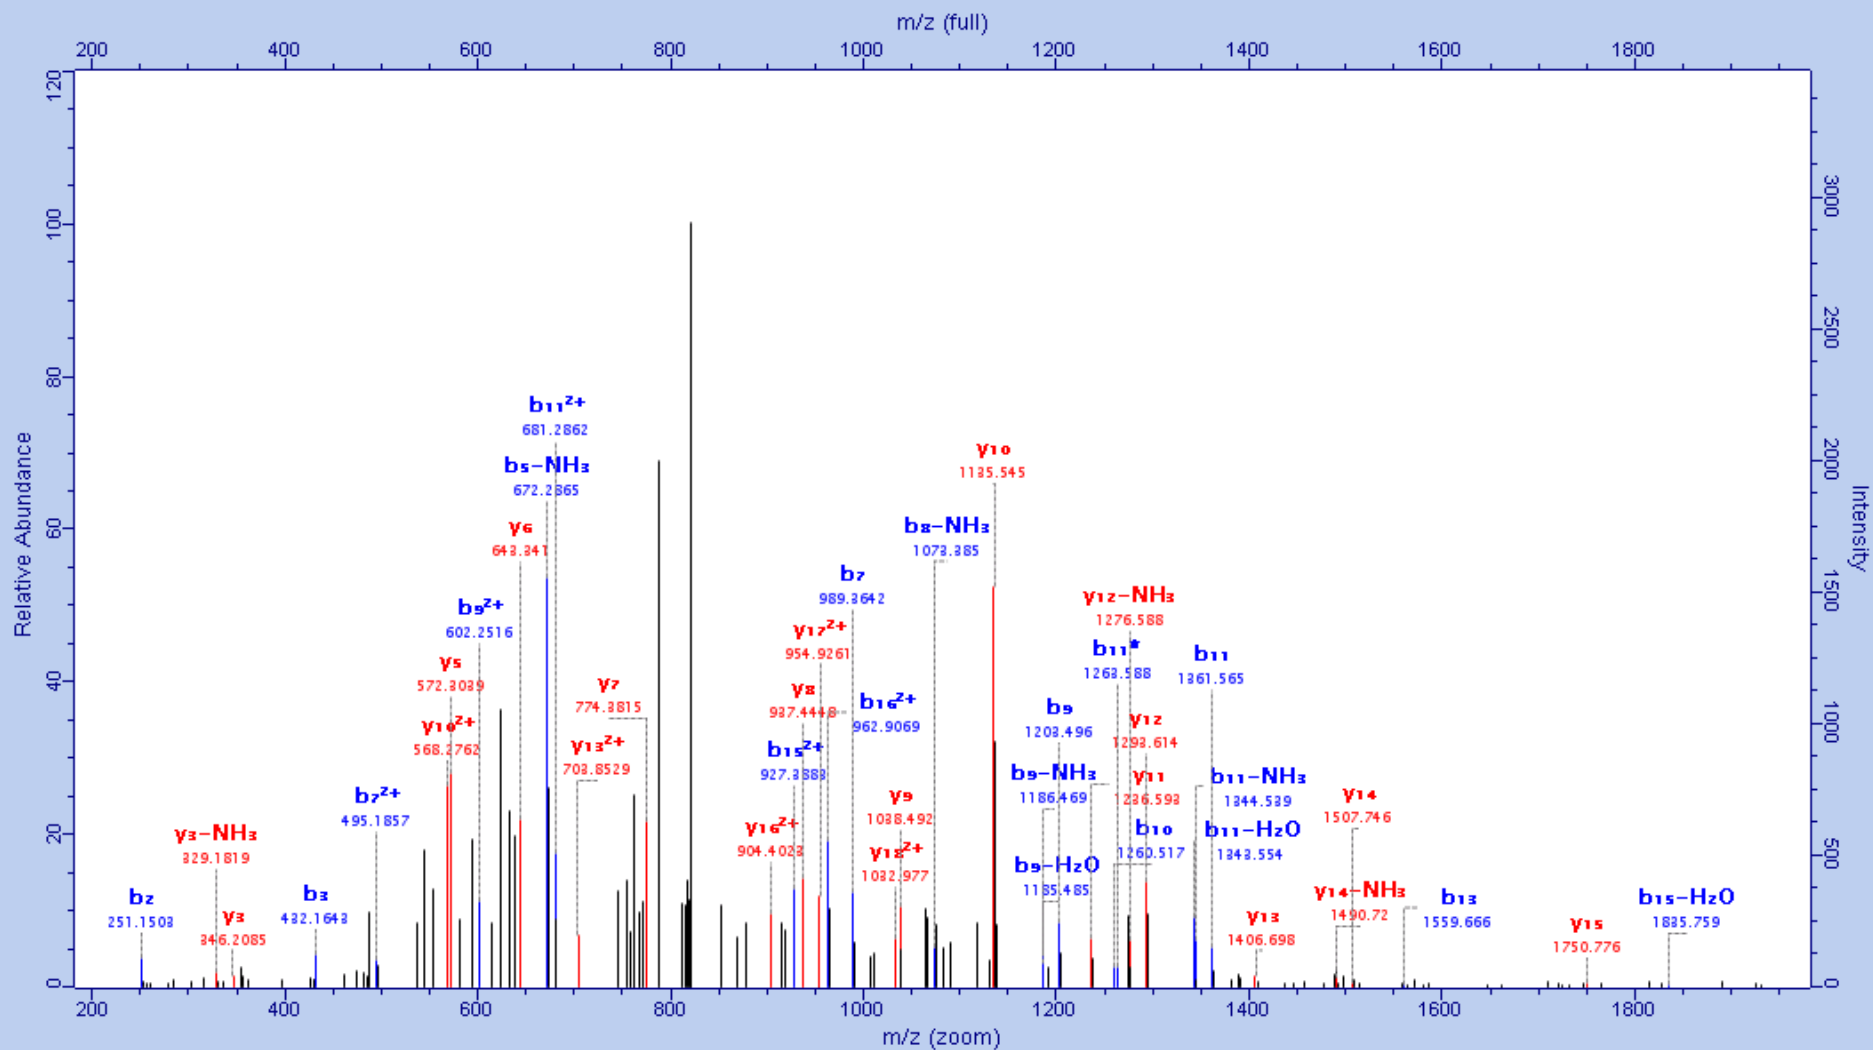

Protein: gil46200158  
Score: 0  
Source: service\_HB13  
Scannumber: 4091  
Method: ITMS; CID; 1

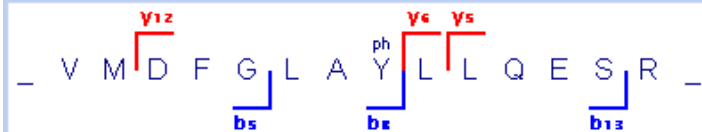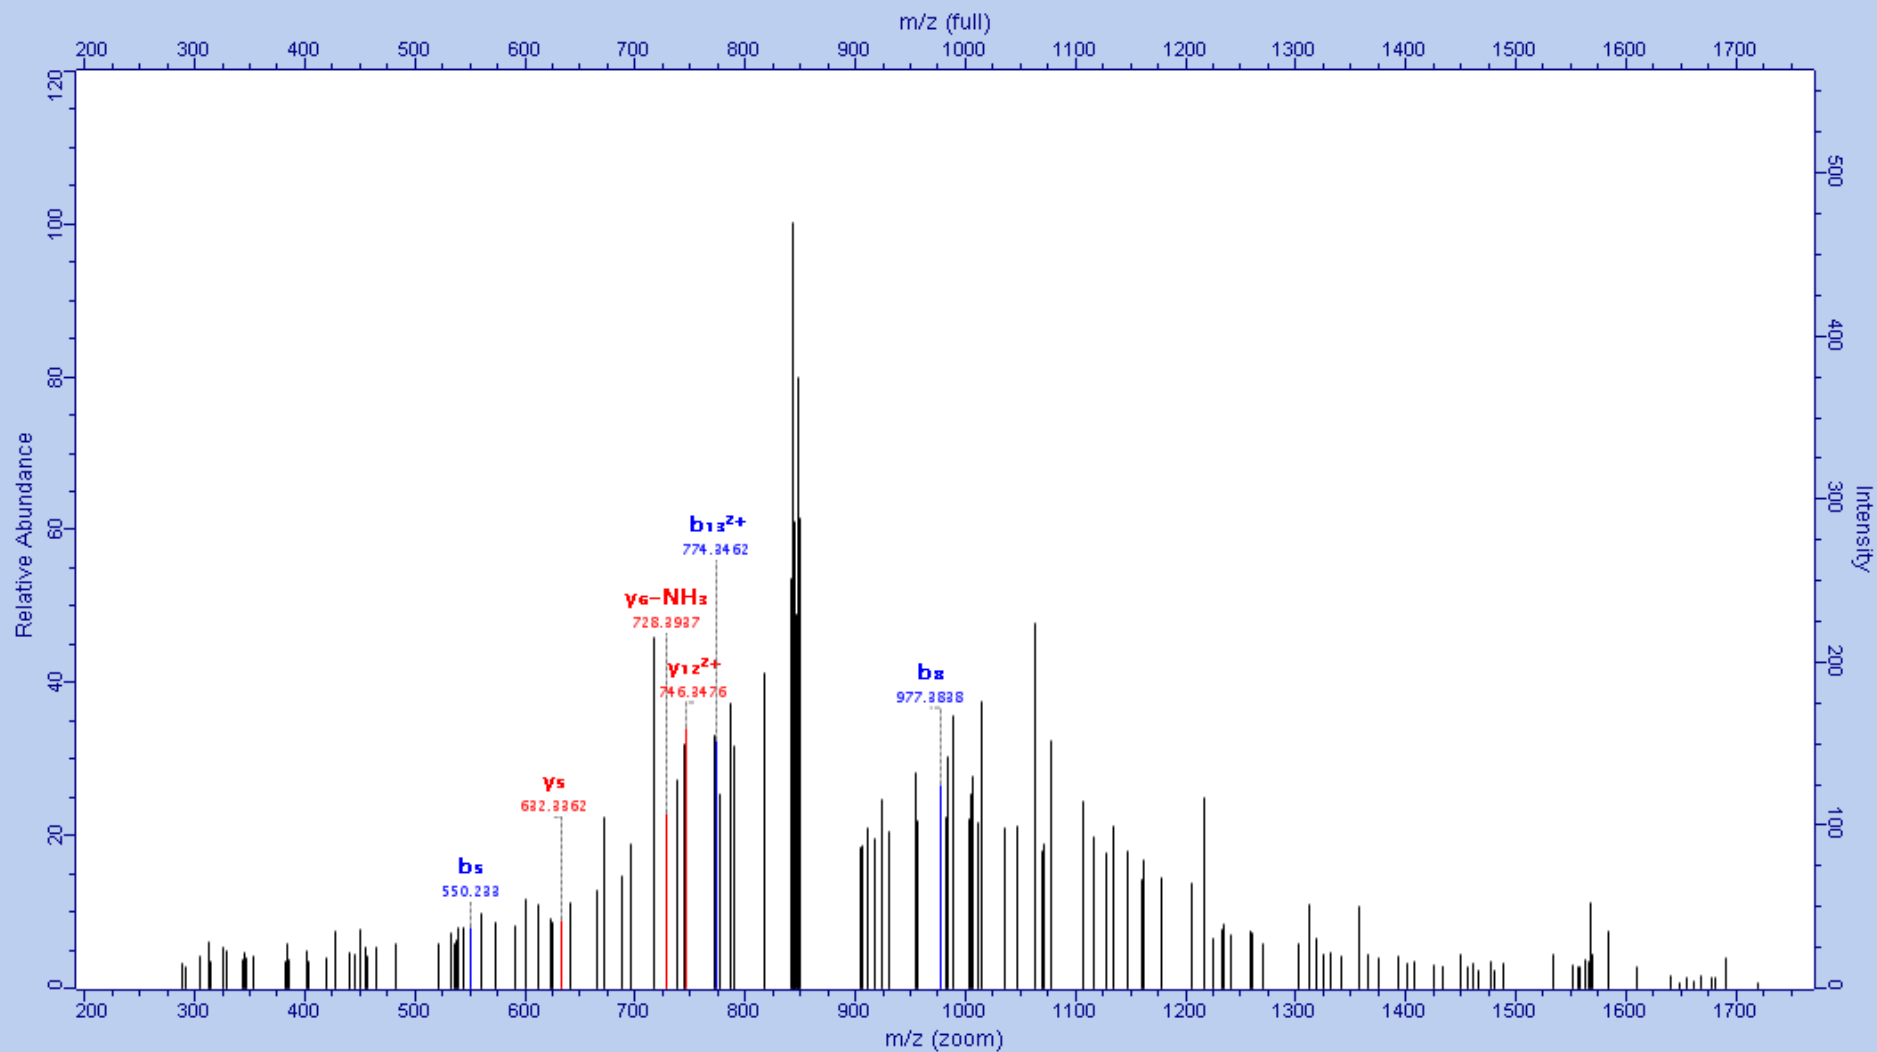

Protein: gil46200190  
 Score: 144.75  
 Source: AWAN-FT\_090928  
 Scannumber: 8973  
 Method: ITMS; CID; 1

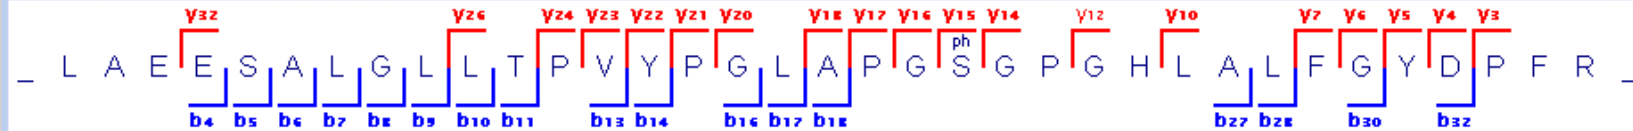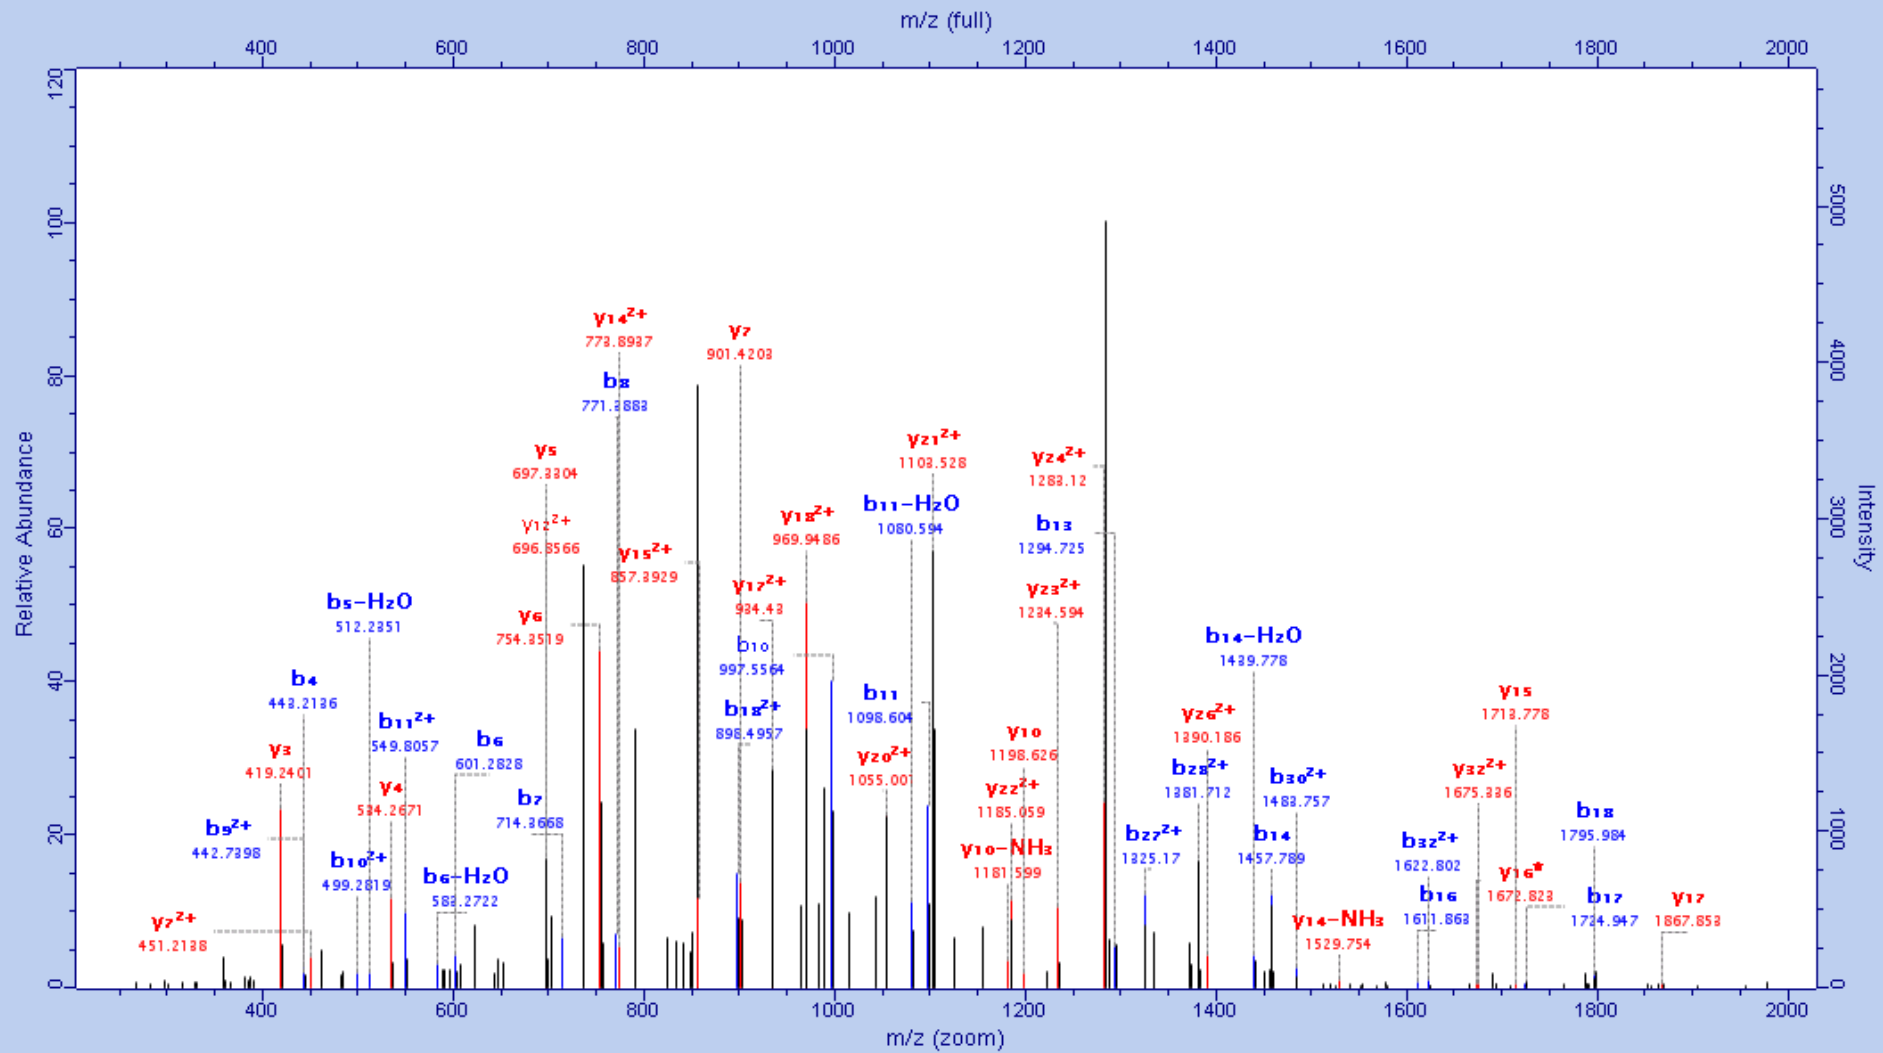

Protein: gil46200130  
 Score: 70.76  
 Source: AWAN-FT\_090328  
 Scannumber: 5307  
 Method: ITMS; CID; 1

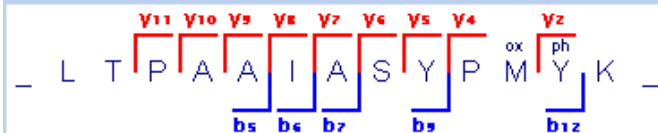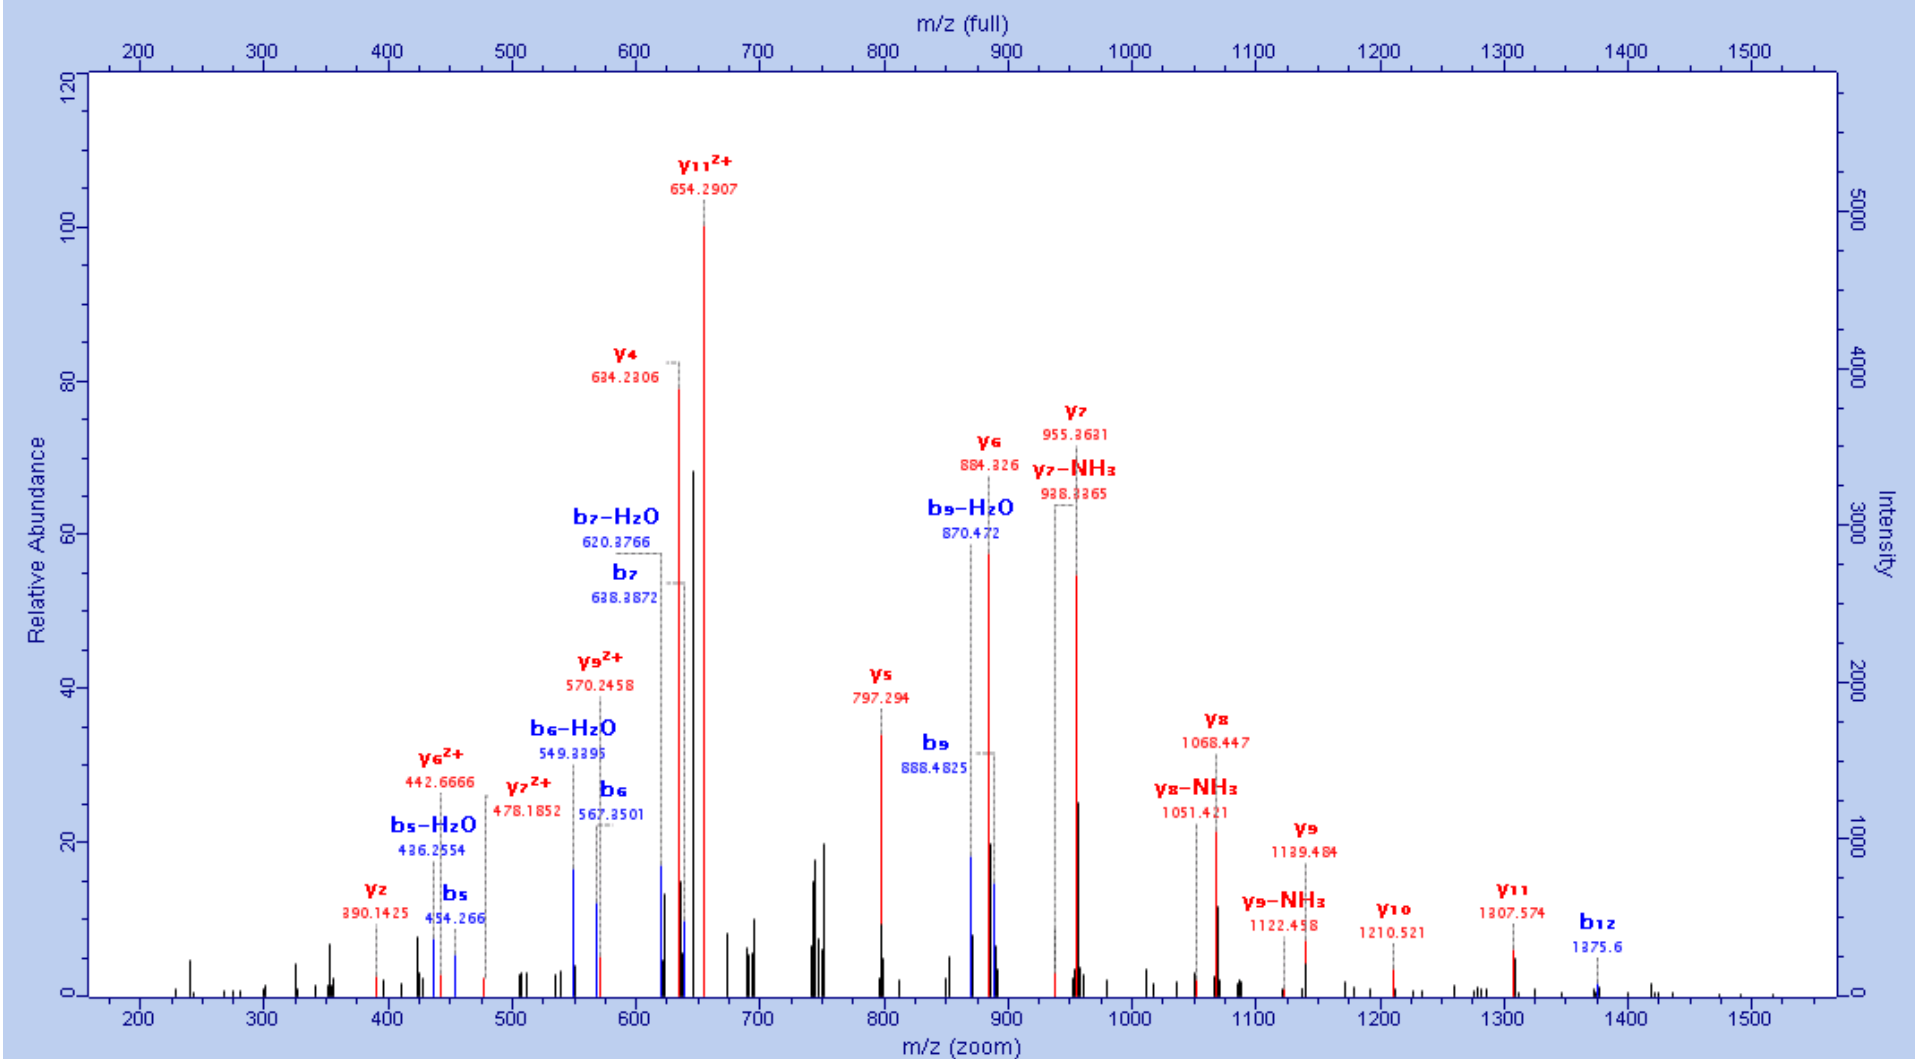



Protein: gil46200206  
 Score: 57.22  
 Source: service\_HB16  
 Scannumber: 4945  
 Method: ITMS; CID; 1

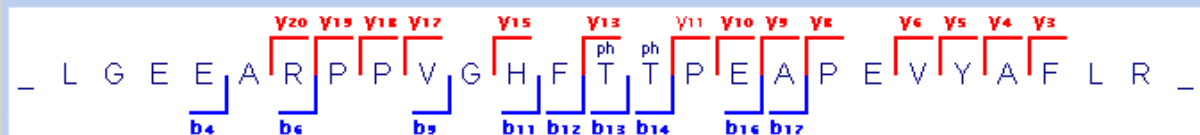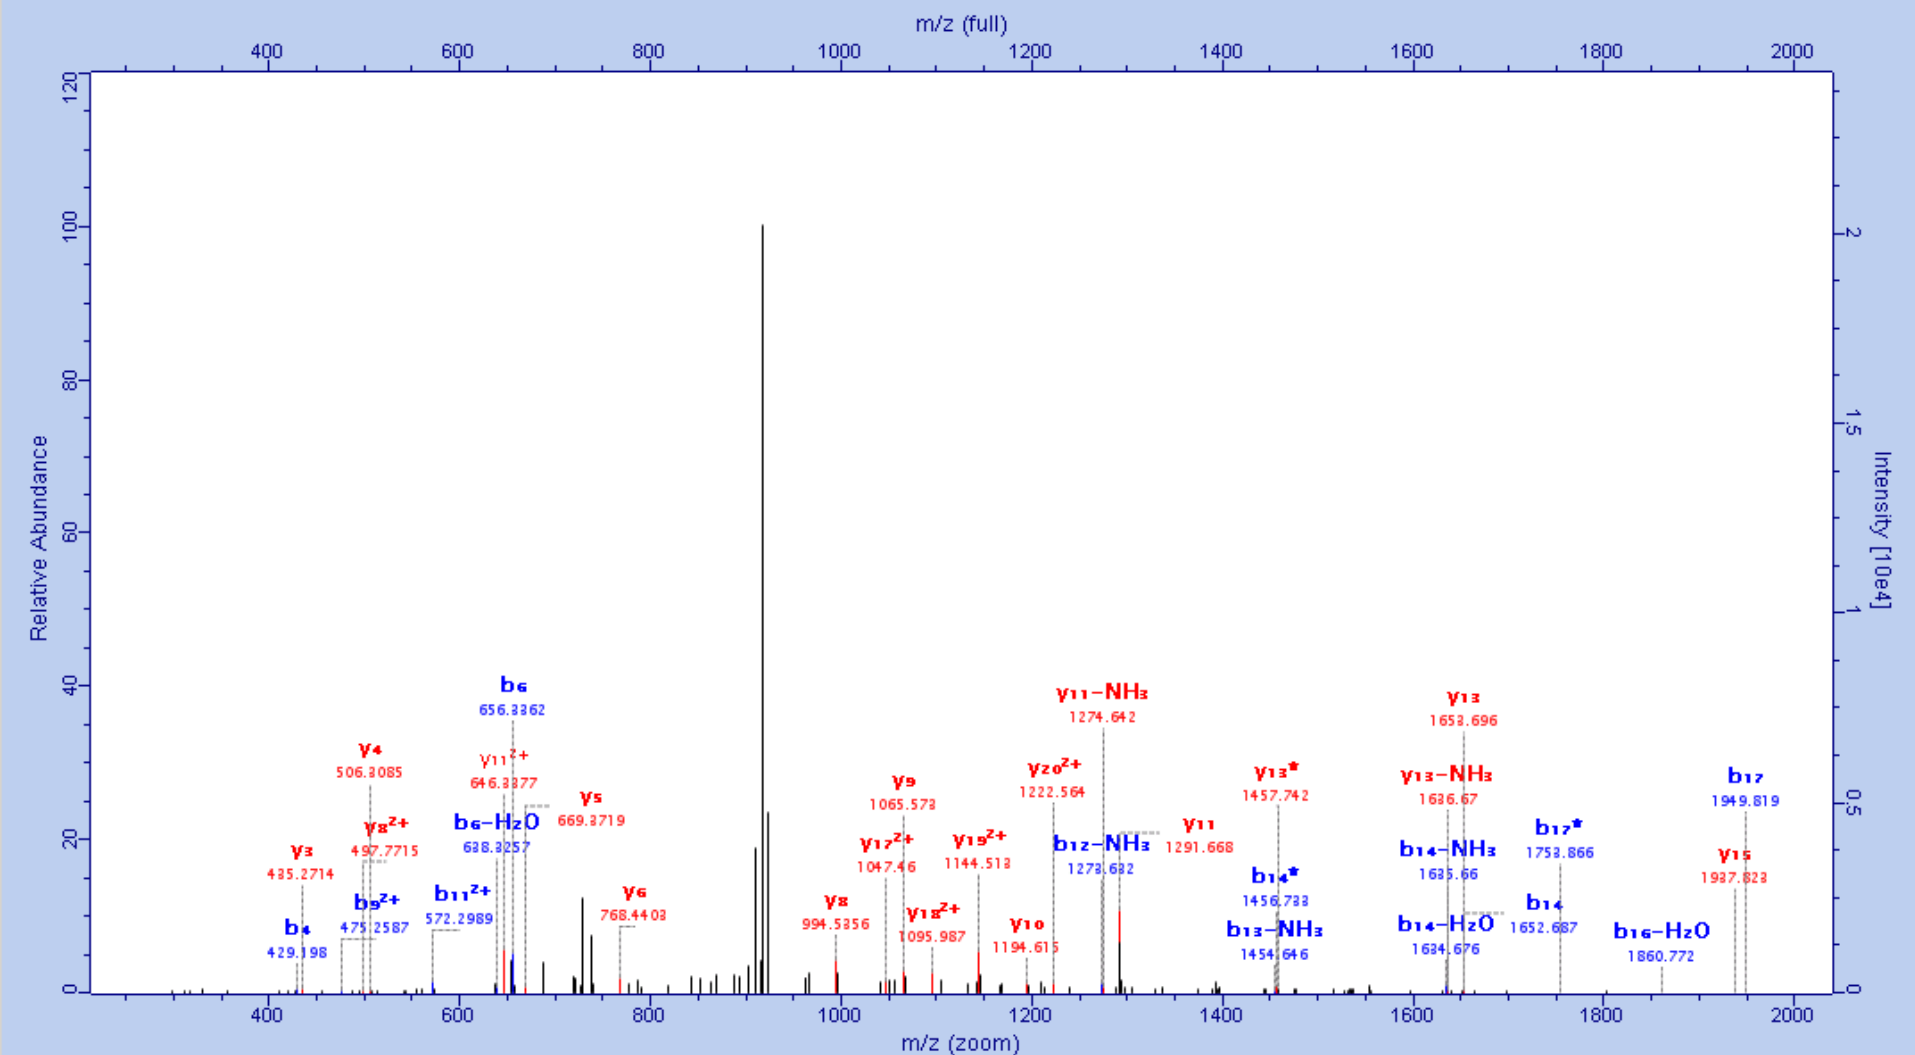

Protein: gil46200259  
 Score: 138.21  
 Source: AWAN-FT\_090928  
 Scannumber: 7306  
 Method: ITMS; CID; 1

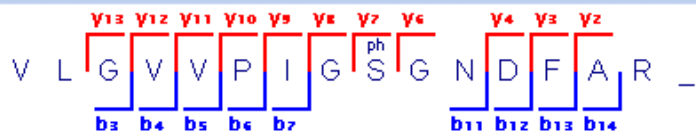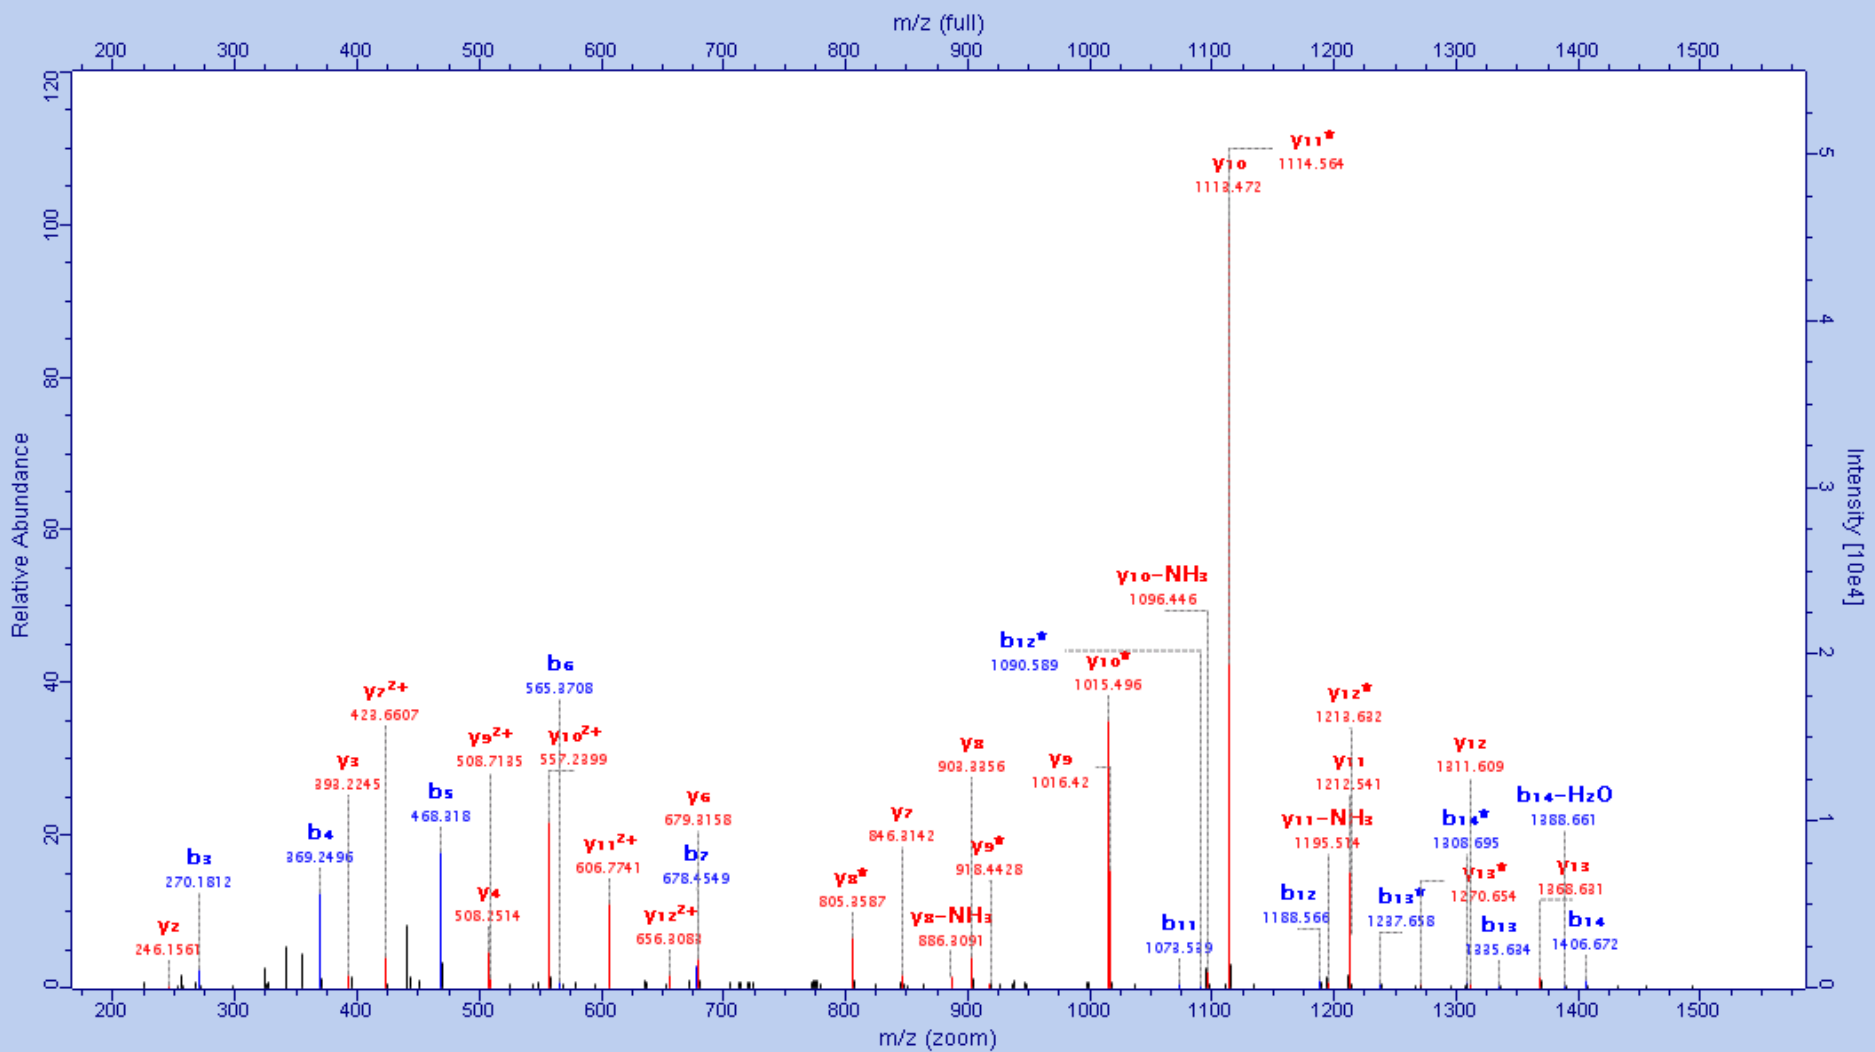

Protein: gjl46200262  
 Score: 76.88  
 Source: AWAN-19-21\_090928  
 Scannumber: 7495  
 Method: ITMS; CID; 1

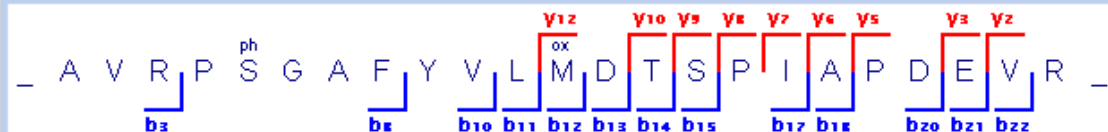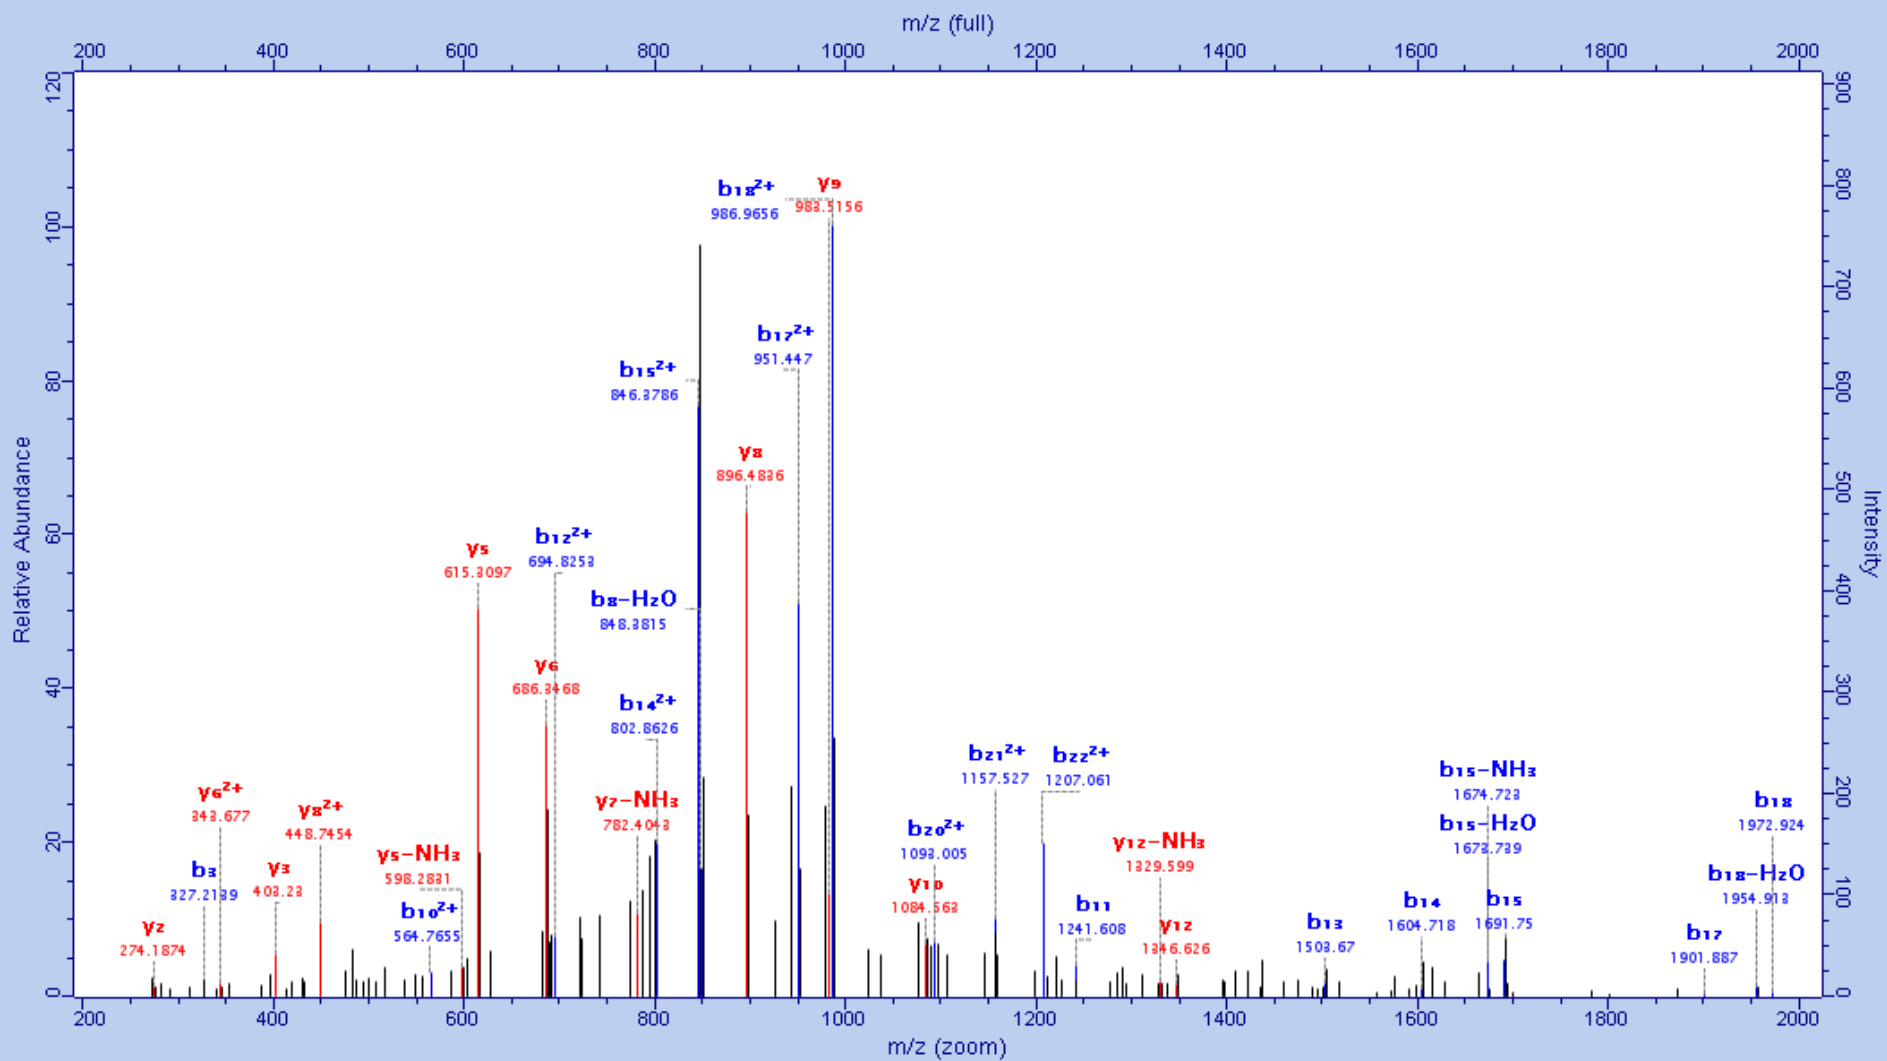

Protein: gil46200262  
 Score: 124.25  
 Source: AWAN-FT\_090928  
 Scannumber: 7509  
 Method: ITMS; CID; 1

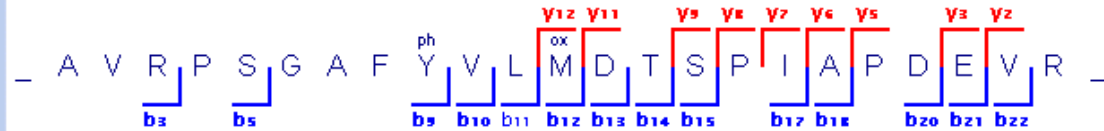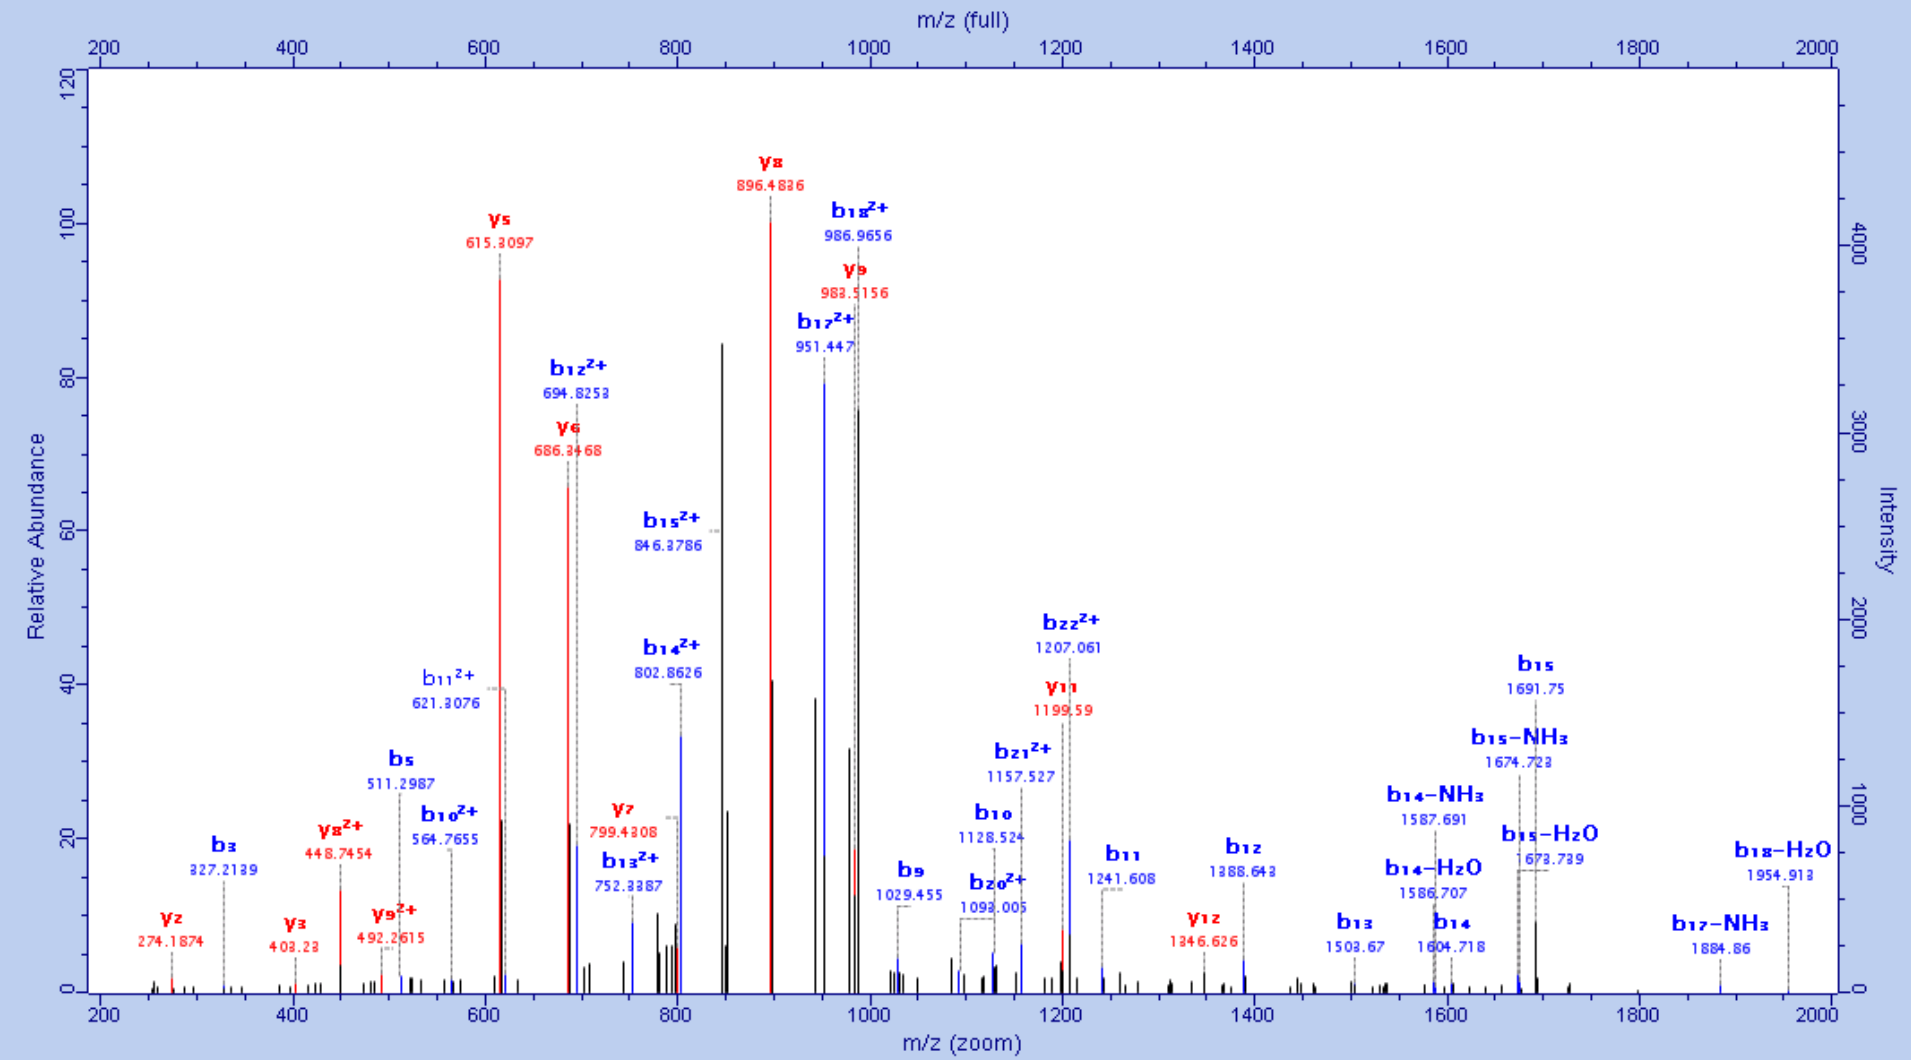

Protein: gil46255093  
 Score: 101.79  
 Source: service\_HB3  
 Scannumber: 3334  
 Method: ITMS; CID; 1

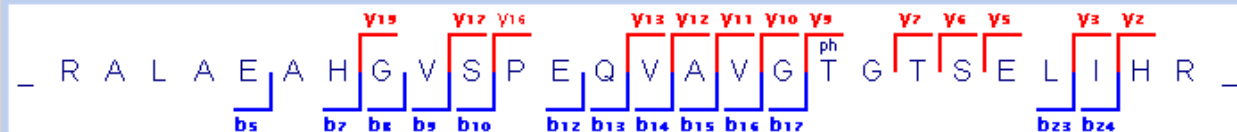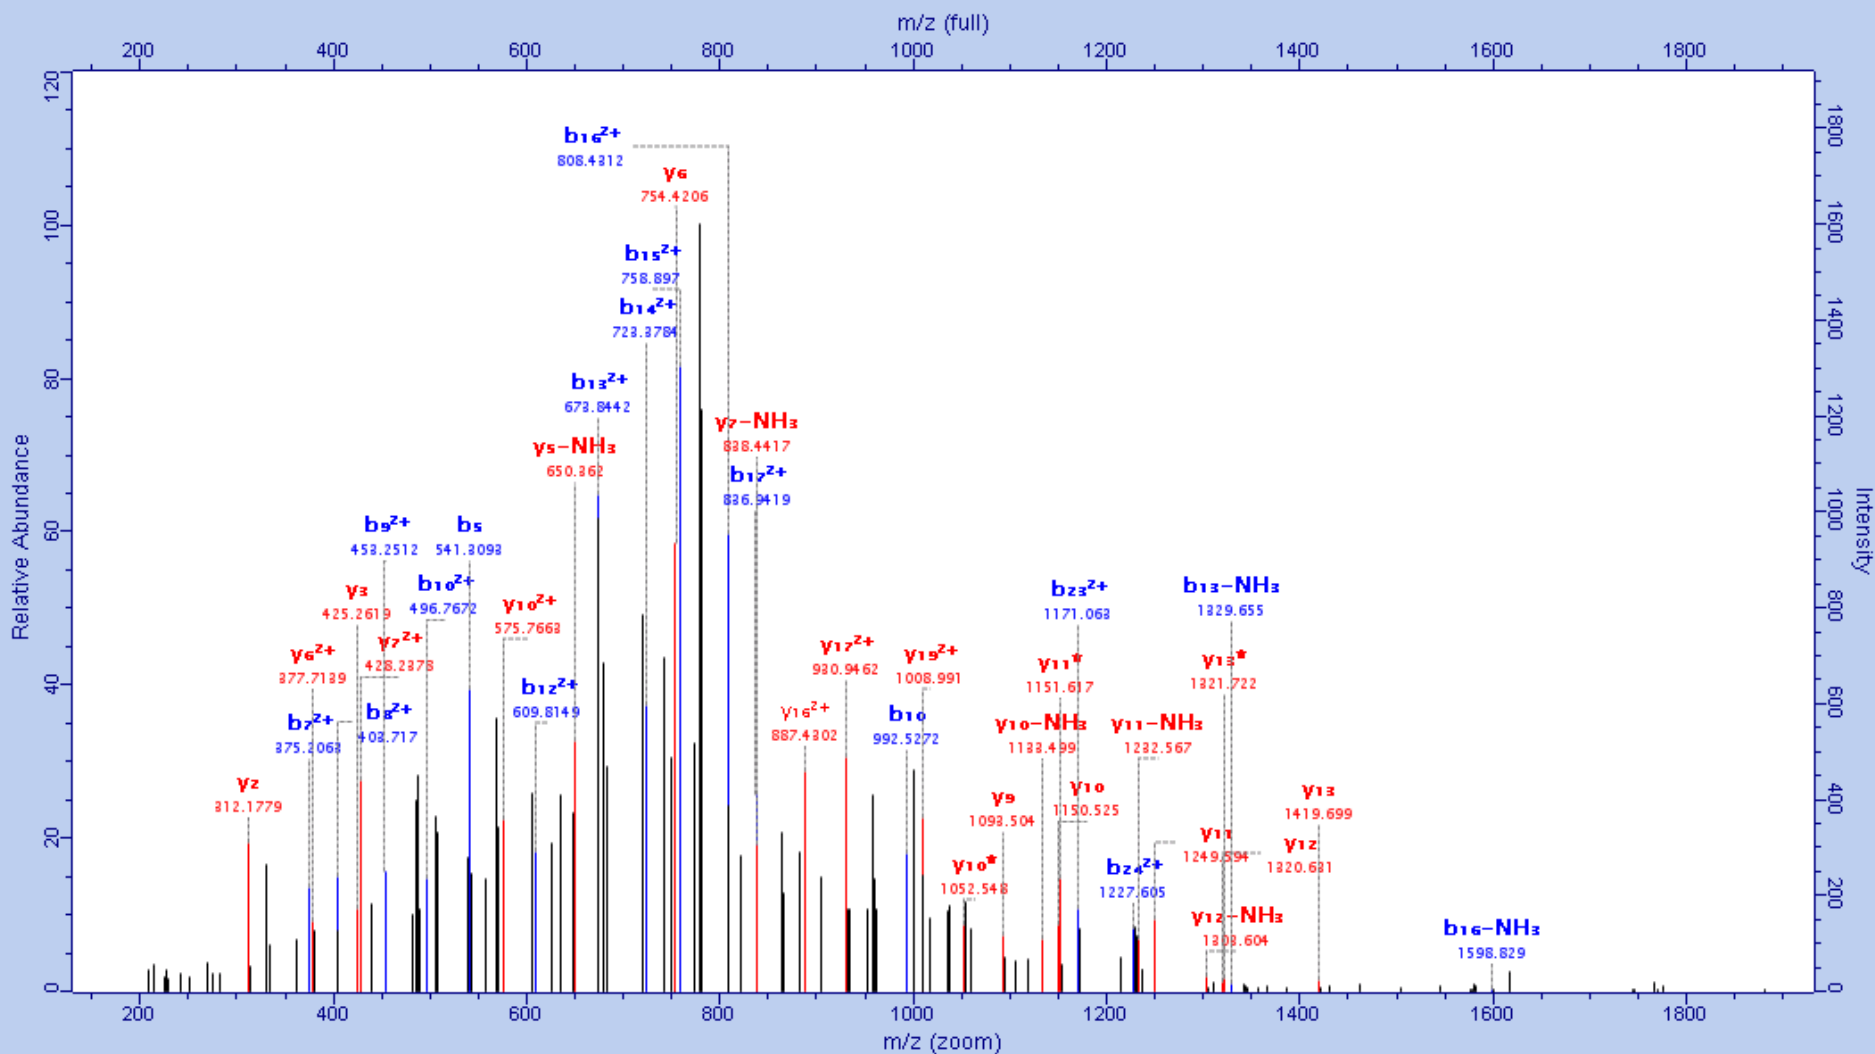

Protein: gil46255095  
 Score: 72.6  
 Source: AWAN-19-21\_090928  
 Scannumber: 8216  
 Method: ITMS; CID; 1

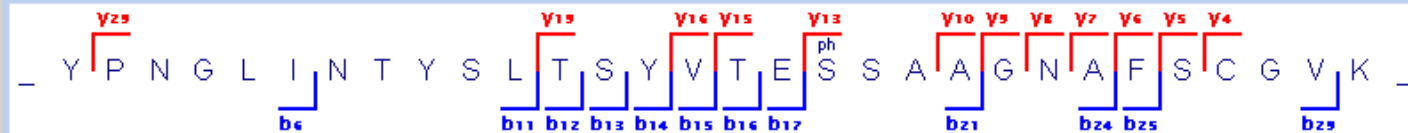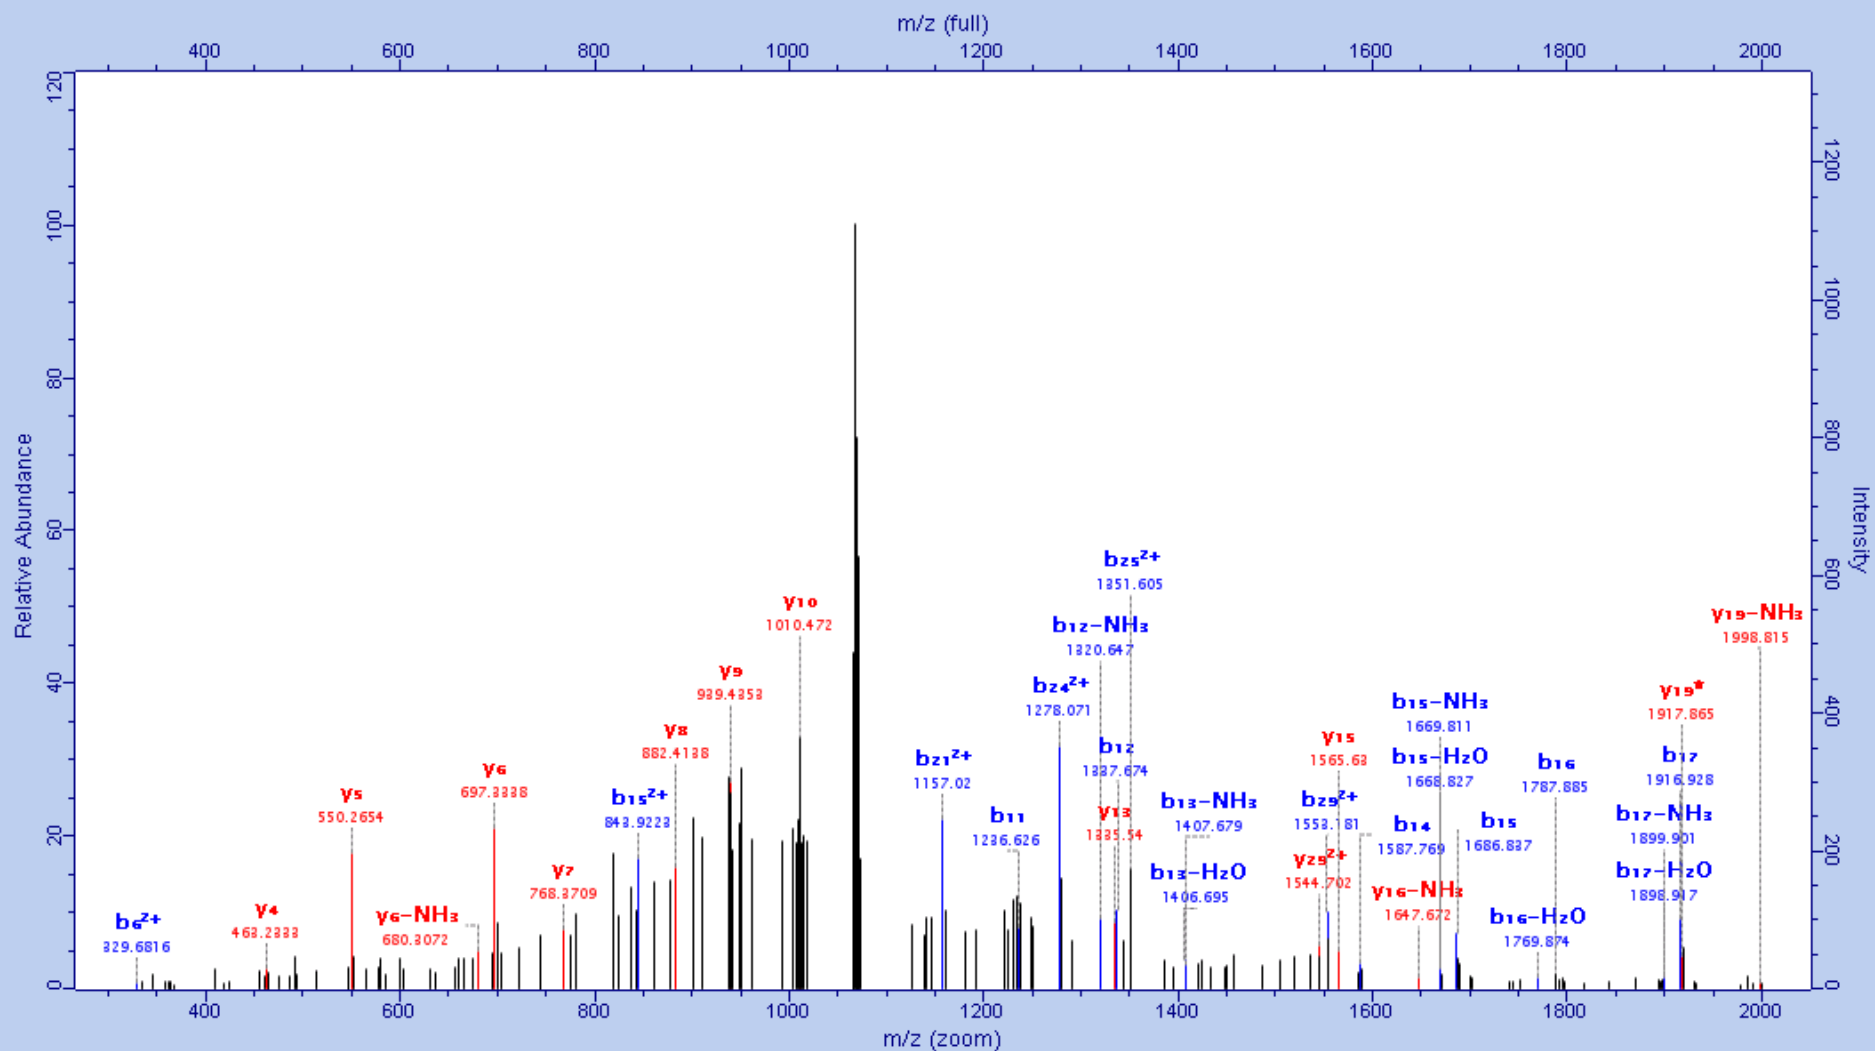

Supplement: supp_M113.029330_mcp.M113.029330-1.pdf [file supp_M113.029330_mcp.M113.029330-1.pdf]
